# Supplementary material
Source: Research Square preprint supplement (doi:10.21203/rs.3.rs-8897134/v1)
Supplement: Supplementary file 1 [file 9120b29193a0b7b75d2804b7.xlsx]

## Sheet: Table S1. Diversity and distrib
Antibiotic resistance	Resistance gene and Resistant bacteria	Read numbers
		CARD	Gene_Count
Multidrug	AcrE、MexH、mtrE、mepA、salA、farB、marA、Bifidobacterium adolescentis rpoB mutants conferring resistance to rifampicin、MexA、MexB、Staphylococcus aureus LmrS、lsaA、norB、Klebsiella pneumoniae KpnH、mdtB、adeH、OprN、mgrA、vga(E) Staphylococcus cohnii、srmB、vgaALC、cfrA、farA、Pseudomonas aeruginosa emrE、Pseudomonas aeruginosa CpxR、optrA、gadW、lmrP、MuxB、LAP-2、abeS、adeB、cmeC、mdtE、mtrD、arlR、tlrC、vgaE、MexJ、adeC、cdeA、msb…	3903842	4742
Beta-lactam	CTX-M-14、CARB-16、OXA-209、ACC-2、GOB-11、ACT-23、OXY-2-3、GOB-6、ADC-59、Escherichia coli ampH beta-lactamase、NDM-1、ACT-2、OCH-3、cepA、Laribacter hongkongensis ampC beta-lactamase、FTU-1、AIM-1、ACC-3、CMY-59、LRA-5、Bla2、BRO-1、GOB-13、GOB-9、mecA、OXY-1-1、LEN-41、SRT-2、Burkholderia pseudomallei Omp38、mecR1、CcrA、TEM-1、SHV-71、ACT-35、SRT-1、mecB、OXA-476、mecD、LRA-18、PEDO-2、FPH-1、OXA-1、ACC-4、CMY-70、PC1 beta-lactamase (b…	372884	387
Glycopeptide	vanRA、vanSL、vanXO、vanTrL、vanXYG、vanO、vanRG、vanUG、vanRC、vanSN、vanHD、vanTmL、vanRE、vanRO、vanWI、vanM、vanRM、vanSB、vanHM、vanYA、vanXYL、vanRI、vanF、vanSG、vanHF、vanTC、vanTE、vanE、vanYG1、vanB、vanSM、vanYB、vanZF、vanC、vanG、vanRB、vanTN、vanRL、vanSF、vanXYE、vanTG、vanL、vanRD、vanRN、vanSC、vanHO、vanWG、vanD、vanRF、vanSA、vanSD、vanSO、vanXYN、vanKI、vanYM、vanZA、BRP(MBL)、vanSE、vanHB、vanYF、vanWB、vanXYC、vanI、vanN、vanHA、vanVB	804186	1716
Aminoglycoside	acrD、AAC(3)-VIa、AAC(6')-Iaa、AAC(6')-Iad、aadA11、spd、APH(2'')-IIa、APH(2'')-IVa、aadA10、AAC(2')-Ia、AAC(6')-Ia、APH(3'')-Ia、AAC(3)-Ic、APH(3')-IIIa、APH(6)-Ic、AAC(6')-Ian、AAC(6')-34、aadA14、aad(6)、aadA16、APH(6)-Id、ANT(4')-Ib、AAC(3)-IV、aadA27、AAC(6')-31、aadA5、aadA13、ANT(9)-Ia、APH(4)-Ia、APH(9)-Ia、aadA25、AAC(3)-Xa、APH(3')-IIa、aadS、AAC(3)-IIIb、AAC(3)-IXa、AAC(6')-Iid、AAC(6')-Iih、ANT(6)-Ia、AAC(3)-IId、rmtB、AAC(6…	120716	197
MLS	mphA、mphB、Erm(31)、Erm(30)、mphE、ErmD、macB、macA、Mef(En2)、tlrB conferring tylosin resistance、vatB、vatD、Escherichia coli emrE、lnuG、vatF、Erm(49)、mphC、lnuE、LlmA 23S ribosomal RNA methyltransferase、linG、ErmF、vatA、lnuA、oleI、ErmH、vatE、oleC、VatI、LpeB、Erm(38)、lnuC、mefC、erm(32)、ErmE、mefE、lmrB、vatC、vatH、lmrD、LpeA、ErmQ、oleD、chrB、LnuP、lin、ErmB、ErmT、Erm(34)、RlmA(II)、ErmA、ErmR、Erm(47)、Erm(48)、Erm(42)、mef(B)、Erm(K)	1227216	2036
Tetracycline	otrC、tet(H)、tet36、tet(B)、tet(L)、tet(44)、tet(35)、tetA(46)、tet(52)、tetM、tet(31)、tet(41)、tet(C)、tet(E)、tetT、tetB(46)、tetA(60)、tet(K)、tet(A)、tet(J)、tetS、tetB(P)、tetB(58)、tet(W/N/W)、tet(50)、tet(55)、tet(G)、otr(A)、tet(45)、tetA(58)、tet(56)、tetU、tetO、tet37、tcr3、tetB(60)、tetQ、tetW、tet32、tet(Z)、tet(40)、tet(D)、tetX、tet(38)、tet(42)、otr(B)、tet(59)、tet(39)、tetA(P)、tet(V)、tet(43)	858584	1244
Phenicol	pp-flo、catB11、catQ、catB2、cmlB、cmlv、cmx、Agrobacterium fabrum chloramphenicol acetyltransferase、catII、catV、catB3、catB8、catI、catB10、cmrA、catP、catII from Escherichia coli K-12、Streptococcus suis chloramphenicol acetyltransferase、Enterococcus faecium chloramphenicol acetyltransferase、CatU、cfrC、Pseudomonas aeruginosa catB6、cmlB1、floR、catA8、Rhodococcus fascians cmr、cmlA8、Lactobacillus reuteri cat-TC、cat…	208506	199
Peptide	Brucella suis mprF、MCR-3.6、MCR-1.1、MCR-3.4、bcrA、rosA、Bacillus subtilis mprF、eptA、YojI、ICR-Mo、MCR-9.1、bcrB、MCR-5.2、PmrF、MCR-2.2、MCR-4.5、arnA、bcrC、Streptococcus agalactiae mprF、MCR-4.2、MCR-7.1、tsnR、ugd、Listeria monocytogenes mprF、MCR-8.1、Clostridium perfringens mprF、pgpB、MCR-4.3、MCR-4.4、bacA、rosB、basS	762338	1165
Fluoroquinolone	QepA4、patA、emrA、QepA1、QnrB10、Acinetobacter baumannii AbaQ、QnrS7、mfpA、QepA2、lfrA、patB、QnrD1、pmrA、QnrS1、QnrVC5、emrB、Staphylococcus aureus norA	283760	496
Diaminopyrimidine	dfrA3、dfrA12、dfrF、dfrA20、dfrA1、dfrA8、dfrD、dfrA9、dfrA17、dfrK、dfrA27、dfrC、dfrA26、dfrA14、dfrE、dfrG	28718	71
Fosfomycin	Acinetobacter baumannii AbaF、FosA3、FosA2、FosA7、mdtG、Staphylococcus aureus FosB、FosA5、FosA6、FosA、FosX、Chlamydia trachomatis intrinsic murA conferring resistance to fosfomycin、FosD、FosB3	156976	170
Rifamycin	arr-5、rphA、rphB、arr-1、arr-3、iri	43536	29
Fusidic acid	fusD、fusC、fusB、FusF	5026	25
Nucleoside	SAT-2、SAT-3、tmrB、SAT-4	2684	13
Sulfonamide	sul1、sul4、sul3、sul2	46850	59
Triclosan	TriB、TriA、TriC、OpmH	21466	18
Mupirocin	Staphylococcus mupB conferring resistance to mupirocin、Staphylococcus mupA conferring resistance to mupirocin、Bifidobacterium ileS conferring resistance to mupirocin	169114	204
Aminocoumarin	Streptomyces rishiriensis parY mutant conferring resistance to aminocoumarin、novA	204654	392
Bicyclomycin	bcr-1	37880	30
Elfamycin	facT	2236	7
Pleuromutilin	TaeA	142998	203

## Sheet: Table S2. Developmental stage-d
Group	Number	Name	Antibiotic class
M	ARO:3000498	ErmF	MLS
	ARO:3000578	CcrA	Beta-lactam
	ARO:3000782	adeK	Multidrug
	ARO:3004665	cmlA8	Phenicol
	ARO:3001265	Erm(30)	MLS
	ARO:3004292	Laribacter hongkongensis ampC beta-lactamase	Beta-lactam
	ARO:3002954	vanXO	Glycopeptide
	ARO:3000805	OprN	Multidrug
	ARO:3000183	tet(Z)	Tetracycline
	ARO:3000753	abeM	Multidrug
	ARO:3003007	bmr	Multidrug
	ARO:3004692	aadA10	Aminoglycoside
	ARO:3000444	rphA	Rifamycin
	ARO:3004660	catB11	Phenicol
	ARO:3000621	PC1 beta-lactamase (blaZ)	Beta-lactam
FM	ARO:3004739	ARL-6	Beta-lactam
	ARO:3002837	lnuC	MLS
	ARO:3001828	ACT-23	Beta-lactam
	ARO:3001805	OXA-198	Beta-lactam
	ARO:3002804	FosA2	Fosfomycin
	ARO:3002389	OXY-1-1	Beta-lactam
	ARO:3003633	OXA-476	Beta-lactam
	ARO:3002398	OXY-2-3	Beta-lactam
	ARO:3004844	LEN-41	Beta-lactam
	ARO:3002982	amrA	Multidrug
FE	ARO:3004502	MCR-2.2	Peptide

## Sheet: Table S5. Diversity and composi
Group	Name	Antibiotic class
M	furA	Fe
	pbrR	Pb
	golT	Cu,Au
	mdrL/yfmO	Zn,Cr
	corS	Zn,Cr,Cu
	chrI	Cr
	merB	Hg
	cueA	Cu,Ag
	hupE	Ni
	cutO	Cu
	ycnJ	Cu
FM	aioS/aoxS	As
	ncrC	Ni
	ziaR	Zn

## Sheet: Table S6. Diversity and composi
Group	Name	Antibiotic class
M	vmeA	BAC,Acriflavine,Rhodamine 6G,Crystal Violet,Ethidium Bromide,SDS,SDC
	vmeD	Sodium Glycocholate,Sodium Taurocholate,SDC,Sodium Cholate,SDS,Rhodamine 6G,BAC,Chlorhexidine,Ethidium Bromide,Acriflavine,TPP,Hoechst 33342
	tbtR	Uncommented
	adeA	Pyronin Y,SDS,Acriflavine,BAC,Chlorhexidine,DAPI,SDC, Ethidium Bromide,Methyl Viologen,TPP,Rhodamine 123,Synergize,Wex-cide-128
	farB	Phenylmercury Acetate,CCCP,Oleic acid,Linoleic acid,Palmitic acid,Triton X-100
	mdrL/yfmO	Cobalt,Ethidium Bromide,BAC
	ttgT	Toluene,Styrene
FM	vmeP	SDS,Sodium Cholate,SDC,Sodium Glycocholate
	qacG	BAC,Ethidium Bromide

## Sheet: Table S3. Diversity and distrib
MGEs	MGE_type	Total_reads	Gene_Count	Prevalence	Percent
tyrosine_type_site-specific_recombinase	recombinase	27092	2	0.61538	0.0023
tyrosine_recombinase/integrase_IntP(plasmid)	integrase	58	1	0.38462	4.91704e-6
tyrosine_recombinase(plasmid)	recombinase	222	1	0.30769	2.0E-5
tyrosine	recombinase	31400	21	1	0.00266
truncated(plasmid)	transposase	126	1	0.23077	1.0E-5
transposon_protein	transposon	3526	7	0.76923	0.0003
transposon_excisionase_Tn916_ORF1-like	transposon	288	5	0.69231	2.0E-5
transposon_Tn3_transposase(plasmid)	transposase	2382	2	0.76923	0.0002
transposon_Tn21_modulator_protein(plasmid)	transposon	314	6	0.61538	3.0E-5
transposon_DNA-invertase	transposon	2256	8	0.46154	0.00019
transposon-related_protein	transposon	5200	20	0.84615	0.00044
transposase_subunit_B(plasmid)	transposase	62	1	0.15385	1.0E-5
transposase_subunit_2(plasmid)	transposase	4570	3	0.53846	0.00039
transposase_subunit(plasmid)	transposase	12	1	0.15385	1.01732e-6
transposase_of_IS26(plasmid)	transposase	152	3	0.15385	1.0E-5
transposase_for_transposon_gamma-delta(plasmid)	transposase	92	1	0.15385	1.0E-5
transposase_for_insertion_sequence_element_IS5(plasmid)	transposase	30	1	0.07692	2.54330e-6
transposase_for_IS431mec(plasmid)	transposase	38	1	0.30769	3.22151e-6
transposase_and_inactivated_derivatives(plasmid)	transposase	1340	1	0.92308	0.00011
transposase_ORF_B(IS3_family)	transposase	3340	3	0.53846	0.00028
transposase_ORF_A(plasmid_ISEc8_fragment)	transposase	86	1	0.30769	1.0E-5
transposase_A_of_ISLL6(plasmid)	transposase	6	1	0.07692	5.08659e-7
transposase_31(plasmid)	transposase	878	3	0.15385	7.0E-5
transposase_1(plasmid)	transposase	4328	1	1	0.00037
transposase-like_protein_B(plasmid)	transposase	368	1	0.15385	3.0E-5
transposase(plasmid)	transposase	54152	77	1	0.00459
transposase	transposase	3916190	6235	1	0.332
traSA_integrase_fusion_protein	integrase	8354	12	0.84615	0.00071
site-specific_recombinase	recombinase	1978	14	0.61538	0.00017
site-specific_integrase	integrase	336864	889	1	0.02856
serinr_type_site-specific_recombinase_Mpi	recombinase	6358	1	0.69231	0.00054
serine_type(site-specific)	recombinase	9730	6	0.92308	0.00082
serine_recombinase	recombinase	9408	35	1	0.0008
resolvase-recombinase	recombinase	16	1	0.15385	1.35642e-6
resolvase(site-specific)	recombinase	770	8	0.61538	7.0E-5
recombinase_exo_from_ICE	recombinase	6	1	0.15385	5.08659e-7
recombinase_D	recombinase	32572	84	0.92308	0.00276
recombinase_A	recombinase	3634	21	0.76923	0.00031
recombinase_(plasmid)	recombinase	17154	8	0.69231	0.00145
recombinase/mobilization_protein	recombinase	2286	9	0.53846	0.00019
recombinase	recombinase	919126	1447	1	0.07792
putative_tyrosine_recombinase/integrase_family_protein_(plasmid)	integrase	42	1	0.07692	3.56061e-6
putative_truncated	transposase	3132	4	0.69231	0.00027
putative_transposase_or_invertase(plasmid)	transposase	192	4	0.46154	2.0E-5
putative_transposase_OrfA	transposase	20	1	0.15385	1.69553e-6
putative_transposase_IS4_(plasmid)	transposase	44	1	0.38462	3.73017e-6
putative_transposase_B(plasmid)	transposase	14	1	0.23077	1.18687e-6
putative_transposase_31_superfamily_protein_(plasmid)	transposase	10966	1	0.23077	0.00093
putative_transposase(plasmid)	transposase	16372	32	0.92308	0.00139
putative_transposase	transposase	580	2	0.38462	5.0E-5
putative_reverse_transcriptase-maturase-transposase_(plasmid)	transposase	34564	17	0.92308	0.00293
putative_resolvase/recombinase_(plasmid)	recombinase	232	3	0.38462	2.0E-5
putative_recombinase/mobilization_protein_(plasmid)	recombinase	114	3	0.46154	1.0E-5
putative_integrase_regulator_R_(plasmid)	integrase	1094	1	0.30769	9.0E-5
putative_conjugative_transposon_protein	conjugative_transfer_protein	3998	10	0.61538	0.00034
putative_conjugative_transposon_membrane_protein	conjugative_transfer_protein	5766	11	0.69231	0.00049
putative_ISRSO11-transposase_orfA_protein	transposase	32	1	0.15385	2.71285e-6
putative_IS602_transposase_OrfA	transposase	1028	1	0.46154	9.0E-5
putatative_recombinase_(plasmid)	recombinase	772	9	0.76923	7.0E-5
possible_truncated_IS431mec_transposase_(plasmid)	transposase	1068	1	0.53846	9.0E-5
phage_site-specific_recombinase	recombinase	264	2	0.61538	2.0E-5
phage_recombinase	recombinase	2400	4	0.61538	0.0002
phage_integrase¨SAM-like_domain_protein	integrase	38	4	0.15385	3.22151e-6
phage_integrase_SAM_domain-containing_protein	integrase	268	8	0.38462	2.0E-5
phage_integrase_(plasmid)	integrase	2	1	0.07692	1.69553e-7
phage_integrase(site-specific)	integrase	11692	20	0.92308	0.00099
phage_integrase	integrase	18244	39	0.92308	0.00155
phage_family_integrase	integrase	10	1	0.07692	8.47765e-7
p64_in_pYVa127/90_site-specific_recombinase_homologous_to_XerD/IntI_(plasmid)	recombinase	562	2	0.30769	5.0E-5
mutator_type_transposase_(plasmid)	transposase	8	1	0.15385	6.78212e-7
multifunctional_ATP-dependent_DNA_helicase/dsDNA/ssDNA_exonuclease/ssDNA_endonuclease_recombinase_subunit	recombinase	33796	17	1	0.00287
membrane_protei	conjugative_transfer_protein	5410	17	0.76923	0.00046
isochorismatase_transposase	transposase	7894	31	0.84615	0.00067
integron_gene_cassette_protein	integron	4	1	0.07692	3.39106e-7
integron_cassette_protein	integron	214	4	0.23077	2.0E-5
integrase_catalytic_domain_protein_(plasmid)	integrase	22	1	0.15385	1.86508e-6
integrase_(plasmid)	integrase	700	9	0.61538	6.0E-5
integrase(site-specific)	integrase	10826	4	0.92308	0.00092
integrase	integrase	821942	1520	1	0.06968
insertion_sequence_IS91_transposase	transposase	514	2	0.15385	4.0E-5
hypothetical_protein_transposon-related_protein_(plasmid)	transposon	222	6	0.23077	2.0E-5
hypothetical_protein_putative_resolvase_/_recombinase_(plasmid)	recombinase	5838	1	0.84615	0.00049
fused_IS600_integrase_core_domain-containing_protein/HTH-type_transcriptional_regulator	integrase	33734	35	0.92308	0.00286
conserved_protein(conjugate)	transposon	11994	4	0.30769	0.00102
conserved_hypothetical_protein_putative_transposase_(fragment)_(plasmid)	transposase	6	1	0.23077	5.08659e-7
conserved_hypothetical_protein_found_in_conjugate_transposon_TraD	transposon	7508	2	0.30769	0.00064
conjugative_transposon_protein(plasmid)	conjugative_transfer_protein	3776	3	0.84615	0.00032
conjugative_transposon_protein	conjugative_transfer_protein	29510	151	0.92308	0.0025
conjugate_transposon_protein	transposon	42604	11	0.84615	0.00361
bacteriophage_integrase	integrase	16	1	0.15385	1.35642e-6
attP_region_and_P4int_integrase	integrase	1640	1	0.46154	0.00014
antibiotic_resistance_protein	conjugative_transfer_protein	4852	12	0.76923	0.00041
YqaJ_viral	recombinase	7198	22	0.92308	0.00061
YqaJ-like_viral	recombinase	8758	25	0.84615	0.00074
XerS(tyrosine)	recombinase	1742	14	0.69231	0.00015
XerD(tyrosine)	recombinase	1050	5	0.76923	9.0E-5
XerD(site-specific_tyrosine)	recombinase	32838	100	1	0.00278
XerD(site-specific)	recombinase	678	4	0.30769	6.0E-5
XerD	recombinase	41918	73	1	0.00355
XerC_subunit(tyrosine)	recombinase	2	1	0.07692	1.69553e-7
XerC(tyrosine)	recombinase	47134	59	1	0.004
XerC	recombinase	18788	84	0.92308	0.00159
VanZ-like_transposon_protein	transposon	5034	28	0.92308	0.00043
Transcriptional_regulator_Cro/CI_family_protein_transposon-related_protein(plasmid)	transposon	790	4	0.46154	7.0E-5
TraN	conjugative_transfer_protein	54006	8	0.84615	0.00458
TraM	conjugative_transfer_protein	77696	16	1	0.00659
TraK	conjugative_transfer_protein	28084	5	0.76923	0.00238
TraJ	conjugative_transfer_protein	29768	4	0.61538	0.00252
TraG(ATPase)	conjugative_transfer_protein	85002	20	1	0.00721
TraG	conjugative_transfer_protein	374	2	0.30769	3.0E-5
TnsA_heteromeric(endonuclease_subunit)	transposase	788	16	0.69231	7.0E-5
TnpX(site-specific)	recombinase	18	1	0.23077	1.52598e-6
TnpX	recombinase	12	1	0.15385	1.01732e-6
TnpR(plasmid)	recombinase	16	1	0.15385	1.35642e-6
TnpF(putative_transposon)	transposase	696	2	0.38462	6.0E-5
TnpB(putative_transposon)	transposase	11732	1	0.30769	0.00099
TnpA(plasmid_3'_segment)	transposase	22	1	0.07692	1.86508e-6
Tn7_transposase_B(plasmid)	transposase	2	1	0.07692	1.69553e-7
Tn3-like_element_TnEc1_family_transposase	transposase	416	3	0.46154	4.0E-5
Tn3-like_element_TnAs1_family_transposase	transposase	1356	2	0.69231	0.00011
Tn3-like_element_ISShfr9_family_transposase	transposase	52	1	0.23077	4.40838e-6
Tn3(plasmid)	transposase	348	3	0.15385	3.0E-5
Tn3	transposase	344396	247	1	0.0292
Sin	recombinase	22	1	0.23077	1.86508e-6
RmuC	recombinase	221638	274	1	0.01879
RecX	recombinase	26142	66	1	0.00222
RecU	recombinase	2334	9	0.76923	0.0002
RecT	recombinase	25648	79	1	0.00217
RecR	recombinase	104308	180	1	0.00884
RecQ	recombinase	119044	147	1	0.01009
RecO	recombinase	2264	2	0.23077	0.00019
RecJ	recombinase	101514	248	1	0.00861
RecG	recombinase	116746	165	1	0.0099
RecF	recombinase	145570	241	1	0.01234
RecD	recombinase	4176	44	0.92308	0.00035
RecB	recombinase	118890	214	1	0.01008
RecA/RadA	recombinase	1636	4	0.38462	0.00014
RecA	recombinase	83946	164	1	0.00712
RdgC	recombinase	23332	15	1	0.00198
RarA	recombinase	111324	190	1	0.00944
Putative_conjugative_transposon_mobilization_protein	conjugative_transfer_protein	45908	6	0.69231	0.00389
Putative(site-specific)	recombinase	422	2	0.30769	4.0E-5
Possible_transposase_fusion_protein	transposase	8492	3	1	0.00072
NinG	recombinase	4560	17	0.76923	0.00039
MULTISPECIES_transposon_DNA-invertase	transposon	36	1	0.15385	3.05195e-6
MULTISPECIES_site-specific_recombinase_resolvase_family	recombinase	14	1	0.07692	1.18687e-6
MULTISPECIES_resolvase/site-specific_recombinase	recombinase	154	3	0.23077	1.0E-5
MULTISPECIES_recombinase_partial	recombinase	200	9	0.69231	2.0E-5
MULTISPECIES_recombinase_RecD	recombinase	19680	11	1	0.00167
MULTISPECIES_recombinase_RarA	recombinase	34	1	0.53846	2.88240e-6
MULTISPECIES_phage_integrase_family_site-specific_recombinase	integrase	2100	1	0.23077	0.00018
MULTISPECIES_cassette_chromosome_recombinase_A	recombinase	278	5	0.23077	2.0E-5
MULTISPECIES_Tn3-like_element_TnShfr1_family_transposase	transposase	34	1	0.15385	2.88240e-6
MULTISPECIES_RecA-like_recombinase_protein	recombinase	3370	3	0.38462	0.00029
IntI1	IntI1	2096	1	0.84615	0.00018
InsA(plasmid)	transposase	6044	3	0.84615	0.00051
ISYps8(IS3-like_element)	transposase	48	1	0.15385	4.06927e-6
ISYen3(IS3-like_element)	transposase	346	1	0.15385	3.0E-5
ISVa15(IS630-like_element)	transposase	12	1	0.07692	1.01732e-6
ISTsp1(IS6-like_element)	transposase	16	1	0.07692	1.35642e-6
ISTet1(ISLre2-like_element)	transposase	12	1	0.30769	1.01732e-6
ISSth1(ISL3-like_element)	transposase	24	1	0.07692	2.03464e-6
ISSsu5(IS1380-like_element)	transposase	212	1	0.38462	2.0E-5
ISSso6(IS110-like_element)	transposase	2	1	0.07692	1.69553e-7
ISSne1(IS256_family)	transposase	72	1	0.15385	1.0E-5
ISSmu5(IS982-like_element)	transposase	8	1	0.07692	6.78212e-7
ISShdy1(IS110-like_element)	transposase	6	1	0.07692	5.08659e-7
ISSfl8(IS110-like_element)	transposase	44	1	0.30769	3.73017e-6
ISSen6(IS200/IS605-like_element)	transposase	5512	1	0.15385	0.00047
ISSen1(IS3-like_element)	transposase	148	2	0.46154	1.0E-5
ISSag12(IS3-like_element)	transposase	46	3	0.07692	3.89972e-6
ISS1S(IS6-like_element)	transposase	502	2	0.23077	4.0E-5
ISRmsp1(IS982-like_element)	transposase	32	2	0.23077	2.71285e-6
ISPsy4	transposase	390	3	0.30769	3.0E-5
ISPssp1(IS3-like_element)	transposase	1340	2	0.38462	0.00011
ISPrsp2(IS982-like_element)	transposase	9554	2	0.46154	0.00081
ISPlu8(IS630_family)	transposase	12	1	0.23077	1.01732e-6
ISNCY	transposase	49076	66	1	0.00416
ISLre2	transposase	1474	13	0.69231	0.00012
ISLla3(IS3-like_element)	transposase	40	3	0.15385	3.39106e-6
ISLjo2(ISL3_family)	transposase	198	2	0.38462	2.0E-5
ISLjo1(IS30-like_element)	transposase	146	1	0.38462	1.0E-5
ISLad2(ISNCY-like_element)	transposase	60	1	0.15385	1.0E-5
ISL3	transposase	84476	174	1	0.00716
ISKpn38(IS3-like_element)	transposase	38	2	0.15385	3.22151e-6
ISKpn37(IS3-like_element)	transposase	1222	2	0.38462	0.0001
ISKpn21(ISNCY-like_element)	transposase	60	4	0.15385	1.0E-5
ISKpn20(IS3-like_element)	transposase	16	2	0.07692	1.35642e-6
ISKpn19(ISKra4-like_element)	transposase	15192	2	0.84615	0.00129
ISKpn1(IS3-like_element)	transposase	104	2	0.15385	1.0E-5
ISKox3(ISL3-like_element)	transposase	368	3	0.15385	3.0E-5
ISI400	transposase	44	1	0.23077	3.73017e-6
ISGlo3(IS481-like_element)	transposase	16	1	0.15385	1.35642e-6
ISErh2(IS30-like_element)	transposase	164	3	0.23077	1.0E-5
ISEfa8(IS3-like_element)	transposase	580	5	0.53846	5.0E-5
ISEfa12(IS1182-like_element)	transposase	32	3	0.30769	2.71285e-6
ISEfa11(ISL3-like_element)	transposase	218	2	0.53846	2.0E-5
ISEf1(IS256-like_element)	transposase	2078	1	0.38462	0.00018
ISEcB1(IS3-like_element)	transposase	76	2	0.30769	1.0E-5
ISEc68(IS5-like_element)	transposase	156	1	0.15385	1.0E-5
ISEc51(ISKra4-like_element)	transposase	4	1	0.07692	3.39106e-7
ISEc49(IS66-like_element)	transposase	104	3	0.23077	1.0E-5
ISEc46(IS200/IS605-like_element)	transposase	590	2	0.61538	5.0E-5
ISEc45(IS110-like_element)	transposase	722	3	0.61538	6.0E-5
ISEc43(IS66-like_element)	transposase	492	2	0.84615	4.0E-5
ISEc41(IS200/IS605-like_element)	transposase	50	1	0.15385	4.23883e-6
ISEc40(IS630-like_element)	transposase	1554	5	0.30769	0.00013
ISEc35(IS5-like_element)	transposase	266	3	0.07692	2.0E-5
ISEc33(IS630-like_element)	transposase	1224	3	0.53846	0.0001
ISEc26(ISAs1-like_element)	transposase	12010	1	0.92308	0.00102
ISEc18(IS481-like_element)	transposase	360	3	0.30769	3.0E-5
ISEc12(IS21-like_element)	transposase	5314	1	0.38462	0.00045
ISEc10(IS21-like_element)	transposase	3326	2	0.69231	0.00028
ISEal1(IS3-like_element)	transposase	132	1	0.15385	1.0E-5
ISDsh1(IS3_family)	transposase	12	1	0.07692	1.01732e-6
ISCsa1(ISL3_family)	transposase	38	1	0.23077	3.22151e-6
ISCro4(IS110_family)	transposase	12	1	0.30769	1.01732e-6
ISCpe3(IS256_family)	transposase	286	2	0.23077	2.0E-5
ISClte3(IS6_family)	transposase	104	2	0.30769	1.0E-5
ISClsp6(IS1595_family)	transposase	272	3	0.61538	2.0E-5
ISCfr1	transposase	76	1	0.38462	1.0E-5
ISCaje6(IS1595-like_element)	transposase	6	2	0.15385	5.08659e-7
ISBt2(IS3-like_element)	transposase	122	1	0.46154	1.0E-5
ISBf2(IS21-like_element)	transposase	9476	1	0.46154	0.0008
ISAs18(IS4-like_element)	transposase	2	1	0.07692	1.69553e-7
ISAs1	transposase	56922	23	1	0.00483
ISApu2(IS4-like_element)	transposase	114	1	0.07692	1.0E-5
ISApl1(IS30-like_element)	transposase	14	1	0.07692	1.18687e-6
ISAeme16(IS630_family)	transposase	28	1	0.07692	2.37374e-6
ISAco1(IS1182-like_element)	transposase	4	1	0.07692	3.39106e-7
ISAba21(IS3-like_element)	transposase	12	1	0.15385	1.01732e-6
ISAba14(IS3_family)	transposase	480	1	0.30769	4.0E-5
ISAba125(IS30-like_element)	transposase	114	1	0.38462	1.0E-5
IS982	transposase	37448	35	1	0.00317
IS981(IS3-like_element)	transposase	112	1	0.15385	1.0E-5
IS91(plasmid_fragment)	transposase	36	1	0.15385	3.05195e-6
IS91	transposase	20014	47	1	0.0017
IS903B(IS5-like_element)	transposase	20176	2	0.53846	0.00171
IS712(IS21-like_element)	transposase	64	1	0.15385	1.0E-5
IS6770(IS30-like_element)	transposase	1692	1	0.38462	0.00014
IS66	transposase	196240	234	1	0.01664
IS630	transposase	213514	773	1	0.0181
IS621(IS110-like_element)	transposase	99388	1	1	0.00843
IS607	transposase	13962	65	0.92308	0.00118
IS605	transposase	58376	84	1	0.00495
IS6	transposase	112388	68	1	0.00953
IS5708(IS110-like_element)	transposase	284	1	0.15385	2.0E-5
IS5564(IS481-like_element)	transposase	516	18	0.84615	4.0E-5
IS5075(IS110-like_element)	transposase	1116	1	0.15385	9.0E-5
IS50	transposase	300	1	0.23077	3.0E-5
IS5/IS1182	transposase	181052	184	1	0.01535
IS5	transposase	960	10	0.76923	8.0E-5
IS481	transposase	15188	61	1	0.00129
IS4/IS5	transposase	4034	21	0.84615	0.00034
IS4	transposase	56300	52	1	0.00477
IS30	transposase	42784	162	0.92308	0.00363
IS3(IS3-like_element)	transposase	46470	1	1	0.00394
IS3	transposase	547906	891	1	0.04645
IS256	transposase	153814	183	1	0.01304
IS21	transposase	5838	24	0.92308	0.00049
IS204	transposase	82	1	0.15385	1.0E-5
IS200/IS605	transposase	42968	113	1	0.00364
IS1N	transposase	982	1	0.46154	8.0E-5
IS186	transposase	2746	1	0.46154	0.00023
IS1678(IS1380-like_element)	transposase	132	1	0.15385	1.0E-5
IS1634	transposase	54	1	0.07692	4.57793e-6
IS1595	transposase	2680	16	0.76923	0.00023
IS1542(IS256-like_element)	transposase	524	1	0.30769	4.0E-5
IS1520(IS3-like_element)	transposase	6	1	0.07692	5.08659e-7
IS150(IS3-like_element)	transposase	6612	1	0.84615	0.00056
IS1469	transposase	92	1	0.53846	1.0E-5
IS1381	transposase	18	1	0.23077	1.52598e-6
IS1380	transposase	386424	649	1	0.03276
IS1294_transposase(plasmid)	transposase	340	1	0.15385	3.0E-5
IS1252(IS30-like_element)	transposase	88	1	0.15385	1.0E-5
IS1182	transposase	25692	16	0.61538	0.00218
IS116/IS110/IS902_family_protein	transposase	13650	23	0.92308	0.00116
IS116/IS110/IS902(plasmid)	transposase	520	1	0.53846	4.0E-5
IS1151	transposase	130	1	0.23077	1.0E-5
IS1133(IS3-like_element)	transposase	15434	2	0.23077	0.00131
IS110	transposase	368416	507	1	0.03123
IS100(IS21-like_element)	transposase	6948	1	0.76923	0.00059
IS1	transposase	59768	24	1	0.00507
Hin_recombinase	recombinase	17022	9	0.84615	0.00144
Gifsy-2_prophage_putative_RecA/RadA_recombinase	recombinase	2760	4	1	0.00023
DNA_recombinase_recG	recombinase	42	1	0.15385	3.56061e-6
DNA_recombinase_RecA	recombinase	80	1	0.23077	1.0E-5
DNA_recombinase(site-specific)	recombinase	3114	14	0.69231	0.00026
DNA_recombinase	recombinase	48650	107	1	0.00412
DNA_invertase_Pin(site-specific)	recombinase	88	2	0.23077	1.0E-5
DNA_integrase_IntI1	integrase	402	1	0.07692	3.0E-5
DNA-invertase_(site_specific_recombinase)_from_prophage	recombinase	272	2	0.38462	2.0E-5
DDE	transposase	23998	56	1	0.00203
Conjugative_relaxosome_accessory_transposon_protein	transposon	10056	11	0.92308	0.00085
CPZ-55_prophage_putative_phage_integrase	integrase	8292	2	0.61538	0.0007
CP4-6_prophage_putative_phage_integrase	integrase	72	4	0.15385	1.0E-5
C-terminal_part(plasmid)	transposase	364	1	0.53846	3.0E-5
ArdA_antirestriction_family_protein	conjugative_transfer_protein	1842	7	0.69231	0.00016

## Sheet: Table S4. Metal and biocide res
BMRG	Compund	BacMet Class	NCBI_annotation	Total_reads	Gene_Count	Prevalence	Percent
zur/yjbK	Zn	Metal	transcriptional regulator Zur ; Zinc uptake regulation protein ZUR ; MULTISPECIES: transcriptional regulator Zur	5824	9	0.92308	0.00037
zupT/ygiE	Zn,Fe,Co,Ni,Cu,Cd	Metal	MULTISPECIES: zinc transporter ZupT ; zinc transporter ZupT	45846	29	1	0.00291
zraS/hydG	Zn,Pb	Metal	two-component system sensor histidine kinase ZraS ; MULTISPECIES: two-component system sensor histidine kinase ZraS	97010	42	1	0.00616
zraR/hydH	Zn	Metal	two-component system response regulator ZraR ; MULTISPECIES: sigma-54-dependent Fis family transcriptional regulator ; DNA-binding response regulator ; MULTISPECIES: DNA-binding response regulator ; sigma-54-dependent Fis family transcriptional regulator	270150	212	1	0.01715
zraP	Zn	Metal	zinc resistance-associated protein ZraP ; MULTISPECIES: zinc resistance-associated protein ZraP ; zinc resistance-associated protein	10914	5	0.84615	0.00069
znuC/yebM	Zn	Metal	zinc import ATP-binding protein ZnuC ; zinc ABC transporter ATP-binding protein ZnuC ; MULTISPECIES: zinc ABC transporter ATP-binding protein ZnuC ; MULTISPECIES: Mn2+/Zn2+ABC transporter ATP-binding protein	197210	310	1	0.01252
znuB/yebI	Zn	Metal	MULTISPECIES: zinc ABC transporter permease ; high-affinity zinc transporter membrane component ; zinc ABC transporter permease	21342	29	0.92308	0.00135
znuA/yebL	Zn	Metal	high-affinity zinc uptake system periplasmic protein ; zinc ABC transporter substrate-binding protein, partial ; MULTISPECIES: zinc ABC transporter substrate-binding protein ; periplasmic solute binding protein ; zinc ABC transporter substrate-binding protein ; zinc transporter subunit: periplasmic-binding component of ABC superfamily ; high-affinity zinc uptake system protein ZnuA	21150	16	1	0.00134
zntR/YhdM	Zn	Metal	Zn(II)-responsive transcriptional regulator ; MULTISPECIES: Zn(2+)-responsive transcriptional regulator ; Zn(2+)-responsive transcriptional regulator	9530	45	1	0.0006
zntA/yhhO	Pb,Cd,Zn	Metal	MULTISPECIES: zinc/cadmium/mercury/lead-transporting ATPase ; zinc/cadmium/mercury/lead-transporting ATPase	27306	25	0.92308	0.00173
zitB/ybgR	Zn	Metal	zinc transporter ZitB ; MULTISPECIES: zinc transporter ZitB ; cation transporter	38118	28	1	0.00242
zipB	Zn,Cd	Metal	ZIP family metal transporter ; MULTISPECIES: ZIP family metal transporter	5318	32	0.76923	0.00034
zinT/yodA	Cd,Zn	Metal	zinc/cadmium-binding protein ; metal-binding protein ZinT ; MULTISPECIES: metal-binding protein ZinT ; YodA domain protein	23210	40	1	0.00147
ziaA	Zn	Metal	heavy metal translocating P-type ATPase ; hypothetical protein APF79_02740 ; Zinc-transporting ATPase (translocating P-type) (EC 3.6.3.5) ; cadmium-translocating P-type ATPase ; Cd2+/Zn2+-exporting ATPase ; ATPase ; heavy metal-translocating P-type ATPase, Cd/Co/Hg/Pb/Zn-transporting ; MULTISPECIES: cadmium-translocating P-type ATPase ; P type ATPase BXA1 ; cadmium transporter	28046	92	0.92308	0.00178
zevB	Zn	Metal	nickel/cobalt transporter ; cobalt transporter	6038	11	0.92308	0.00038
zevA	Zn	Metal	DUF1007 domain-containing protein ; predicted ABC-type transport system, periplasmic component	4178	7	0.92308	0.00027
yqjH	Fe,Ni	Metal	siderophore interacting protein ; siderophore-interacting protein ; MULTISPECIES: siderophore-interacting protein ; NADPH-dependent ferric siderophore reductase	6242	20	1	0.0004
yodD	Cd,H2O2,HCl	Metal;Biocide	hypothetical protein HMPREF3212_02320 ; DUF2525 domain-containing protein ; MULTISPECIES: DUF2525 domain-containing protein	3246	7	0.84615	0.00021
ymgB/ariR	HCl,H2O2	Biocide	MULTISPECIES: two-component-system connector protein AriR ; two-component-system connector protein AriR	3606	7	0.92308	0.00023
ykkD	Ethidium Bromide,Crystal Violet,Methyl Viologen	Biocide	MULTISPECIES: QacE family quaternary ammonium compound efflux SMR transporter ; QacE family quaternary ammonium compound efflux SMR transporter	8022	25	0.76923	0.00051
ykkC	Ethidium Bromide,Crystal Violet,Methyl Viologen	Biocide	MULTISPECIES: QacE family quaternary ammonium compound efflux SMR transporter ; QacE family quaternary ammonium compound efflux SMR transporter ; multidrug resistance protein SMR	5698	17	0.69231	0.00036
yjaA	Cd,H2O2,HCl	Metal;Biocide	MULTISPECIES: hypothetical protein	840	1	0.46154	5.0E-5
yieF	Cr,V,Mo,Methylene Blue	Metal;Biocide	NAD(P)H-dependent oxidoreductase ; MULTISPECIES: NAD(P)H-dependent oxidoreductase	16574	13	1	0.00105
yhcN	Cd,H2O2,HCl	Metal;Biocide	DUF1471 domain-containing protein ; MULTISPECIES: DUF1471 domain-containing protein	13328	22	1	0.00085
ygiW	Cd,TBT,H2O2	Metal;Biocide	MULTISPECIES: TIGR00156 family protein ; hypothetical protein ; TIGR00156 family protein	8786	9	1	0.00056
yfmP	Cu	Metal	MULTISPECIES: MerR family transcriptional regulator ; transcriptional regulator ; MerR family transcriptional regulator	2278	9	0.69231	0.00014
yfmO	Cu	Metal	MULTISPECIES: MFS transporter ; MFS transporter	892	6	0.53846	6.0E-5
yfeD	Fe,Mn	Metal	unnamed protein product ; metal ABC transporter permease ; MULTISPECIES: metal ABC transporter permease ; iron ABC transporter permease	29346	52	0.92308	0.00186
yfeC	Fe,Mn	Metal	metal ABC transporter permease ; hypothetical protein	2468	11	0.92308	0.00016
yfeB	Fe,Mn	Metal	iron ABC transporter permease ; ABC transporter family protein ; iron ABC transporter ATP-binding protein ; Manganese ABC transporter ATP-binding protein SitB ; MULTISPECIES: iron ABC transporter permease ; hypothetical protein BMY_0475	67810	234	1	0.0043
yfeA	Fe,Mn	Metal	metal ABC transporter substrate-binding protein ; putative periplasmic iron-binding protein precursor ; MULTISPECIES: metal ABC transporter substrate-binding protein ; iron-binding protein	21994	49	1	0.0014
ydeP	HCl	Biocide	MULTISPECIES: oxidoreductase ; oxidoreductase ; MULTISPECIES: hypothetical protein ; hypothetical protein	32638	31	1	0.00207
ydeO	HCl,Rhodamine 6G,SDS	Biocide	MULTISPECIES: AraC family transcriptional regulator ; AraC family transcriptional regulator ; transcriptional regulator YdeO	15624	10	1	0.00099
ydeI	H2O2	Biocide	MULTISPECIES: TIGR00156 family protein ; periplasmic protein	6606	5	0.92308	0.00042
yddG/emrE	Methyl Viologen	Biocide	Permease of the drug/metabolite transporter(DMT)superfamily ; drug/metabolite DMT transporter permease ; MULTISPECIES: drug/metabolite DMT transporter permease	17050	15	1	0.00108
ycnK	Cu	Metal	MULTISPECIES: transcriptional regulator ; DeoR/GlpR transcriptional regulator ; transcriptional regulator, DeoR family ; MULTISPECIES: hypothetical protein ; hypothetical protein ; transcriptional regulator ; DNA-binding transcriptional regulator ; MULTISPECIES: DeoR/GlpR transcriptional regulator	38894	53	1	0.00247
ycnJ	Cu	Metal	copper-binding protein	58	1	0.07692	3.68182e-6
ychH	Cd,H2O2	Metal;Biocide	MULTISPECIES: membrane protein ; MULTISPECIES: hypothetical protein ; hypothetical protein	4492	8	0.92308	0.00029
ybtQ	Fe	Metal	MULTISPECIES: ABC transporter ATP-binding protein ; ABC transporter ATP-binding protein/permease ; ABC transporter ATP-binding protein ; ABC transporter permease ; ABC transporter ATP-binding protein, partial	48314	126	1	0.00307
ybtP	Fe	Metal	ABC transporter transmembrane region family protein ; putative inner membrane ABC-transporter ; hypothetical protein L388_02490 ; Xenobiotic-transporting ATPase ; MULTISPECIES: ABC transporter ATP-binding protein ; ABC transporter ATP-binding protein	109574	181	1	0.00696
wtpC	W,Mo	Metal	molybdenum ABC transporter ATP-binding protein ; ABC transporter ATP-binding protein ;WTPC_THEKO RecName: Full=Molybdate/tungstate import ATP-binding protein WtpC	332562	649	1	0.02111
wtpB	W,Mo	Metal	molybdenum ABC transporter permease	17814	11	0.92308	0.00113
wtpA	W,Mo	Metal	putative molybdate/tungstate ABC transporter substrate binding protein ; molybdate/tungstate transport system substrate-binding protein	614	9	0.76923	4.0E-5
vpoC	BAC,Chlorhexidine,Ethidium Bromide,Rhodamine 6G,Acriflavine,TPP,Hoechst 33342,SDS,Sodium Cholate,SDC,Sodium Glycocholate	Biocide	outer membrane channel protein TolC	14972	11	0.92308	0.00095
vmrA	DAPI,Acriflavine,Ethidium Bromide,TPP	Biocide	multidrug efflux protein ; multidrug efflux protein, partial	1934	20	0.84615	0.00012
vmeY	Sodium Glycocholate,Sodium Taurocholate,SDC,Sodium Cholate,SDS	Biocide	RND efflux system membrane fusion protein CmeA ; membrane-fusion protein ; MexE family multidrug efflux RND transporter periplasmic adaptor subunit	4470	4	0.84615	0.00028
vmeV	SDS,Sodium Cholate,SDC,Sodium Glycocholate,Ethidium Bromide,BAC,Chlorhexidine,Acriflavine,TPP	Biocide	AcrB/AcrD/AcrF family protein	10466	4	0.92308	0.00066
vmeU	SDS,Sodium Cholate,SDC,Sodium Glycocholate,Ethidium Bromide,BAC,Chlorhexidine,Acriflavine,TPP	Biocide	hypothetical protein ACX03_13720	46	1	0.15385	2.92007e-6
vmeT	SDS,Sodium Cholate,SDC,Sodium Glycocholate,Ethidium Bromide,BAC,Chlorhexidine,Acriflavine,TPP	Biocide	efflux transporter periplasmic adaptor subunit ; acriflavin resistance protein ; efflux RND transporter periplasmic adaptor subunit ; efflux transporter, RND family, MFP subunit	18138	6	0.92308	0.00115
vmeP	SDS,Sodium Cholate,SDC,Sodium Glycocholate	Biocide	efflux RND transporter periplasmic adaptor subunit	12	2	0.15385	7.61757e-7
vmeJ	Ethidium Bromide,Rhodamine 6G	Biocide	efflux RND transporter periplasmic adaptor subunit	21256	3	0.76923	0.00135
vmeI	SDS,Sodium Cholate,SDC,Sodium Glycocholate,Ethidium Bromide,BAC,Chlorhexidine	Biocide	AcrB/AcrD/AcrF family protein ; Multidrug efflux pump subunit AcrB	17470	15	0.92308	0.00111
vmeG	SDS,Sodium Cholate,SDC,Sodium Glycocholate,Ethidium Bromide,BAC,Chlorhexidine	Biocide	efflux RND transporter periplasmic adaptor subunit	296	1	0.38462	2.0E-5
vmeF	Ethidium Bromide,SDS,Sodium Cholate,SDC,Sodium Glycocholate,Acriflavine	Biocide	AcrB/AcrD/AcrF family protein ; multidrug transporter AcrB	23214	6	0.92308	0.00147
vmeD	Sodium Glycocholate,Sodium Taurocholate,SDC,Sodium Cholate,SDS,Rhodamine 6G,BAC,Chlorhexidine,Ethidium Bromide,Acriflavine,TPP,Hoechst 33342	Biocide	transporter	3716	1	0.15385	0.00024
vmeC	Sodium Glycocholate,Sodium Taurocholate,SDC,Sodium Cholate,SDS,Rhodamine 6G,BAC,Chlorhexidine,Ethidium Bromide,Acriflavine,TPP,Hoechst 33342	Biocide	efflux RND transporter periplasmic adaptor subunit ; MULTISPECIES: efflux RND transporter periplasmic adaptor subunit ; MULTISPECIES: MexH family multidrug efflux RND transporter periplasmic adaptor subunit ; MexH family multidrug efflux RND transporter periplasmic adaptor subunit	22108	9	0.84615	0.0014
vmeA	BAC,Acriflavine,Rhodamine 6G,Crystal Violet,Ethidium Bromide,SDS,SDC	Biocide	efflux RND transporter periplasmic adaptor subunit	5406	1	0.30769	0.00034
vexH	Triton X-100,Sodium Cholate,SDC	Biocide	AcrB/AcrD/AcrF family protein ; multidrug transporter AcrB	13192	8	0.84615	0.00084
vexF	Ethidium Bromide	Biocide	AcrB/AcrD/AcrF family protein	356	2	0.84615	2.0E-5
vexD	Ethidium Bromide	Biocide	AcrB/AcrD/AcrF family protein	11598	5	0.84615	0.00074
vexC	Ethidium Bromide	Biocide	efflux RND transporter periplasmic adaptor subunit	30710	5	0.76923	0.00195
vcrM	Acriflavine,DAPI,Hoechst 33342,Rhodamine 6G,TPP,Ethidium Bromide	Biocide	multi antimicrobial extrusion protein ; multidrug efflux protein ; MULTISPECIES: MATE family efflux transporter ; MATE family efflux transporter ; multidrug transporter MatE ; multidrug transporter	81400	212	1	0.00517
vcmA	Ethidium Bromide,DAPI,Hoechst 33342,Acriflavine	Biocide	MULTISPECIES: MATE family efflux transporter ; MATE family efflux transporter	1556	5	0.69231	0.0001
vceR	SDC	Biocide	TetR/AcrR family transcriptional regulator ; MULTISPECIES: TetR/AcrR family transcriptional regulator	232	4	0.38462	1.0E-5
vceC	SDC	Biocide	multidrug transporter	20	1	0.30769	1.26959e-6
vceB	SDC	Biocide	MFS transporter, partial ; MULTISPECIES: MFS transporter ; multidrug resistance protein B ; MFS transporter	53776	76	1	0.00341
vceA	SDC	Biocide	MULTISPECIES: hemolysin D ; Membrane fusion component of tripartite multidrug resistance system, partial ; hemolysin D ; efflux transporter periplasmic adaptor subunit ; HlyD family secretion protein ; EmrA/EmrK family multidrug efflux transporter periplasmic adaptor subunit ; multidrug resistance protein VceA	6598	18	0.84615	0.00042
vcaM	Ethidium Bromide,Rhodamine 6G,DAPI,TPP,Acridine Orange	Biocide	ABC-type multidrug efflux pump ; ABC transporter transmembrane region family protein ; multidrug ABC transporter ATP-binding protein ; ABC transporter ATP-binding protein, partial ; ABC transporter, ATP-binding protein ; lipid A export ATP-binding/permease protein MsbA ; MULTISPECIES: ABC transporter ATP-binding protein ; ABC transporter ATP-binding protein ; ATP-binding cassette, subfamily B, mu…	199608	556	1	0.01267
tupC	W	Metal	hypothetical protein A2Y23_14965 ; hypothetical protein AUK29_09585 ; ABC transporter ; ATPase component of tungstate ABC transporter ; hypothetical protein ; hypothetical protein APF77_06860 ; Methionine import ATP-binding protein MetN ; phosphate ABC transporter ATP-binding protein ; MULTISPECIES: ABC transporter ATP-binding protein ; hypothetical protein AKG39_04435 ; ABC transporter ATP-bindi…	550766	1207	1	0.03496
tupB	W	Metal	ABC transporter permease	296	2	0.38462	2.0E-5
tupA	W	Metal	tungsten ABC transporter substrate-binding protein	344	3	0.46154	2.0E-5
tunR	W,Mo	Metal	hypothetical protein AUJ49_13475 ; integrase	386	3	0.53846	2.0E-5
ttgV	Toluene,Styrene	Biocide	IclR family transcriptional regulator	16462	2	1	0.00105
ttgT	Toluene,Styrene	Biocide	transcriptional regulator	168	1	0.23077	1.0E-5
ttgR	n-hexane,Toluene,Dimethylphthalate,Styrene,m-xylene,Ethylbenzene,Propylbenzene	Biocide	TetR family transcriptional regulator ; MULTISPECIES: TetR family transcriptional regulator ; Regulatory protein, TetR	1718	11	0.61538	0.00011
ttgG	Toluene,Styrene,m-xylene,Ethylbenzene,Propylbenzene	Biocide	efflux RND transporter periplasmic adaptor subunit	16	1	0.23077	1.01568e-6
ttgE	Toluene,Styrene	Biocide	multidrug efflux RND transporter permease subunit ; MULTISPECIES: multidrug efflux RND transporter permease subunit ; multidrug transporter	94	5	0.15385	1.0E-5
troD	Zn,Mn,Fe	Metal	metal ABC transporter permease	214	3	0.46154	1.0E-5
troB	Zn,Mn,Fe	Metal	metal ABC transporter ATP-binding protein ; zinc ABC transporter ATP-binding protein	7460	37	0.84615	0.00047
triC	Triclosan	Biocide	ATPase	3512	13	0.69231	0.00022
triA	Triclosan	Biocide	TriA protein	1784	10	0.76923	0.00011
trgB	Te,Cu	Metal	nudix-type nucleoside diphosphatase, YffH/AdpP family ; tellurium resistance protein ; ADP-ribose pyrophosphatase ; hypothetical protein BMI86_10000 ; hypothetical protein ; NUDIX hydrolase ; MULTISPECIES: hypothetical protein	29692	43	1	0.00188
tolCsm	Acriflavine,CCCP,Crystal Violet,Methyl Viologen,Plumbagin,SDS,TCS,Menadione	Biocide	membrane protein	5780	1	0.61538	0.00037
tolC	Phenol,Triclosan,SDC,Sodium Cholate,Sodium Taurodeoxycholate,SDS,Proflavin,Acriflavine,Ethidium Bromide,TPP,Rhodamine 6G,TPA,CTM,QACs,BAC,Plumbagin	Biocide	outer membrane channel protein TolC ; MULTISPECIES: outer membrane channel protein TolC ; type I secretion outer membrane protein, TolC family	17136	9	1	0.00109
terZ	Te	Metal	MULTISPECIES: tellurium resistance protein TerZ ; tellurium resistance protein TerZ	1770	6	0.84615	0.00011
terW	Te	Metal	tellurium resistance protein TerW ; hypothetical protein	906	4	0.84615	6.0E-5
terE	Te	Metal	chemical-damaging agent resistance protein C ; MULTISPECIES: chemical-damaging agent resistance protein C ; MULTISPECIES: tellurium resistance protein TerE ; MULTISPECIES: tellurite resistance protein	1714	8	0.92308	0.00011
terD	Te	Metal	chemical-damaging agent resistance protein C ; MULTISPECIES: chemical-damaging agent resistance protein C ; tellurium resistance protein TerD ; MULTISPECIES: tellurium resistance protein TerD ;AF168355_6 TerD	4526	35	0.92308	0.00029
terC	Te	Metal	tellurium resistance protein TerC, partial ; tellurium resistance protein TerC ; MULTISPECIES: tellurium resistance protein TerC	21918	19	1	0.00139
terB	Te	Metal	MULTISPECIES: Tellurium resistance protein TerB ; Tellurium resistance protein TerB	1350	3	0.84615	9.0E-5
terA	Te	Metal	MULTISPECIES: tellurium resistance protein TerA ; stress protein ; tellurium resistance protein TerA	1998	10	0.84615	0.00013
tehB	Te,Proflavin	Metal;Biocide	tellurite resistance protein TehB ; tellurite resistance methyltransferase TehB ; MULTISPECIES: tellurite resistance methyltransferase TehB	16188	22	0.92308	0.00103
tehA	Te,Proflavin,TPP,Ethidium Bromide,Crystal Violet,QACs,Methyl Viologen	Metal;Biocide	MULTISPECIES: TDT family transporter ; dicarboxylate transporter/tellurite-resistance protein TehA ; MULTISPECIES: dicarboxylate transporter/tellurite-resistance protein TehA	19692	10	1	0.00125
tcrB	Cu	Metal	copper-translocating P-type ATPase	778	2	0.38462	5.0E-5
tcrA	Cu	Metal	copper-translocating P-type ATPase	300	5	0.61538	2.0E-5
sugE	CTM,CPC,TPP,BAC,Ethidium Bromide,SDS	Biocide	small_Multi_Drug_Res ; multidrug resistance protein, SMR family ; Quaternary ammonium compound-resistance protein ; MULTISPECIES: quaternary ammonium compound-resistance protein SugE ; quaternary ammonium compound-resistance protein SugE	6126	22	1	0.00039
ssmE	Acriflavine,Ethidium Bromide,Methyl Viologen,Chlorhexidine	Biocide	multidrug DMT transporter	812	5	0.84615	5.0E-5
soxS	Zn,Cyclohexane	Metal;Biocide	DNA-binding transcriptional regulator SoxS ; regulatory protein SoxS ; MULTISPECIES: DNA-binding transcriptional regulator SoxS ; helix-turn-helix domain protein ; AraC family transcriptional regulator ; MULTISPECIES: regulatory protein SoxS ; AraC-family transcriptional regulator	36324	39	1	0.00231
soxR	Methyl Viologen	Biocide	redox-sensitive transcriptional activator SoxR	10714	6	1	0.00068
sodB	Se,H2O2	Metal;Biocide	MULTISPECIES: superoxide dismutase ; superoxide dismutase	19678	1	0.92308	0.00125
sodB	H2O2	Metal;Biocide	MULTISPECIES: superoxide dismutase ; superoxide dismutase	19678	9	0.92308	0.00125
sodA	Se,H2O2	Metal;Biocide	Superoxide dismutase ; Manganese superoxide dismutase ; superoxide dismutase ; superoxide dismutase, Mn ; MULTISPECIES: superoxide dismutase ; PREDICTED: superoxide dismutase	45308	67	1	0.00288
smvA/emrB	Methyl Viologen,TPP,Hoechst 33342,Ethidium Bromide,CTM,BAC,Acriflavine	Biocide	methyl viologen resistance protein SmvA ; MULTISPECIES: MFS transporter ; MFS transporter	4472	13	0.53846	0.00028
smtB/ziaR	Zn	Metal	transcriptional regulator ; ArsR family transcriptional regulator ; Transcriptional repressor SmtB ; hypothetical protein A2X88_06080	8656	66	0.92308	0.00055
smrA	Ethidium Bromide,Rhodamine 6G,TPP,DAPI	Biocide	hypothetical protein OsJ_26970 ; ABC transporter ATP-binding protein	45172	44	1	0.00287
smfY	Acriflavine,DAPI,Ethidium Bromide,TPP,Methyl Viologen,BAC	Biocide	Methyl viologen resistance protein SmvA ; MULTISPECIES: MFS transporter ; MFS transporter	3418	25	0.84615	0.00022
smeF	Triclosan,Acriflavine,Rhodamine 6G,Crystal Violet,Ethidium Bromide,Proflavin,SDS	Biocide	transporter	1528	2	0.61538	0.0001
smdB	DAPI,Hoechst 33342	Biocide	Multidrug resistance-like ATP-binding protein MdlB ; multidrug ABC transporter permease/ATP-binding protein ; MULTISPECIES: multidrug ABC transporter permease/ATP-binding protein	96860	151	1	0.00615
smdA	DAPI,Hoechst 33342	Biocide	multidrug ABC transporter permease/ATP-binding protein ; MULTISPECIES: multidrug ABC transporter permease/ATP-binding protein ; putative multidrug resistance ABC transporter ATP-binding/permease protein YheI	91402	134	1	0.0058
sitD	Mn,Fe,H2O2	Metal;Biocide	metal ABC transporter permease ; metal ABC transporter permease, partial	12184	13	0.84615	0.00077
sitC	Mn,Fe,H2O2	Metal;Biocide	metal ABC transporter permease ; MULTISPECIES: metal ABC transporter permease	9894	5	0.92308	0.00063
sitB	Mn,Fe,H2O2	Metal;Biocide	ABC transporter family protein ; MULTISPECIES: manganese/iron transporter ATP-binding protein ; manganese transporter ; manganese/iron transporter ATP-binding protein ; MULTISPECIES: manganese transporter	12262	21	0.92308	0.00078
sitA	Mn,Fe,H2O2	Metal;Biocide	metal ABC transporter substrate-binding protein	11398	8	0.92308	0.00072
silS	Ag	Metal	MULTISPECIES: two-component sensor histidine kinase ; two-component sensor histidine kinase ; sensor histidine kinase ; sensor kinase CusS	4274	25	0.84615	0.00027
silR	Ag	Metal	DNA-binding response regulator ; MULTISPECIES: DNA-binding response regulator	2492	6	0.61538	0.00016
silP	Ag	Metal	copper-translocating P-type ATPase, partial ; silver exporting P-type ATPase, partial ; copper-translocating P-type ATPase ; MULTISPECIES: copper-translocating P-type ATPase	3174	5	0.92308	0.0002
silF	Ag	Metal	MULTISPECIES: copper ABC transporter substrate-binding protein	798	1	0.15385	5.0E-5
silE	Ag	Metal	silver-binding protein silE ; silver-binding protein SilE	1982	2	0.15385	0.00013
silC	Ag	Metal	membrane protein ; cation efflux system protein CusC ; MULTISPECIES: hypothetical protein ; hypothetical protein	3948	5	0.30769	0.00025
silB	Ag	Metal	MULTISPECIES: efflux RND transporter periplasmic adaptor subunit ; efflux RND transporter periplasmic adaptor subunit, partial	2576	2	0.23077	0.00016
silA	Ag	Metal	CusA/CzcA family heavy metal efflux RND transporter ; MULTISPECIES: CusA/CzcA family heavy metal efflux RND transporter ; CusA/CzcA family heavy metal efflux RND transporter, partial ; Cobalt-zinc-cadmium resistance protein CzcA; Cation efflux system protein CusA	6464	12	0.46154	0.00041
sh-fabI	Triclosan	Biocide	MULTISPECIES: enoyl-acyl-carrier-protein; enoyl-acyl-carrier-protein;A Chain A, Crystal Structure Of The Staphylococcus Aureus Enoyl-acyl Carrier Protein Reductase (fabi) In Apo Form (one Molecule In Au)	11520	16	0.84615	0.00073
sdeY	BAC,Chlorhexidine,Triclosan,SDS,Acriflavine,Rhodamine 6G	Biocide	multidrug efflux RND transporter permease subunit ; hydrophobe/amphiphile efflux-1 family RND transporter ; MULTISPECIES: multidrug efflux RND transporter permease subunit ; aminoglycoside/multidrug transporter permease	3964	7	1	0.00025
sdeX	BAC,Chlorhexidine,Triclosan,SDS,Acriflavine,Rhodamine 6G	Biocide	efflux RND transporter periplasmic adaptor subunit ; MexE family multidrug efflux RND transporter periplasmic adaptor subunit ; MULTISPECIES: MexE family multidrug efflux RND transporter periplasmic adaptor subunit	2274	5	1	0.00014
sdeB	SDS,Ethidium Bromide,n-hexane,Chlorhexidine,BAC	Biocide	hydrophobe/amphiphile efflux-1 family RND transporter ; MULTISPECIES: multidrug efflux RND transporter permease subunit	36	2	0.38462	2.28527e-6
ruvB	Cr,Te,Se	Metal;Biocide	malate dehydrogenase, partial ; malic enzyme family protein, partial ; malic enzyme ; ATP-dependent DNA helicase RuvB ; MULTISPECIES: malic enzyme family protein ; MULTISPECIES: malate dehydrogenase ; malate dehydrogenase ; Holliday junction branch migration DNA helicase RuvB ; MULTISPECIES: Holliday junction branch migration DNA helicase RuvB	132738	183	1	0.00843
rpoS	HCl,NaOH	Biocide	RNA polymerase subunit sigma ; RNA polymerase sigma factor RpoS ; MULTISPECIES: RNA polymerase sigma factor RpoS ; RNA polymerase sigma subunit	120794	138	1	0.00767
robA	Ag,Hg,Cd,Cyclohexane,Pentane,n-hexane,Diphenyl Ether	Metal;Biocide	MULTISPECIES: MDR efflux pump AcrAB transcriptional activator RobA ; DNA-binding transcriptional activator ; MDR efflux pump AcrAB transcriptional activator RobA ; MULTISPECIES: RobA family efflux pump transcriptional activator ; right origin-binding protein	63544	67	1	0.00403
recG	Cr,Te,Se	Metal;Biocide	MULTISPECIES: DNA helicase RecG ; MULTISPECIES: ATP-dependent DNA helicase RecG ; ATP-dependent DNA helicase RecG ; DNA helicase RecG ; ATP-dependent DNA helicase RecG, partial	121026	172	1	0.00768
recG	Cr	Metal;Biocide	MULTISPECIES: DNA helicase RecG ; MULTISPECIES: ATP-dependent DNA helicase RecG ; ATP-dependent DNA helicase RecG ; DNA helicase RecG ; ATP-dependent DNA helicase RecG, partial	121026	4	1	0.00768
rcnR/yohL	Co,Ni,Fe	Metal	MULTISPECIES: metal/formaldehyde-sensitive transcriptional repressor ; MULTISPECIES: transcriptional repressor RcnR ; transcriptional repressor RcnR ; metal/formaldehyde-sensitive transcriptional repressor	9660	9	1	0.00061
rcnB/yohN	Ni,Co	Metal	heavy metal resistance protein ; nickel/cobalt homeostasis protein RcnB	9834	7	0.92308	0.00062
rcnA/yohM	Co,Ni,Fe	Metal	nickel/cobalt efflux protein RcnA	17936	11	1	0.00114
qrg	CTAB	Biocide	QacE family quaternary ammonium compound efflux SMR transporter	86	2	0.30769	1.0E-5
qacR	Chlorhexidine,CPC,QACs,BAC,Pentamidine,Propamidine,Diaminodiphenylamine	Biocide	transcriptional regulator ; MULTISPECIES: transcriptional regulator ;B Chain B, Crystal Structure Of Qacr(E58q) Bound To Berberine	7820	11	0.92308	0.0005
qacJ	BAC	Biocide	quaternary ammonium compound efflux SMR transporter QacJ	12	2	0.07692	7.61757e-7
qacG	BAC,Ethidium Bromide	Biocide	quaternary ammonium compound efflux SMR transporter QacG	10	1	0.07692	6.34797e-7
qacF	CTM	Biocide	MULTISPECIES: quaternary ammonium compound efflux SMR transporter QacL	82	1	0.23077	1.0E-5
qacE	BAC,Ethidium Bromide,Pyronin Y,Rhodamine 6G,Crystal Violet,CTM,CPC,QACs	Biocide	ORF3-QacEdelta1 fusion protein (plasmid) ; QacE family quaternary ammonium compound efflux SMR transporter	15988	4	1	0.00101
qacA	BAC,Ethidium Bromide,Acriflavine,Chlorhexidine,CPC,Crystal Violet,Pyronin Y,Quinaldine red,Rhodamine 6G,Safranin O,CTM,Alexidine,Amicarbalide,Pentamidine,Hexamidine,Propamidine,Diamidinodiphenylamine,Dibrompropamidine,1a-62/JC-1-127,1i-39/JC-1-134,Stilbamidine,Phenamidine,Diminazene	Biocide	QacA/B family quaternary ammonium compound efflux MFS transporter ; Antiseptic resistance protein (plasmid)	7490	8	0.76923	0.00048
pstS	As	Metal	MULTISPECIES: phosphate ABC transporter substrate-binding protein ; phosphate-binding protein ; phosphate ABC transporter substrate-binding protein ; phosphate ABC transporter substrate-binding protein PstS ; MULTISPECIES: phosphate-binding protein	63218	19	1	0.00401
pstC	As	Metal	phosphate ABC transporter, permease protein PstC ; Phosphate transport system permease protein pstC ; phosphate ABC transporter permease subunit PstC ; phosphate ABC transporter permease ; MULTISPECIES: phosphate transporter permease subunit PstC ; phosphate transporter permease subunit PstC ; MULTISPECIES: phosphate ABC transporter permease subunit PstC	43144	54	1	0.00274
pstB	As	Metal	phosphate transporter ATP-binding protein ; Phosphate import ATP-binding protein PstB (Phosphate-transporting ATPase) ; MULTISPECIES: phosphate ABC transporter ATP-binding protein PstB ; ATP-binding component of an ABC superfamily phosphate transporter ; phosphate ABC transporter ATP-binding protein PstB ; phosphate ABC transporter ATP-binding protein ; phosphate transport ATP-binding	101840	135	1	0.00646
pstA	As	Metal	PhoU and BPD transp 1 and ABC tran domain contain ing protein ; phosphate ABC transporter, inner membrane subunit PstA ; MULTISPECIES: phosphate ABC transporter, permease protein PstA ; MULTISPECIES: phosphate transporter permease subunit PtsA ; phosphate ABC transporter permease ; phosphate transporter permease subunit PtsA ; phosphate ABC transporter, permease protein PstA	49034	56	1	0.00311
pmrG	Fe	Metal	phosphoglycerate mutase family protein ; histidine phosphatase family protein ; lipopolysaccharide core heptose(II)-phosphate phosphatase	21404	6	0.92308	0.00136
pmrC	Fe	Metal	putative cell division protein ; phosphoethanolamine transferase EptA	39542	23	1	0.00251
pmrB	Fe	Metal	MULTISPECIES: two-component system sensor histidine kinase BasS ; sensor histidine kinase BasS ; two-component system sensor histidine kinase BasS	50196	30	1	0.00319
pmrA	Fe	Biocide	Predicted arabinose efflux permease, MFS family ; two-component system response regulator BasR ; multidrug transporter ; putative substrate transporter : Major facilitator superfamily (multi-drug resistance protein) ; MFS transporter ; ribosomal protein L33 ; multi-drug resistance efflux pump PmrA ; transporter, major facilitator family protein ; MULTISPECIES: MFS transporter ; MULTISPECIES: two-…	79384	1	1	0.00504
pmrA	Acriflavine,Ethidium Bromide	Biocide	Predicted arabinose efflux permease, MFS family ; two-component system response regulator BasR ; multidrug transporter ; putative substrate transporter : Major facilitator superfamily (multi-drug resistance protein) ; MFS transporter ; ribosomal protein L33 ; multi-drug resistance efflux pump PmrA ; transporter, major facilitator family protein ; MULTISPECIES: MFS transporter ; MULTISPECIES: two-…	79384	133	1	0.00504
pmpM	BAC,Ethidium Bromide,TPP,Acriflavine	Biocide	MATE family efflux transporter ; Multi antimicrobial extrusion protein (Na(+)/drug antiporter), MATE family of MDR efflux pump	3318	12	0.84615	0.00021
pitA	Zn,Te	Metal	MULTISPECIES: inorganic phosphate transporter ; inorganic phosphate transporter 1 ; inorganic phosphate transporter	62432	35	1	0.00396
phoR	BAC,Chlorhexidine	Biocide	two-component system sensor histidine kinase PhoQ ; sensor protein PhoQ ; MULTISPECIES: two-component system sensor histidine kinase PhoQ	46534	14	1	0.00295
phoB	BAC,Chlorhexidine	Biocide	two-component system response regulator PhoP ; transcriptional regulatory protein phoP ; MULTISPECIES: two-component system response regulator PhoP ; PhoP, partial	18490	18	1	0.00117
pgpA/ltpgpA	As,Sb	Metal	ABC-thiol transporter ; ABC-thiol transporter (MRPA), partial ; putative mitochondrial ABC-thiol transporter ; putative mitochondrial ATP-binding cassette protein subfamily C, member 1, putative (ABCC1) ; ABC-thiol transporter, partial ; P-glycoprotein, partial ; ATP-binding cassette protein subfamily C, member 2 ; putative ABC transporter ; putative ATP-binding cassette protein subfamily C,membe…	1590	29	1	0.0001
pfr	Fe,Cu,Mn	Metal	MULTISPECIES: Ferritin-like protein 2 ; MULTISPECIES: ferritin ; ferritin	20510	42	1	0.0013
perR	H2O2	Biocide	peroxide-responsive repressor ; putative Fur family transcriptional regulator ; Fur family transcriptional regulator ; MULTISPECIES: transcriptional repressor ; transcriptional repressor ; peroxide operon regulator ; hypothetical protein B4102_1826 ; Fur family transcriptional regulator, peroxide stress response regulator ; peroxide-responsive repressor PerR	29518	94	0.92308	0.00187
pdrM	Acriflavine,DAPI	Biocide	MATE family efflux transporter ; multidrug transporter MatE ; Dihydrolipoamide acetyltransferase	2314	7	0.76923	0.00015
pcoS	Cu	Metal	MULTISPECIES: sensor histidine kinase ; two-component system OmpR family, heavy metal sensor histidine kinase CusS, partial ; sensor histidine kinase	2996	7	0.46154	0.00019
pcoR	Cu	Metal	DNA-binding response regulator ; MULTISPECIES: DNA-binding response regulator	3926	12	0.69231	0.00025
pcoE	Cu,Ag	Metal	hypothetical protein ; MULTISPECIES: copper-binding protein	1120	2	0.15385	7.0E-5
pcoD	Cu	Metal	MULTISPECIES: copper resistance protein D	2478	1	0.15385	0.00016
pcoB	Cu	Metal	MULTISPECIES: copper resistance protein B ; copper resistance protein CopB	2358	3	0.30769	0.00015
pcoA	Cu	Metal	multicopper oxidase PcoA	3274	1	0.15385	0.00021
pcm	SDS,CCCP,Acriflavine	Biocide	protein-L-isoaspartate O-methyltransferase ; MULTISPECIES: protein-L-isoaspartate O-methyltransferase ; Protein-L-isoaspartate O-methyltransferase	14620	17	0.92308	0.00093
pbrT	Pb	Metal	iron permease ; MULTISPECIES: iron permease	3300	7	0.76923	0.00021
pbrR	Pb	Metal	Cd(II)/Pb(II)-responsive transcriptional regulator	162	2	0.23077	1.0E-5
pbrB/pbrC	Pb	Metal	signal peptidase II	3994	10	0.69231	0.00025
pbrA	Pb	Metal	Pb-efflux ATPase	1426	10	0.46154	9.0E-5
oxyRkp	H2O2,SDC,Acriflavine,Rhodamine 6G,Ethidium Bromide,SDS	Biocide	DNA-binding transcriptional regulator OxyR ; MULTISPECIES: DNA-binding transcriptional regulator OxyR ; oxyR ; transcriptional regulator	166418	161	1	0.01056
ostA/lptD	n-hexane	Biocide	MULTISPECIES: LPS assembly protein LptD ; LPS assembly protein LptD ; MULTISPECIES: LPS-assembly protein LptD ; LPS biosynthesis protein	20522	26	1	0.0013
oqxB	BAC,ClO2,Triclosan,CTM,Chlorhexidine,SDS,Acriflavine	Biocide	MULTISPECIES: multidrug efflux RND transporter permease subunit OqxB5	2548	1	0.23077	0.00016
oqxA	BAC,ClO2,Triclosan,CTM,Chlorhexidine,SDS,Acriflavine	Biocide	MULTISPECIES: multidrug efflux RND transporter periplasmic adaptor subunit OqxA10 ; efflux RND transporter periplasmic adaptor subunit ; MULTISPECIES: MexE family multidrug efflux RND transporter periplasmic adaptor subunit ; multidrug efflux RND transporter periplasmic adaptor subunit OqxA	10302	7	0.76923	0.00065
oprN	Triclosan,n-hexane,p-xylene	Biocide	MULTISPECIES: RND transporter ; RND transporter ; MULTISPECIES: TolC family protein ; TolC family protein	12512	8	0.84615	0.00079
oprM/oprK	n-hexane,p-xylene	Biocide	AdeC/AdeK/OprM family multidrug efflux complex outer membrane factor ; MULTISPECIES: adeC/adeK/oprM family multidrug efflux complex outer membrane factor ; adeC/adeK/oprM family multidrug efflux complex outer membrane factor	12910	9	0.84615	0.00082
oprJ	Triclosan,n-hexane,p-xylene	Biocide	multidrug transporter	20	1	0.30769	1.26959e-6
ompD/nmpC	Methyl Viologen	Biocide	MULTISPECIES: porin OmpC ; phosphoporin PhoE ; porin OmpC ; MULTISPECIES: phosphoporin PhoE ; porin OmpD ; MULTISPECIES: porin OmpD	75492	60	1	0.00479
nrsS	Ni	Metal	Histidine kinase-, DNA gyrase B-, and HSP90-like ATPase ; phosphate regulon sensor protein PhoR ; MULTISPECIES: sensor histidine kinase ; sensor histidine kinase, partial ; MULTISPECIES: two-component sensor histidine kinase ; hypothetical protein NIES208_08465 (plasmid) ; two-component sensor histidine kinase ; hypothetical protein ; histidine kinase ; sensor histidine kinase	520884	670	1	0.03307
nrsD/nreB	Ni,Co	Metal	MFS transporter, NRE family, putaive nickel resistance protein ; hypothetical protein B7Y72_02565 ; MULTISPECIES: MFS transporter ; MFS transporter	7790	39	0.76923	0.00049
nrsA	Ni	Metal	CusA/CzcA family heavy metal efflux RND transporter	26622	6	0.92308	0.00169
nreB	Co,Ni	Metal	MFS transporter	58	3	0.30769	3.68182e-6
norM/pmpM	BAC	Biocide	MATE family multidrug exporter ; MULTISPECIES: MATE family efflux transporter ; MATE family efflux transporter ; multidrug resistance protein, MATE family ; MATE efflux family protein	26834	12	1	0.0017
norB	CTM	Biocide	transmembrane efflux protein ; MULTISPECIES: MFS transporter ; MFS transporter	13620	33	0.84615	0.00086
norA	CTM,Acriflavine,BAC,Chlorhexidine,Crystal Violet,QACs,Ethidium Bromide,Pentamidine,Pyronin Y,Rhodamine 6G,TPP	Biocide	MFS transporter ; multidrug efflux MFS transporter NorA ; MULTISPECIES: multidrug efflux MFS transporter NorA	8128	31	0.76923	0.00052
nmtR	Ni,Cd,Pb	Metal	MULTISPECIES: ArsR family transcriptional regulator ; transcriptional regulator ; MULTISPECIES: transcriptional regulator ; ArsR family transcriptional regulator	742	10	0.84615	5.0E-5
nixA	Ni	Metal	HoxN/HupN/NixA family nickel/cobalt transporter ; high-affinity nickel-transport protein nixA	4452	10	0.53846	0.00028
nikR	Ni	Metal	nickel-responsive transcriptional regulator NikR ; nickel responsive regulator NikR	1262	2	0.76923	8.0E-5
nikE	Ni	Metal	nickel transporter ATP-binding protein NikE ; nickel ABC transporter, ATP-binding protein ; NikE ; nickel transporter subunit; ATP-binding component of ABC superfamily ; MULTISPECIES: nickel import ATP-binding protein NikE ; Nickel transport ATP-binding protein NikE (TC 3.A.1.5.3) ; nickel import ATP-binding protein NikE ; MULTISPECIES: ABC transporter ATP-binding protein ; ABC transporter ATP-bi…	300220	438	1	0.01906
nikD	Ni	Metal	nickel ABC transporter ATP-binding protein NikD ; ABC transporter ATP-binding protein, partial ; MULTISPECIES: nickel import ATP-binding protein NikD ; nickel import ATP-binding protein NikD ; ABC transporter ATP-binding protein ; nickel transport system ATP-binding protein	177012	262	1	0.01124
nikC	Ni	Metal	MULTISPECIES: nickel ABC transporter permease subunit NikC ; nickel ABC transporter permease subunit NikC ; nickel transporter permease NikC	161604	205	1	0.01026
nikB	Ni	Metal	Nickel transport system permease protein NikB (TC 3.A.1.5.3) ; nickel ABC transporter, permease subunit NikB ; nickel transport system permease protein ; nickel ABC transporter permease subunit NikB ; MULTISPECIES: nickel ABC transporter permease subunit NikB	177430	246	1	0.01126
nikA	Ni	Metal	A Chain A, Crystal Structure Of Mutant Nika ; nickel ABC transporter substrate-binding protein ; nickel ABC transporter, nickel/metallophore periplasmic binding protein ; MULTISPECIES: nickel ABC transporter, nickel/metallophore periplasmic binding protein ; nickel transport system substrate-binding protein ; nickel ABC transporter, periplasmic nickel-binding protein ; MULTISPECIES: nickel ABC tr…	177652	233	1	0.01128
nia	Fe,Ni	Metal	Cation transport P-type ATPase ; heavy metal translocating P-type ATPase	5556	17	0.84615	0.00035
nfsA	Cr	Metal	oxygen-insensitive NADPH nitroreductase ; oxygen-insensitive NADPH nitroreductase, partial ; MULTISPECIES: oxygen-insensitive NADPH nitroreductase ; NADPH-dependent oxidoreductase ;AF394662_1 glutathione-S-transferase-nitroreductase A fusion protein ; nitroreductase A	26622	32	1	0.00169
ncrC	Ni	Metal	hypothetical protein ABF68_09780, partial	8	1	0.07692	5.07838e-7
mtrR	Triton X-100,Crystal Violet	Biocide	TetR family transcriptional regulator ; mtrCDE transcriptional repressor ; MtrR, partial ; multiple transferable resistance repressor ; Mtr repressor	3894	11	1	0.00025
mtrF	Triton X-100	Biocide	putative efflux pump component MtrF ; p-aminobenzoyl-glutamate transporter ; aminobenzoyl-glutamate transporter, partial ; Efflux pump component MtrF ; transporter ; aminobenzoyl-glutamate transport protein ; aminobenzoyl-glutamate transporter	36272	95	1	0.0023
mtrE	Triton X-100,Sodium Cholate	Biocide	membrane protein ; MULTISPECIES: multidrug transporter	16104	2	0.61538	0.00102
mtrD	Triton X-100	Biocide	hydrophobe/amphiphile efflux-1 family RND transporter ; phospho-N-acetylmuramoyl-pentapeptide-transferase	46010	48	1	0.00292
mtrA	Triton X-100	Biocide	MULTISPECIES: AraC family transcriptional regulator ; AraC family transcriptional regulator ; putative helix-turn-helix, AraC type, subdomain 2 ; hypothetical protein A7P96_06510	189304	208	1	0.01202
modE	W,Mo	Metal	molybdenum-dependent transcriptional regulator ; MULTISPECIES: molybdenum-dependent transcriptional regulator	16674	17	1	0.00106
modC	W,Mo	Metal	ABC transporter ATPase ; molybdenum ABC transporter, ATP-binding protein ; molybdenum ABC transporter ATPase, partial ; molybdenum ABC transporter ATP-binding protein ModC ; MULTISPECIES: molybdenum ABC transporter ATPase ; ABC transporter ATP-binding protein, partial ; molybdenum ABC transporter ATPase ; putative molybdate ABC transporter ATP-binding protein ; MULTISPECIES: molybdenum import ATP…	157712	313	1	0.01001
modB	W,Mo	Metal	molybdate ABC transporter permease ; molybdate ABC transporter, permease protein ; Molybdenum transport system permease protein ModB ; ABC-type molybdate transport system, permease component ; molybdenum ABC transporter permease subunit ; hypothetical protein APF76_11705 ; MULTISPECIES: molybdate ABC transporter permease subunit ; molybdate ABC transporter permease subunit ; MULTISPECIES: molybda…	150354	173	1	0.00954
modA	W,Mo	Metal	molybdate ABC transporter substrate-binding protein ; Molybdenum ABC transporter, periplasmic molybdenum-binding protein ModA (TC 3.A.1.8.1) ; MULTISPECIES: molybdate ABC transporter substrate-binding protein	24158	54	0.92308	0.00153
mntR	Mn,Mg	Metal	MULTISPECIES: transcriptional regulator MntR ; transcriptional regulator MntR ; Inner membrane protein YbiR	146566	189	0.92308	0.0093
mntP/yebN	Mn,Mg,Methyl Viologen,H2O2	Metal;Biocide	hypothetical protein BH713_11760 ; manganese efflux pump MntP ; hypothetical protein HMPREF9530_03673, partial ; hypothetical protein AL479_21830 ; hypothetical protein YebN ; membrane protein ; hypothetical protein LFZ1_14785 ; hypothetical protein QS37_09970 ; hypothetical protein SES60163_10207 ; MULTISPECIES: membrane protein ; hypothetical protein ; hypothetical protein BWZ29_16265 ; MULTISP…	22236	49	1	0.00141
mntH/yfeP	Mn,Fe,Cd,Co,Zn	Metal	manganese transport protein MntH ; MULTISPECIES: divalent metal cation transporter ; divalent metal cation transporter ; manganese/divalent cation transporter	41868	45	1	0.00266
mntA/ytgA	Mn,Cd	Metal	ABC transporter periplasmic substrate-binding protein ; MULTISPECIES: manganese transporter ; manganese transporter ; MULTISPECIES: Mn2+ ABC transporter substrate-binding protein ; periplasmic solute binding protein	14656	56	0.84615	0.00093
mmco	Cu	Metal	oxidase	38	1	0.07692	2.41223e-6
mmR	TPP,Acriflavine,Ethidium Bromide,Safranin O,Pyronin Y	Biocide	MULTISPECIES: QacE family quaternary ammonium compound efflux SMR transporter ; QacE family quaternary ammonium compound efflux SMR transporter	256	3	0.23077	2.0E-5
mgtA	Co,Mg	Metal	magnesium-translocating P-type ATPase ; MULTISPECIES: magnesium-translocating P-type ATPase ; ATPase P ; magnesium-transporting P-type ATPase ; type I magnesium transporting ATPase ; magnesium ABC transporter ATPase	136556	304	1	0.00867
mexW	Ethidium Bromide,Acriflavine	Biocide	multidrug efflux protein	3886	3	0.38462	0.00025
mexV	Ethidium Bromide,Acriflavine	Biocide	MULTISPECIES: RND transporter ; efflux RND transporter periplasmic adaptor subunit ; MexH family multidrug efflux RND transporter periplasmic adaptor subunit	22596	6	0.84615	0.00143
mexT	Triclosan	Biocide	MULTISPECIES: LysR family transcriptional regulator ; transcriptional regulator MexT ; MULTISPECIES: transcriptional regulator MexT ; LysR family transcriptional regulator	79444	60	1	0.00504
mexR	Triclosan	Biocide	MarR family transcriptional regulator	1642	1	0.46154	0.0001
mexK	Triclosan	Biocide	AcrB/AcrD/AcrF family protein	2062	5	0.23077	0.00013
mexI	V,Triclosan	Metal;Biocide	MexW/MexI family multidrug efflux RND transporter permease subunit, partial ; acriflavine resistance protein B ; MexW/MexI family multidrug efflux RND transporter permease subunit	1866	4	0.53846	0.00012
mexF	Triclosan,n-hexane,p-xylene	Biocide	AcrB/AcrD/AcrF family protein	9510	1	0.53846	0.0006
mexD	Triclosan,n-hexane,p-xylene	Biocide	multidrug efflux RND transporter permease subunit	74	2	0.23077	4.69750e-6
mexC	Triclosan,n-hexane,p-xylene	Biocide	efflux RND transporter periplasmic adaptor subunit ; MexC family multidrug efflux RND transporter periplasmic adaptor subunit	9180	3	0.84615	0.00058
mexB	Triclosan,n-hexane,p-xylene	Biocide	multidrug efflux RND transporter permease subunit	52	1	0.23077	3.30095e-6
merT-P	Hg	Metal	heavy metal transporter	230	3	0.69231	1.0E-5
merT	Hg	Metal	mercuric ion transporter MerT, partial	42	3	0.23077	2.66615e-6
merR1	Hg	Metal	Mercuric ion resistance operon regulatory protein, MerR ; hypothetical protein A3F68_01705 ; MerR family transcriptional regulator ; mercuric resistance operon regulatory protein MerR ; transcriptional regulator, MerR family protein ; MerR ; MULTISPECIES: heavy metal-responsive transcriptional regulator ; heavy metal-responsive transcriptional regulator ; Hg(II)-responsive transcriptional regulat…	46554	105	1	0.00296
merR	Hg	Metal	Hg(II)-responsive transcriptional regulator ; ArsR family transcriptional regulator ; MULTISPECIES: Hg(II)-responsive transcriptional regulator	5114	6	0.84615	0.00032
merP	Hg	Metal	MULTISPECIES: mercuric transport protein periplasmic component ; MerP ; mercuric transport protein periplasmic component	722	5	0.53846	5.0E-5
merE	Hg	Metal	MULTISPECIES: mercury resistance protein ; DUF3330 domain-containing protein ; mercury resistance protein	81502	71	1	0.00517
merD	Hg	Metal	mercuric resistance transcriptional repressor protein MerD	44	2	0.23077	2.79311e-6
merC	Hg	Metal	MULTISPECIES: hypothetical protein	74	3	0.46154	4.69750e-6
merB3	Hg,Phenylmercury Acetate	Metal;Biocide	alkylmercury lyase	3752	2	0.46154	0.00024
merB2	Hg,Phenylmercury Acetate	Metal;Biocide	mercury(II) reductase ; hypothetical protein	82	2	0.46154	1.0E-5
merB1	Hg,Phenylmercury Acetate	Metal;Biocide	pyridine nucleotide-disulfide oxidoreductase	14	1	0.07692	8.88716e-7
merA	Hg,Phenylmercury Acetate	Metal;Biocide	mercury(II) reductase ; mercuric reductase (plasmid) ; MULTISPECIES: mercury(II) reductase ; mercury(II) reductase, partial ; mercuric reductase, partial ; Mercuric ion reductase ; Mercuric reductase ; mercuric reductase, MerA ; mercuric ion reductase, contains HMA domain ; mercuric reductase ; mercury reductase enzyme	314360	502	1	0.01996
mepA	Chlorhexidine,Ethidium Bromide,TPP, Acriflavine,Rhodamine 6G,QACs,Pentadiamine,TMA-DPH,BAC,CTM,Crystal Violet,Pyronin Y	Biocide	multidrug efflux MATE transporter MepA ; MULTISPECIES: MATE family efflux transporter ; MATE family efflux transporter ; MULTISPECIES: multidrug efflux MATE transporter MepA ; multidrug export protein MepA	19446	93	0.92308	0.00123
mdtN/yjcR	Acriflavine,TPA	Biocide	multidrug transporter subunit MdtN ; MULTISPECIES: multidrug transporter subunit MdtN	76116	30	1	0.00483
mdtM/yjiO	TPP,Ethidium Bromide,Acriflavine,TPA	Biocide	multidrug resistance protein MdtM ; MFS transporter, partial ; MULTISPECIES: MFS transporter ; MFS transporter	62610	20	1	0.00397
mdtK/ydhE	TPP,SDC,Ethidium Bromide,BAC,Acriflavine	Biocide	multidrug resistance protein MdtK ; multidrug transporter MdtK ; MULTISPECIES: multidrug resistance protein MdtK ; MULTISPECIES: multidrug transporter MdtK	17494	10	1	0.00111
mdtJ/ebrB/ydgF	Spermidine	Biocide	Spermidine export protein MdtJ ; MULTISPECIES: multidrug/spermidine transporter subunit MdtJ ; MULTISPECIES: multidrug transporter subunit MdtJ	7888	9	1	0.0005
mdtI/ydgE	SDC,SDS,Spermidine	Biocide	MULTISPECIES: multidrug/spermidine transporter subunit MdtI ; multidrug transporter ; multidrug/spermidine transporter subunit MdtI	6274	8	0.92308	0.0004
mdtG/yceE	SDC	Biocide	MFS transporter ; MULTISPECIES: MFS transporter ; multidrug resistance protein MdtG ; multidrug transporter MdtG	28822	22	1	0.00183
mdtF/yhiV	Crystal Violet,SDS,TPP,SDC,Rhodamine 6G,BAC	Biocide	multidrug efflux RND transporter permease subunit ; hydrophobe/amphiphile efflux-1 family RND transporter ; MULTISPECIES: multidrug efflux RND transporter permease subunit	33204	4	1	0.00211
mdtE/yhiU	Crystal Violet,SDS,TPP,SDC,Rhodamine 6G,BAC	Biocide	efflux transporter periplasmic adaptor subunit ; multidrug efflux system protein MdtE ; MULTISPECIES: MexE family multidrug efflux RND transporter periplasmic adaptor subunit ; HlyD family protein secretion protein	32102	6	1	0.00204
mdtC/yegO	SDC	Biocide	multidrug transporter subunit MdtC	3418	4	0.92308	0.00022
mdtC	Zn	Metal	multidrug resistance protein MdtC ; multidrug transporter subunit MdtC	3366	12	0.84615	0.00021
mdtB/yegN	SDC,HCl	Biocide	multidrug transporter subunit MdtB ; multidrug resistance protein MdtB ; MULTISPECIES: multidrug resistance protein MdtB	20694	16	1	0.00131
mdtB	Zn	Metal	multidrug transporter subunit MdtB	228	6	0.38462	1.0E-5
mdtA/yegM	SDC	Biocide	multidrug resistance protein mdtA ; MULTISPECIES: multidrug transporter subunit MdtA ; multidrug transporter subunit MdtA	17760	10	0.84615	0.00113
mdtA	Zn	Metal	multidrug resistance protein MdtA ; multidrug transporter subunit MdtA	3918	10	0.84615	0.00025
mdrL/yfmO	Zn,Cobalt,Cr,Ethidium Bromide,BAC	Metal;Biocide	MFS transporter	196	1	0.30769	1.0E-5
mdfA/cmr	BAC,Ethidium Bromide,Acriflavine,TPP,NaOH,Rhodamine 6G	Biocide	MFS_1 ; MULTISPECIES: multidrug transporter MdfA ; multidrug transporter MdfA	16872	5	0.84615	0.00107
mdeA	CTM,BAC,Hoechst 33342,Ethidium Bromide,Rhodamine 6G,Acriflavine,TPP,Chlorhexidine,Crystal Violet,QACs,Pentamidine,Pyronin Y	Biocide	methionine gamma-lyase ; MULTISPECIES: methionine gamma-lyase	141764	250	1	0.009
mco	Cu,Co	Metal	copper oxidase ; multicopper oxidase ; multicopper oxidase type 3 ; multicopper oxidases signature 2	24198	23	1	0.00154
marR	Cyclohexane,Diphenyl Ether,n-hexane	Biocide	transcriptional regulator ; beta-lactamase ;A Chain A, Crystal Structure Of The Reduced Form Of Marr From E.coli ; MULTISPECIES: multiple antibiotic resistance transcriptional regulator MarR ; multiple antibiotic resistance transcriptional regulator MarR	26338	41	1	0.00167
marA	Cyclohexane,Diphenyl Ether,n-hexane	Biocide	MULTISPECIES: MDR efflux pump AcrAB transcriptional activator MarA ; MDR efflux pump AcrAB transcriptional activator MarA ; MarB protein ; DNA-binding transcriptional dual activator of multiple antibiotic resistance ; transcriptional regulator	31268	74	1	0.00198
lmrS	TPP,SDS,Ethidium Bromide,CTM	Biocide	drug resistance MFS transporter, drug:H+ antiporter-2 family ; multidrug MFS transporter ; MULTISPECIES: MFS transporter ; MFS transporter	37796	99	0.92308	0.0024
lde	Acridine Orange,Ethidium Bromide	Biocide	MFS transporter ; transporter, major facilitator family protein ; multidrug transporter MdtG	4466	15	0.76923	0.00028
kpnO	H2O2,CCCP,BAC,Chlorhexidine,NaNo2	Biocide	MULTISPECIES: porin OmpC ; porin OmpC ; MULTISPECIES: phosphoporin PhoE ; MULTISPECIES: OmpK36 porin ; phosphoporin PhoE ; OmpK36 porin ; OmpE36	48044	47	1	0.00305
kpnF	SDS,SDC,BAC,Chlorhexidine,Triclosan,Methyl Viologen,H2O2	Biocide	multidrug/spermidine transporter subunit MdtI	410	1	0.84615	3.0E-5
kpnE	SDS,SDC,BAC,Chlorhexidine,Triclosan,Methyl Viologen,H2O2	Biocide	multidrug/spermidine transporter subunit MdtJ	334	1	0.76923	2.0E-5
kmtR	Ni,Co	Metal	transcriptional regulator ; ArsR family transcriptional regulator	38	2	0.46154	2.41223e-6
kmrA	Acriflavine,DAPI,Hoechst 33342,TPP,Methyl Viologen,Ethidium Bromide,CTM	Biocide	MFS transporter	8798	7	0.76923	0.00056
klaC/telB	Te	Metal	hypothetical protein	222	1	0.15385	1.0E-5
klaB/telA/kilB	Te	Metal	toxic anion resistance protein ; tellurium resistance protein	14104	24	0.92308	0.0009
kexD	Rhodamine 6G,TPP,Ethidium Bromide,Sodium Cholate,SDC	Biocide	hydrophobe/amphiphile efflux-1 family RND transporter ; MULTISPECIES: multidrug efflux RND transporter permease subunit	2316	2	0.15385	0.00015
kdeA	Acriflavine,Ethidium Bromide,TPP,SDS	Biocide	MULTISPECIES: multidrug transporter MdfA ; multidrug transporter MdfA	31074	55	1	0.00197
irlS	Cd,Zn	Metal	hypothetical protein AUK53_07155 ; two-component sensor histidine kinase ; sensor histidine kinase	42228	43	1	0.00268
irlR	Cd,Zn	Metal	DNA-binding response regulator ; two component heavy metal response transcriptional regulator ; two-component system response regulator ; DNA-binding response regulator, partial ; DNA-binding response regulator in two-component regulatory system with CusS ; MULTISPECIES: DNA-binding response regulator	32866	65	1	0.00209
ideR	Fe,H2O2,Plumbagin	Metal;Biocide	metal-dependent transcriptional regulator ; MULTISPECIES: metal-dependent transcriptional regulator	4060	5	0.76923	0.00026
iclR	Sodium acetate	Biocide	acetate operon transcriptional repressor IclR ; MULTISPECIES: acetate operon transcriptional repressor IclR ; acetate operon repressor ; MULTISPECIES: IclR family transcriptional regulator ; IclR family transcriptional regulator	26634	25	1	0.00169
ibpB	H2O2	Biocide	small heat shock protein IbpB (16 kDa heat shock protein B) ; heat shock chaperone IbpB ; MULTISPECIES: heat shock chaperone IbpB	12190	6	1	0.00077
ibpA	H2O2	Biocide	heat shock protein IbpA ; MULTISPECIES: heat shock protein IbpA ; heat-shock protein Hsp20	14504	7	1	0.00092
hupE2	Ni	Metal	urease accessory protein	40	1	0.23077	2.53919e-6
hmrR	Cu,HCl	Metal;Biocide	transcriptional regulator ; MULTISPECIES: Cu(I)-responsive transcriptional regulator ; Cu(I)-responsive transcriptional regulator	13070	93	0.92308	0.00083
hmrM	Acriflavine,DAPI,Ethidium Bromide,TPP,SDC,Hoechst 33342	Biocide	MULTISPECIES: MATE family efflux transporter ; MATE family efflux transporter	1204	3	0.69231	8.0E-5
hefC	HCl	Biocide	AcrB/AcrD/AcrF family protein	14696	11	0.84615	0.00093
hdeB/yhiC	HCl	Biocide	acid-resistance protein HdeB ; acid-resistance protein ; protein hdeB ; MULTISPECIES: protein hdeB ; MULTISPECIES: acid-resistance protein HdeB	9538	8	0.92308	0.00061
hdeA/yhiB	HCl	Biocide	Hns-dependent expression protein A ; acid-resistance protein ; MULTISPECIES: acid stress chaperone HdeA ; hypothetical protein	7726	4	1	0.00049
hasF	SDS,Ethidium Bromide	Biocide	outer membrane channel protein TolC	1934	3	0.92308	0.00012
golT	Cu,Au	Metal	ATPase ; copper-translocating P-type ATPase ; MULTISPECIES: copper-translocating P-type ATPase	316	5	0.30769	2.0E-5
golS	Au	Metal	Cu(I)-responsive transcriptional regulator	376	7	0.69231	2.0E-5
glpF	Sb,As,Glycerol	Metal;Biocide	Glycerol kinase ; MULTISPECIES: aquaporin family protein ; aquaporin family protein ; aquaporin ; MULTISPECIES: aquaporin	105202	221	1	0.00668
gesB	Au,Methylene Blue,Crystal Violet	Metal;Biocide	AcrB/AcrD/AcrF family protein	16	2	0.07692	1.01568e-6
gesA	Au,Methylene Blue,Crystal Violet	Metal;Biocide	efflux RND transporter periplasmic adaptor subunit	1068	2	0.15385	7.0E-5
galE	CTAB	Biocide	MULTISPECIES: UDP-glucose 4-epimerase GalE ; UDP-glucose 4-epimerase GalE ; UDP-glucose 4-epimerase ; uDP-glucose 4-epimerase	224060	294	1	0.01422
gadX	HCl,Rhodamine 6G,SDS	Biocide	MULTISPECIES: AraC family transcriptional regulator ; AraC family transcriptional regulator	44494	11	1	0.00282
gadW/yhiW	HCl	Biocide	MULTISPECIES: AraC family transcriptional regulator ; AraC family transcriptional regulator	32960	21	1	0.00209
gadE/yhiE	HCl	Biocide	transcriptional regulator GadE ; LuxR family transcriptional regulator ; Transcriptional regulator gadE	5638	4	0.92308	0.00036
gadC/xasA	HCl	Biocide	glutamate gamma-aminobutyrate antiporter ; Glutamate/gamma-aminobutyrate antiporter ; glutamate:gamma-aminobutyrate antiporter ; glutamate:gamma aminobutyrate antiporter family protein ; amino acid permease ; MULTISPECIES: glutamate:gamma-aminobutyrate antiporter	90812	115	1	0.00576
gadB	HCl	Biocide	glutamate decarboxylase ; glutamate decarboxylase, partial	522	5	0.61538	3.0E-5
gadA	HCl	Biocide	glutamate decarboxylase ; MULTISPECIES: glutamate decarboxylase, partial ; glutamate decarboxylase alpha ; glutamate decarboxylase, partial	51204	43	1	0.00325
furA	Fe	Metal	MULTISPECIES: transcriptional repressor	1380	2	0.15385	9.0E-5
frnE	Cd,H2O2	Metal;Biocide	MULTISPECIES: DsbA family oxidoreductase ; disulfide bond formation protein DsbA ; DSBA oxidoreductase ; DsbA family oxidoreductase	6670	28	0.92308	0.00042
fpvA	Mn,Fe,Co,Zn,Ni,Cu,Cd,Ga	Metal	ligand-gated channel ; ferripyoverdine receptor ; TonB-dependent siderophore receptor ; MULTISPECIES: TonB-dependent siderophore receptor	175602	74	1	0.01115
fptA	Fe,Co,Ni,Ga	Metal	fe(3+)-pyochelin receptor ; TonB-dependent siderophore receptor ; amino acid ABC transporter substrate-binding protein	3890	6	0.76923	0.00025
fieF/yiip	Fe,Zn,Co,Cd,Ni	Metal	cation-efflux pump FieF ; MULTISPECIES: cation-efflux pump FieF	33680	34	1	0.00214
fetB/ybbM	Fe,H2O2	Metal;Biocide	MULTISPECIES: iron export ABC transporter permease subunit FetB ; MULTISPECIES: membrane protein ; iron export ABC transporter permease subunit FetB ; hypothetical protein BN1086_02483	32816	34	1	0.00208
fetA/ybbL	Fe,H2O2	Metal;Biocide	iron ABC transporter ATP-binding protein FetA ; putative ABC transporter ATP-binding protein YbbL ; putative ATP-binding component of a transport system ; MULTISPECIES: iron ABC transporter ATP-binding protein FetA ; hypothetical protein ECMP0210176_0544	42630	134	1	0.00271
fecE	Ni,Co	Metal	MULTISPECIES: Fe(3+) dicitrate transport ATP-binding protein FecE ; ferric citrate ABC transporter ATP-binding protein FecE, partial ; putative iron-dicitrate transporter subunit ; Fe(3+) dicitrate transport ATP-binding protein FecE ; ferric citrate ABC transporter ATP-binding protein FecE ; iron(III) dicitrate transport ATP-binding protein FecE ; iron ABC transporter ; MULTISPECIES: iron ABC tra…	227862	425	1	0.01446
fecD	Ni,Co	Metal	transport system permease protein (plasmid) ; hemin transport system permease HmuU ; iron-dicitrate transporter subunit FecD ; iron complex transport system permease protein ; Iron-dicitrate ABC transporter permease protein FecD ; Fe(3+) dicitrate transport system permease protein FecD ; MULTISPECIES: Fe3+ dicitrate ABC transporter permease ; MULTISPECIES: iron-dicitrate transporter subunit FecD …	203404	391	1	0.01291
fbpC	Fe,Ga	Metal	iron-utilization ATP-binding protein FbpC2 ;FBPC_NEIGO RecName: Full=Fe(3+) ions import ATP-binding protein FbpC ; MULTISPECIES: ABC transporter ATP-binding protein ; Fe(3+)-transporting ATPase ; peptide ABC transporter substrate-binding protein ; Fe3+ ions import ATP-binding protein FbpC 2 ; fe(3+) ions import ATP-binding protein FbpC ; iron(III) ABC transporter ATP-binding protein ; ABC transpo…	304362	507	1	0.01932
fbpB	Fe,Ga	Metal	iron ABC transporter permease	2552	10	0.46154	0.00016
fbpA	Fe,Ga	Metal	iron ABC transporter substrate-binding protein ; iron ABC transporter substrate-binding protein, partial ; iron-utilization periplasmic protein hFbpA	4770	8	0.76923	0.0003
farR	Palmitic acid	Biocide	homoprotocatechuate degradative operon repressor ; homoprotocatechuate degradation operon regulator HpaR ; Homoprotocatechuate degradative operon repressor ; homoprotocatechuate degradation operon regulator, HpaR ; Transcriptional regulator ; MULTISPECIES: homoprotocatechuate degradation operon regulator HpaR	13328	30	0.92308	0.00085
farB	Phenylmercury Acetate,CCCP,Oleic acid,Linoleic acid,Palmitic acid,Triton X-100	Biocide	MFS transporter	360	2	0.15385	2.0E-5
farA	Phenylmercury Acetate,CCCP,Oleic acid,Linoleic acid,Palmitic acid,Triton X-100	Biocide	hemolysin D	2	1	0.07692	1.26959e-7
fabV	Triclosan	Biocide	trans-2-enoyl-CoA reductase ; enoyl-acyl-carrier-protein	6134	12	0.92308	0.00039
fabL/ygaA	Triclosan	Biocide	LOW QUALITY PROTEIN: enoyl-acyl-carrier-protein; enoyl-acyl-carrier-protein; MULTISPECIES: enoyl-acyl-carrier-protein; short-chain dehydrogenase/reductase SDR	366806	570	1	0.02328
fabK	Triclosan	Biocide	MULTISPECIES: nitronate monooxygenase ; enoyl-acyl-carrier-protein; enoyl-ACP reductase II ; Nitronate monooxygenase	36424	107	1	0.00231
fabI	Triclosan	Biocide	enoyl-ACP reductase FabI ; enoyl-ACP reductase, partial ; MULTISPECIES: enoyl-ACP reductase FabI	20886	19	1	0.00133
evgS	SDC	Biocide	two-component system sensor histidine kinase EvgS ; MULTISPECIES: two-component system sensor histidine kinase EvgS	398358	96	1	0.02529
evgA	SDC	Biocide	MULTISPECIES: two-component response regulator ; transcription regulator EvgA ; virulence protein A ; EvgA family positive transcription regulator ; two-component system response regulator ; DNA-binding response regulator ; Positive transcription regulator evgA ; Positive transcription regulator EvgA ; MULTISPECIES: DNA-binding response regulator	147286	226	1	0.00935
emrY	SDS,Ethidium Bromide	Biocide	multidrug resistance protein EmrY ; MFS transporter	17304	11	1	0.0011
emrRsm	CCCP,TCS	Biocide	MarR family transcriptional regulator	688	6	0.61538	4.0E-5
emrR	CCCP	Biocide	transcriptional regulator ; MULTISPECIES: transcriptional regulator ; transcriptional repressor MprA ; hypothetical protein	9606	20	0.92308	0.00061
emrK	BAC,Crystal Violet,TPP,SDC,SDS	Biocide	EmrA/EmrK family multidrug efflux transporter periplasmic adaptor subunit ; MULTISPECIES: multidrug resistance protein EmrK	19106	2	1	0.00121
emrE/mvrC	BAC,Methyl Viologen,Ethidium Bromide,TPP	Biocide	multidrug SMR transporter ; Multidrug transporter emrE ; multidrug transporter	3924	4	0.92308	0.00025
emrD-3	TPP,Ethidium Bromide,Rhodamine 6G,SDS	Biocide	Bcr/CflA family drug resistance efflux transporter ; multidrug resistance protein D ; MULTISPECIES: MFS transporter ; MFS transporter	24428	32	1	0.00155
emrD	BAC,SDS	Biocide	MFS transporter ; multidrug resistance protein D ; multidrug transporter EmrD	37912	20	1	0.00241
emrCsm	CCCP,TCS	Biocide	multidrug RND transporter	37574	14	1	0.00239
emrBsm	CCCP,TCS	Biocide	EmrB/QacA family drug resistance transporter ; MULTISPECIES: MFS transporter ; multidrug resistance protein B ; MFS transporter	97810	85	1	0.00621
emrB	Phenylmercury Acetate,2-Chlorophenylhydrazine,CCCP	Biocide	multidrug efflux MFS transporter subunit EmrB ; MULTISPECIES: multidrug efflux MFS transporter subunit EmrB	24318	20	1	0.00154
emrAsm	CCCP,TCS	Biocide	MULTISPECIES: multidrug transporter ; multidrug transporter ; MULTISPECIES: efflux pump membrane protein ; multidrug resistance efflux pump ; hemolysin D ; EmrA/EmrK family multidrug efflux transporter periplasmic adaptor subunit ; MULTISPECIES: multidrug resistance efflux pump	25864	18	0.92308	0.00164
emrA	Phenylmercury Acetate,2-Chlorophenylhydrazine,CCCP,TCS	Biocide	multidrug export protein EmrA ; MULTISPECIES: multidrug export protein EmrA ; multidrug resistance protein A	23876	11	1	0.00152
emmdR	BAC,Ethidium Bromide,Acriflavine,Rhodamine 6G	Biocide	FMN/FAD transporter ; multidrug efflux protein ; MULTISPECIES: MATE family efflux transporter ; MATE family efflux transporter ; MULTISPECIES: FMN/FAD transporter ; MATE family multidrug exporter ; putative Na+-driven multidrug efflux system ; multidrug transporter ; FMN/FAD transporter, partial	39288	38	1	0.00249
emhA	Ethidium Bromide,Crystal Violet,SDS	Biocide	efflux RND transporter periplasmic adaptor subunit	9020	1	0.38462	0.00057
emeA	BAC	Biocide	multidrug resistance pump ; transporter, major facilitator family protein ; MFS transporter	34058	25	1	0.00216
eefA	HCl	Biocide	MexE family multidrug efflux RND transporter periplasmic adaptor subunit ; efflux RND transporter periplasmic adaptor subunit ; MULTISPECIES: efflux RND transporter periplasmic adaptor subunit ; MULTISPECIES: acriflavine resistance protein E ; MULTISPECIES: MexE family multidrug efflux RND transporter periplasmic adaptor subunit	4216	5	0.69231	0.00027
ebrB	Ethidium Bromide,Acriflavine,Pyronin Y,Safranin O	Biocide	QacE family quaternary ammonium compound efflux SMR transporter	6	1	0.15385	3.80878e-7
ebrA	Ethidium Bromide,Acriflavine,Pyronin Y,Safranin O	Biocide	QacE family quaternary ammonium compound efflux SMR transporter	82	1	0.15385	1.0E-5
dsbC	Cu	Metal	MULTISPECIES: bifunctional protein-disulfide isomerase/oxidoreductase DsbC ; bifunctional protein-disulfide isomerase/oxidoreductase DsbC	19848	18	1	0.00126
dsbB	Cd,Hg	Metal	MULTISPECIES: disulfide bond formation protein DsbB ; disulfide bond formation protein DsbB ; disulfide bond formation protein B	11158	11	0.92308	0.00071
dsbA	Cd,Zn,Hg	Metal	protein disulfide oxidoreductase DsbA ; MULTISPECIES: thiol:disulfide interchange protein DsbA ; thiol:disulfide interchange protein DsbA ; APH and DSBA and DUF1040 domain containing protei n	61676	39	1	0.00392
dpsA	Fe,H2O2	Metal;Biocide	MULTISPECIES: DNA starvation/stationary phase protection protein ; DNA starvation/stationary phase protection protein	3166	7	0.53846	0.0002
dpr/dps	Fe,H2O2	Metal;Biocide	MULTISPECIES: DNA starvation/stationary phase protection protein ; DNA starvation/stationary phase protection protein ; ferritin ; DNA protection during starvation protein	9510	27	1	0.0006
dmeF	Co,Cd,Ni	Metal	cation transporter	132	1	0.61538	1.0E-5
czrB	Zn,Cd	Metal	efflux RND transporter periplasmic adaptor subunit	12312	2	0.76923	0.00078
czrA	Zn,Cd	Metal	AcrB/AcrD/AcrF family protein	9388	1	0.76923	0.0006
czcR	Cd,Zn,Co	Metal	DNA-binding response regulator ; MULTISPECIES: DNA-binding response regulator	4900	17	0.76923	0.00031
czcP	Cd,Zn,Co	Metal	heavy metal translocating P-type ATPase	12	1	0.38462	7.61757e-7
czcD	Cd,Zn,Co	Metal	cation transporter ;CZCD_ALCSC RecName: Full=Cation efflux system protein CzcD	1732	10	0.69231	0.00011
czcA	Cd,Zn,Co	Metal	CusA/CzcA family heavy metal efflux RND transporter	11960	1	0.61538	0.00076
cutO	Cu	Metal	Multicopper oxidase	20	2	0.15385	1.26959e-6
cutF/nlpE	Cu	Metal	MULTISPECIES: copper homeostasis/adhesion lipoprotein NlpE ; copper homeostasis/adhesion lipoprotein NlpE ; lipoprotein NlpE	10064	10	0.92308	0.00064
cutE/lnt	Cu	Metal	apolipoprotein N-acyltransferase	21794	15	1	0.00138
cutC	Cu	Metal	MULTISPECIES: copper homeostasis protein CutC ; copper homeostasis protein CutC	32130	56	1	0.00204
cutA	Cu	Metal	divalent cation tolerance protein CutA ; MULTISPECIES: divalent cation tolerance protein CutA	75998	33	1	0.00482
cusS	Cu,Ag	Metal	MULTISPECIES: two-component sensor histidine kinase ; two-component sensor histidine kinase ; sensor histidine kinase	20828	16	1	0.00132
cusR/ylcA	Cu,Ag	Metal	DNA-binding response regulator ; MULTISPECIES: DNA-binding response regulator	28492	18	1	0.00181
cusF/cusX	Cu,Ag	Metal	MULTISPECIES: cation transporter ; cation transporter ; copper-binding protein	6162	5	0.92308	0.00039
cusC/ylcB	Cu,Ag	Metal	copper transporter	25028	5	1	0.00159
cusB	Cu,Ag	Metal	efflux RND transporter periplasmic adaptor subunit ; MULTISPECIES: cation efflux system protein CusB	19640	6	1	0.00125
cusA/ybdE	Cu,Ag	Metal	AcrB/AcrD/AcrF family protein ; CusA/CzcA family heavy metal efflux RND transporter ; MULTISPECIES: CusA/CzcA family heavy metal efflux RND transporter	30912	6	1	0.00196
cuiD	Cu,H2O2	Metal;Biocide	multicopper oxidase, partial ; MULTISPECIES: multicopper oxidase CueO ; multicopper oxidase CueO	18964	20	1	0.0012
cueR/ybbI	Cu	Metal	HTH-type transcriptional regulator CueR ; MULTISPECIES: HTH-type transcriptional regulator CueR ; Copper-responsive transcriptional regulator ; Cu(I)-responsive transcriptional regulator ; DNA-binding transcriptional regulator CueR ; MULTISPECIES: Cu(I)-responsive transcriptional regulator	8642	23	1	0.00055
cueR	Cu	Metal	MULTISPECIES: MerR family transcriptional regulator ; MerR family transcriptional regulator	780	5	0.46154	5.0E-5
cueP	Cu	Metal	hypothetical protein	1910	2	0.61538	0.00012
cueO	Cu	Metal	MULTISPECIES: multicopper oxidase CueO ; multicopper oxidase CueO	18158	3	1	0.00115
cueA	Cu,Ag	Metal	copper-translocating P-type ATPase	62	1	0.15385	3.93574e-6
ctpV	Cu	Metal	metal cation transporter P-type ATPase CtpV ; copper-translocating P-type ATPase	64100	98	1	0.00407
ctpG	Cu	Metal	cadmium-translocating P-type ATPase ; MULTISPECIES: copper-translocating P-type ATPase ; heavy metal translocating P-type ATPase	122	4	0.84615	1.0E-5
ctpD	Co,Ni	Metal	cadmium-translocating P-type ATPase ; MULTISPECIES: heavy metal translocating P-type ATPase ; metal ABC transporter ATPase ; heavy metal translocating P-type ATPase ; metal-transporting ATPase	428	20	0.61538	3.0E-5
ctpC	Mn,Zn	Metal	cation-transporting ATPase ; copper-translocating P-type ATPase ; MULTISPECIES: copper-translocating P-type ATPase ; heavy metal translocating P-type ATPase	902	14	0.69231	6.0E-5
csoR	Cu	Metal	transcriptional regulator ; MULTISPECIES: transcriptional regulator ; repressor of copper utilization protein	5828	60	0.92308	0.00037
crdR	Cu	Metal	DNA-binding response regulator ; MULTISPECIES: DNA-binding response regulator	13644	38	0.84615	0.00087
crdA	Cu	Metal	hypothetical protein XU11_C0026G0010	126	2	0.30769	1.0E-5
cpxR	H2O2,BAC,Chlorhexidine	Biocide	DNA-binding response regulator in two-component regulatory system with CpxA ; transcriptional regulator ; Copper-sensing two-component system response regulator CpxR ; DNA-binding response regulator ; MULTISPECIES: DNA-binding response regulator	152574	309	1	0.00969
cpxA	H2O2,BAC,Chlorhexidine	Biocide	two-component system sensor histidine kinase CpxA ; MULTISPECIES: two-component system sensor histidine kinase CpxA	41404	34	1	0.00263
corR	Cu	Metal	Fis family transcriptional regulator ; sigma-54-dependent Fis family transcriptional regulator	150602	154	1	0.00956
corD	Co,Mg	Metal	diadenosine tetraphosphatase ; Co2+/Mg2+ efflux protein ApaG ; Bis(5'-nucleosyl)-tetraphosphatase, symmetrical ; protein ApaG ; MULTISPECIES: Co2+/Mg2+ efflux protein ApaG	33122	24	1	0.0021
corC	Co,Mg	Metal	magnesium/cobalt efflux protein ; MULTISPECIES: magnesium/cobalt transporter CorC ; putative integral membrane protein ; magnesium/cobalt efflux protein CorC ; magnesium/cobalt transporter CorC	43748	90	1	0.00278
corB	Co,Mg	Metal	putative CBS domain-containing protein ; CBS/transporter associated domain protein ; hypothetical protein EC2780750_2865 ;AE005491_3 putative transport protein ; hypothetical protein MC77_16255 ; Uncharacterized CBS domain-containing protein ; inner membrane protein ; magnesium/cobalt efflux protein ; inner membrane protein%2C UPF0053 family ; magnesium/cobalt efflux protein, partial ; Hemolysins…	89910	79	1	0.00571
corA	Mg,Co,Ni,Mn	Metal	magnesium transporter CorA ; magnesium/nickel/cobalt transporter CorA ; magnesium transport protein CorA ; MULTISPECIES: magnesium transporter CorA	37412	19	1	0.00237
copZ	Cu	Metal	MULTISPECIES: copper chaperone CopZ ; copper-transporting ATPase CopA ; copper chaperone ; copper chaperone CopZ ; copper-binding protein ; MULTISPECIES: copper-binding protein ; copper resistance protein CopZ ; heavy metal transport/detoxification protein ; PREDICTED: LOW QUALITY PROTEIN: copper-transporting ATPase 1-like ; copper-translocating P-type ATPase ; copper-exporting ATPase ; MULTISPEC…	3566	72	1	0.00023
copY/tcrY	Cu	Metal	transcriptional regulator ; CopY/TcrY family copper transport repressor ; penicillinase repressor ; MULTISPECIES: CopY/TcrY family copper transport repressor ; transcriptional repressor CopY	5364	44	0.84615	0.00034
copS	Cu	Metal	MULTISPECIES: sensor histidine kinase ; two-component sensor histidine kinase ; sensory histidine kinase in two-component regulatory system with CopR, regulation of copper resistance, senses copper ions ; hypothetical protein ; hypothetical protein Tel_03430 ; hypothetical protein Tel_11905 ; MULTISPECIES: two-component sensor histidine kinase ; sensory histidine kinase in two-component regulator…	159838	256	1	0.01015
copR	Cu	Metal	hypothetical protein B7Z23_02170 ; DNA-binding response regulator ; chemotaxis protein CheY ; Transcriptional activator protein CopR ; two-component system response regulator ; Transcriptional regulator ; transcriptional regulator ; DNA-binding response regulator in two-component regulatory system with CusS ; Transcriptional activator protein copR ; Transcriptional regulatory protein CusR ; MULTI…	106538	309	1	0.00676
copP	Cu	Metal	cation-transporting ATPase ; copper resistance protein CopZ ; heavy metal transport/detoxification protein ; copper-translocating P-type ATPase ; heavy metal-binding protein ; hypothetical protein ; copper chaperone ; MULTISPECIES: hypothetical protein	1348	22	0.76923	9.0E-5
copM	Cu	Metal	A Chain A, Copm In The Cu(i)-bound Form ; DUF305 domain-containing protein ; MULTISPECIES: hypothetical protein	1496	8	0.84615	9.0E-5
copG	Cu	Metal	copper amine oxidase ; metal-binding protein ; hypothetical protein A3E00_12275 ; hypothetical protein	2430	9	0.76923	0.00015
copF	Cu	Metal	copper-translocating P-type ATPase ; MULTISPECIES: copper-translocating P-type ATPase	94	5	0.46154	1.0E-5
copD	Cu	Metal	copper resistance protein CopD ; MULTISPECIES: copper resistance protein CopD ; MULTISPECIES: copper resistance protein D, component	18148	11	1	0.00115
copC	Cu	Metal	CopC domain-containing protein YobA ; Cu resistance protein	6996	13	1	0.00044
copB	Cu	Metal	cation-transporting ATPase ; heavy metal translocating P-type ATPase ; MULTISPECIES: copper-transporting ATPase ; MULTISPECIES: copper-translocating P-type ATPase ; copper-transporting P-type ATPase ; cadmium-translocating P-type ATPase ; copper transporting ATPase ; copper-translocating P-type ATPase ; ATPase ; copper-transporting ATPase ; copper resistance protein CopB ; copper-exporting P-type…	18628	75	1	0.00118
copA	Cu,Ag	Metal	Cu(2+)-binding/translocating P-type ATPase ; putative copper-translocating P-type ATPase ; MULTISPECIES: copper-exporting P-type ATPase CopA ; MULTISPECIES: copper-translocating P-type ATPase ; ATPase ; hypothetical protein AMK71_06350 ; ATPase P ; copper-exporting P-type ATPase CopA ; copper resistance system multicopper oxidase ; cadmium-translocating P-type ATPase ; MULTISPECIES: cadmium-trans…	122564	308	1	0.00778
cop-unnamed	Cu	Metal	copper oxidase ; transcriptional regulator ; MULTISPECIES: XRE family transcriptional regulator ; hypothetical protein HMPREF9701_02123 ; XRE family transcriptional regulator	474	7	0.76923	3.0E-5
comR/ycfQ	Cu	Metal	TetR/AcrR family transcriptional regulator ; TetR/AcrR family transcriptional regulator, partial ; MULTISPECIES: TetR/AcrR family transcriptional regulator	16310	13	1	0.00104
cmtR	Co,Ni	Metal	ArsR family transcriptional regulator	1342	5	0.92308	9.0E-5
cmeR	Sodium Cholate	Biocide	TetR/AcrR family transcriptional regulator ; multidrug efflux system CmeABC transcriptional regulator, TetR family	6750	33	0.92308	0.00043
cmeF	Ethidium Bromide,Acriflavine,SDS,Triton X-100,Tween 20,Empigen,Sodium Cholate,Sodium Glycocholate,Sodium Taurocholate,SDC,Sodium Chenodeoxycholate	Biocide	AcrB/AcrD/AcrF family protein	156	1	0.46154	1.0E-5
cmeC	Cu,Co,Sodium Chenodeoxycholate,Sodium Deoxycholate,Sodium Cholate,Sodium Taurocholate,SDS,Ethidium Bromide	Metal;Biocide	TolC family protein ; multidrug efflux system CmeABC, outer membrane lipoprotein CmeC	1414	9	0.84615	9.0E-5
cmeB	Cu,Co,Sodium Chenodeoxycholate,Sodium Deoxycholate,Sodium Cholate,Sodium Taurocholate,SDS,Ethidium Bromide,Acridine orange	Metal;Biocide	multidrug efflux RND transporter permease subunit	50	2	0.30769	3.17399e-6
cmeA	Cu,Co,Sodium Chenodeoxycholate,Sodium Deoxycholate,Sodium Cholate,Sodium Taurocholate,SDS,Ethidium Bromide	Metal;Biocide	efflux RND transporter periplasmic adaptor subunit ; multidrug efflux system CmeABC, periplasmic fusion protein CmeA	10188	3	0.92308	0.00065
chtS	Chlorhexidine	Biocide	signal transduction histidine kinase ; MULTISPECIES: sensor histidine kinase ; sensor histidine kinase ; Sensor histidine kinase	48166	164	0.92308	0.00306
chtR	Chlorhexidine	Biocide	MULTISPECIES: DNA-binding response regulator, partial ; DNA-binding response regulator ; Two-component response regulator ytsA ; MULTISPECIES: DNA-binding response regulator	34084	225	1	0.00216
chrR	Cr,Fe,H2O2,2,6-dichloroindophenol	Metal;Biocide	oxygen-insensitive NADPH nitroreductase ; MULTISPECIES: NAD(P)H-dependent oxidoreductase ; NADPH-dependent FMN reductase ; NADPH-dependent oxidoreductase ; MULTISPECIES: oxygen-insensitive NADPH nitroreductase ; nitroreductase A ; NAD(P)H-dependent oxidoreductase ; ACP phosphodiesterase	28874	96	0.92308	0.00183
chrC	Cr	Metal;Biocide	superoxide dismutase	92	1	0.38462	1.0E-5
chrB	Cr,Methyl Viologen,Menadione	Metal;Biocide	chromate resistance protein ; MULTISPECIES: chromate resistance protein	56	3	0.30769	3.55486e-6
chrA1	Cr	Metal	MULTISPECIES: chromate transporter ; chromate transporter	6560	7	0.76923	0.00042
chrA	Cr	Metal	MULTISPECIES: chromate transporter ; chromate transporter ; chromate efflux transporter family protein ; hypothetical protein	10938	30	0.84615	0.00069
cepA	Chlorhexidine	Biocide	cation-efflux pump FieF	3508	9	0.76923	0.00022
cdeA	Ethidium Bromide,Acriflavine	Biocide	MATE efflux family protein ; MATE family efflux transporter ; MULTISPECIES: MATE family efflux transporter ; Multidrug export protein MepA ; Putative drug/sodium antiporter, MATE family	13780	89	0.92308	0.00087
cadX	Cd,Zn	Metal	putative cadmium efflux system accessory protein ; transcriptional regulator ArsR family (plasmid) ; transcriptional regulator	1662	6	0.53846	0.00011
cadR	Cd	Metal	MULTISPECIES: Cd(II)/Pb(II)-responsive transcriptional regulator ; Cd(II)/Pb(II)-responsive transcriptional regulator	58	4	0.46154	3.68182e-6
cadD	Cd,Zn	Metal	MULTISPECIES: cadmium transporter ; cadmium transporter, partial ; cadmium transporter	2450	11	0.53846	0.00016
cadC	Cd,Bi,Zn,Pb	Metal	transcriptional regulator ; MULTISPECIES: transcriptional regulator	392	5	0.38462	2.0E-5
bmrR	Ethidium Bromide,Rhodamine 6G,Acridine Orange	Biocide	MULTISPECIES: MerR family transcriptional regulator ; multidrug transporter ; MerR family transcriptional regulator	7336	37	1	0.00047
bmr	Ethidium Bromide,Rhodamine 6G,Acridine Orange,CTM	Biocide	MFS transporter	40118	6	1	0.00255
bltR	Ethidium Bromide,Rhodamine 6G,Acridine Orange	Biocide	multidrug-efflux transporter 2 regulator ; BltR family transcriptional regulator ; MULTISPECIES: BltR family transcriptional regulator ; hypothetical protein ; transcriptional regulator	7728	61	0.92308	0.00049
bltD	Spermidine,Spermine	Biocide	spermidine acetyltransferase ; MULTISPECIES: N-acetyltransferase ; N-acetyltransferase ; GNAT family N-acetyltransferase	17718	81	1	0.00112
blt	Ethidium Bromide,Rhodamine 6G,Acridine Orange,TPP	Biocide	tetracycline resistance MFS efflux pump ; multidrug resistance protein B ; Metal-tetracycline/H(+) antiporter ; MFS transporter	39126	59	1	0.00248
bhsA/ycfr/comC	Cu	Metal	DUF1471 domain-containing protein ; multiple stress resistance protein BhsA ; MULTISPECIES: DUF1471 domain-containing protein	13388	14	0.92308	0.00085
bfrA	Fe	Metal	bacterioferritin ; MULTISPECIES: bacterioferritin	7400	11	1	0.00047
bexA	Ethidium Bromide	Biocide	Multidrug-efflux transporter ; hypothetical protein A3K10_05865 ; MULTISPECIES: MATE family efflux transporter ; MATE family efflux transporter ; hypothetical protein A2X00_07680 ; hypothetical protein A2W85_08740 ; mATE efflux family protein ; hypothetical protein A2X10_02720 ; multidrug transporter MatE	68724	102	0.92308	0.00436
bepG	SDC,SDS	Biocide	acriflavin resistance protein ; MULTISPECIES: multidrug efflux RND transporter permease subunit	1878	3	0.23077	0.00012
bepF	SDC,SDS	Biocide	MexE family multidrug efflux RND transporter periplasmic adaptor subunit	8784	1	0.61538	0.00056
bepE	SDC,Ethidium Bromide,Crystal Violet	Biocide	multidrug efflux RND transporter permease subunit ; hydrophobe/amphiphile efflux-1 family RND transporter	43940	9	0.92308	0.00279
bepC	CTM,Acriflavine,Crystal Violet, Ethidium Bromide,Rhodamine 6G,SDC,SDS	Biocide	transporter ; type I secretion outer membrane protein, TolC family ; hypothetical protein	13090	7	0.84615	0.00083
bcrA	BAC	Biocide	TetR/AcrR family transcriptional regulator	3574	6	0.69231	0.00023
bcr	Acriflavine	Biocide	MULTISPECIES: Bcr/CflA family drug resistance efflux transporter ; Bcr/CflA family multidrug efflux MFS transporter ; bicyclomycin resistance protein ; bicyclomycin/cysteine/sulfonamide efflux transporter ; Bcr/CflA family drug resistance efflux transporter ; MULTISPECIES: Bcr/CflA family multidrug efflux MFS transporter	154398	234	1	0.0098
baeS	Zn,W,SDC	Metal;Biocide	MULTISPECIES: two-component system sensor histidine kinase BaeA ; Multidrug transporter MdtD ; two-component system sensor kinase ; two-component system sensor histidine kinase BaeA	100940	152	1	0.00641
baeR	Zn,W,SDC	Metal;Biocide	MULTISPECIES: two-component system response regulator BaeR ; two-component system response regulator BaeR ; DNA-binding response regulator	82680	147	1	0.00525
asr	HCl	Biocide	acid-shock protein ; acid shock protein ; hypothetical protein predicted by Glimmer/Critica	5368	9	0.92308	0.00034
arsT	As	Metal	thioredoxin-disulfide reductase ; thioredoxin reductase ; thioredoxin reductase (NADPH) ; MULTISPECIES: thioredoxin-disulfide reductase ; Thioredoxin reductase ; hypothetical protein ; thioredoxin-disulfide reductase, partial	200156	346	1	0.01271
arsR	As,Sb,Bi	Metal	transcriptional regulator, ArsR family ; MULTISPECIES: transcriptional regulator ; ArsR regulatory protein (plasmid) ; hypothetical protein B4140_0809 ; MULTISPECIES: ArsR family transcriptional regulator ; transcriptional regulator ; ArsR family transcriptional regulator	15620	6	1	0.00099
arsR	As	Metal	transcriptional regulator, ArsR family ; MULTISPECIES: transcriptional regulator ; ArsR regulatory protein (plasmid) ; hypothetical protein B4140_0809 ; MULTISPECIES: ArsR family transcriptional regulator ; transcriptional regulator ; ArsR family transcriptional regulator	15620	80	1	0.00099
arsP	As	Metal	permease ; MULTISPECIES: permease	20882	25	1	0.00133
arsM	As	Metal	methylase ; hypothetical protein A3K76_05695 ; TPA: arsenite S-adenosylmethyltransferase ; arsenite S-adenosylmethyltransferase ; GNAT family N-acetyltransferase ; methyltransferase type 11 ; hypothetical protein A3K12_07575 ; poly polymerase 2 ADP-ribosyltransferase 2 ; methylase involved in ubiquinone/menaquinone biosynthesis ; hypothetical protein M408DRAFT_81849 ; hypothetical protein ; MULTI…	81660	74	1	0.00518
arsH	As	Biocide	PREDICTED: uncharacterized protein LOC102318278 ; arsenical resistance protein ArsH, partial ; arsenical resistance protein ArsH ; MULTISPECIES: arsenical resistance protein ArsH	3066	14	0.76923	0.00019
arsD	As	Metal	arsenical resistance operon transcriptional repressor ArsD ; MULTISPECIES: arsenical resistance operon transcriptional repressor ArsD ;A Chain A, The 1.4 Ang Crystal Structure Of The Arsd Arsenic Metallochaperone Provides Insights Into Its Interactions With The Arsa Atpase	2580	11	0.84615	0.00016
arsC	As	Metal	MULTISPECIES: arsenate reductase (thioredoxin) ; arsenate reductase (glutaredoxin) ; arsenate reductase ArsC ; arsenate reductase ; MULTISPECIES: arsenate reductase ArsC ; protein-tyrosine-phosphatase ; hypothetical protein A3H94_02130 ; hypothetical protein CFK49_10210 ; MULTISPECIES: arsenate reductase (glutaredoxin) ; arsenate reductase (thioredoxin) ; arsenite methyltransferase	27320	81	1	0.00173
arsB	As,Sb	Metal	arsenical pump membrane protein ; arsenical efflux pump membrane protein ArsB ; MULTISPECIES: arsenic transporter ; MULTISPECIES: arsenical-resistance protein ; arsenical-resistance protein ; Arsenic efflux pump protein ; arsenic transporter ; bile acid:sodium symporter ; arsenite transporter, ACR3 family ; MULTISPECIES: arsenical efflux pump membrane protein ArsB	32410	61	1	0.00206
arsA	As,Sb	Metal	MULTISPECIES: arsenical pump-driving ATPase ; arsenic ABC transporter ATPase ; Arsenical pump-driving ATPase ; arsenical pump-driving ATPase	11184	31	1	0.00071
arrB	As	Metal	4Fe-4S ferredoxin ; oxidoreductase iron-sulfur subunit ; prokaryotic molybdopterin-containing oxidoreductase family, iron-sulfur binding subunit, partial ; hypothetical protein	194822	107	1	0.01237
arrA	As	Metal	dehydrogenase ; hypothetical protein ; molybdopterin oxidoreductase ; arsenate respiratory reductase	169670	85	1	0.01077
amvA	Acriflavine,Chlorhexidine,Methyl Viologen,BAC,TPP,Ethidium Bromide,SDC	Biocide	methyl viologen resistance protein SmvA ; transporter, major facilitator family protein ; MFS transporter	6762	6	0.69231	0.00043
aioS/aoxS	As	Metal	MULTISPECIES: sensor histidine kinase	30	1	0.07692	1.90439e-6
aioR/aoxR	As	Metal	MULTISPECIES: sigma-54-dependent Fis family transcriptional regulator ; sigma-54-dependent Fis family transcriptional regulator	1926	12	0.84615	0.00012
aioE	As	Metal	NAD(P)/FAD-dependent oxidoreductase ; pyridine nucleotide-disulfide oxidoreductase	5378	15	1	0.00034
aioB/aoxA	As	Metal	arsenate reductase (azurin) small subunit	1058	7	0.69231	7.0E-5
aioA/aoxB	As	Metal	arsenite oxidase large subunit ; arsenate reductase (azurin) large subunit ; MULTISPECIES: arsenate reductase (azurin) large subunit	44800	42	1	0.00284
adeN	Safranin O,Acridine Orange,Pyronin Y,SDS	Biocide	TetR/AcrR family transcriptional regulator	1478	5	0.84615	9.0E-5
adeL	SDS,Ethidium Bromide,Safranin O,Acridine Orange	Biocide	MULTISPECIES: LysR family transcriptional regulator ; transcriptional regulator, LysR family ; LysR family transcriptional regulator	237794	220	1	0.0151
adeK	Acridine Orange,Safranin O,Pyronin Y,SDS	Biocide	AdeC/AdeK/OprM family multidrug efflux complex outer membrane factor ; MULTISPECIES: multidrug efflux RND transporter AdeIJK outer membrane channel subunit AdeK ; multidrug efflux RND transporter AdeIJK outer membrane channel subunit AdeK	638	4	0.30769	4.0E-5
adeJ	Acridine Orange,Safranin O,Pyronin Y,SDS	Biocide	AcrB/AcrD/AcrF family protein ; multidrug efflux RND transporter permease subunit	568	2	0.30769	4.0E-5
adeI	Acridine Orange,Safranin O,Pyronin Y,SDS,Acriflavine,BAC,Chlorhexidine,Crystal Violet,DAPI,SDC,Ethidium Bromide,Methyl Viologen,Rhodamine 123,TPP,Synergize,Virkon S,Wex-cide-128	Biocide	efflux RND transporter periplasmic adaptor subunit	6346	4	0.69231	0.0004
adeH	SDS,Ethidium Bromide,Safranin O,Acridine Orange	Biocide	MULTISPECIES: RND transporter ; RND transporter	168	3	0.46154	1.0E-5
adeF	SDS,Ethidium Bromide,Safranin O,Acridine Orange	Biocide	efflux RND transporter periplasmic adaptor subunit ; MexE family multidrug efflux RND transporter periplasmic adaptor subunit	29624	11	1	0.00188
adeE	Ethidium Bromide,Acriflavine	Biocide	multidrug efflux RND transporter permease subunit	284	5	0.38462	2.0E-5
adeD	Ethidium Bromide	Biocide	efflux RND transporter periplasmic adaptor subunit ; MULTISPECIES: efflux RND transporter periplasmic adaptor subunit	112	2	0.23077	1.0E-5
adeA	Pyronin Y,SDS,Acriflavine,BAC,Chlorhexidine,DAPI,SDC, Ethidium Bromide,Methyl Viologen,TPP,Rhodamine 123,Synergize,Wex-cide-128	Biocide	AdeA/AdeI family multidrug efflux RND transporter periplasmic adaptor subunit	590	1	0.23077	4.0E-5
actS	Cd,Zn,HCl,Sodium azide	Metal;Biocide	sensor histidine kinase	26	1	0.15385	1.65047e-6
actR	Cd,Zn,HCl,Sodium azide	Metal;Biocide	DNA-binding response regulator	2930	9	0.76923	0.00019
actP/yjcG	Sodium Glycocholate,Sodium acetate	Biocide	cation/acetate symporter ActP ; MULTISPECIES: cation/acetate symporter ActP	13346	12	0.92308	0.00085
actP	Te	Metal;Biocide	cation acetate symporter ; MULTISPECIES: copper-translocating P-type ATPase ; Copper-transporting P-type ATPase ; ATPase P ; copper-translocating P-type ATPase ; MULTISPECIES: cation/acetate symporter ActP ; SSS sodium solute transporter	23880	2	0.92308	0.00152
actP	Cu,Sodium acetate	Metal;Biocide	cation acetate symporter ; MULTISPECIES: copper-translocating P-type ATPase ; Copper-transporting P-type ATPase ; ATPase P ; copper-translocating P-type ATPase ; MULTISPECIES: cation/acetate symporter ActP ; SSS sodium solute transporter	23880	30	0.92308	0.00152
actA	Cu,Zn,HCl	Metal;Biocide	apolipoprotein N-acyltransferase	656	8	0.61538	4.0E-5
acrR/ybaH	Acriflavine	Biocide	DNA-binding transcriptional repressor AcrR, partial ; DNA-binding transcriptional repressor ; MULTISPECIES: DNA-binding transcriptional repressor AcrR ; DNA-binding transcriptional repressor AcrR	30602	41	1	0.00194
acrF/envD	Acriflavine,SDS,SDC,TPP,BAC,Methyl Viologen,Ethidium Bromide	Biocide	AcrB/AcrD/AcrF family protein ; multidrug efflux RND transporter permease subunit ; hydrophobe/amphiphile efflux-1 family RND transporter ; MULTISPECIES: multidrug efflux RND transporter permease subunit	28740	6	0.92308	0.00182
acrE/envC	Acriflavine,SDS,SDC,TPP,BAC,Methyl Viologen,Ethidium Bromide	Biocide	MexX family efflux pump subunit ; efflux RND transporter periplasmic adaptor subunit	25804	10	1	0.00164
acrD/yffA	SDS,SDC	Biocide	multidrug efflux RND transporter permease subunit ; MULTISPECIES: multidrug efflux RND transporter permease subunit	21562	3	1	0.00137
acrD	Cu,Zn	Metal	aminoglycoside/multidrug transporter subunit AcrD ; multidrug efflux RND transporter permease subunit ; hydrophobe/amphiphile efflux-1 family RND transporter ; MULTISPECIES: multidrug efflux RND transporter permease subunit	1368	7	0.53846	9.0E-5
acrB	Acriflavine,Phenol,Triclosan,p-xylene,Cyclohexane,Pentane	Biocide	multidrug efflux RND transporter permease subunit ; hydrophobe/amphiphile efflux-1 family RND transporter ; MULTISPECIES: multidrug efflux RND transporter permease subunit	32402	10	1	0.00206
acrA	Acriflavine,Phenol,Triclosan,p-xylene,Cyclohexane,Pentane	Biocide	acriflavine resistance protein A ; multidrug transporter ; MULTISPECIES: MexE family multidrug efflux RND transporter periplasmic adaptor subunit ; efflux transporter periplasmic adaptor subunit	25770	8	1	0.00164
acr3	As	Metal	arsenical-resistance protein	1742	12	0.84615	0.00011
acn	Fe	Metal	iron-regulated aconitate hydratase acn ; MULTISPECIES: aconitate hydratase ; aconitate hydratase ; MULTISPECIES: aconitate hydratase AcnA ; aconitate hydratase 1 ; aconitate hydratase AcnA ; aconitate hydratase A	49534	96	1	0.00314
abeS	BAC,Ethidium Bromide,Acriflavine,Chlorhexidine,Pyronin Y,Rhodamine 6G,Methyl Viologen,TPP,DAPI,Acridine Orange,SDS,SDC,Crystal Violet,CTM,CPC,QACs	Biocide	MULTISPECIES: QacE family quaternary ammonium compound efflux SMR transporter ; QacE family quaternary ammonium compound efflux SMR transporter ; multidrug transporter ; hypothetical protein	2392	14	0.92308	0.00015
abeM	DAPI,Triclosan,Acriflavine,Hoechst 33342,Rhodamine 6G,Ethidium Bromide,TPP	Biocide	MATE family efflux transporter	640	3	0.53846	4.0E-5
PA0320	Cd,Hg,TBT,H2O2,HCl	Metal;Biocide	MULTISPECIES: TIGR00156 family protein ; hypothetical protein ; TIGR00156 family protein	1442	7	0.84615	9.0E-5
G2alt	Al	Metal	7-cyano-7-deazaguanine synthase QueC ; 7-cyano-7-deazaguanine synthase	8780	7	0.92308	0.00056
ALU1-P	Al	Metal	7-cyano-7-deazaguanine synthase QueC ; MULTISPECIES: 7-cyano-7-deazaguanine synthase QueC	5812	17	0.92308	0.00037

## Sheet: Table S8. PHI-base annotated pa
Protein_ID	PHI_ID	Pathogen_gene	Function	Pathogen_NCBI_species_Taxonomy ID	Pathogen_species	Host_NCBI_Taxonomy_ID	Experiment_host_species	Host_classification	Mutant_phenotype	Total_reads	Gene_Count
G4NDE1	PHI:1017;PHI:2067	ABC4	multidrug resistance;ABC Transporter	318829	Magnaporthe oryzae	4513	Hordeum vulgare (related: barley)	Monocots	reduced virulence;loss of pathogenicity	56426	76
G4NDE1	PHI:1017;PHI:2067	ABC4	multidrug resistance;ABC Transporter	318829	Magnaporthe oryzae	4513	Hordeum vulgare (related: barley)	Monocots	reduced virulence;loss of pathogenicity	56426	33
Q3Y5V5	PHI:1018;PHI:2042	ABC3	MDR Transporter;multidrug resistance;protection from oxidative stress	318829	Magnaporthe oryzae	4513;4530	Hordeum vulgare (related: barley);Oryza sativa (related: rice)	Monocots	loss of pathogenicity	119914	75
A0ST45	PHI:1048	CTB7	oxidoreductase	29003	Cercospora nicotianae	4097	Nicotiana tabacum (related: common tobacco)	Eudicots	reduced virulence	14	1
P78585	PHI:1026	bcplc1	Phospholipase C	40559	Botrytis cinerea	3885	Phaseolus vulgaris (related: kidney bean)	Eudicots	reduced virulence	86	2
Q2Q466	PHI:1063	MNH6	nonhistone protein containing an HMG1 box	318829	Magnaporthe oryzae	4513;4530	Hordeum vulgare (related: barley);Oryza sativa (related: rice)	Monocots	reduced virulence	40	1
I1RNF9	PHI:1012	GzGPA1	G protein alpha subunit	5518	Fusarium graminearum	4513	Hordeum vulgare (related: barley)	Monocots	unaffected pathogenicity	10	2
B9DR51	PHI:1133	Lmepi	UDP-4-Galactose epimerase	5022	Leptosphaeria maculans	3708	Brassica napus (related: rape)	Eudicots	loss of pathogenicity	3640	3
I1RXX1	PHI:1006	HMR1	HMG-CoA Reductase	5518	Fusarium graminearum	4564	Triticum (related: wheat)	Monocots	reduced virulence	614	2
I1RJS2	PHI:1015	GzGPB1	G protein beta subunit	5518	Fusarium graminearum	4513	Hordeum vulgare (related: barley)	Monocots	reduced virulence	20	1
V6RAJ2	PHI:1016;PHI:1191;PHI:3376	STE11;FgSte11;(Sc Ste11)	MAPKKK;fungal development and pathogenicity;protein kinase	5518	Fusarium graminearum	4565	Triticum aestivum (related: bread wheat)	Monocots	reduced virulence;loss of pathogenicity	50	1
I1S077	PHI:1210	FGSG_10095	protein kinase	5518	Fusarium graminearum	4564	Triticum (related: wheat)	Monocots	reduced virulence	244	5
I1RV69	PHI:1234	FGSG_08133	protein kinase	5518	Fusarium graminearum	4564	Triticum (related: wheat)	Monocots	lethal	152	4
I1S1V3	PHI:1238	FGSG_10725	protein kinase	5518	Fusarium graminearum	4564	Triticum (related: wheat)	Monocots	lethal	448	2
I1RWG2	PHI:1242	FGSG_08631	protein kinase	5518	Fusarium graminearum	4564	Triticum (related: wheat)	Monocots	unaffected pathogenicity	32	1
I1RSF7	PHI:1385	GzC2H048	transcription factor	5518	Fusarium graminearum	4564	Triticum (related: wheat)	Monocots	unaffected pathogenicity	74236	44
I1RX64	PHI:1407	GzC2H071	transcription factor	5518	Fusarium graminearum	4564	Triticum (related: wheat)	Monocots	lethal	6746	17
Q9UVN7	PHI:142;PHI:2366;PHI:2398	CHK1;Chk1	MAP Kinases;-;MAP kinase	5016	Bipolaris maydis	4577	Zea mays (related: maize)	Monocots	reduced virulence	28	1
I1S8E5	PHI:1433	GzC2H102	transcription factor	5518	Fusarium graminearum	4564	Triticum (related: wheat)	Monocots	unaffected pathogenicity	556	7
I1S2F2	PHI:1500	GzHMG032	transcription factor	5518	Fusarium graminearum	4564	Triticum (related: wheat)	Monocots	unaffected pathogenicity	376	4
I1RPZ1	PHI:1517	GzHOMEL013	transcription factor	5518	Fusarium graminearum	4564	Triticum (related: wheat)	Monocots	lethal	88	1
I1RE51	PHI:1542	GzMyb006	transcription factor	5518	Fusarium graminearum	4564	Triticum (related: wheat)	Monocots	unaffected pathogenicity	4	1
I1RC95	PHI:1566	GzOB006	transcription factor	5518	Fusarium graminearum	4564	Triticum (related: wheat)	Monocots	lethal	55062	87
I1RCB7	PHI:1567	GzOB007	transcription factor	5518	Fusarium graminearum	4564	Triticum (related: wheat)	Monocots	unaffected pathogenicity	26	1
I1RE94	PHI:1572	GzOB012	transcription factor	5518	Fusarium graminearum	4564	Triticum (related: wheat)	Monocots	unaffected pathogenicity	5774	10
O59918	PHI:158	UKC1	Protein kinase	5270	Ustilago maydis	4577	Zea mays (related: maize)	Monocots	reduced virulence	108	4
V6RLW4	PHI:1583	GzOB023	transcription factor	5518	Fusarium graminearum	4564	Triticum (related: wheat)	Monocots	unaffected pathogenicity	174	2
I1RX22	PHI:1595	GzOB035	transcription factor	5518	Fusarium graminearum	4564	Triticum (related: wheat)	Monocots	unaffected pathogenicity	8568	3
I1RAH2	PHI:1629	GzWing001	transcription factor	5518	Fusarium graminearum	4564	Triticum (related: wheat)	Monocots	unaffected pathogenicity	112	1
I1REJ1	PHI:1662	GzCCHC002	transcription factor	5518	Fusarium graminearum	4564	Triticum (related: wheat)	Monocots	unaffected pathogenicity	570	2
Q9UVG2	PHI:177	ODC	Ornithine decarboxylase	13684	Parastagonospora nodorum	4564	Triticum (related: wheat)	Monocots	reduced virulence	172	5
I1S053	PHI:1772	GzZC087	transcription factor	5518	Fusarium graminearum	4564	Triticum (related: wheat)	Monocots	reduced virulence	40820	12
G4MS03	PHI:2006;PHI:2008	HST1	Histone Deacetylation	318829	Magnaporthe oryzae	4513	Hordeum vulgare (related: barley)	Monocots	unaffected pathogenicity	966	5
G4NGA7	PHI:2032	VTL1	intracellular triacylglycerol lipases	318829	Magnaporthe oryzae	4530	Oryza sativa (related: rice)	Monocots	unaffected pathogenicity	408	2
G4NBI6	PHI:2033	MgPex6	peroxisome biogenesis	318829	Magnaporthe oryzae	4530	Oryza sativa (related: rice)	Monocots	loss of pathogenicity	66	3
G4MNA5	PHI:2096	Calcium-transporting ATPase 3	Ca2+ pump	318829	Magnaporthe oryzae	4513;4564	Hordeum vulgare (related: barley);Triticum (related: wheat)	Monocots	loss of pathogenicity	234	2
G4N178	PHI:2153;PHI:2356	MoHYR1;MoHyr1	Plant virulence;-	318829	Magnaporthe oryzae	4513	Hordeum vulgare (related: barley)	Monocots	reduced virulence	4662	12
G4MQP9	PHI:2177	PAS1	Transcription factor	318829	Magnaporthe oryzae	4530	Oryza sativa (related: rice)	Monocots	unaffected pathogenicity	582	8
Q9HFW0	PHI:227	PKA1	-;Cyclic AMP dependent protein kinase	5207	Cryptococcus neoformans	9986;10090;6239;7227;7137	Oryctolagus cuniculus (related: rabbit);Mus musculus (related: house mouse);Caenorhabditis elegans (related: roundworm);Drosophila melanogaster (related: fruit fly);Galleria mellonella (related: greater wax moth)	Rabbits & hares;Rodents;Nematodes;Flies;Moths	reduced virulence;loss of pathogenicity	72	2
D2IV71	PHI:2303	AaFUS3	-	5599	Alternaria alternata	229630	Citrus x tangelo (related: tangelo)	Eudicots	loss of pathogenicity	42	1
I1S1U7	PHI:2352;PHI:2354	AMT2	Arginine Methyltransferase	5518	Fusarium graminearum	4577;4564	Zea mays (related: maize);Triticum (related: wheat)	Monocots	unaffected pathogenicity;reduced virulence	1368	1
Q6QIY0	PHI:2382	Upa2	Protein phosphatase	5270	Ustilago maydis	4577	Zea mays (related: maize)	Monocots	unaffected pathogenicity	244	6
D2X3B5	PHI:2414	AaGa1	Class I Ga subunit of the GTP-binding protein	5599	Alternaria alternata	229630	Citrus x tangelo (related: tangelo)	Eudicots	unaffected pathogenicity	6	1
P57063	PHI:2416	tatB	virulence;Translocate folded proteins	666	Vibrio cholerae	10090	Mus musculus (related: house mouse)	Rodents	reduced virulence	80	2
I1RZC6	PHI:1088	FGSG_09759	Putative cation efflux family	5518	Fusarium graminearum	4564	Triticum (related: wheat)	Monocots	unaffected pathogenicity	5196	4
C6KEF5	PHI:1076;PHI:2127	STE20;MGSTE20p	-	1047171	Zymoseptoria tritici	4564	Triticum (related: wheat)	Monocots	unaffected pathogenicity	68	2
Q99079	PHI:100	ADR1	PKA catalytic subunit	5270	Ustilago maydis	4577	Zea mays (related: maize)	Monocots	loss of pathogenicity	18	1
O42620	PHI:120;PHI:594	PTH2;CrAT1 (PTH2)	carnitine-dependent acetyl unit transport from peroxisomes;Carnitine acetyl transferase	318829	Magnaporthe oryzae	4513	Hordeum vulgare (related: barley)	Monocots	loss of pathogenicity	154	1
V6RAJ2	PHI:1016;PHI:1191;PHI:3376	STE11;FgSte11;(Sc Ste11)	MAPKKK;fungal development and pathogenicity;protein kinase	5518	Fusarium graminearum	4565	Triticum aestivum (related: bread wheat)	Monocots	reduced virulence;loss of pathogenicity	50	1
Q99079	PHI:100	ADR1	PKA catalytic subunit	5270	Ustilago maydis	4577	Zea mays (related: maize)	Monocots	loss of pathogenicity	18	1
P87248	PHI:109	CLK1	Protein kinase (Ser/thr)	290576	Colletotrichum lindemuthianum	3885	Phaseolus vulgaris (related: kidney bean)	Eudicots	reduced virulence	480	2
B2SRG1	PHI:1141	raxB	ATP-binding transporter protein required for Ax21 activity	347	Xanthomonas oryzae	4530	Oryza sativa (related: rice)	Monocots	increased virulence (hypervirulence)	93688	18
A4ZGP3	PHI:1161	MgMfs1	major facilitator superfamily transporter	1047171	Zymoseptoria tritici	4564	Triticum (related: wheat)	Monocots	unaffected pathogenicity;chemistry target: sensitivity to chemical	5940	1
I1RNG8	PHI:1176	(Sc Atg1)	protein kinase	5518	Fusarium graminearum	4564	Triticum (related: wheat)	Monocots	reduced virulence	74	2
I1RGD6	PHI:1193	(Sc Sky1)	protein kinase	5518	Fusarium graminearum	4564	Triticum (related: wheat)	Monocots	reduced virulence	52	3
I1RMV6	PHI:1222	FGSG_05306	protein kinase	5518	Fusarium graminearum	4564	Triticum (related: wheat)	Monocots	lethal	78	1
Q4IB89	PHI:1224	FGSG_05519	protein kinase	5518	Fusarium graminearum	4564	Triticum (related: wheat)	Monocots	lethal	100	1
I1RUG2	PHI:1233	FGSG_07855	protein kinase	5518	Fusarium graminearum	4564	Triticum (related: wheat)	Monocots	lethal	90	1
I1RWQ2	PHI:1235	FGSG_08731	protein kinase	5518	Fusarium graminearum	4564	Triticum (related: wheat)	Monocots	lethal	306	4
I1RSK0	PHI:1257	FGSG_07121	protein kinase	5518	Fusarium graminearum	4564	Triticum (related: wheat)	Monocots	unaffected pathogenicity	196	5
I1RRX4	PHI:1291	TOP1	Topoisomerase I required to relac supercoilded DNA	5518	Fusarium graminearum	4564	Triticum (related: wheat)	Monocots	reduced virulence	2	1
I1RWF1	PHI:1403	GzC2H066	transcription factor	5518	Fusarium graminearum	4564	Triticum (related: wheat)	Monocots	reduced virulence	1230	14
O93886	PHI:141	CFP	Cercosporin secretion	84275	Cercospora kikuchii	3847	Glycine max (related: soybean)	Eudicots	reduced virulence	44	1
I1RST1	PHI:1491	GzHMG023	transcription factor	5518	Fusarium graminearum	4564	Triticum (related: wheat)	Monocots	lethal	20	1
Q4IPC8	PHI:1531;PHI:5700	GzSsu72;ScOrtholog_SSU72	transcription factor;-	5518	Fusarium graminearum	4565	Triticum aestivum (related: bread wheat)	Monocots	lethal;unaffected pathogenicity	34	1
I1RAX7	PHI:1563	GzOB003	transcription factor	5518	Fusarium graminearum	4564	Triticum (related: wheat)	Monocots	unaffected pathogenicity	42	1
I1RCH5	PHI:1569	GzOB009	transcription factor	5518	Fusarium graminearum	4564	Triticum (related: wheat)	Monocots	lethal	29466	4
I1RX22	PHI:1595	GzOB035	transcription factor	5518	Fusarium graminearum	4564	Triticum (related: wheat)	Monocots	unaffected pathogenicity	8568	11
I1S1V9	PHI:1604	GzOB045	transcription factor	5518	Fusarium graminearum	4564	Triticum (related: wheat)	Monocots	unaffected pathogenicity	298	7
I1RS37	PHI:1643	GzWing015	transcription factor	5518	Fusarium graminearum	4564	Triticum (related: wheat)	Monocots	reduced virulence	290	2
Q4I8B6	PHI:1675	GzDHHC003	transcription factor	5518	Fusarium graminearum	4564	Triticum (related: wheat)	Monocots	unaffected pathogenicity	88	2
Q00663	PHI:17	ACP	Acid proteinase	5482	Candida tropicalis	10090	Mus musculus (related: house mouse)	Rodents	reduced virulence	10	1
Q99324	PHI:191	TOM1	Tomatinase	39703	Septoria lycopersici	4081	Solanum lycopersicum (related: tomato)	Eudicots	unaffected pathogenicity	47056	4
G4NGZ9	PHI:2051	COS1	Transcriptional regulator	318829	Magnaporthe oryzae	4513;4530	Hordeum vulgare (related: barley);Oryza sativa (related: rice)	Monocots	increased virulence (hypervirulence)	64	1
G4N168	PHI:2063;PHI:2110	MCNA;MGG_07456.5	Serine/threonine-protein phosphatase 2B catalytic subunit;-	318829	Magnaporthe oryzae	4513;4564	Hordeum vulgare (related: barley);Triticum (related: wheat)	Monocots	unaffected pathogenicity;reduced virulence	104	1
G4N168	PHI:2063;PHI:2110	MCNA;MGG_07456.5	Serine/threonine-protein phosphatase 2B catalytic subunit;-	318829	Magnaporthe oryzae	4513;4564	Hordeum vulgare (related: barley);Triticum (related: wheat)	Monocots	unaffected pathogenicity;reduced virulence	104	2
Q4P9P1	PHI:2237	Rbf1	zinc-finger transcription factor	5270	Ustilago maydis	4577	Zea mays (related: maize)	Monocots	loss of pathogenicity	2092	32
Q9C1R5	PHI:232	STE12a	Regulates mRNA levels	5207	Cryptococcus neoformans	10090	Mus musculus (related: house mouse)	Rodents	reduced virulence	14	1
E9F082	PHI:2323	mhk1	Group III histidine kinase	568076	Metarhizium robertsii	7067	Tenebrio molitor (related: yellow mealworm)	Beetles	reduced virulence	1624	5
D2E9W8	PHI:2377	DEP3	Histone Deacetylase Inhibitor	29001	Alternaria brassicicola	3702;3712	Arabidopsis thaliana (related: thale cress);Brassica oleracea (no common name found)	Eudicots	unaffected pathogenicity;reduced virulence	1150	4
Q00903	PHI:24	Avenacinase	Avenacinase	29850	Gaeumannomyces graminis	4564;4498	Triticum (related: wheat);Avena sativa (related: oat)	Monocots	unaffected pathogenicity;loss of pathogenicity	39788	2
C5J0G7	PHI:1075;PHI:2126	STE12;MGSTE12p	Transcription factor;-	1047171	Zymoseptoria tritici	4564	Triticum (related: wheat)	Monocots	reduced virulence	160	2
I1RWM5	PHI:1184;PHI:6974	(Sc Gin4-like);gil1	Protein kinase;protein kinase	5518	Fusarium graminearum	4565;4577	Triticum aestivum (related: bread wheat);Zea mays (related: maize)	Monocots	reduced virulence	6	1
I1RFC7	PHI:1239	FGSG_02399	protein kinase	5518	Fusarium graminearum	4564	Triticum (related: wheat)	Monocots	unaffected pathogenicity	86	1
I1RH87	PHI:1266;PHI:4942	FGSG_03132;cdc2B	Cell cycle progression;protein kinase	5518	Fusarium graminearum	4565	Triticum aestivum (related: bread wheat)	Monocots	lethal;unaffected pathogenicity	20	1
I1RN43	PHI:1268	FGSG_05406	protein kinase	5518	Fusarium graminearum	4564	Triticum (related: wheat)	Monocots	unaffected pathogenicity	38	1
O93842	PHI:131	TRI12	Toxin efflux pump	5514	Fusarium sporotrichioides	4564	Triticum (related: wheat)	Monocots	unaffected pathogenicity	314	1
Q5AHA0	PHI:136	CaHK1 (CHK1)	Histidine Kinase	5476	Candida albicans	10114;10090	Rattus (related: rat);Mus musculus (related: house mouse)	Rodents	unaffected pathogenicity;reduced virulence;loss of pathogenicity	164	1
I1RT19	PHI:1387	GzBrlA	transcription factor	5518	Fusarium graminearum	4564	Triticum (related: wheat)	Monocots	unaffected pathogenicity	6	1
Q92207	PHI:149	HOG1	MAP Kinase	5476	Candida albicans	10090	Mus musculus (related: house mouse)	Rodents	reduced virulence	66	2
I1RE46	PHI:1570	GzOB010	transcription factor	5518	Fusarium graminearum	4564	Triticum (related: wheat)	Monocots	unaffected pathogenicity	196	4
I1RM25	PHI:1579	GzOB019	transcription factor	5518	Fusarium graminearum	4564	Triticum (related: wheat)	Monocots	unaffected pathogenicity	44838	18
O74686	PHI:159	URA5	Pyrimidine biosynthesis	5037	Histoplasma capsulatum	10090	Mus musculus (related: house mouse)	Rodents	loss of pathogenicity	10700	1
I1REJ1	PHI:1662	GzCCHC002	transcription factor	5518	Fusarium graminearum	4564	Triticum (related: wheat)	Monocots	unaffected pathogenicity	570	1
Q4HWE2	PHI:1671	GzCCHC011	transcription factor	5518	Fusarium graminearum	4564	Triticum (related: wheat)	Monocots	reduced virulence	106	2
G4MPI2	PHI:2009	HOS4	Histone Deacetylation	318829	Magnaporthe oryzae	4513	Hordeum vulgare (related: barley)	Monocots	unaffected pathogenicity	16	1
G4NCA2	PHI:2016	PTH2	lipid reserve mobilization;Peroxisomal carnitine acetyl transferase	318829	Magnaporthe oryzae	4513;4530	Hordeum vulgare (related: barley);Oryza sativa (related: rice)	Monocots	loss of pathogenicity	84	1
G4MWU9	PHI:2019	MoPLC3	-	318829	Magnaporthe oryzae	4530	Oryza sativa (related: rice)	Monocots	loss of pathogenicity	56	2
G4NC11	PHI:2052	Cdc42	actin cytoskeleton organization and cell polarity;establishment of turgor in appressoria	318829	Magnaporthe oryzae	4530	Oryza sativa (related: rice)	Monocots	reduced virulence	54	3
A7U5U4	PHI:2058	LHS1	Endoplasmic Reticulum Chaperone	318829	Magnaporthe oryzae	4530	Oryza sativa (related: rice)	Monocots	reduced virulence	7936	3
G4MW66	PHI:2062;PHI:3815	Gph1;GPH1	-;Phosphorylase	318829	Magnaporthe oryzae	4513;4530	Hordeum vulgare (related: barley);Oryza sativa (related: rice)	Monocots	unaffected pathogenicity;reduced virulence;loss of pathogenicity	62558	48
C4YFX2	PHI:211;PHI:6806	tup1;CaTUP1	Transcription factor;Transcriptional repressor	5476	Candida albicans	9606	Homo sapiens (related: human)	Primates	reduced virulence	210	2
G4N2B2	PHI:2128	MoHox1	-	318829	Magnaporthe oryzae	4530	Oryza sativa (related: rice)	Monocots	reduced virulence	56	2
G4MUF4	PHI:2143	MoVPR	minor extracellular protease-encoding gene	318829	Magnaporthe oryzae	4530	Oryza sativa (related: rice)	Monocots	reduced virulence	1400	2
G4N7T3	PHI:2162;PHI:7725	CPKA;cpkA	Catalytic subunit of cyclic AMP-protein kinase A;-	318829	Magnaporthe oryzae	4513;4530	Hordeum vulgare (related: barley);Oryza sativa (related: rice)	Monocots	unaffected pathogenicity;reduced virulence	30	1
Q9HFU4	PHI:220	MAN1	Phosphomannose isomerase	5207	Cryptococcus neoformans	9986;10090	Oryctolagus cuniculus (related: rabbit);Mus musculus (related: house mouse)	Rabbits & hares;Rodents	reduced virulence	16860	1
Q04802	PHI:221	NAG1	Glucosamine-6-phosphate deaminase	5476	Candida albicans	10090	Mus musculus (related: house mouse)	Rodents	reduced virulence	14956	7
Q6Q487	PHI:2306	clxA	Lectin chaperone	746128	Aspergillus fumigatus	10090	Mus musculus (related: house mouse)	Rodents	unaffected pathogenicity	84	2
Q4WR83	PHI:2321	SidI	Acyl-CoA ligase	746128	Aspergillus fumigatus	10090	Mus musculus (related: house mouse)	Rodents	reduced virulence	48248	5
Q4WF54	PHI:2322	SidH	Anoyl-CoA hydratase	746128	Aspergillus fumigatus	10090	Mus musculus (related: house mouse)	Rodents	reduced virulence	796	2
D2E9W8	PHI:2377	DEP3	Histone Deacetylase Inhibitor	29001	Alternaria brassicicola	3702;3712	Arabidopsis thaliana (related: thale cress);Brassica oleracea (no common name found)	Eudicots	unaffected pathogenicity;reduced virulence	1150	1
B2SI03	PHI:1138	raxP (cysD)	Sulfate adenylyltransferase (ATP) required for Ax21 activity	347	Xanthomonas oryzae	4530	Oryza sativa (related: rice)	Monocots	increased virulence (hypervirulence)	23642	4
B2SI02	PHI:1139	raxQ	Adenylylsulfate kinase protein required for Ax21 (synonym: AvrXa21) activity	347	Xanthomonas oryzae	4530	Oryza sativa (related: rice)	Monocots	increased virulence (hypervirulence)	48410	16
I1RNY7	PHI:1181	(Sc Kic1)	protein kinase	5518	Fusarium graminearum	4564	Triticum (related: wheat)	Monocots	reduced virulence	350	6
O42621	PHI:121	PTH3	Imidazole glycerol phosphate dehydrogenase	318829	Magnaporthe oryzae	4530	Oryza sativa (related: rice)	Monocots	loss of pathogenicity	120	1
I1RRQ8	PHI:1211	(Sc Ctk1)	protein kinase	5518	Fusarium graminearum	4564	Triticum (related: wheat)	Monocots	reduced virulence	124	3
I1RWQ0	PHI:1240;PHI:3088	FGSG_08729;CPK2	encode the catalytic subunits of cyclic AMP (cAMP)-dependent protein kinase A (PKA);protein kinase	5518	Fusarium graminearum	4565;4577	Triticum aestivum (related: bread wheat);Zea mays (related: maize)	Monocots	unaffected pathogenicity;loss of pathogenicity	312	3
I1RB79	PHI:1249	FGSG_00786	protein kinase	5518	Fusarium graminearum	4564	Triticum (related: wheat)	Monocots	unaffected pathogenicity	40	1
I1RQS8	PHI:1379	GzC2H042	transcription factor	5518	Fusarium graminearum	4564	Triticum (related: wheat)	Monocots	reduced virulence	28	1
I1RXZ0	PHI:1467	GzCCAAT007	transcription factor	5518	Fusarium graminearum	4564	Triticum (related: wheat)	Monocots	unaffected pathogenicity	40	1
V6RRH2	PHI:1594	GzOB034	transcription factor	5518	Fusarium graminearum	4564	Triticum (related: wheat)	Monocots	unaffected pathogenicity	30632	10
I1RE55	PHI:1616	GzssDB001	transcription factor	5518	Fusarium graminearum	4564	Triticum (related: wheat)	Monocots	unaffected pathogenicity	208	3
V6QWX8	PHI:1626	GzTF2S001	transcription factor	5518	Fusarium graminearum	4564	Triticum (related: wheat)	Monocots	unaffected pathogenicity	90	1
I1RWP1	PHI:1648;PHI:6246	Famyo2;GzWing020	Myosin proteins;transcription factor	5518	Fusarium graminearum	4565	Triticum aestivum (related: bread wheat)	Monocots	reduced virulence	418	10
I1S4C9	PHI:1660	GzCCCH004	transcription factor	5518	Fusarium graminearum	4564	Triticum (related: wheat)	Monocots	unaffected pathogenicity	16626	4
Q9HFW4	PHI:187	RUM1	Transcription regulator	5270	Ustilago maydis	4577	Zea mays (related: maize)	Monocots	loss of pathogenicity	22	1
Q9HEP9	PHI:203	BCG1	G alpha protein subunit	40559	Botrytis cinerea	3885;4081	Phaseolus vulgaris (related: kidney bean);Solanum lycopersicum (related: tomato)	Eudicots	reduced virulence	20	1
G4MZY1	PHI:2034	MFP1	beta-oxidation	318829	Magnaporthe oryzae	4530	Oryza sativa (related: rice)	Monocots	reduced virulence	5152	13
G4MNA5	PHI:2096	Calcium-transporting ATPase 3	Ca2+ pump	318829	Magnaporthe oryzae	4513;4564	Hordeum vulgare (related: barley);Triticum (related: wheat)	Monocots	loss of pathogenicity	234	5
G4NGP6	PHI:2097	Neo1	Ca2+ pump	318829	Magnaporthe oryzae	4513;4564	Hordeum vulgare (related: barley);Triticum (related: wheat)	Monocots	loss of pathogenicity	242	2
G4MWY5	PHI:2113	Kin4	Ca2+/CAM-dependent serine/threonine protein kinases	318829	Magnaporthe oryzae	4513;4564	Hordeum vulgare (related: barley);Triticum (related: wheat)	Monocots	reduced virulence;loss of pathogenicity	84	2
G4N178	PHI:2153;PHI:2356	MoHYR1;MoHyr1	Plant virulence;-	318829	Magnaporthe oryzae	4513	Hordeum vulgare (related: barley)	Monocots	reduced virulence	4662	5
Q9C1C6	PHI:216	HDC1	Histone deacetylase	5017	Bipolaris zeicola	4577	Zea mays (related: maize)	Monocots	reduced virulence	226	2
P52496	PHI:219	LIG4	DNA ligase	5476	Candida albicans	10090	Mus musculus (related: house mouse)	Rodents	reduced virulence	2724	2
P49606	PHI:22	UAC1	Adenylate cyclase	5270	Ustilago maydis	4577	Zea mays (related: maize)	Monocots	loss of pathogenicity	332	4
O93802	PHI:2312;PHI:2844	THR;BRM2	Dihydroxynaphthalene Melanin Biosynthesis;1,3,8-trihydroxynaphthalene reductase	5599	Alternaria alternata	23211	Pyrus communis (related: pear)	Eudicots	unaffected pathogenicity;increased virulence (hypervirulence)	6002	8
I1RC32	PHI:2351;PHI:2353	AMT1	Arginine Methyltransferase	5518	Fusarium graminearum	4577;4564	Zea mays (related: maize);Triticum (related: wheat)	Monocots	reduced virulence	82	1
Q00903	PHI:24	Avenacinase	Avenacinase	29850	Gaeumannomyces graminis	4564;4498	Triticum (related: wheat);Avena sativa (related: oat)	Monocots	unaffected pathogenicity;loss of pathogenicity	39788	10
F9X6J7	PHI:1044	MgTpk2	Protein kinase A subunit c	1047171	Zymoseptoria tritici	4564	Triticum (related: wheat)	Monocots	reduced virulence	2	1
Q1HGK2	PHI:1058	MoSNF1	MoSNF1 protein	318829	Magnaporthe oryzae	4530	Oryza sativa (related: rice)	Monocots	reduced virulence	86	2
O13289	PHI:106;PHI:7209	CAT1;cat1	Catalase	5476	Candida albicans	10090;7137	Mus musculus (related: house mouse);Galleria mellonella (related: greater wax moth)	Rodents;Moths	unaffected pathogenicity;reduced virulence	574	5
C6K2F1	PHI:1074;PHI:2125	MGSTE50p;STE50	-;MAP kinase scaffolding protein	1047171	Zymoseptoria tritici	4564	Triticum (related: wheat)	Monocots	reduced virulence	30	1
I1RT48	PHI:1216	FGSG_07344	protein kinase	5518	Fusarium graminearum	4564	Triticum (related: wheat)	Monocots	reduced virulence	2974	2
I1RJM9	PHI:1221	FGSG_04054	protein kinase	5518	Fusarium graminearum	4564	Triticum (related: wheat)	Monocots	lethal	54	1
I1RN31	PHI:1223	FGSG_05393	protein kinase	5518	Fusarium graminearum	4564	Triticum (related: wheat)	Monocots	lethal	1788	6
I1RZ37	PHI:1237	FGSG_09660	protein kinase	5518	Fusarium graminearum	4564	Triticum (related: wheat)	Monocots	lethal	82	3
I1RFC7	PHI:1239	FGSG_02399	protein kinase	5518	Fusarium graminearum	4564	Triticum (related: wheat)	Monocots	unaffected pathogenicity	86	3
I1RUC7	PHI:1260	FGSG_07816	protein kinase	5518	Fusarium graminearum	4564	Triticum (related: wheat)	Monocots	unaffected pathogenicity	12092	6
O42695	PHI:140	CaSLN1	Histidine Kinase	5476	Candida albicans	10090	Mus musculus (related: house mouse)	Rodents	reduced virulence	380	2
P32964	PHI:143	CHT	Cyanide hydratase	5563	Gloeocercospora sorghi	4558	Sorghum bicolor (related: sorghum)	Monocots	unaffected pathogenicity	930	1
I1S8E5	PHI:1433	GzC2H102	transcription factor	5518	Fusarium graminearum	4564	Triticum (related: wheat)	Monocots	unaffected pathogenicity	556	11
Q4IB96	PHI:1546	GzMyb010	transcription factor	5518	Fusarium graminearum	4564	Triticum (related: wheat)	Monocots	lethal	18	1
I1RAX7	PHI:1563	GzOB003	transcription factor	5518	Fusarium graminearum	4564	Triticum (related: wheat)	Monocots	unaffected pathogenicity	42	1
I1RE46	PHI:1570	GzOB010	transcription factor	5518	Fusarium graminearum	4564	Triticum (related: wheat)	Monocots	unaffected pathogenicity	196	3
I1RFX8	PHI:1574	GzOB014	transcription factor	5518	Fusarium graminearum	4564	Triticum (related: wheat)	Monocots	lethal	162	2
I1RSI4	PHI:1587	GzOB027	transcription factor	5518	Fusarium graminearum	4564	Triticum (related: wheat)	Monocots	unaffected pathogenicity	122	3
I1RDG9	PHI:1628	FgFSR1	transcription factor	5518	Fusarium graminearum	4564	Triticum (related: wheat)	Monocots	reduced virulence	4	1
Q9Y880	PHI:188	SNF1	Protein Kinase	5017	Bipolaris zeicola	4577	Zea mays (related: maize)	Monocots	reduced virulence	50	1
Q99324	PHI:191	TOM1	Tomatinase	39703	Septoria lycopersici	4081	Solanum lycopersicum (related: tomato)	Eudicots	unaffected pathogenicity	47056	25
G4N054	PHI:2018;PHI:2106	MoPLC2;MGG_05332.5	Phospholipase C;-	318829	Magnaporthe oryzae	4513;4564	Hordeum vulgare (related: barley);Triticum (related: wheat)	Monocots	reduced virulence;loss of pathogenicity	82	1
Q9C1S8	PHI:206	CaNAG1	GlcN6P deaminase	5476	Candida albicans	10090	Mus musculus (related: house mouse)	Rodents	reduced virulence	4500	6
G4N6Q1	PHI:2074	Moatg6	-	318829	Magnaporthe oryzae	4530	Oryza sativa (related: rice)	Monocots	loss of pathogenicity	86	2
G4MXG4	PHI:2095	Calcium-transporting ATPase 3	Ca2+ pump	318829	Magnaporthe oryzae	4513;4564	Hordeum vulgare (related: barley);Triticum (related: wheat)	Monocots	reduced virulence	138	1
C5MK57	PHI:1072;PHI:2124	MGSTE7p;STE7	MAP kinase kinase;-	1047171	Zymoseptoria tritici	4564	Triticum (related: wheat)	Monocots	loss of pathogenicity	458	2
G4MXG4	PHI:2095	Calcium-transporting ATPase 3	Ca2+ pump	318829	Magnaporthe oryzae	4513;4564	Hordeum vulgare (related: barley);Triticum (related: wheat)	Monocots	reduced virulence	138	3
Q9UWF0	PHI:2108	CAM	-	318829	Magnaporthe oryzae	4513;4564	Hordeum vulgare (related: barley);Triticum (related: wheat)	Monocots	reduced virulence;loss of pathogenicity	428	14
G4MNE6	PHI:2109	CNB	-	318829	Magnaporthe oryzae	4513;4564	Hordeum vulgare (related: barley);Triticum (related: wheat)	Monocots	reduced virulence;loss of pathogenicity	58	1
G4MTZ0	PHI:2114	Calnexin	-	318829	Magnaporthe oryzae	4513;4564	Hordeum vulgare (related: barley);Triticum (related: wheat)	Monocots	loss of pathogenicity	2	1
A4ZGP3	PHI:1161	MgMfs1	major facilitator superfamily transporter	1047171	Zymoseptoria tritici	4564	Triticum (related: wheat)	Monocots	unaffected pathogenicity;chemistry target: sensitivity to chemical	5940	5
G4N2B2	PHI:2128	MoHox1	-	318829	Magnaporthe oryzae	4530	Oryza sativa (related: rice)	Monocots	reduced virulence	56	1
I1RY25	PHI:1167	NPC1	sterol trafficking	5518	Fusarium graminearum	4566	Triticum aestivum x triticum timopheevi (related: common wheat x sanduri wheat)	Monocots	reduced virulence	38	1
Q9C1C6	PHI:216	HDC1	Histone deacetylase	5017	Bipolaris zeicola	4577	Zea mays (related: maize)	Monocots	reduced virulence	226	1
I1RHM4	PHI:1213	FGSG_05586	protein kinase	5518	Fusarium graminearum	4564	Triticum (related: wheat)	Monocots	reduced virulence	150	1
D4III8	PHI:2227	pao	polyamine oxidase	5270	Ustilago maydis	4577	Zea mays (related: maize)	Monocots	reduced virulence;loss of pathogenicity	50	1
I1RT48	PHI:1216	FGSG_07344	protein kinase	5518	Fusarium graminearum	4564	Triticum (related: wheat)	Monocots	reduced virulence	2974	1
Q32WF7	PHI:2269	Mdh1	Mannitol 2-dehydrogenase	13684	Parastagonospora nodorum	4564	Triticum (related: wheat)	Monocots	unaffected pathogenicity	6368	15
I1RAY2	PHI:1218	FGSG_00677	protein kinase	5518	Fusarium graminearum	4564	Triticum (related: wheat)	Monocots	lethal	134	4
I1S1U7	PHI:2352;PHI:2354	AMT2	Arginine Methyltransferase	5518	Fusarium graminearum	4577;4564	Zea mays (related: maize);Triticum (related: wheat)	Monocots	unaffected pathogenicity;reduced virulence	1368	5
I1RMV6	PHI:1222	FGSG_05306	protein kinase	5518	Fusarium graminearum	4564	Triticum (related: wheat)	Monocots	lethal	78	1
Q6QIY0	PHI:2382	Upa2	Protein phosphatase	5270	Ustilago maydis	4577	Zea mays (related: maize)	Monocots	unaffected pathogenicity	244	3
I1RTC2	PHI:1232	FGSG_07423	protein kinase	5518	Fusarium graminearum	4564	Triticum (related: wheat)	Monocots	lethal	58	1
I1RS33	PHI:1250	FGSG_06940	protein kinase	5518	Fusarium graminearum	4564	Triticum (related: wheat)	Monocots	unaffected pathogenicity	110	2
Q5AHA0	PHI:136	CaHK1 (CHK1)	Histidine Kinase	5476	Candida albicans	10114;10090	Rattus (related: rat);Mus musculus (related: house mouse)	Rodents	unaffected pathogenicity;reduced virulence;loss of pathogenicity	164	2
Q4IQX3	PHI:1470	GzHMG002	transcription factor	5518	Fusarium graminearum	4564	Triticum (related: wheat)	Monocots	reduced virulence	22	1
I1RCE1	PHI:1568	GzOB008	transcription factor	5518	Fusarium graminearum	4564	Triticum (related: wheat)	Monocots	unaffected pathogenicity	19670	2
I1RFJ2	PHI:1573	GzOB013	transcription factor	5518	Fusarium graminearum	4564	Triticum (related: wheat)	Monocots	lethal	210	7
I1RZ39	PHI:1599	GzOB039	transcription factor	5518	Fusarium graminearum	4564	Triticum (related: wheat)	Monocots	unaffected pathogenicity	19160	1
I1S1V9	PHI:1604	GzOB045	transcription factor	5518	Fusarium graminearum	4564	Triticum (related: wheat)	Monocots	unaffected pathogenicity	298	9
Q4IR08	PHI:1608	GzP53L001	transcription factor	5518	Fusarium graminearum	4564	Triticum (related: wheat)	Monocots	unaffected pathogenicity	20	1
I1RN27	PHI:1638	GzWing010	transcription factor	5518	Fusarium graminearum	4564	Triticum (related: wheat)	Monocots	unaffected pathogenicity	18	1
I1RS37	PHI:1643	GzWing015	transcription factor	5518	Fusarium graminearum	4564	Triticum (related: wheat)	Monocots	reduced virulence	290	5
I1RF25	PHI:1657	GzCCCH001	transcription factor	5518	Fusarium graminearum	4564	Triticum (related: wheat)	Monocots	unaffected pathogenicity	76	1
I1RF25	PHI:1657	GzCCCH001	transcription factor	5518	Fusarium graminearum	4564	Triticum (related: wheat)	Monocots	unaffected pathogenicity	76	1
I1S245	PHI:1659	GzCCCH003	transcription factor	5518	Fusarium graminearum	4564	Triticum (related: wheat)	Monocots	unaffected pathogenicity	72	3
Q4I2M7	PHI:1676	GzDHHC004	transcription factor	5518	Fusarium graminearum	4564	Triticum (related: wheat)	Monocots	unaffected pathogenicity	84	2
G4NI28	PHI:2100;PHI:9482	Spf1;Spf1 (MGG_12005)	Ca2+ pump;P5-type ATPase	318829	Magnaporthe oryzae	4513;4530	Hordeum vulgare (related: barley);Oryza sativa (related: rice)	Monocots	reduced virulence;loss of pathogenicity	82	2
G4MXJ4	PHI:2145;PHI:9180	MoSSADH (MGG_01230);MoSSADH	Succinate-semialdehyde dehydrogenase	318829	Magnaporthe oryzae	4530	Oryza sativa (related: rice)	Monocots	unaffected pathogenicity;loss of pathogenicity	18800	20
B5TM01	PHI:2158	MoCMK1	Calcium/calmodulin-dependent kinase	318829	Magnaporthe oryzae	4530	Oryza sativa (related: rice)	Monocots	reduced virulence	124	3
G4N7T3	PHI:2162;PHI:7725	CPKA;cpkA	Catalytic subunit of cyclic AMP-protein kinase A;-	318829	Magnaporthe oryzae	4513;4530	Hordeum vulgare (related: barley);Oryza sativa (related: rice)	Monocots	unaffected pathogenicity;reduced virulence	30	1
Q9HFU4	PHI:220	MAN1	Phosphomannose isomerase	5207	Cryptococcus neoformans	9986;10090	Oryctolagus cuniculus (related: rabbit);Mus musculus (related: house mouse)	Rabbits & hares;Rodents	reduced virulence	16860	8
O14439	PHI:2228	odc	polyamine oxidase	5270	Ustilago maydis	4577	Zea mays (related: maize)	Monocots	loss of pathogenicity	98	3
Q0U6E8	PHI:2249;PHI:2270	Mpd1	-;Mannitol-1-phosphate 5-dehydrogenase	13684	Parastagonospora nodorum	4564	Triticum (related: wheat)	Monocots	unaffected pathogenicity	30780	20
Q6Q487	PHI:2306	clxA	Lectin chaperone	746128	Aspergillus fumigatus	10090	Mus musculus (related: house mouse)	Rodents	unaffected pathogenicity	84	1
D2E9W7	PHI:2376	DEP2	Histone Deacetylase Inhibitor	29001	Alternaria brassicicola	3702;3712	Arabidopsis thaliana (related: thale cress);Brassica oleracea (no common name found)	Eudicots	unaffected pathogenicity;reduced virulence	54	1
Q01446	PHI:112	MAK1	Maackiain detoxification	140110	Nectria haematococca	3827	Cicer arietinum (related: chickpea)	Eudicots	reduced virulence	20	1
I1RW16	PHI:1178;PHI:4941	(Sc Cdc28);cdc2A	Cell cycle progression;protein kinase	5518	Fusarium graminearum	4565	Triticum aestivum (related: bread wheat)	Monocots	lethal;reduced virulence;loss of pathogenicity	94	2
Q4HYC1	PHI:1201	(Bud32)	protein kinase	5518	Fusarium graminearum	4564	Triticum (related: wheat)	Monocots	reduced virulence	102	1
I1RS48	PHI:1202	(Sc Cla4)	protein kinase	5518	Fusarium graminearum	4564	Triticum (related: wheat)	Monocots	reduced virulence	36	3
O42621	PHI:121	PTH3	Imidazole glycerol phosphate dehydrogenase	318829	Magnaporthe oryzae	4530	Oryza sativa (related: rice)	Monocots	loss of pathogenicity	120	2
I1RYF8	PHI:1236	FGSG_09408	protein kinase	5518	Fusarium graminearum	4564	Triticum (related: wheat)	Monocots	lethal	22	2
I1RS33	PHI:1250	FGSG_06940	protein kinase	5518	Fusarium graminearum	4564	Triticum (related: wheat)	Monocots	unaffected pathogenicity	110	1
I1RSF7	PHI:1385	GzC2H048	transcription factor	5518	Fusarium graminearum	4564	Triticum (related: wheat)	Monocots	unaffected pathogenicity	74236	74
I1RWF1	PHI:1403	GzC2H066	transcription factor	5518	Fusarium graminearum	4564	Triticum (related: wheat)	Monocots	reduced virulence	1230	17
O42793	PHI:146	CT-PKAC	PKA catalytic subunit	5466	Colletotrichum trifolii	3879	Medicago sativa (related: alfalfa)	Eudicots	loss of pathogenicity	20	2
Q4HTT1	PHI:1468	GzCCAAT008	transcription factor	5518	Fusarium graminearum	4564	Triticum (related: wheat)	Monocots	unaffected pathogenicity	826	5
I1RST1	PHI:1491	GzHMG023	transcription factor	5518	Fusarium graminearum	4564	Triticum (related: wheat)	Monocots	lethal	20	1
Q9UQY5	PHI:151;PHI:406;PHI:2230	UBC3;kpp2;KPP2	-;MAP kinase	5270	Ustilago maydis	4577	Zea mays (related: maize)	Monocots	reduced virulence;loss of pathogenicity	170	5
I1RXA5	PHI:1522	GzHOMEL026	transcription factor	5518	Fusarium graminearum	4564	Triticum (related: wheat)	Monocots	lethal	4358	4
I1S0N5	PHI:1552	GzMyb016	transcription factor	5518	Fusarium graminearum	4564	Triticum (related: wheat)	Monocots	unaffected pathogenicity	48006	91
V6RLW4	PHI:1583	GzOB023	transcription factor	5518	Fusarium graminearum	4564	Triticum (related: wheat)	Monocots	unaffected pathogenicity	174	3
Q4HYQ4	PHI:1601	GzOB042	transcription factor	5518	Fusarium graminearum	4564	Triticum (related: wheat)	Monocots	unaffected pathogenicity	8	1
I1RW28	PHI:1646	GzWing018	transcription factor	5518	Fusarium graminearum	4564	Triticum (related: wheat)	Monocots	reduced virulence	8	1
Q4I2M7	PHI:1676	GzDHHC004	transcription factor	5518	Fusarium graminearum	4564	Triticum (related: wheat)	Monocots	unaffected pathogenicity	84	1
I1S5Z3	PHI:1685	GzRad003	transcription factor	5518	Fusarium graminearum	4564	Triticum (related: wheat)	Monocots	unaffected pathogenicity	12700	12
G4MW66	PHI:2062;PHI:3815	Gph1;GPH1	-;Phosphorylase	318829	Magnaporthe oryzae	4513;4530	Hordeum vulgare (related: barley);Oryza sativa (related: rice)	Monocots	unaffected pathogenicity;reduced virulence;loss of pathogenicity	62558	91
Q9UWF0	PHI:2108	CAM	-	318829	Magnaporthe oryzae	4513;4564	Hordeum vulgare (related: barley);Triticum (related: wheat)	Monocots	reduced virulence;loss of pathogenicity	428	10
P49606	PHI:22	UAC1	Adenylate cyclase	5270	Ustilago maydis	4577	Zea mays (related: maize)	Monocots	loss of pathogenicity	332	4
Q9C1E9	PHI:226	PEX6	Peroxisome biogenesis	5462	Colletotrichum lagenaria	3659	Cucumis sativus (related: cucumber)	Eudicots	loss of pathogenicity	152	2
Q9Y7A7	PHI:238	WdPKS1	Polyketide synthase	5970	Exophiala dermatitidis	10090	Mus musculus (related: house mouse)	Rodents	reduced virulence	68	1
P57051	PHI:2415	tatA	virulence;Translocate folded proteins	666	Vibrio cholerae	10090	Mus musculus (related: house mouse)	Rodents	reduced virulence	12	1
Q29YB0	PHI:2438	MgFus3	Putative MAP kinase	1047171	Zymoseptoria tritici	4564	Triticum (related: wheat)	Monocots	loss of pathogenicity	28	1
Q8J286	PHI:244	CLAP1	Copper transporting ATPase	290576	Colletotrichum lindemuthianum	3885	Phaseolus vulgaris (related: kidney bean)	Eudicots	loss of pathogenicity	524	9
C5A846	PHI:2440	PidR	Response regulator/ two-component regulatory	337	Burkholderia glumae	4530;4679	Oryza sativa (related: rice);Allium cepa (related: onion)	Monocots	reduced virulence	458	2
Q3Y5V5	PHI:1018;PHI:2042	ABC3	MDR Transporter;multidrug resistance;protection from oxidative stress	318829	Magnaporthe oryzae	4513;4530	Hordeum vulgare (related: barley);Oryza sativa (related: rice)	Monocots	loss of pathogenicity	119914	172
I1RCP1	PHI:1080;PHI:9405	CCH1 (FGSG_01364);Cch1	EF-hand domain-containing protein;Putative voltage-gated calcium ion channel	5518	Fusarium graminearum	4565	Triticum aestivum (related: bread wheat)	Monocots	unaffected pathogenicity;reduced virulence	296	2
A4K9H6	PHI:1144	PhoP	Two-component system response regulatory required for Ax21 (synonym: AvrXa21)activity	347	Xanthomonas oryzae	4530	Oryza sativa (related: rice)	Monocots	reduced virulence	492	3
I1RC85	PHI:1204	(Sc Cbk1)	protein kinase	5518	Fusarium graminearum	4564	Triticum (related: wheat)	Monocots	reduced virulence	6	1
I1RCF7	PHI:1220	FGSG_01271	protein kinase	5518	Fusarium graminearum	4564	Triticum (related: wheat)	Monocots	lethal	52	2
I1RP15	PHI:1252	FGSG_05764	protein kinase	5518	Fusarium graminearum	4564	Triticum (related: wheat)	Monocots	unaffected pathogenicity	62	3
I1RKK5	PHI:1289	FGSG_04416	protein kinase	5518	Fusarium graminearum	4564	Triticum (related: wheat)	Monocots	unaffected pathogenicity	102	3
I1RWW2	PHI:1405	GzC2H069	transcription factor	5518	Fusarium graminearum	4564	Triticum (related: wheat)	Monocots	unaffected pathogenicity	30	1
I1RW22	PHI:1439	GzNot001	transcription factor	5518	Fusarium graminearum	4564	Triticum (related: wheat)	Monocots	lethal	2	1
Q4HTT1	PHI:1468	GzCCAAT008	transcription factor	5518	Fusarium graminearum	4564	Triticum (related: wheat)	Monocots	unaffected pathogenicity	826	8
Q9Y8E5	PHI:156	STE12alpha	Transcription factor	5207	Cryptococcus neoformans	9986;10090	Oryctolagus cuniculus (related: rabbit);Mus musculus (related: house mouse)	Rabbits & hares;Rodents	unaffected pathogenicity	10	1
I1RAH4	PHI:1562	GzOB002	transcription factor	5518	Fusarium graminearum	4564	Triticum (related: wheat)	Monocots	lethal	278	3
I1S216	PHI:1605	GzOB046	transcription factor	5518	Fusarium graminearum	4564	Triticum (related: wheat)	Monocots	unaffected pathogenicity	24778	4
I1RRW3	PHI:1658	GzCCCH002	transcription factor	5518	Fusarium graminearum	4564	Triticum (related: wheat)	Monocots	unaffected pathogenicity	168	1
Q4IA62	PHI:1674	GzDHHC002	transcription factor	5518	Fusarium graminearum	4564	Triticum (related: wheat)	Monocots	unaffected pathogenicity	60	2
Q9UVQ4	PHI:182	RAS1	-;Signalling cascade	5207	Cryptococcus neoformans	9986;6239;7137;7227	Oryctolagus cuniculus (related: rabbit);Caenorhabditis elegans (related: roundworm);Galleria mellonella (related: greater wax moth);Drosophila melanogaster (related: fruit fly)	Rabbits & hares;Nematodes;Moths;Flies	reduced virulence;loss of pathogenicity	14	1
Q9Y880	PHI:188	SNF1	Protein Kinase	5017	Bipolaris zeicola	4577	Zea mays (related: maize)	Monocots	reduced virulence	50	1
P34809	PHI:19	NMT	Myristoyl-CoA:protein N-myristoyltransferase	5207	Cryptococcus neoformans	9986	Oryctolagus cuniculus (related: rabbit)	Rabbits & hares	reduced virulence	210	2
G4NCA2	PHI:2016	PTH2	lipid reserve mobilization;Peroxisomal carnitine acetyl transferase	318829	Magnaporthe oryzae	4513;4530	Hordeum vulgare (related: barley);Oryza sativa (related: rice)	Monocots	loss of pathogenicity	84	2
G4N054	PHI:2018;PHI:2106	MoPLC2;MGG_05332.5	Phospholipase C;-	318829	Magnaporthe oryzae	4513;4564	Hordeum vulgare (related: barley);Triticum (related: wheat)	Monocots	reduced virulence;loss of pathogenicity	82	2
G4MZY1	PHI:2034	MFP1	beta-oxidation	318829	Magnaporthe oryzae	4530	Oryza sativa (related: rice)	Monocots	reduced virulence	5152	26
G4MQZ2	PHI:2038	Mir1	-	318829	Magnaporthe oryzae	4513;4530;4679	Hordeum vulgare (related: barley);Oryza sativa (related: rice);Allium cepa (related: onion)	Monocots	unaffected pathogenicity	48	2
G4MNE6	PHI:2109	CNB	-	318829	Magnaporthe oryzae	4513;4564	Hordeum vulgare (related: barley);Triticum (related: wheat)	Monocots	reduced virulence;loss of pathogenicity	58	1
O74271	PHI:212	COS1/CHIK1	Histidine Kinase	5476	Candida albicans	10090	Mus musculus (related: house mouse)	Rodents	reduced virulence	4954	4
G4N4F9	PHI:2166;PHI:6390	CBP1	Chitin deacetylase;-	318829	Magnaporthe oryzae	4530	Oryza sativa (related: rice)	Monocots	unaffected pathogenicity	12	1
G4MRP8	PHI:2190	MoCYP51A	Sterol 14 a-demethylase	318829	Magnaporthe oryzae	4530	Oryza sativa (related: rice)	Monocots	reduced virulence	8	1
Q04802	PHI:221	NAG1	Glucosamine-6-phosphate deaminase	5476	Candida albicans	10090	Mus musculus (related: house mouse)	Rodents	reduced virulence	14956	5
Q4P245	PHI:2239	Spe-Sdh	encodes spermidine synthase/saccharopine dehydrogenase	5270	Ustilago maydis	4577	Zea mays (related: maize)	Monocots	reduced virulence	38	1
Q0UHM8	PHI:2257	Pbl1	Pantothenate- beta -alanine ligase	13684	Parastagonospora nodorum	4564	Triticum (related: wheat)	Monocots	unaffected pathogenicity	31440	7
I1RC32	PHI:2351;PHI:2353	AMT1	Arginine Methyltransferase	5518	Fusarium graminearum	4577;4564	Zea mays (related: maize);Triticum (related: wheat)	Monocots	reduced virulence	82	3
I1S7N4	PHI:2386	ACL1	Adenosine triphosphate (ATP) citrate lyase	5518	Fusarium graminearum	4564	Triticum (related: wheat)	Monocots	loss of pathogenicity	48	2
Q9C443	PHI:241	CAC1	Adenylate cyclase	5207	Cryptococcus neoformans	9986;10090	Oryctolagus cuniculus (related: rabbit);Mus musculus (related: house mouse)	Rabbits & hares;Rodents	loss of pathogenicity	1486	4
O13289	PHI:106;PHI:7209	CAT1;cat1	Catalase	5476	Candida albicans	10090;7137	Mus musculus (related: house mouse);Galleria mellonella (related: greater wax moth)	Rodents;Moths	unaffected pathogenicity;reduced virulence	574	10
C5J0G7	PHI:1075;PHI:2126	STE12;MGSTE12p	Transcription factor;-	1047171	Zymoseptoria tritici	4564	Triticum (related: wheat)	Monocots	reduced virulence	160	2
A9Z1V6	PHI:1083;PHI:2272	CpkB	Calcium/calmodulin-dependent protein kinase;Calcium/calmodulin-dependent kinase	13684	Parastagonospora nodorum	4564	Triticum (related: wheat)	Monocots	unaffected pathogenicity	8	1
P78585	PHI:1026	bcplc1	Phospholipase C	40559	Botrytis cinerea	3885	Phaseolus vulgaris (related: kidney bean)	Eudicots	reduced virulence	86	1
I1RT36	PHI:1200;PHI:4587	Fgk3;(Gsk3)	glycogen synthase kinase;protein kinase	5518	Fusarium graminearum	4565	Triticum aestivum (related: bread wheat)	Monocots	reduced virulence;loss of pathogenicity	26	1
V6RFV4	PHI:1230	FGSG_06959	protein kinase	5518	Fusarium graminearum	4564	Triticum (related: wheat)	Monocots	lethal	76	4
I1RWQ2	PHI:1235	FGSG_08731	protein kinase	5518	Fusarium graminearum	4564	Triticum (related: wheat)	Monocots	lethal	306	8
I1RSK0	PHI:1257	FGSG_07121	protein kinase	5518	Fusarium graminearum	4564	Triticum (related: wheat)	Monocots	unaffected pathogenicity	196	1
A1IVT7	PHI:1031	bcSAK1	Stress activated MAPK	40559	Botrytis cinerea	3885	Phaseolus vulgaris (related: kidney bean)	Eudicots	reduced virulence	72	1
I1RE83	PHI:1288;PHI:6300	FgPDK1;FGSG_01963	Pyruvate dehydrogenase kinase;protein kinase	5518	Fusarium graminearum	4081;4565	Solanum lycopersicum (related: tomato);Triticum aestivum (related: bread wheat)	Eudicots;Monocots	unaffected pathogenicity;reduced virulence	36	1
C6K2F1	PHI:1074;PHI:2125	MGSTE50p;STE50	-;MAP kinase scaffolding protein	1047171	Zymoseptoria tritici	4564	Triticum (related: wheat)	Monocots	reduced virulence	30	1
I1RBT2	PHI:1347	GzC2H007	transcription factor	5518	Fusarium graminearum	4564	Triticum (related: wheat)	Monocots	reduced virulence	930	2
Q8NJX2	PHI:1119	Cdc42	Small GTPase	5270	Ustilago maydis	4577	Zea mays (related: maize)	Monocots	loss of pathogenicity	122	3
I1RXE9	PHI:1408	GzC2H072	transcription factor	5518	Fusarium graminearum	4564	Triticum (related: wheat)	Monocots	unaffected pathogenicity	32	1
B2SRG1	PHI:1141	raxB	ATP-binding transporter protein required for Ax21 activity	347	Xanthomonas oryzae	4530	Oryza sativa (related: rice)	Monocots	increased virulence (hypervirulence)	93688	59
Q4IB96	PHI:1546	GzMyb010	transcription factor	5518	Fusarium graminearum	4564	Triticum (related: wheat)	Monocots	lethal	18	1
I1RNY7	PHI:1181	(Sc Kic1)	protein kinase	5518	Fusarium graminearum	4564	Triticum (related: wheat)	Monocots	reduced virulence	350	9
I1S050	PHI:1203	(Sc Yck1/2/3)	protein kinase	5518	Fusarium graminearum	4564	Triticum (related: wheat)	Monocots	reduced virulence	74	4
I1RE76	PHI:1571	GzOB011	transcription factor	5518	Fusarium graminearum	4564	Triticum (related: wheat)	Monocots	unaffected pathogenicity	18	1
I1RP88	PHI:1226	FGSG_05845	protein kinase	5518	Fusarium graminearum	4564	Triticum (related: wheat)	Monocots	lethal	178	5
I1RFJ2	PHI:1573	GzOB013	transcription factor	5518	Fusarium graminearum	4564	Triticum (related: wheat)	Monocots	lethal	210	1
I1S1V3	PHI:1238	FGSG_10725	protein kinase	5518	Fusarium graminearum	4564	Triticum (related: wheat)	Monocots	lethal	448	1
I1RS24	PHI:1584	GzOB024	transcription factor	5518	Fusarium graminearum	4564	Triticum (related: wheat)	Monocots	unaffected pathogenicity	106	2
O42696	PHI:138	CaNIK1	Histidine Kinase	5476	Candida albicans	10090	Mus musculus (related: house mouse)	Rodents	reduced virulence	3000	3
O74686	PHI:159	URA5	Pyrimidine biosynthesis	5037	Histoplasma capsulatum	10090	Mus musculus (related: house mouse)	Rodents	loss of pathogenicity	10700	6
I1RT91	PHI:1388	GzC2H051	transcription factor	5518	Fusarium graminearum	4564	Triticum (related: wheat)	Monocots	unaffected pathogenicity	52	3
I1RQD8	PHI:1614	GzSART1	transcription factor	5518	Fusarium graminearum	4564	Triticum (related: wheat)	Monocots	unaffected pathogenicity	4	1
I1RAH4	PHI:1562	GzOB002	transcription factor	5518	Fusarium graminearum	4564	Triticum (related: wheat)	Monocots	lethal	278	3
I1RD69	PHI:1620	GzJUM002	transcription factor	5518	Fusarium graminearum	4564	Triticum (related: wheat)	Monocots	unaffected pathogenicity	32	2
I1RCH5	PHI:1569	GzOB009	transcription factor	5518	Fusarium graminearum	4564	Triticum (related: wheat)	Monocots	lethal	29466	27
V6QWX8	PHI:1626	GzTF2S001	transcription factor	5518	Fusarium graminearum	4564	Triticum (related: wheat)	Monocots	unaffected pathogenicity	90	2
I1RE94	PHI:1572	GzOB012	transcription factor	5518	Fusarium graminearum	4564	Triticum (related: wheat)	Monocots	unaffected pathogenicity	5774	2
Q9Y7W4	PHI:172	CRK1	Cdc2-related protein kinase	5476	Candida albicans	10090	Mus musculus (related: house mouse)	Rodents	loss of pathogenicity	4552	7
O59918	PHI:158	UKC1	Protein kinase	5270	Ustilago maydis	4577	Zea mays (related: maize)	Monocots	reduced virulence	108	3
G4MQZ9	PHI:2025	HDL1	intracellular triacylglycerol lipases	318829	Magnaporthe oryzae	4530	Oryza sativa (related: rice)	Monocots	unaffected pathogenicity	44	1
I1RM35	PHI:1580	GzOB020	transcription factor	5518	Fusarium graminearum	4564	Triticum (related: wheat)	Monocots	unaffected pathogenicity	5632	6
G4NBI6	PHI:2033	MgPex6	peroxisome biogenesis	318829	Magnaporthe oryzae	4530	Oryza sativa (related: rice)	Monocots	loss of pathogenicity	66	3
I1RQ81	PHI:1582	GzOB022	transcription factor	5518	Fusarium graminearum	4564	Triticum (related: wheat)	Monocots	unaffected pathogenicity	78	2
G4NAJ0	PHI:2175	NMR3	Corepressor to control virulence-associated gene expression downstream of Tps1	318829	Magnaporthe oryzae	4530	Oryza sativa (related: rice)	Monocots	reduced virulence	240	2
I1RWI5	PHI:1590	GzOB030	transcription factor	5518	Fusarium graminearum	4564	Triticum (related: wheat)	Monocots	lethal	126	1
G4MTF9	PHI:2205	JmjC domain-containing protein 5 [GH10 family]	Endo-beta-1,4 xylanase	318829	Magnaporthe oryzae	4513;4564	Hordeum vulgare (related: barley);Triticum (related: wheat)	Monocots	reduced virulence	4	1
Q4IEV4	PHI:1637	GzWing009	transcription factor	5518	Fusarium graminearum	4564	Triticum (related: wheat)	Monocots	lethal	66	2
Q0UA24	PHI:2256	Xdh1	xylitol dehydrogenase	13684	Parastagonospora nodorum	4564	Triticum (related: wheat)	Monocots	unaffected pathogenicity	72244	45
Q9C0N5	PHI:207	CaNAG2	GlcNAcP deacetylase	5476	Candida albicans	10090	Mus musculus (related: house mouse)	Rodents	reduced virulence	3488	5
B1GVX7	PHI:2290	BcBOA6	Polyketide synthases	40559	Botrytis cinerea	3885	Phaseolus vulgaris (related: kidney bean)	Eudicots	reduced virulence	30	1
G4N471	PHI:2098	Calcium-transporting ATPase 3	Ca2+ pump	318829	Magnaporthe oryzae	4513;4564	Hordeum vulgare (related: barley);Triticum (related: wheat)	Monocots	loss of pathogenicity	392	6
E9F082	PHI:2323	mhk1	Group III histidine kinase	568076	Metarhizium robertsii	7067	Tenebrio molitor (related: yellow mealworm)	Beetles	reduced virulence	1624	4
G4NCW8	PHI:2101	MGG_11454.5	Ca2+ exchanger	318829	Magnaporthe oryzae	4513;4564	Hordeum vulgare (related: barley);Triticum (related: wheat)	Monocots	unaffected pathogenicity	154	2
Q5TIP4	PHI:2347	PGIP2	Polygalacturonases	40559	Botrytis cinerea	3702;4097	Arabidopsis thaliana (related: thale cress);Nicotiana tabacum (related: common tobacco)	Eudicots	effector (plant avirulence determinant)	30	1
O74271	PHI:212	COS1/CHIK1	Histidine Kinase	5476	Candida albicans	10090	Mus musculus (related: house mouse)	Rodents	reduced virulence	4954	2
G4NCR0	PHI:2407	MoRIM15	Response regulator homolog gene	318829	Magnaporthe oryzae	4530	Oryza sativa (related: rice)	Monocots	reduced virulence	4	1
Q0U2A0	PHI:2255	Abd1	arabitol dehydrogenase	13684	Parastagonospora nodorum	4564	Triticum (related: wheat)	Monocots	unaffected pathogenicity	24134	3
Q0UHM8	PHI:2257	Pbl1	Pantothenate- beta -alanine ligase	13684	Parastagonospora nodorum	4564	Triticum (related: wheat)	Monocots	unaffected pathogenicity	31440	23
C5A845	PHI:2439	PidS	Sensor histidine kinase / two-component regulatory system (TCRS)	337	Burkholderia glumae	4530;4679	Oryza sativa (related: rice);Allium cepa (related: onion)	Monocots	reduced virulence	2750	3
B0JFC8	PHI:2304	BCFHG1	NO detoxication	40559	Botrytis cinerea	3885;4081;3702	Phaseolus vulgaris (related: kidney bean);Solanum lycopersicum (related: tomato);Arabidopsis thaliana (related: thale cress)	Eudicots	unaffected pathogenicity	22216	8
B0JFC8	PHI:2304	BCFHG1	NO detoxication	40559	Botrytis cinerea	3885;4081;3702	Phaseolus vulgaris (related: kidney bean);Solanum lycopersicum (related: tomato);Arabidopsis thaliana (related: thale cress)	Eudicots	unaffected pathogenicity	22216	8
Q4WR83	PHI:2321	SidI	Acyl-CoA ligase	746128	Aspergillus fumigatus	10090	Mus musculus (related: house mouse)	Rodents	reduced virulence	48248	19
I1RJS9	PHI:2326;PHI:2491;PHI:5720	PTC1;ScOrtholog_PTC1;FgPTC1	Uncharacterized protein;Type 2C protein phosphatase	5518	Fusarium graminearum	4565	Triticum aestivum (related: bread wheat)	Monocots	unaffected pathogenicity;reduced virulence	20	1
Q96WM3	PHI:235	VPH1	Vesicular proton pump	5207	Cryptococcus neoformans	10090	Mus musculus (related: house mouse)	Rodents	reduced virulence	506	9
Q0H744	PHI:2361	cna1	-	5180	Sclerotinia sclerotiorum	3702;4081	Arabidopsis thaliana (related: thale cress);Solanum lycopersicum (related: tomato)	Eudicots	reduced virulence	30	2
B2SI03	PHI:1138	raxP (cysD)	Sulfate adenylyltransferase (ATP) required for Ax21 activity	347	Xanthomonas oryzae	4530	Oryza sativa (related: rice)	Monocots	increased virulence (hypervirulence)	23642	1
I1RKC4	PHI:1169;PHI:1172	HDF2	ClassII Histone Deacetylase	5518	Fusarium graminearum	4564	Triticum (related: wheat)	Monocots	reduced virulence	244	1
Q4IB89	PHI:1224	FGSG_05519	protein kinase	5518	Fusarium graminearum	4564	Triticum (related: wheat)	Monocots	lethal	100	2
I1RPV7	PHI:1227	FGSG_06089	protein kinase	5518	Fusarium graminearum	4564	Triticum (related: wheat)	Monocots	lethal	30	1
I1RWQ0	PHI:1240;PHI:3088	FGSG_08729;CPK2	encode the catalytic subunits of cyclic AMP (cAMP)-dependent protein kinase A (PKA);protein kinase	5518	Fusarium graminearum	4565;4577	Triticum aestivum (related: bread wheat);Zea mays (related: maize)	Monocots	unaffected pathogenicity;loss of pathogenicity	312	1
I1RAE2	PHI:1241	FGSG_00469	protein kinase	5518	Fusarium graminearum	4564	Triticum (related: wheat)	Monocots	unaffected pathogenicity	28	1
I1RME6	PHI:1274	FGSG_05135	protein kinase	5518	Fusarium graminearum	4564	Triticum (related: wheat)	Monocots	unaffected pathogenicity	28	1
I1RG87	PHI:1358	GzC2H018	transcription factor	5518	Fusarium graminearum	4564	Triticum (related: wheat)	Monocots	unaffected pathogenicity	100	1
I1RG87	PHI:1358	GzC2H018	transcription factor	5518	Fusarium graminearum	4564	Triticum (related: wheat)	Monocots	unaffected pathogenicity	100	1
O42696	PHI:138	CaNIK1	Histidine Kinase	5476	Candida albicans	10090	Mus musculus (related: house mouse)	Rodents	reduced virulence	3000	2
O42695	PHI:140	CaSLN1	Histidine Kinase	5476	Candida albicans	10090	Mus musculus (related: house mouse)	Rodents	reduced virulence	380	1
I1RZL0	PHI:1414	GzC2H081	transcription factor	5518	Fusarium graminearum	4564	Triticum (related: wheat)	Monocots	unaffected pathogenicity	76	2
I1S3J7	PHI:1424	GzC2H092	transcription factor	5518	Fusarium graminearum	4564	Triticum (related: wheat)	Monocots	unaffected pathogenicity	2880	1
I1S3J7	PHI:1424	GzC2H092	transcription factor	5518	Fusarium graminearum	4564	Triticum (related: wheat)	Monocots	unaffected pathogenicity	2880	1
I1RZG7	PHI:1551	GzMyb015	transcription factor	5518	Fusarium graminearum	4564	Triticum (related: wheat)	Monocots	unaffected pathogenicity	12	2
I1RC95	PHI:1566	GzOB006	transcription factor	5518	Fusarium graminearum	4564	Triticum (related: wheat)	Monocots	lethal	55062	19
I1RKY2	PHI:1578	GzOB018	transcription factor	5518	Fusarium graminearum	4564	Triticum (related: wheat)	Monocots	unaffected pathogenicity	140	2
I1RM35	PHI:1580	GzOB020	transcription factor	5518	Fusarium graminearum	4564	Triticum (related: wheat)	Monocots	unaffected pathogenicity	5632	12
V6RRH2	PHI:1594	GzOB034	transcription factor	5518	Fusarium graminearum	4564	Triticum (related: wheat)	Monocots	unaffected pathogenicity	30632	38
I1S0A1	PHI:1603	GzOB044	transcription factor	5518	Fusarium graminearum	4564	Triticum (related: wheat)	Monocots	unaffected pathogenicity	46	1
I1RD69	PHI:1620	GzJUM002	transcription factor	5518	Fusarium graminearum	4564	Triticum (related: wheat)	Monocots	unaffected pathogenicity	32	1
V6RAN7	PHI:1639	GzWing011	transcription factor	5518	Fusarium graminearum	4564	Triticum (related: wheat)	Monocots	unaffected pathogenicity	32	2
Q9Y7W4	PHI:172	CRK1	Cdc2-related protein kinase	5476	Candida albicans	10090	Mus musculus (related: house mouse)	Rodents	loss of pathogenicity	4552	2
I1RM02	PHI:1955	GzZC270	transcription factor	5518	Fusarium graminearum	4564	Triticum (related: wheat)	Monocots	unaffected pathogenicity	42	1
Q9HFT8	PHI:204	CaCDC35	Adenylate cyclase	5476	Candida albicans	10090	Mus musculus (related: house mouse)	Rodents	loss of pathogenicity	1638	6
Q4P9P1	PHI:2237	Rbf1	zinc-finger transcription factor	5270	Ustilago maydis	4577	Zea mays (related: maize)	Monocots	loss of pathogenicity	2092	25
Q4P245	PHI:2239	Spe-Sdh	encodes spermidine synthase/saccharopine dehydrogenase	5270	Ustilago maydis	4577	Zea mays (related: maize)	Monocots	reduced virulence	38	2
Q0UDE7	PHI:2247	Sch1	Short-Chain Dehydrogenase	13684	Parastagonospora nodorum	4564	Triticum (related: wheat)	Monocots	unaffected pathogenicity	3450	5
C0H5W3	PHI:2370	bcpka1	cAMP pathway catalytic subunit	40559	Botrytis cinerea	3885;4097;4072	Phaseolus vulgaris (related: kidney bean);Nicotiana tabacum (related: common tobacco);Capsicum annuum (no common name found)	Eudicots	reduced virulence	26	1
I1S7N4	PHI:2386	ACL1	Adenosine triphosphate (ATP) citrate lyase	5518	Fusarium graminearum	4564	Triticum (related: wheat)	Monocots	loss of pathogenicity	48	1
Q9C443	PHI:241	CAC1	Adenylate cyclase	5207	Cryptococcus neoformans	9986;10090	Oryctolagus cuniculus (related: rabbit);Mus musculus (related: house mouse)	Rabbits & hares;Rodents	loss of pathogenicity	1486	4
C5A845	PHI:2439	PidS	Sensor histidine kinase / two-component regulatory system (TCRS)	337	Burkholderia glumae	4530;4679	Oryza sativa (related: rice);Allium cepa (related: onion)	Monocots	reduced virulence	2750	5
A0ST44	PHI:1047	CTB6	oxidoreductase	29003	Cercospora nicotianae	4097	Nicotiana tabacum (related: common tobacco)	Eudicots	reduced virulence	864	4
I1RCP1	PHI:1080;PHI:9405	CCH1 (FGSG_01364);Cch1	EF-hand domain-containing protein;Putative voltage-gated calcium ion channel	5518	Fusarium graminearum	4565	Triticum aestivum (related: bread wheat)	Monocots	unaffected pathogenicity;reduced virulence	296	1
I1RZC6	PHI:1088	FGSG_09759	Putative cation efflux family	5518	Fusarium graminearum	4564	Triticum (related: wheat)	Monocots	unaffected pathogenicity	5196	2
I1RY42	PHI:1207;PHI:3178	(Sc Kin1/Kin2);FgKin1	kinases;protein kinase	5518	Fusarium graminearum	4565	Triticum aestivum (related: bread wheat)	Monocots	reduced virulence	76	1
I1S077	PHI:1210	FGSG_10095	protein kinase	5518	Fusarium graminearum	4564	Triticum (related: wheat)	Monocots	reduced virulence	244	3
I1RR00	PHI:1228	FGSG_06502	protein kinase	5518	Fusarium graminearum	4564	Triticum (related: wheat)	Monocots	lethal	64	1
Q4I5U9	PHI:1231;PHI:1492	FGSG_07409;GzHMG024	transcription factor;protein kinase	5518	Fusarium graminearum	4564	Triticum (related: wheat)	Monocots	lethal;unaffected pathogenicity	56	2
I1RCM1	PHI:1353	GzC2H013	transcription factor	5518	Fusarium graminearum	4564	Triticum (related: wheat)	Monocots	reduced virulence	18	1
P32964	PHI:143	CHT	Cyanide hydratase	5563	Gloeocercospora sorghi	4558	Sorghum bicolor (related: sorghum)	Monocots	unaffected pathogenicity	930	2
O59928	PHI:144	CHT42	Chitinase	29875	Trichoderma virens	456999	Rhizoctonia solani (no common name found)	Basidiomycetes	reduced virulence	720	2
O59928	PHI:144	CHT42	Chitinase	29875	Trichoderma virens	456999	Rhizoctonia solani (no common name found)	Basidiomycetes	reduced virulence	720	5
Q4I7F9	PHI:1458	GzAra006	transcription factor	5518	Fusarium graminearum	4564	Triticum (related: wheat)	Monocots	unaffected pathogenicity	4774	6
I1S828	PHI:1503	GzHMG035	transcription factor	5518	Fusarium graminearum	4564	Triticum (related: wheat)	Monocots	unaffected pathogenicity	32	1
I1S0J3	PHI:1526	GzHOMEL036	transcription factor	5518	Fusarium graminearum	4564	Triticum (related: wheat)	Monocots	unaffected pathogenicity	724	7
I1RC64	PHI:1554	GzMyb018	transcription factor	5518	Fusarium graminearum	4564	Triticum (related: wheat)	Monocots	unaffected pathogenicity	4	1
I1RBF6	PHI:1565	GzOB005	transcription factor	5518	Fusarium graminearum	4564	Triticum (related: wheat)	Monocots	unaffected pathogenicity	74	1
I1RFX8	PHI:1574	GzOB014	transcription factor	5518	Fusarium graminearum	4564	Triticum (related: wheat)	Monocots	lethal	162	3
I1S216	PHI:1605	GzOB046	transcription factor	5518	Fusarium graminearum	4564	Triticum (related: wheat)	Monocots	unaffected pathogenicity	24778	25
I1RTB9	PHI:1644	GzRFX1	transcription factor	5518	Fusarium graminearum	4564	Triticum (related: wheat)	Monocots	unaffected pathogenicity	38	1
I1S5Z3	PHI:1685	GzRad003	transcription factor	5518	Fusarium graminearum	4564	Triticum (related: wheat)	Monocots	unaffected pathogenicity	12700	19
P34809	PHI:19	NMT	Myristoyl-CoA:protein N-myristoyltransferase	5207	Cryptococcus neoformans	9986	Oryctolagus cuniculus (related: rabbit)	Rabbits & hares	reduced virulence	210	3
Q92210	PHI:196	ADE2	Phosphoribosylaminoimidazole carboxylase	5476	Candida albicans	10090	Mus musculus (related: house mouse)	Rodents	reduced virulence	30010	14
Q9C0N5	PHI:207	CaNAG2	GlcNAcP deacetylase	5476	Candida albicans	10090	Mus musculus (related: house mouse)	Rodents	reduced virulence	3488	1
Q52CS0	PHI:2075	Moatg7	-	318829	Magnaporthe oryzae	4530	Oryza sativa (related: rice)	Monocots	loss of pathogenicity	2	1
G4MWY5	PHI:2113	Kin4	Ca2+/CAM-dependent serine/threonine protein kinases	318829	Magnaporthe oryzae	4513;4564	Hordeum vulgare (related: barley);Triticum (related: wheat)	Monocots	reduced virulence;loss of pathogenicity	84	1
G4MXJ4	PHI:2145;PHI:9180	MoSSADH (MGG_01230);MoSSADH	Succinate-semialdehyde dehydrogenase	318829	Magnaporthe oryzae	4530	Oryza sativa (related: rice)	Monocots	unaffected pathogenicity;loss of pathogenicity	18800	9
Q9C1E9	PHI:226	PEX6	Peroxisome biogenesis	5462	Colletotrichum lagenaria	3659	Cucumis sativus (related: cucumber)	Eudicots	loss of pathogenicity	152	3
D2IV71	PHI:2303	AaFUS3	-	5599	Alternaria alternata	229630	Citrus x tangelo (related: tangelo)	Eudicots	loss of pathogenicity	42	1
Q96WM3	PHI:235	VPH1	Vesicular proton pump	5207	Cryptococcus neoformans	10090	Mus musculus (related: house mouse)	Rodents	reduced virulence	506	4
I1S1X8	PHI:2355	AMT4	Arginine Methyltransferase	5518	Fusarium graminearum	4577;4564	Zea mays (related: maize);Triticum (related: wheat)	Monocots	reduced virulence	18	2
Q9P880	PHI:240;PHI:2368	BAC;bac	Adenylate cyclase	40559	Botrytis cinerea	3885;4097;4072	Phaseolus vulgaris (related: kidney bean);Nicotiana tabacum (related: common tobacco);Capsicum annuum (no common name found)	Eudicots	reduced virulence	60	3
A7F946	PHI:2411	Ss-ggt1	Gamma-Glutamyl Transpeptidase	5180	Sclerotinia sclerotiorum	4081	Solanum lycopersicum (related: tomato)	Eudicots	reduced virulence	18	1
Q8J286	PHI:244	CLAP1	Copper transporting ATPase	290576	Colletotrichum lindemuthianum	3885	Phaseolus vulgaris (related: kidney bean)	Eudicots	loss of pathogenicity	524	4
I1RRQ8	PHI:1211	(Sc Ctk1)	protein kinase	5518	Fusarium graminearum	4564	Triticum (related: wheat)	Monocots	reduced virulence	124	2
I1RN31	PHI:1223	FGSG_05393	protein kinase	5518	Fusarium graminearum	4564	Triticum (related: wheat)	Monocots	lethal	1788	4
I1RV69	PHI:1234	FGSG_08133	protein kinase	5518	Fusarium graminearum	4564	Triticum (related: wheat)	Monocots	lethal	152	5
I1RA20	PHI:1244	FGSG_00337	protein kinase	5518	Fusarium graminearum	4564	Triticum (related: wheat)	Monocots	unaffected pathogenicity	112	2
I1RCM9	PHI:1354	GzC2H014	transcription factor	5518	Fusarium graminearum	4564	Triticum (related: wheat)	Monocots	reduced virulence	6	1
I1RRG4	PHI:1380	GzC2H043	transcription factor	5518	Fusarium graminearum	4564	Triticum (related: wheat)	Monocots	unaffected pathogenicity	212	1
I1RUL1	PHI:1394	GzC2H057	transcription factor	5518	Fusarium graminearum	4564	Triticum (related: wheat)	Monocots	lethal	12	1
P0C017	PHI:14	ADE2	Phosphoribosylaminoimidazole carboxylase	5207	Cryptococcus neoformans	9986;6239	Oryctolagus cuniculus (related: rabbit);Caenorhabditis elegans (related: roundworm)	Rabbits & hares;Nematodes	reduced virulence;loss of pathogenicity	16822	20
I1RZ85	PHI:1412	GzC2H079	transcription factor	5518	Fusarium graminearum	4564	Triticum (related: wheat)	Monocots	unaffected pathogenicity	70	1
I1S172	PHI:1420	GzC2H088	transcription factor	5518	Fusarium graminearum	4564	Triticum (related: wheat)	Monocots	unaffected pathogenicity	40	1
I1RSI4	PHI:1587	GzOB027	transcription factor	5518	Fusarium graminearum	4564	Triticum (related: wheat)	Monocots	unaffected pathogenicity	122	1
I1S4C9	PHI:1660	GzCCCH004	transcription factor	5518	Fusarium graminearum	4564	Triticum (related: wheat)	Monocots	unaffected pathogenicity	16626	1
I1RMC1	PHI:1678	GzGRF	transcription factor	5518	Fusarium graminearum	4564	Triticum (related: wheat)	Monocots	unaffected pathogenicity	364	3
I1S053	PHI:1772	GzZC087	transcription factor	5518	Fusarium graminearum	4564	Triticum (related: wheat)	Monocots	reduced virulence	40820	44
Q92210	PHI:196	ADE2	Phosphoribosylaminoimidazole carboxylase	5476	Candida albicans	10090	Mus musculus (related: house mouse)	Rodents	reduced virulence	30010	21
Q9UW03	PHI:202;PHI:1160;PHI:2309	BcatrB	ATP-binding cassette (ABC) transporter;ABC transporter	40559	Botrytis cinerea	3702	Arabidopsis thaliana (related: thale cress)	Eudicots	unaffected pathogenicity;chemistry target: sensitivity to chemical;reduced virulence	1078	3
Q9HFT8	PHI:204	CaCDC35	Adenylate cyclase	5476	Candida albicans	10090	Mus musculus (related: house mouse)	Rodents	loss of pathogenicity	1638	5
G4NGP6	PHI:2097	Neo1	Ca2+ pump	318829	Magnaporthe oryzae	4513;4564	Hordeum vulgare (related: barley);Triticum (related: wheat)	Monocots	loss of pathogenicity	242	3
Q9P8W9	PHI:213	CPA1	Cyclophillin	5207	Cryptococcus neoformans	9986;10090	Oryctolagus cuniculus (related: rabbit);Mus musculus (related: house mouse)	Rabbits & hares;Rodents	reduced virulence	4	1
G5EHQ9	PHI:2174	NMR2	Corepressor to control virulence-associated gene expression downstream of Tps1	318829	Magnaporthe oryzae	4530	Oryza sativa (related: rice)	Monocots	reduced virulence	20	1
Q32WF7	PHI:2269	Mdh1	Mannitol 2-dehydrogenase	13684	Parastagonospora nodorum	4564	Triticum (related: wheat)	Monocots	unaffected pathogenicity	6368	3
Q9HFW0	PHI:227	PKA1	-;Cyclic AMP dependent protein kinase	5207	Cryptococcus neoformans	9986;10090;6239;7227;7137	Oryctolagus cuniculus (related: rabbit);Mus musculus (related: house mouse);Caenorhabditis elegans (related: roundworm);Drosophila melanogaster (related: fruit fly);Galleria mellonella (related: greater wax moth)	Rabbits & hares;Rodents;Nematodes;Flies;Moths	reduced virulence;loss of pathogenicity	72	1
Q9L8R8	PHI:2340;PHI:9528	aiiA	N-acyl homoserine lactonase;-	644	Aeromonas hydrophila	217509;90988	Carassius carassius (related: crucian carp);Pimephales promelas (related: fathead minnow)	Bony fishes	unaffected pathogenicity;reduced virulence	38	1
B2Z3E2	PHI:2413	Cgg1	Encodes a Ga sub-unit that regulates sexual and asexual development and secondary metabolism	31870	Colletotrichum graminicola	4577	Zea mays (related: maize)	Monocots	reduced virulence	10	1
Q9KVQ3	PHI:2417	tatC	virulence;Translocate folded proteins	666	Vibrio cholerae	10090	Mus musculus (related: house mouse)	Rodents	reduced virulence	1088	4
I1RXX1	PHI:1006	HMR1	HMG-CoA Reductase	5518	Fusarium graminearum	4564	Triticum (related: wheat)	Monocots	reduced virulence	614	2
A1IVT7	PHI:1031	bcSAK1	Stress activated MAPK	40559	Botrytis cinerea	3885	Phaseolus vulgaris (related: kidney bean)	Eudicots	reduced virulence	72	1
C5MK57	PHI:1072;PHI:2124	MGSTE7p;STE7	MAP kinase kinase;-	1047171	Zymoseptoria tritici	4564	Triticum (related: wheat)	Monocots	loss of pathogenicity	458	1
B9DR51	PHI:1133	Lmepi	UDP-4-Galactose epimerase	5022	Leptosphaeria maculans	3708	Brassica napus (related: rape)	Eudicots	loss of pathogenicity	3640	1
B2SI02	PHI:1139	raxQ	Adenylylsulfate kinase protein required for Ax21 (synonym: AvrXa21) activity	347	Xanthomonas oryzae	4530	Oryza sativa (related: rice)	Monocots	increased virulence (hypervirulence)	48410	17
A4K9H7	PHI:1145	PhoQ	Two-component system sensor kinase required for Ax21 (synonym: AvrXa21) activity	347	Xanthomonas oryzae	4530	Oryza sativa (related: rice)	Monocots	increased virulence (hypervirulence)	10	1
I1RKC4	PHI:1169;PHI:1172	HDF2	ClassII Histone Deacetylase	5518	Fusarium graminearum	4564	Triticum (related: wheat)	Monocots	reduced virulence	244	2
O42620	PHI:120;PHI:594	PTH2;CrAT1 (PTH2)	carnitine-dependent acetyl unit transport from peroxisomes;Carnitine acetyl transferase	318829	Magnaporthe oryzae	4513	Hordeum vulgare (related: barley)	Monocots	loss of pathogenicity	154	2
I1RAA6	PHI:1256	FGSG_00433	protein kinase	5518	Fusarium graminearum	4564	Triticum (related: wheat)	Monocots	unaffected pathogenicity	54	1
I1RNH0	PHI:1265	FGSG_05549	protein kinase	5518	Fusarium graminearum	4564	Triticum (related: wheat)	Monocots	unaffected pathogenicity	10	1
I1RKK5	PHI:1289	FGSG_04416	protein kinase	5518	Fusarium graminearum	4564	Triticum (related: wheat)	Monocots	unaffected pathogenicity	102	2
I1RQE9	PHI:1317	GzBrom002	transcription factor	5518	Fusarium graminearum	4564	Triticum (related: wheat)	Monocots	reduced virulence	20	1
I1RLS1	PHI:1369	GzC2H031	transcription factor	5518	Fusarium graminearum	4564	Triticum (related: wheat)	Monocots	unaffected pathogenicity	34	1
I1RX64	PHI:1407	GzC2H071	transcription factor	5518	Fusarium graminearum	4564	Triticum (related: wheat)	Monocots	lethal	6746	8
I1S0J3	PHI:1526	GzHOMEL036	transcription factor	5518	Fusarium graminearum	4564	Triticum (related: wheat)	Monocots	unaffected pathogenicity	724	4
I1S0N5	PHI:1552	GzMyb016	transcription factor	5518	Fusarium graminearum	4564	Triticum (related: wheat)	Monocots	unaffected pathogenicity	48006	49
I1RM25	PHI:1579	GzOB019	transcription factor	5518	Fusarium graminearum	4564	Triticum (related: wheat)	Monocots	unaffected pathogenicity	44838	34
I1RZ39	PHI:1599	GzOB039	transcription factor	5518	Fusarium graminearum	4564	Triticum (related: wheat)	Monocots	unaffected pathogenicity	19160	21
I1REN7	PHI:1681	GzNF001	transcription factor	5518	Fusarium graminearum	4564	Triticum (related: wheat)	Monocots	unaffected pathogenicity	2272	13
Q9UVG2	PHI:177	ODC	Ornithine decarboxylase	13684	Parastagonospora nodorum	4564	Triticum (related: wheat)	Monocots	reduced virulence	172	1
Q00LS5	PHI:1082;PHI:2271	CpkA	Calcium/calmodulin-dependent protein kinase;Calcium/calmodulin-dependent kinase	13684	Parastagonospora nodorum	4564	Triticum (related: wheat)	Monocots	unaffected pathogenicity;reduced virulence	44	3
O13465	PHI:194	URE1	Urease	5207	Cryptococcus neoformans	10090	Mus musculus (related: house mouse)	Rodents	reduced virulence	48	1
I1RW16	PHI:1178;PHI:4941	(Sc Cdc28);cdc2A	Cell cycle progression;protein kinase	5518	Fusarium graminearum	4565	Triticum aestivum (related: bread wheat)	Monocots	lethal;reduced virulence;loss of pathogenicity	94	2
G4MQZ2	PHI:2038	Mir1	-	318829	Magnaporthe oryzae	4513;4530;4679	Hordeum vulgare (related: barley);Oryza sativa (related: rice);Allium cepa (related: onion)	Monocots	unaffected pathogenicity	48	1
Q524W4	PHI:2084	Moatg18	-	318829	Magnaporthe oryzae	4530	Oryza sativa (related: rice)	Monocots	reduced virulence	70	1
I1RA81	PHI:1198	(Sc Ssk2/Ssk22)	protein kinase	5518	Fusarium graminearum	4564	Triticum (related: wheat)	Monocots	reduced virulence	108	3
Q524W4	PHI:2084	Moatg18	-	318829	Magnaporthe oryzae	4530	Oryza sativa (related: rice)	Monocots	reduced virulence	70	1
O14439	PHI:2228	odc	polyamine oxidase	5270	Ustilago maydis	4577	Zea mays (related: maize)	Monocots	loss of pathogenicity	98	1
I1RA81	PHI:1198	(Sc Ssk2/Ssk22)	protein kinase	5518	Fusarium graminearum	4564	Triticum (related: wheat)	Monocots	reduced virulence	108	1
Q0UDE7	PHI:2247	Sch1	Short-Chain Dehydrogenase	13684	Parastagonospora nodorum	4564	Triticum (related: wheat)	Monocots	unaffected pathogenicity	3450	1
B0XTA5	PHI:2293	cycA	Mitochondrial respiration	746128	Aspergillus fumigatus	10090	Mus musculus (related: house mouse)	Rodents	reduced virulence	134	2
I1RSW5	PHI:1199;PHI:3087	CPK1;(Sc Tpk2)	encode the catalytic subunits of cyclic AMP (cAMP)-dependent protein kinase A (PKA);protein kinase	5518	Fusarium graminearum	4565;4577	Triticum aestivum (related: bread wheat);Zea mays (related: maize)	Monocots	reduced virulence;loss of pathogenicity	126	1
O93802	PHI:2312;PHI:2844	THR;BRM2	Dihydroxynaphthalene Melanin Biosynthesis;1,3,8-trihydroxynaphthalene reductase	5599	Alternaria alternata	23211	Pyrus communis (related: pear)	Eudicots	unaffected pathogenicity;increased virulence (hypervirulence)	6002	13
I2G6S4	PHI:2338	UhCna1	Cell-wall Integrity	120017	Ustilago hordei	4513	Hordeum vulgare (related: barley)	Monocots	reduced virulence	34	2
V6RFV4	PHI:1230	FGSG_06959	protein kinase	5518	Fusarium graminearum	4564	Triticum (related: wheat)	Monocots	lethal	76	1
Q9L8R8	PHI:2340;PHI:9528	aiiA	N-acyl homoserine lactonase;-	644	Aeromonas hydrophila	217509;90988	Carassius carassius (related: crucian carp);Pimephales promelas (related: fathead minnow)	Bony fishes	unaffected pathogenicity;reduced virulence	38	1
I1RPR1	PHI:2387	ACL2	Adenosine triphosphate (ATP) citrate lyase	5518	Fusarium graminearum	4564	Triticum (related: wheat)	Monocots	loss of pathogenicity	74	3
I1RUC7	PHI:1260	FGSG_07816	protein kinase	5518	Fusarium graminearum	4564	Triticum (related: wheat)	Monocots	unaffected pathogenicity	12092	7
A7F946	PHI:2411	Ss-ggt1	Gamma-Glutamyl Transpeptidase	5180	Sclerotinia sclerotiorum	4081	Solanum lycopersicum (related: tomato)	Eudicots	reduced virulence	18	1
F9XJV5	PHI:2441	MgAlg2	Alpha-1,2-mannosyltransferase	1047171	Zymoseptoria tritici	4564	Triticum (related: wheat)	Monocots	loss of pathogenicity	68	3
I1RK97	PHI:1368	GzC2H029	transcription factor	5518	Fusarium graminearum	4564	Triticum (related: wheat)	Monocots	unaffected pathogenicity	26	1
Q4I7F9	PHI:1458	GzAra006	transcription factor	5518	Fusarium graminearum	4564	Triticum (related: wheat)	Monocots	unaffected pathogenicity	4774	6
I1RWP1	PHI:1648;PHI:6246	Famyo2;GzWing020	Myosin proteins;transcription factor	5518	Fusarium graminearum	4565	Triticum aestivum (related: bread wheat)	Monocots	reduced virulence	418	6
Q4HWE2	PHI:1671	GzCCHC011	transcription factor	5518	Fusarium graminearum	4564	Triticum (related: wheat)	Monocots	reduced virulence	106	1
I1REN7	PHI:1681	GzNF001	transcription factor	5518	Fusarium graminearum	4564	Triticum (related: wheat)	Monocots	unaffected pathogenicity	2272	1
I1S1M0	PHI:1829	GzZC144	transcription factor	5518	Fusarium graminearum	4564	Triticum (related: wheat)	Monocots	lethal	22	1
O13465	PHI:194	URE1	Urease	5207	Cryptococcus neoformans	10090	Mus musculus (related: house mouse)	Rodents	reduced virulence	48	1
G4NGA7	PHI:2032	VTL1	intracellular triacylglycerol lipases	318829	Magnaporthe oryzae	4530	Oryza sativa (related: rice)	Monocots	unaffected pathogenicity	408	1
G4NC11	PHI:2052	Cdc42	actin cytoskeleton organization and cell polarity;establishment of turgor in appressoria	318829	Magnaporthe oryzae	4530	Oryza sativa (related: rice)	Monocots	reduced virulence	54	2
A7U5U4	PHI:2058	LHS1	Endoplasmic Reticulum Chaperone	318829	Magnaporthe oryzae	4530	Oryza sativa (related: rice)	Monocots	reduced virulence	7936	20
D0ERY8	PHI:2201;PHI:7328	MopdeL;PdeL	Cyclic AMP phosphodiesterase;Regulation of surface hydrophobicity;Regulation of intracellular cAMP levels;Regulation of extracellular laccase and peroxidase activities;Maintenance of cell wall integrity	318829	Magnaporthe oryzae	4530	Oryza sativa (related: rice)	Monocots	unaffected pathogenicity;reduced virulence;loss of pathogenicity	84	1
Q0UA24	PHI:2256	Xdh1	xylitol dehydrogenase	13684	Parastagonospora nodorum	4564	Triticum (related: wheat)	Monocots	unaffected pathogenicity	72244	14
B0XTA5	PHI:2293	cycA	Mitochondrial respiration	746128	Aspergillus fumigatus	10090	Mus musculus (related: house mouse)	Rodents	reduced virulence	134	4
G4N7Y2	PHI:2406	MoSKN7	Response regulator	318829	Magnaporthe oryzae	4530	Oryza sativa (related: rice)	Monocots	unaffected pathogenicity	32	1
P87248	PHI:109	CLK1	Protein kinase (Ser/thr)	290576	Colletotrichum lindemuthianum	3885	Phaseolus vulgaris (related: kidney bean)	Eudicots	reduced virulence	480	1
B2SNI2	PHI:1142	raxC	Outer membrane protein required for Ax21 (synonym: AvrXa21) activity	347	Xanthomonas oryzae	4530	Oryza sativa (related: rice)	Monocots	increased virulence (hypervirulence)	5848	3
I1RZP6	PHI:1197;PHI:3862	FgSNF1;(Snf1)	protein kinase;sucrose non-fermenting 1 protein kinase complex genes	5518	Fusarium graminearum	4565	Triticum aestivum (related: bread wheat)	Monocots	reduced virulence	40	4
I1RAE5	PHI:1208;PHI:3131	FgSCH9;(Sc Sch9)	kinase;protein kinase	5518	Fusarium graminearum	4565;4577	Triticum aestivum (related: bread wheat);Zea mays (related: maize)	Monocots	reduced virulence	10	1
I1S4P4	PHI:1217	FGSG_00792	protein kinase	5518	Fusarium graminearum	4564	Triticum (related: wheat)	Monocots	reduced virulence	94	2
I1RZ37	PHI:1237	FGSG_09660	protein kinase	5518	Fusarium graminearum	4564	Triticum (related: wheat)	Monocots	lethal	82	1
I1RAE2	PHI:1241	FGSG_00469	protein kinase	5518	Fusarium graminearum	4564	Triticum (related: wheat)	Monocots	unaffected pathogenicity	28	1
I1RYN5	PHI:1272	FGSG_09492	protein kinase	5518	Fusarium graminearum	4564	Triticum (related: wheat)	Monocots	unaffected pathogenicity	8	1
I1RBT2	PHI:1347	GzC2H007	transcription factor	5518	Fusarium graminearum	4564	Triticum (related: wheat)	Monocots	reduced virulence	930	16
I1RN37	PHI:1374	GzC2H037	transcription factor	5518	Fusarium graminearum	4564	Triticum (related: wheat)	Monocots	unaffected pathogenicity	20	1
I1RQ34	PHI:1377	GzC2H040	transcription factor	5518	Fusarium graminearum	4564	Triticum (related: wheat)	Monocots	unaffected pathogenicity	4	1
P0C017	PHI:14	ADE2	Phosphoribosylaminoimidazole carboxylase	5207	Cryptococcus neoformans	9986;6239	Oryctolagus cuniculus (related: rabbit);Caenorhabditis elegans (related: roundworm)	Rabbits & hares;Nematodes	reduced virulence;loss of pathogenicity	16822	16
I1RYE2	PHI:1459	GzAra007	transcription factor	5518	Fusarium graminearum	4564	Triticum (related: wheat)	Monocots	unaffected pathogenicity	18402	1
I1RYE2	PHI:1459	GzAra007	transcription factor	5518	Fusarium graminearum	4564	Triticum (related: wheat)	Monocots	unaffected pathogenicity	18402	7
I1S2F2	PHI:1500	GzHMG032	transcription factor	5518	Fusarium graminearum	4564	Triticum (related: wheat)	Monocots	unaffected pathogenicity	376	7
I1RXA5	PHI:1522	GzHOMEL026	transcription factor	5518	Fusarium graminearum	4564	Triticum (related: wheat)	Monocots	lethal	4358	1
I1RDG6	PHI:1555	GzMyb019	transcription factor	5518	Fusarium graminearum	4564	Triticum (related: wheat)	Monocots	unaffected pathogenicity	46	1
I1RWI5	PHI:1590	GzOB030	transcription factor	5518	Fusarium graminearum	4564	Triticum (related: wheat)	Monocots	lethal	126	8
I1RE55	PHI:1616	GzssDB001	transcription factor	5518	Fusarium graminearum	4564	Triticum (related: wheat)	Monocots	unaffected pathogenicity	208	3
I1RAH2	PHI:1629	GzWing001	transcription factor	5518	Fusarium graminearum	4564	Triticum (related: wheat)	Monocots	unaffected pathogenicity	112	1
G4MS03	PHI:2006;PHI:2008	HST1	Histone Deacetylation	318829	Magnaporthe oryzae	4513	Hordeum vulgare (related: barley)	Monocots	unaffected pathogenicity	966	2
G4N471	PHI:2098	Calcium-transporting ATPase 3	Ca2+ pump	318829	Magnaporthe oryzae	4513;4564	Hordeum vulgare (related: barley);Triticum (related: wheat)	Monocots	loss of pathogenicity	392	2
C4YFX2	PHI:211;PHI:6806	tup1;CaTUP1	Transcription factor;Transcriptional repressor	5476	Candida albicans	9606	Homo sapiens (related: human)	Primates	reduced virulence	210	2
G4N8D9	PHI:2131	MoHox7	-	318829	Magnaporthe oryzae	4530	Oryza sativa (related: rice)	Monocots	loss of pathogenicity	58	1
B5TM01	PHI:2158	MoCMK1	Calcium/calmodulin-dependent kinase	318829	Magnaporthe oryzae	4530	Oryza sativa (related: rice)	Monocots	reduced virulence	124	1
G4MV04	PHI:2200;PHI:3163	Mosln1;MoSLN1	Histidine Kinase;Contributes to osmo-adaptation;Oxidative signaling;Regulation of extracellular laccase and peroxidase activities;Maintenance of cell wall integrity	318829	Magnaporthe oryzae	4530	Oryza sativa (related: rice)	Monocots	reduced virulence;loss of pathogenicity	56	1
G4N983	PHI:2215	BIM1	Regulation of cell cycle	318829	Magnaporthe oryzae	4530	Oryza sativa (related: rice)	Monocots	reduced virulence	36	1
Q0U6E8	PHI:2249;PHI:2270	Mpd1	-;Mannitol-1-phosphate 5-dehydrogenase	13684	Parastagonospora nodorum	4564	Triticum (related: wheat)	Monocots	unaffected pathogenicity	30780	10
Q0U2A0	PHI:2255	Abd1	arabitol dehydrogenase	13684	Parastagonospora nodorum	4564	Triticum (related: wheat)	Monocots	unaffected pathogenicity	24134	14
I1RJD6	PHI:2408	FgMT1	Sphingolipid C-9 Methyltransferases	5518	Fusarium graminearum	3702;4081;4577;4564	Arabidopsis thaliana (related: thale cress);Solanum lycopersicum (related: tomato);Zea mays (related: maize);Triticum (related: wheat)	Eudicots;Monocots	unaffected pathogenicity	1412	1
C5A846	PHI:2440	PidR	Response regulator/ two-component regulatory	337	Burkholderia glumae	4530;4679	Oryza sativa (related: rice);Allium cepa (related: onion)	Monocots	reduced virulence	458	5
Q4WCL5	PHI:2529	ERG10	Acetyl-CoA acetyl-transferase	746128	Aspergillus fumigatus	Lethal pathogen phenotype	Lethal pathogen phenotype	Lethal pathogen phenotype	lethal	48006	51
Q4WKG5	PHI:2530	TUB1	Tubulin alpha-1 chain	746128	Aspergillus fumigatus	Lethal pathogen phenotype;10090	Lethal pathogen phenotype;Mus musculus (related: house mouse)	Lethal pathogen phenotype;Rodents	lethal;loss of pathogenicity	2370	30
Q9FD00	PHI:2473	hrpx	Regulatory gene;part of the HrpX/HrpY Two-Component System	66269	Pantoea stewartii	4577	Zea mays (related: maize)	Monocots	reduced virulence	42456	7
F7IY49	PHI:2443	PilA	Bacterial biolm formation, surface motility and virulence	317	Pseudomonas syringae	4097	Nicotiana tabacum (related: common tobacco)	Eudicots	reduced virulence	122	1
Q4X0M4	PHI:2527	SEC31	Initiation of germ tubes	746128	Aspergillus fumigatus	Lethal pathogen phenotype;10090	Lethal pathogen phenotype;Mus musculus (related: house mouse)	Lethal pathogen phenotype;Rodents	lethal;loss of pathogenicity	14	1
D4ICB6	PHI:2459	nlpI	Tetratricopeptide lipoprotein	552	Erwinia amylovora	23211	Pyrus communis (related: pear)	Eudicots	reduced virulence	24696	1
D4I7B7	PHI:2500	rcsC	Phosphorelay system	552	Erwinia amylovora	23211	Pyrus communis (related: pear)	Eudicots	loss of pathogenicity	102	1
Q5H3K9	PHI:2445	ColR	-	347	Xanthomonas oryzae	4530	Oryza sativa (related: rice)	Monocots	reduced virulence	196	1
Q46631	PHI:2471	Ams	Exopolysaccharides Amylovoran	552	Erwinia amylovora	3750;23211	Malus domestica (related: apple);Pyrus communis (related: pear)	Eudicots	loss of pathogenicity	40534	21
Q7WTQ9	PHI:2469	AcrB	Multidrug efflux pump	552	Erwinia amylovora	3750	Malus domestica (related: apple)	Eudicots	reduced virulence	3358	2
D4ICB6	PHI:2459	nlpI	Tetratricopeptide lipoprotein	552	Erwinia amylovora	23211	Pyrus communis (related: pear)	Eudicots	reduced virulence	24696	5
F7IY49	PHI:2443	PilA	Bacterial biolm formation, surface motility and virulence	317	Pseudomonas syringae	4097	Nicotiana tabacum (related: common tobacco)	Eudicots	reduced virulence	122	2
Q5H3K9	PHI:2445	ColR	-	347	Xanthomonas oryzae	4530	Oryza sativa (related: rice)	Monocots	reduced virulence	196	2
Q58PW9	PHI:2465	HsvB	hrp-associated systemic virulence	552	Erwinia amylovora	3750;23211	Malus domestica (related: apple);Pyrus communis (related: pear)	Eudicots	unaffected pathogenicity;reduced virulence	828	1
Q46631	PHI:2471	Ams	Exopolysaccharides Amylovoran	552	Erwinia amylovora	3750;23211	Malus domestica (related: apple);Pyrus communis (related: pear)	Eudicots	loss of pathogenicity	40534	8
Q4WX65	PHI:2540	IPP1	Inorganic pyrophosphatase	746128	Aspergillus fumigatus	Lethal pathogen phenotype	Lethal pathogen phenotype	Lethal pathogen phenotype	lethal	122	3
A0A0H2XHH2	PHI:2634	argF	Ornithine carbamoyltransferase	1280	Staphylococcus aureus	10090	Mus musculus (related: house mouse)	Rodents	unaffected pathogenicity	29342	9
P0A2G1	PHI:2681	smpB	Regulators of systemic infection	28901	Salmonella enterica	10090	Mus musculus (related: house mouse)	Rodents	reduced virulence	3030	5
P69917	PHI:2682	csrA	Regulators of systemic infection	28901	Salmonella enterica	10090	Mus musculus (related: house mouse)	Rodents	reduced virulence	486	1
P0A2T6	PHI:2684	crp	Regulators of systemic infection	28901	Salmonella enterica	10090	Mus musculus (related: house mouse)	Rodents	reduced virulence	5044	7
Q97PH9	PHI:2736	IDTR	Putative iron-dependent transcriptional regulator	1313	Streptococcus pneumoniae	10090	Mus musculus (related: house mouse)	Rodents	reduced virulence	5148	12
Q6WP53	PHI:277	BCP1	Cyclophillin	40559	Botrytis cinerea	3885;4081	Phaseolus vulgaris (related: kidney bean);Solanum lycopersicum (related: tomato)	Eudicots	reduced virulence	10	1
Q9P4U9	PHI:2832	AKT3-1	AK-Toxin Biosynthesis	5599	Alternaria alternata	23211	Pyrus communis (related: pear)	Eudicots	loss of pathogenicity	68	1
C3JXE9	PHI:2836	RED3	Putative short chain dehydrogenase	5016	Bipolaris maydis	4577	Zea mays (related: maize)	Monocots	reduced virulence	2854	2
Q87BR6	PHI:2936	XhpT	Response regulator involved in surface attachment, cell-cell aggregation, exopolysaccharide production and virulence	2371	Xylella fastidiosa	29760	Vitis vinifera (related: wine grape)	Eudicots	reduced virulence	14180	1
L8AYM6	PHI:2950	cyaA	Adenylate cyclase gene responsible for cAMP synthesis	317	Pseudomonas syringae	3702;4097	Arabidopsis thaliana (related: thale cress);Nicotiana tabacum (related: common tobacco)	Eudicots	reduced virulence	6446	5
Q4WNW5	PHI:2970	argB	Ornithine transcarbamoyl transferase	746128	Aspergillus fumigatus	7137	Galleria mellonella (related: greater wax moth)	Moths	unaffected pathogenicity	22	1
Q82Z33	PHI:2997	EF3245	Cell-envelope associated acid phosphatase	1351	Enterococcus faecalis	7137	Galleria mellonella (related: greater wax moth)	Moths	unaffected pathogenicity	26906	25
A6QHK8	PHI:3004	ClpX	Part of proteolytic complex	1280	Staphylococcus aureus	10090	Mus musculus (related: house mouse)	Rodents	reduced virulence	72240	76
P58662	PHI:3011	rcsC11	Sensor protein	28901	Salmonella enterica	10090	Mus musculus (related: house mouse)	Rodents	unaffected pathogenicity;reduced virulence;increased virulence (hypervirulence)	112868	25
Q9KTE2	PHI:3059	YbeY	essential endoribonuclease	666	Vibrio cholerae	10090	Mus musculus (related: house mouse)	Rodents	loss of pathogenicity	334	3
I1RCC9	PHI:3089;PHI:4174	fac1;Fgac1	adenylate cyclase;Adenyly l Cyclase	5518	Fusarium graminearum	4565;4577	Triticum aestivum (related: bread wheat);Zea mays (related: maize)	Monocots	unaffected pathogenicity;reduced virulence	2082	3
I1RCC9	PHI:3089;PHI:4174	fac1;Fgac1	adenylate cyclase;Adenyly l Cyclase	5518	Fusarium graminearum	4565;4577	Triticum aestivum (related: bread wheat);Zea mays (related: maize)	Monocots	unaffected pathogenicity;reduced virulence	2082	3
V9W6M6	PHI:3090	pamA	encodes paenilamicin, a secondary metabolite antibiotic	1464	Paenibacillus larvae	7460	Apis mellifera (related: honey bee)	Bees	reduced virulence	15286	1
Q8P8Q1	PHI:3112	galU	Uridine triphosphate (UTP)-glucose-1-phosphate uridylyltransferase	339	Xanthomonas campestris	3712	Brassica oleracea (no common name found)	Eudicots	loss of pathogenicity	31634	11
N0A4X7	PHI:3114	FrxA	NADH-flavin oxidoreductase	210	Helicobacter pylori	10090	Mus musculus (related: house mouse)	Rodents	reduced virulence	11030	24
D4I307	PHI:3126;PHI:9305	argD	Acetylornithine/succinyldiaminopimelate aminotransferase;argDgene encodes a predicted N-acetylornithine aminotransferase enzyme	552	Erwinia amylovora	3750;4097	Malus domestica (related: apple);Nicotiana tabacum (related: common tobacco)	Eudicots	unaffected pathogenicity;reduced virulence;loss of pathogenicity	80132	52
Q66A26	PHI:3134	pykF	Part of the pyruvate - tricarboxylic acid cycle node	633	Yersinia pseudotuberculosis	10090	Mus musculus (related: house mouse)	Rodents	reduced virulence	46806	67
B8F4X8	PHI:3147	rfaE	Part of cluster invloved in lipooligosaccharide synthesis	738	Glaesserella parasuis	9823	Sus scrofa (related: pig)	Even-toed ungulates	reduced virulence	18624	11
W0H866	PHI:3165	hopA1	Effector (plant avirulence determinant)	36746	Pseudomonas cichorii	4081;3712;4073;3659;3847;4111;3656	Solanum lycopersicum (related: tomato);Brassica oleracea (no common name found);Capsicum frutescens (related: hot pepper);Cucumis sativus (related: cucumber);Glycine max (related: soybean);Solanum melongena (related: eggplant);Cucumis melo (related: muskmelon)	Eudicots	unaffected pathogenicity;effector (plant avirulence determinant)	130060	39
Q5GZN6	PHI:3220;PHI:4649;PHI:8310	fliC (XOO2581);fliC	Flagellar motility;Non motile flagella	347	Xanthomonas oryzae	4530	Oryza sativa (related: rice)	Monocots	unaffected pathogenicity;reduced virulence	1636	1
Q9KL18	PHI:3233	VCA0931	c-di-GMPphosphodiesterases	666	Vibrio cholerae	10090	Mus musculus (related: house mouse)	Rodents	unaffected pathogenicity;reduced virulence	1534	2
Q4WK03	PHI:2544	PAB1	Poly(A)-binding protein of cytoplasm and nucleus	746128	Aspergillus fumigatus	Lethal pathogen phenotype	Lethal pathogen phenotype	Lethal pathogen phenotype	lethal	660	15
Q9Y8A2	PHI:255	FUM1 (FUM5)	Polyketide synthase	5127	Fusarium fujikuroi	4530	Oryza sativa (related: rice)	Monocots	unaffected pathogenicity	24	1
Q5AHG6	PHI:2557	CaSch9p	Protein kinase	5476	Candida albicans	10090	Mus musculus (related: house mouse)	Rodents	reduced virulence	132	1
Q2L8G9	PHI:2616	InlA	-	1639	Listeria monocytogenes	10090	Mus musculus (related: house mouse)	Rodents	unaffected pathogenicity	2912	13
P65882	PHI:2625;PHI:9416	purA	Pathogenicity island;Adenylosuccinate synthetase	28901	Salmonella enterica	7955	Danio rerio (related: zebrafish)	Bony fishes	reduced virulence;loss of pathogenicity	30216	3
P0A2P8	PHI:2672	fruR	Regulators of systemic infection	28901	Salmonella enterica	10090	Mus musculus (related: house mouse)	Rodents	reduced virulence	39918	6
O42825	PHI:270	RHO1	GTP-binding protein	5476	Candida albicans	10090	Mus musculus (related: house mouse)	Rodents	loss of pathogenicity	170	4
J7MF98	PHI:2700	lac2	Laccase gene	5465	Colletotrichum orbiculare	3659	Cucumis sativus (related: cucumber)	Eudicots	reduced virulence	530	1
I1RZZ3	PHI:2728	FgERG4	Sterol C-24 reductase	5518	Fusarium graminearum	4081;4565	Solanum lycopersicum (related: tomato);Triticum aestivum (related: bread wheat)	Eudicots;Monocots	reduced virulence	4	1
C5A9K2	PHI:2754	T3SS	Tool for translocating pathogen effectors to monocot cells	337	Burkholderia glumae	4530	Oryza sativa (related: rice)	Monocots	effector (plant avirulence determinant)	4638	3
I7F9U1	PHI:2805	cbp40	Collagen type 1-binding protein	1307	Streptococcus suis	7955	Danio rerio (related: zebrafish)	Bony fishes	reduced virulence	182	1
Q5RZ66	PHI:2846	TRR1	Thioredoxin reductase	5207	Cryptococcus neoformans	Lethal pathogen phenotype	Lethal pathogen phenotype	Lethal pathogen phenotype	lethal	46724	32
Q48473	PHI:2872	ompK36	Outer membrane protein	573	Klebsiella pneumoniae	10090	Mus musculus (related: house mouse)	Rodents	reduced virulence	35544	20
Q4ZY22	PHI:2877	ecf11	ECF sigma factor	317	Pseudomonas syringae	3885	Phaseolus vulgaris (related: kidney bean)	Eudicots	unaffected pathogenicity	4826	2
Q8J2N0	PHI:301	foSNF1	Protein Kinase	5507	Fusarium oxysporum	3702;3712	Arabidopsis thaliana (related: thale cress);Brassica oleracea (no common name found)	Eudicots	reduced virulence	62	1
C4PCU2	PHI:3012	rcsB	RcsA and RcsB form a complex to promote transcription of the genes for capsule synthesis.	28901	Salmonella enterica	10090	Mus musculus (related: house mouse)	Rodents	unaffected pathogenicity	814	1
X5IFG8	PHI:3025	RnPKS1	polyketide synthase	77044	Rosellinia necatrix	106564	Malus prunifolia (no common name)	Eudicots	unaffected pathogenicity	114	1
A5CUE1	PHI:3027	Vatr1	TetR family of transcriptional regulators	28447	Clavibacter michiganensis	4081	Solanum lycopersicum (related: tomato)	Eudicots	reduced virulence	2982	4
O13359	PHI:306;PHI:9474	KEX2;kex2	Serine protease;Kexin Gene	5476	Candida albicans	7137	Galleria mellonella (related: greater wax moth)	Moths	reduced virulence	18	2
P42375	PHI:3085	GroEL	folding of newly synthesized proteins, preventing misfolding and aggregation	837	Porphyromonas gingivalis	10114	Rattus (related: rat)	Rodents	increased virulence (hypervirulence)	57936	28
H3RJ93	PHI:3091	OxyR	activate gene expression in response to oxidative stress	66269	Pantoea stewartii	4577	Zea mays (related: maize)	Monocots	unaffected pathogenicity	11142	1
Q884G3	PHI:3117	PSPTO_2130	DNA-binding response regulator	317	Pseudomonas syringae	4081;4097	Solanum lycopersicum (related: tomato);Nicotiana tabacum (related: common tobacco)	Eudicots	unaffected pathogenicity	29504	1
I1REF2	PHI:3138	ELP3	Member of the GNAT family, is the catalytic subunit of the Elongator complex.	5518	Fusarium graminearum	4565	Triticum aestivum (related: bread wheat)	Monocots	reduced virulence	60	2
Q8DRE1	PHI:3148	spr0177	essential gene	1313	Streptococcus pneumoniae	Lethal pathogen phenotype	Lethal pathogen phenotype	Lethal pathogen phenotype	lethal	2024	7
P67331	PHI:3154	spr0084	pathogenitcity related	1313	Streptococcus pneumoniae	10090	Mus musculus (related: house mouse)	Rodents	reduced virulence	34832	30
Q8DMX7	PHI:3158	spr2028	pathogenitcity related	1313	Streptococcus pneumoniae	10090	Mus musculus (related: house mouse)	Rodents	reduced virulence	10084	5
Q8DPA4	PHI:3160	spr1268	-	1313	Streptococcus pneumoniae	10090	Mus musculus (related: house mouse)	Rodents	unaffected pathogenicity	2718	2
Q9C0N4	PHI:318	SOD1	Superoxide dismutase	552467	Cryptococcus gattii vgiii	10090	Mus musculus (related: house mouse)	Rodents	reduced virulence;loss of pathogenicity	36	1
B2SJZ4	PHI:3218	RpoN2	Flagellar motility	347	Xanthomonas oryzae	4530	Oryza sativa (related: rice)	Monocots	reduced virulence	18	1
G4MU34	PHI:3257	MoIlv1	Threonine deaminase	318829	Magnaporthe oryzae	4530	Oryza sativa (related: rice)	Monocots	reduced virulence	8878	8
Q5H3L0	PHI:2446	ColS	-	347	Xanthomonas oryzae	4530	Oryza sativa (related: rice)	Monocots	reduced virulence	30454	5
E3P6S0	PHI:2474	imd1	GTP Biosynthesis	5207	Cryptococcus neoformans	10090;6239	Mus musculus (related: house mouse);Caenorhabditis elegans (related: roundworm)	Rodents;Nematodes	reduced virulence	252	3
Q4P0K0	PHI:2498	atg1	Autophagy	5270	Ustilago maydis	4577	Zea mays (related: maize)	Monocots	reduced virulence;loss of pathogenicity	50	3
Q4X0J6	PHI:2517	TRPS	Tryptophan synthase	746128	Aspergillus fumigatus	Lethal pathogen phenotype	Lethal pathogen phenotype	Lethal pathogen phenotype	lethal	35632	26
Q4X1I3	PHI:2545	TIF35	Translation initiation factor eIF3	746128	Aspergillus fumigatus	Lethal pathogen phenotype	Lethal pathogen phenotype	Lethal pathogen phenotype	lethal	2872	2
C4XXN5	PHI:2640	CNB1	Calcium-activated protein phosphatase	36911	Clavispora lusitaniae	10090	Mus musculus (related: house mouse)	Rodents	reduced virulence	14	1
P76002	PHI:2648	pliG	Lysozyme inhibitor	562	Escherichia coli	9031	Gallus gallus (related: chicken)	Birds	unaffected pathogenicity	5432	4
P08982	PHI:2686	envZ	Regulators of systemic infection	28901	Salmonella enterica	10090	Mus musculus (related: house mouse)	Rodents	reduced virulence	15338	13
P08191	PHI:2690;PHI:7180;PHI:7204;PHI:7846;PHI:8107	FimH;fimH	Adhesion;Virulence factor;Adhesin which binds mannose with stereochemical specificity;Type 1 pilus-associated adhesin;Type 1 pilus;Type 1 pilus-associated mannose-binding adhesin	562	Escherichia coli	10090	Mus musculus (related: house mouse)	Rodents	reduced virulence	17052	3
P08191	PHI:2690;PHI:7180;PHI:7204;PHI:7846;PHI:8107	FimH;fimH	Adhesion;Virulence factor;Adhesin which binds mannose with stereochemical specificity;Type 1 pilus-associated adhesin;Type 1 pilus;Type 1 pilus-associated mannose-binding adhesin	562	Escherichia coli	10090	Mus musculus (related: house mouse)	Rodents	reduced virulence	17052	3
Q6CZA0	PHI:2695	metJ	Repressor of the methionine biosynthesis regulon	29471	Pectobacterium atrosepticum	4113	Solanum tuberosum (related: potato)	Eudicots	reduced virulence	374	1
G1UA02	PHI:2819	CaEss1	Peptidyl-prolyl cis/trans isomerase	5476	Candida albicans	10090	Mus musculus (related: house mouse)	Rodents	reduced virulence	792	5
C3JXE8	PHI:2835	RED2	Putative short chain dehydrogenase	5016	Bipolaris maydis	4577	Zea mays (related: maize)	Monocots	reduced virulence	148	2
Q8NJQ2	PHI:2839	RED1	Reductase	5016	Bipolaris maydis	4577	Zea mays (related: maize)	Monocots	reduced virulence	21754	5
Q874K8	PHI:286	CLC-A	Chloride Channel	5207	Cryptococcus neoformans	10090	Mus musculus (related: house mouse)	Rodents	reduced virulence	38406	4
Q4ZY22	PHI:2877	ecf11	ECF sigma factor	317	Pseudomonas syringae	3885	Phaseolus vulgaris (related: kidney bean)	Eudicots	unaffected pathogenicity	4826	1
A7F6V9	PHI:2911	Ss-pth2	Peroxysomal Carnitine Acetyl Transferase	5180	Sclerotinia sclerotiorum	3847	Glycine max (related: soybean)	Eudicots	reduced virulence	120	1
A7F6V9	PHI:2911	Ss-pth2	Peroxysomal Carnitine Acetyl Transferase	5180	Sclerotinia sclerotiorum	3847	Glycine max (related: soybean)	Eudicots	reduced virulence	120	1
C5BEV2	PHI:2962	glyA	Serine h ydroxymethyltra nsferase	67780	Edwardsiella ictaluri	7998	Ictalurus punctatus (related: channel catfish)	Bony fishes	reduced virulence	52630	53
Q2FZ08	PHI:2965;PHI:6427;PHI:8891	rny;cvfA	Ribonuclease Y;Virulence factor;RNA modification enzyme regulating RNA degradation	1280	Staphylococcus aureus	7137	Galleria mellonella (related: greater wax moth)	Moths	reduced virulence	31928	15
B7HLG1	PHI:2982	CodY	Nutrient-responsive regulator	1396	Bacillus cereus	7137	Galleria mellonella (related: greater wax moth)	Moths	reduced virulence	10440	6
Q52G60	PHI:2991	MGG_01426.6	Transcription factor	318829	Magnaporthe oryzae	4530	Oryza sativa (related: rice)	Monocots	reduced virulence	18	1
Q82Z33	PHI:2997	EF3245	Cell-envelope associated acid phosphatase	1351	Enterococcus faecalis	7137	Galleria mellonella (related: greater wax moth)	Moths	unaffected pathogenicity	26906	60
Q9S1J0	PHI:3008	zmpR	Putative response regulator	1313	Streptococcus pneumoniae	10090	Mus musculus (related: house mouse)	Rodents	unaffected pathogenicity	100940	81
A5CVB7	PHI:3028	Vatr2	MocR family of transcriptional regulators	28447	Clavibacter michiganensis	4081	Solanum lycopersicum (related: tomato)	Eudicots	reduced virulence	26202	5
Q5KAF1	PHI:3029	PMT2	protein-O-mannosyltransferase	5207	Cryptococcus neoformans	Lethal pathogen phenotype;7091	Lethal pathogen phenotype;Bombyx mori (related: domestic silkworm)	Lethal pathogen phenotype;Moths	lethal;increased virulence (hypervirulence)	72	1
P27243	PHI:3106;PHI:9414	rfaL (ocw);waaL	encodes O-antigen ligase;O antigen ligase	562	Escherichia coli	10090;9606	Mus musculus (related: house mouse);Homo sapiens (related: human)	Rodents;Primates	reduced virulence	13022	2
Q884G3	PHI:3117	PSPTO_2130	DNA-binding response regulator	317	Pseudomonas syringae	4081;4097	Solanum lycopersicum (related: tomato);Nicotiana tabacum (related: common tobacco)	Eudicots	unaffected pathogenicity	29504	10
P50601	PHI:3137	TolB	Periplasmic component of the Tol-Pal system, a multi-protein complex present in almost all Gram-negative bacteria which connects the cytoplasmic (or inner) membrane with the outer membrane.	287	Pseudomonas aeruginosa	7137	Galleria mellonella (related: greater wax moth)	Moths	reduced virulence	23314	7
Q8DP67	PHI:3151	spr1327	essential gene	1313	Streptococcus pneumoniae	Lethal pathogen phenotype	Lethal pathogen phenotype	Lethal pathogen phenotype	lethal	3242	12
P06653	PHI:3152	lytA	pathogenitcity related	1313	Streptococcus pneumoniae	10090	Mus musculus (related: house mouse)	Rodents	reduced virulence	1728	13
P67267	PHI:3159	spr1010	pathogenitcity related	1313	Streptococcus pneumoniae	10090	Mus musculus (related: house mouse)	Rodents	reduced virulence	4252	16
B4E5A1	PHI:3170	paaB	phenylacetic acid catabolism	95486	Burkholderia cenocepacia	6239	Caenorhabditis elegans (related: roundworm)	Nematodes	reduced virulence	4402	4
B4E599	PHI:3171	paaD	phenylacetic acid catabolism	95486	Burkholderia cenocepacia	6239	Caenorhabditis elegans (related: roundworm)	Nematodes	reduced virulence	8042	2
Q5GZM8	PHI:3219	fleQ	Flagellar motility	347	Xanthomonas oryzae	4530	Oryza sativa (related: rice)	Monocots	unaffected pathogenicity	71820	5
Q09JB7	PHI:2482	AlHK1	Group III two-component Histidine Kinase	160389	Alternaria longipes	4097	Nicotiana tabacum (related: common tobacco)	Eudicots	increased virulence (hypervirulence)	2042	1
Q4WEN8	PHI:2522	SPE2	S-Adenosyl-methionine decarboxylase	746128	Aspergillus fumigatus	Lethal pathogen phenotype	Lethal pathogen phenotype	Lethal pathogen phenotype	lethal	68	1
Q4WKJ9	PHI:2546	BRX1	Protein required for rRNA maturation	746128	Aspergillus fumigatus	Lethal pathogen phenotype	Lethal pathogen phenotype	Lethal pathogen phenotype	lethal	50	2
Q4WMS3	PHI:2549	MAK5	Probable RNA-helicase of the DEAD box family	746128	Aspergillus fumigatus	Lethal pathogen phenotype	Lethal pathogen phenotype	Lethal pathogen phenotype	lethal	1126	4
Q7YZA8	PHI:2589	TcGALE	UDP-glucose 4 -epimerase is encoded by the TcGALE gene	5693	Trypanosoma cruzi	Lethal pathogen phenotype	Lethal pathogen phenotype	Lethal pathogen phenotype	lethal	22064	8
P18177	PHI:2619;PHI:4964;PHI:5010;PHI:6499;PHI:7473;PHI:9029	tcdB;TcdB	Virulence factor;Toxin B;Exotoxins;Responsible for the fluid secretion, inflammation, and colonic tissue damage associated with disease;Major virulent factor toxin which induces autophagy response in host cells through its glucosyltransferase activity;Exotoxin	1496	Clostridioides difficile	10090	Mus musculus (related: house mouse)	Rodents	unaffected pathogenicity;reduced virulence;loss of pathogenicity	1590	1
I6Y8D3	PHI:2631	GLKA	Glucokinase	1773	Mycobacterium tuberculosis	10090	Mus musculus (related: house mouse)	Rodents	unaffected pathogenicity;reduced virulence	9564	25
A0A0H2XHH2	PHI:2634	argF	Ornithine carbamoyltransferase	1280	Staphylococcus aureus	10090	Mus musculus (related: house mouse)	Rodents	unaffected pathogenicity	29342	24
Q8MYK0	PHI:2636	TgCDPK3	Calcium Dependent Kinase 3	5811	Toxoplasma gondii	9606	Homo sapiens (related: human)	Primates	reduced virulence	80	3
P0A2P8	PHI:2672	fruR	Regulators of systemic infection	28901	Salmonella enterica	10090	Mus musculus (related: house mouse)	Rodents	reduced virulence	39918	32
P64394	PHI:2673	himD	Regulators of systemic infection	28901	Salmonella enterica	10090	Mus musculus (related: house mouse)	Rodents	reduced virulence	2242	5
P0DM81	PHI:2683	rpoS	Regulators of systemic infection	28901	Salmonella enterica	10090	Mus musculus (related: house mouse)	Rodents	reduced virulence	40178	28
Q6FUI3	PHI:2691	IRE1	Transmembrane kinase/endoribonuclease	5478	Candida glabrata	10090	Mus musculus (related: house mouse)	Rodents	reduced virulence	54	2
Q97S30	PHI:2734	metF	Methionine biosynthesis enzymes	1313	Streptococcus pneumoniae	10090	Mus musculus (related: house mouse)	Rodents	unaffected pathogenicity;reduced virulence	4070	2
Q97S30	PHI:2734	metF	Methionine biosynthesis enzymes	1313	Streptococcus pneumoniae	10090	Mus musculus (related: house mouse)	Rodents	unaffected pathogenicity;reduced virulence	4070	17
P9WJV2	PHI:2740	MmpL4	Iron-regulated genes encoding predicted outer membrane proteins	1773	Mycobacterium tuberculosis	10090	Mus musculus (related: house mouse)	Rodents	reduced virulence	56	1
Q02LV7	PHI:2746	treZ	Trehalose biosynthetic genes	287	Pseudomonas aeruginosa	3702;10090;6239;7227	Arabidopsis thaliana (related: thale cress);Mus musculus (related: house mouse);Caenorhabditis elegans (related: roundworm);Drosophila melanogaster (related: fruit fly)	Eudicots;Rodents;Nematodes;Flies	unaffected pathogenicity;reduced virulence	872	1
Q874K8	PHI:286	CLC-A	Chloride Channel	5207	Cryptococcus neoformans	10090	Mus musculus (related: house mouse)	Rodents	reduced virulence	38406	27
B9JZT5	PHI:2894	F-avi3342	Peptide synthetase	373	Agrobacterium vitis	29760	Vitis vinifera (related: wine grape)	Eudicots	loss of pathogenicity	284	2
Q5HFZ4	PHI:2967	cvfC	Virulence factor	1280	Staphylococcus aureus	10090;7091	Mus musculus (related: house mouse);Bombyx mori (related: domestic silkworm)	Rodents;Moths	reduced virulence	1684	6
A7KT36	PHI:3007	srtD	Sortase	1313	Streptococcus pneumoniae	10090	Mus musculus (related: house mouse)	Rodents	reduced virulence	750	3
Q9S1J0	PHI:3008	zmpR	Putative response regulator	1313	Streptococcus pneumoniae	10090	Mus musculus (related: house mouse)	Rodents	unaffected pathogenicity	100940	45
A5CVB7	PHI:3028	Vatr2	MocR family of transcriptional regulators	28447	Clavibacter michiganensis	4081	Solanum lycopersicum (related: tomato)	Eudicots	reduced virulence	26202	27
Q667Y0	PHI:3043;PHI:7900	iscR;IscR	Type III secretion system;HTH-type transcriptional regulator	633	Yersinia pseudotuberculosis	9940	Ovis aries (related: sheep)	Even-toed ungulates	reduced virulence	2632	14
D0Z9U0	PHI:3074	hupA	Nucleoid-associated protein, is a basic DNA-binding protein involved in gene regulation	636	Edwardsiella tarda	7955	Danio rerio (related: zebrafish)	Bony fishes	reduced virulence	8420	1
H3RI38	PHI:3092	SoxR	activate gene expression in response to oxidative stress	66269	Pantoea stewartii	4577	Zea mays (related: maize)	Monocots	reduced virulence	42942	43
F4MD99	PHI:3113	stbA	Stability protein for the plasmid	562	Escherichia coli	10114	Rattus (related: rat)	Rodents	reduced virulence	30460	3
Q66EI1	PHI:3135	pdhR	Part of the pyruvate - tricarboxylic acid cycle node	633	Yersinia pseudotuberculosis	10090	Mus musculus (related: house mouse)	Rodents	reduced virulence	40064	19
I1REF2	PHI:3138	ELP3	Member of the GNAT family, is the catalytic subunit of the Elongator complex.	5518	Fusarium graminearum	4565	Triticum aestivum (related: bread wheat)	Monocots	reduced virulence	60	1
P69996	PHI:3145	urease	virulence determinants	210	Helicobacter pylori	7137	Galleria mellonella (related: greater wax moth)	Moths	reduced virulence	23686	13
Q8DP67	PHI:3151	spr1327	essential gene	1313	Streptococcus pneumoniae	Lethal pathogen phenotype	Lethal pathogen phenotype	Lethal pathogen phenotype	lethal	3242	20
Q8DMX7	PHI:3158	spr2028	pathogenitcity related	1313	Streptococcus pneumoniae	10090	Mus musculus (related: house mouse)	Rodents	reduced virulence	10084	13
G4MY59	PHI:3179	MoKIN1	kinases	318829	Magnaporthe oryzae	4530	Oryza sativa (related: rice)	Monocots	reduced virulence	1868	1
Q875L6	PHI:319	SQL2	Guanine nucleotide exchange factor	5270	Ustilago maydis	4577	Zea mays (related: maize)	Monocots	reduced virulence	86	1
Q9HWS6	PHI:3211;PHI:3212	BfmS	two-component sensor kinase	287	Pseudomonas aeruginosa	10090	Mus musculus (related: house mouse)	Rodents	reduced virulence	1554	1
Q9KPM7	PHI:3229	VC2340	c-di-GMPphosphodiesterases	666	Vibrio cholerae	10090	Mus musculus (related: house mouse)	Rodents	unaffected pathogenicity;reduced virulence	14	1
Q02QT9	PHI:3243	lsfA	1-Cys peroxiredoxin with thioldependent peroxidase activity	287	Pseudomonas aeruginosa	10090	Mus musculus (related: house mouse)	Rodents	reduced virulence	1476	2
Q4X132	PHI:2548	KRR1	Component of 90S preribosomal particles	746128	Aspergillus fumigatus	Lethal pathogen phenotype	Lethal pathogen phenotype	Lethal pathogen phenotype	lethal	38	1
G8BCQ2	PHI:2564	OLE1	Essential for unsaturated fatty acid (UFA) production	5480	Candida parapsilosis	10090	Mus musculus (related: house mouse)	Rodents	reduced virulence	628	2
Q94795	PHI:2580;PHI:2601	Oligopeptidase B	Oligopeptidase B functions as a processing enzyme, generating an active Ca2 agonist from a cytosolic precursor molecule	5693	Trypanosoma cruzi	10090	Mus musculus (related: house mouse)	Rodents	reduced virulence	22570	3
D0Z9I9	PHI:2642	FliC	Flagellin Protein	636	Edwardsiella tarda	7955	Danio rerio (related: zebrafish)	Bony fishes	reduced virulence	4484	3
P0AA28	PHI:2644	thioredoxin 1	Redox activity	28901	Salmonella enterica	6239	Caenorhabditis elegans (related: roundworm)	Nematodes	reduced virulence	28118	13
Q7CQF1	PHI:2679	hnr	Regulators of systemic infection	28901	Salmonella enterica	10090	Mus musculus (related: house mouse)	Rodents	reduced virulence	20028	9
Q6CZA0	PHI:2695	metJ	Repressor of the methionine biosynthesis regulon	29471	Pectobacterium atrosepticum	4113	Solanum tuberosum (related: potato)	Eudicots	reduced virulence	374	1
Q8PPR7	PHI:2699	HrpM	Synthesis of a cyclic glucan	346	Xanthomonas citri	37656;2708	Citrus x paradisi (related: grapefruit);Citrus limon (related: lemon)	Eudicots	loss of pathogenicity	2818	3
O42825	PHI:270	RHO1	GTP-binding protein	5476	Candida albicans	10090	Mus musculus (related: house mouse)	Rodents	loss of pathogenicity	170	3
I1RNL3	PHI:2715	PEX6	Peroxisomal biogenesis factor 6	5518	Fusarium graminearum	4565	Triticum aestivum (related: bread wheat)	Monocots	reduced virulence	536	1
C5A9K2	PHI:2754	T3SS	Tool for translocating pathogen effectors to monocot cells	337	Burkholderia glumae	4530	Oryza sativa (related: rice)	Monocots	effector (plant avirulence determinant)	4638	5
G1UA02	PHI:2819	CaEss1	Peptidyl-prolyl cis/trans isomerase	5476	Candida albicans	10090	Mus musculus (related: house mouse)	Rodents	reduced virulence	792	1
Q4ZXG1	PHI:2875	ecf7	FecI-type ECF sigma factor	317	Pseudomonas syringae	3885	Phaseolus vulgaris (related: kidney bean)	Eudicots	unaffected pathogenicity	15140	2
D4HUY5	PHI:2906;PHI:3673;PHI:3679	rpoN	a nitrogen limitation sigma factor;Sigma factor, regulating essential virulence gene expression	552	Erwinia amylovora	23211	Pyrus communis (related: pear)	Eudicots	loss of pathogenicity	27530	3
C5BDL7	PHI:2960	frdA	Fumarate reductase	67780	Edwardsiella ictaluri	7998	Ictalurus punctatus (related: channel catfish)	Bony fishes	reduced virulence	31110	29
C5BEV2	PHI:2962	glyA	Serine h ydroxymethyltra nsferase	67780	Edwardsiella ictaluri	7998	Ictalurus punctatus (related: channel catfish)	Bony fishes	reduced virulence	52630	26
P63786	PHI:3005	ClpP	Part of proteolytic complex	1280	Staphylococcus aureus	10090	Mus musculus (related: house mouse)	Rodents	reduced virulence	13798	4
A7KT36	PHI:3007	srtD	Sortase	1313	Streptococcus pneumoniae	10090	Mus musculus (related: house mouse)	Rodents	reduced virulence	750	3
Q9HUF2	PHI:3042	DipA	phosphodiesterases	287	Pseudomonas aeruginosa	10090	Mus musculus (related: house mouse)	Rodents	reduced virulence	10892	14
G8BDA6	PHI:3076;PHI:5349	CpATC1;atc1	Acid trehalase involved in trehalose hydrolysis;Trehalase	5480	Candida parapsilosis	7137	Galleria mellonella (related: greater wax moth)	Moths	reduced virulence	648	6
Q49GQ5	PHI:3086	prtA	encodes the virulence factor Protease A	29488	Photorhabdus luminescens	7137	Galleria mellonella (related: greater wax moth)	Moths	increased virulence (hypervirulence)	344	1
Q9RQU7	PHI:3125	Flagellin	motility	1496	Clostridioides difficile	10090	Mus musculus (related: house mouse)	Rodents	reduced virulence	9532	21
D4I307	PHI:3126;PHI:9305	argD	Acetylornithine/succinyldiaminopimelate aminotransferase;argDgene encodes a predicted N-acetylornithine aminotransferase enzyme	552	Erwinia amylovora	3750;4097	Malus domestica (related: apple);Nicotiana tabacum (related: common tobacco)	Eudicots	unaffected pathogenicity;reduced virulence;loss of pathogenicity	80132	18
L7JE74	PHI:3132	Mosch9	kinase	318829	Magnaporthe oryzae	4530	Oryza sativa (related: rice)	Monocots	reduced virulence	112	1
Q48252	PHI:3143;PHI:7342	CagE	virulence determinants;CAG pathogenicity island protein	210	Helicobacter pylori	9606	Homo sapiens (related: human)	Primates	reduced virulence	94	1
O25743	PHI:3146	GGT	virulence determinants	210	Helicobacter pylori	7137	Galleria mellonella (related: greater wax moth)	Moths	unaffected pathogenicity	11120	4
Q8DPV2	PHI:3157	spr0991	pathogenitcity related	1313	Streptococcus pneumoniae	10090	Mus musculus (related: house mouse)	Rodents	reduced virulence	11556	25
Q5GZN6	PHI:3220;PHI:4649;PHI:8310	fliC (XOO2581);fliC	Flagellar motility;Non motile flagella	347	Xanthomonas oryzae	4530	Oryza sativa (related: rice)	Monocots	unaffected pathogenicity;reduced virulence	1636	10
Q9KL18	PHI:3233	VCA0931	c-di-GMPphosphodiesterases	666	Vibrio cholerae	10090	Mus musculus (related: house mouse)	Rodents	unaffected pathogenicity;reduced virulence	1534	9
Q4WU51	PHI:2536	MET2	Homoserine O-acetyl-transferase	746128	Aspergillus fumigatus	Lethal pathogen phenotype;10090	Lethal pathogen phenotype;Mus musculus (related: house mouse)	Lethal pathogen phenotype;Rodents	lethal;unaffected pathogenicity	66	1
Q9Y8A2	PHI:255	FUM1 (FUM5)	Polyketide synthase	5127	Fusarium fujikuroi	4530	Oryza sativa (related: rice)	Monocots	unaffected pathogenicity	24	1
Q4D8D9	PHI:2592	TcNTR	-	5693	Trypanosoma cruzi	Lethal pathogen phenotype	Lethal pathogen phenotype	Lethal pathogen phenotype	lethal	30	1
D2EAX8	PHI:2604	Rim13	pH response / encodes a putative calcium-activated cys-teine protease (calpain-like)	5270	Ustilago maydis	4577	Zea mays (related: maize)	Monocots	unaffected pathogenicity	22	1
O51712	PHI:2637	RpoS	RpoS Regulates Essential Virulence Factors	139	Borreliella burgdorferi	10090	Mus musculus (related: house mouse)	Rodents	reduced virulence	4330	19
A1A7T3	PHI:2647	ivy	Lysozyme inhibitor	562	Escherichia coli	9031	Gallus gallus (related: chicken)	Birds	unaffected pathogenicity	7684	4
Q8ZQ52	PHI:2651	yedX	Cyclic amidohydrolase that hydrolyses 5-hydroxyisourate (5-HIU)	28901	Salmonella enterica	9031;10090	Gallus gallus (related: chicken);Mus musculus (related: house mouse)	Birds;Rodents	unaffected pathogenicity	6364	5
H8ZZ79	PHI:2710	mepB	Ammonium Transporters	474922	Colletotrichum gloeosporioides	3435	Persea americana (related: avocado)	Flowering plants	reduced virulence	4916	5
Q02LV5	PHI:2745	treY	Trehalose biosynthetic genes	287	Pseudomonas aeruginosa	3702;10090;6239;7227	Arabidopsis thaliana (related: thale cress);Mus musculus (related: house mouse);Caenorhabditis elegans (related: roundworm);Drosophila melanogaster (related: fruit fly)	Eudicots;Rodents;Nematodes;Flies	unaffected pathogenicity;reduced virulence	216	3
Q9HF03	PHI:280	CCN1	Cell cycle checkpoint	5207	Cryptococcus neoformans	10090	Mus musculus (related: house mouse)	Rodents	reduced virulence	58	3
Q5NH51	PHI:2870	acpC	Acid phosphatase activity	263	Francisella tularensis	10090	Mus musculus (related: house mouse)	Rodents	reduced virulence	3278	1
A7F519	PHI:2910	Shk1	Two-component histidine kinase	5180	Sclerotinia sclerotiorum	4081;3708;3659;3747	Solanum lycopersicum (related: tomato);Brassica napus (related: rape);Cucumis sativus (related: cucumber);Fragaria x ananassa (related: strawberry)	Eudicots	unaffected pathogenicity	3086	1
W7M5P0	PHI:2916	Ppr2	Protein phosphatase 2A regulatory subunit	117187	Fusarium verticillioides	4577	Zea mays (related: maize)	Monocots	unaffected pathogenicity	82	1
A0A024CHY2	PHI:2935	cifB	Nonribosomal peptide synthethase-encoding gene responsible for cichofactin biosynthesis	36746	Pseudomonas cichorii	4236	Lactuca sativa (related: garden lettuce)	Eudicots	reduced virulence	15596	7
C5BAT0	PHI:2961	gcvP	Glycine dehydrogenase	67780	Edwardsiella ictaluri	7998	Ictalurus punctatus (related: channel catfish)	Bony fishes	reduced virulence	56394	5
P63786	PHI:3005	ClpP	Part of proteolytic complex	1280	Staphylococcus aureus	10090	Mus musculus (related: house mouse)	Rodents	reduced virulence	13798	36
Q1KSF2	PHI:3102	BCKDH	ketoacid dehydrogenase (BCKDH) complex	5811	Toxoplasma gondii	10090	Mus musculus (related: house mouse)	Rodents	reduced virulence	9622	3
Q3BP62	PHI:3129	wxcB	The function of wxcBin the LPS biosynthesis cluster is related to the regulation of virulence, motility, biofilm formation, and SDS tolerance, but not LPS synthesis	339	Xanthomonas campestris	4081	Solanum lycopersicum (related: tomato)	Eudicots	reduced virulence	82	1
O25743	PHI:3146	GGT	virulence determinants	210	Helicobacter pylori	7137	Galleria mellonella (related: greater wax moth)	Moths	unaffected pathogenicity	11120	10
P06653	PHI:3152	lytA	pathogenitcity related	1313	Streptococcus pneumoniae	10090	Mus musculus (related: house mouse)	Rodents	reduced virulence	1728	2
P59206	PHI:3153	lytB	pathogenitcity related	1313	Streptococcus pneumoniae	10090	Mus musculus (related: house mouse)	Rodents	reduced virulence	306	5
Q8DPV2	PHI:3157	spr0991	pathogenitcity related	1313	Streptococcus pneumoniae	10090	Mus musculus (related: house mouse)	Rodents	reduced virulence	11556	4
P67267	PHI:3159	spr1010	pathogenitcity related	1313	Streptococcus pneumoniae	10090	Mus musculus (related: house mouse)	Rodents	reduced virulence	4252	7
Q9KLR1	PHI:3227	VCA0681	c-di-GMPphosphodiesterases	666	Vibrio cholerae	10090	Mus musculus (related: house mouse)	Rodents	unaffected pathogenicity;reduced virulence	3454	5
Q9KSB1	PHI:3230	VC1348	c-di-GMPphosphodiesterases	666	Vibrio cholerae	10090	Mus musculus (related: house mouse)	Rodents	unaffected pathogenicity;reduced virulence	17788	5
H2FL17	PHI:3242;PHI:4477	RpfF;rpfF	regulator of pathogenicity factors;signal factor-dependent quorum-sensing system that suppresses Outer membrane vesicles	2371	Xylella fastidiosa	29760	Vitis vinifera (related: wine grape)	Eudicots	increased virulence (hypervirulence)	176	1
Q9C1Q7	PHI:253	FOS1	Histidine Kinase	746128	Aspergillus fumigatus	10090	Mus musculus (related: house mouse)	Rodents	reduced virulence	53190	9
Q5AHG6	PHI:2557	CaSch9p	Protein kinase	5476	Candida albicans	10090	Mus musculus (related: house mouse)	Rodents	reduced virulence	132	3
Q2FIB5	PHI:2632	argH	Argininosuccinate lyase	1280	Staphylococcus aureus	10090	Mus musculus (related: house mouse)	Rodents	reduced virulence	28842	6
Q2FIB5	PHI:2632	argH	Argininosuccinate lyase	1280	Staphylococcus aureus	10090	Mus musculus (related: house mouse)	Rodents	reduced virulence	28842	24
Q7WP75	PHI:2645	ClpV	Translocation of T6SS effector proteins essential for virulence	518	Bordetella bronchiseptica	10090	Mus musculus (related: house mouse)	Rodents	reduced virulence	20390	18
Q9I1R1	PHI:2669	PA2206	LysR-type transcriptional regulators	287	Pseudomonas aeruginosa	7955	Danio rerio (related: zebrafish)	Bony fishes	reduced virulence	4362	1
Q7CQF1	PHI:2679	hnr	Regulators of systemic infection	28901	Salmonella enterica	10090	Mus musculus (related: house mouse)	Rodents	reduced virulence	20028	2
P0A2F0	PHI:2680	rpoE	Regulators of systemic infection	28901	Salmonella enterica	10090	Mus musculus (related: house mouse)	Rodents	reduced virulence	36002	7
P08982	PHI:2686	envZ	Regulators of systemic infection	28901	Salmonella enterica	10090	Mus musculus (related: house mouse)	Rodents	reduced virulence	15338	6
G2XD29	PHI:2731	VdSge1	Transcriptional regulator	27337	Verticillium dahliae	4081	Solanum lycopersicum (related: tomato)	Eudicots	loss of pathogenicity	90	1
I7F9U1	PHI:2805	cbp40	Collagen type 1-binding protein	1307	Streptococcus suis	7955	Danio rerio (related: zebrafish)	Bony fishes	reduced virulence	182	1
B9JV05	PHI:2895	F-avi4330	Polyketide synthetase protein	373	Agrobacterium vitis	29760	Vitis vinifera (related: wine grape)	Eudicots	loss of pathogenicity	11424	5
B9JV05	PHI:2895	F-avi4330	Polyketide synthetase protein	373	Agrobacterium vitis	29760	Vitis vinifera (related: wine grape)	Eudicots	loss of pathogenicity	11424	23
C5BDL7	PHI:2960	frdA	Fumarate reductase	67780	Edwardsiella ictaluri	7998	Ictalurus punctatus (related: channel catfish)	Bony fishes	reduced virulence	31110	12
G4N6W9	PHI:2996	MGG_06507.6	Transcription factor	318829	Magnaporthe oryzae	4530	Oryza sativa (related: rice)	Monocots	reduced virulence	4608	50
A7KT66	PHI:3006	rrgA	Ancillary pilus subunit	1313	Streptococcus pneumoniae	10090	Mus musculus (related: house mouse)	Rodents	reduced virulence	146	1
P58662	PHI:3011	rcsC11	Sensor protein	28901	Salmonella enterica	10090	Mus musculus (related: house mouse)	Rodents	unaffected pathogenicity;reduced virulence;increased virulence (hypervirulence)	112868	9
Q882D2	PHI:3119	PSPTO_2696	MutT/nudix family protein	317	Pseudomonas syringae	4081;4097	Solanum lycopersicum (related: tomato);Nicotiana tabacum (related: common tobacco)	Eudicots	unaffected pathogenicity	1068	9
J7I5J0	PHI:3139	PlCBP49	A modular, chitin-degrading protein, this enzyme is crucial for the degradation of the larval peritrophic matrix during infection.	1464	Paenibacillus larvae	7460	Apis mellifera (related: honey bee)	Bees	reduced virulence	7302	18
B8F4X8	PHI:3147	rfaE	Part of cluster invloved in lipooligosaccharide synthesis	738	Glaesserella parasuis	9823	Sus scrofa (related: pig)	Even-toed ungulates	reduced virulence	18624	14
G4MKP6	PHI:3161	Mohik5	Histidine Kinase	318829	Magnaporthe oryzae	4530	Oryza sativa (related: rice)	Monocots	loss of pathogenicity	6356	1
B4E598	PHI:3172	paaE	phenylacetic acid catabolism	95486	Burkholderia cenocepacia	6239	Caenorhabditis elegans (related: roundworm)	Nematodes	reduced virulence	31722	4
Q9C0N4	PHI:318	SOD1	Superoxide dismutase	552467	Cryptococcus gattii vgiii	10090	Mus musculus (related: house mouse)	Rodents	reduced virulence;loss of pathogenicity	36	1
Q70ZY8	PHI:2524	nudC	-	746128	Aspergillus fumigatus	Lethal pathogen phenotype	Lethal pathogen phenotype	Lethal pathogen phenotype	lethal	32	1
Q4WQJ0	PHI:2537	TRR1	Thioredoxin reductase	746128	Aspergillus fumigatus	Lethal pathogen phenotype	Lethal pathogen phenotype	Lethal pathogen phenotype	lethal	1534	6
Q4WX65	PHI:2540	IPP1	Inorganic pyrophosphatase	746128	Aspergillus fumigatus	Lethal pathogen phenotype	Lethal pathogen phenotype	Lethal pathogen phenotype	lethal	122	2
Q4X1I3	PHI:2545	TIF35	Translation initiation factor eIF3	746128	Aspergillus fumigatus	Lethal pathogen phenotype	Lethal pathogen phenotype	Lethal pathogen phenotype	lethal	2872	1
Q7YZA8	PHI:2589	TcGALE	UDP-glucose 4 -epimerase is encoded by the TcGALE gene	5693	Trypanosoma cruzi	Lethal pathogen phenotype	Lethal pathogen phenotype	Lethal pathogen phenotype	lethal	22064	40
Q59VQ3	PHI:262	MAD2	Spindle assembly checkpoint	5476	Candida albicans	10090	Mus musculus (related: house mouse)	Rodents	reduced virulence	44	1
Q7WP75	PHI:2645	ClpV	Translocation of T6SS effector proteins essential for virulence	518	Bordetella bronchiseptica	10090	Mus musculus (related: house mouse)	Rodents	reduced virulence	20390	9
E0IWR8	PHI:2646	MliC	Lysozyme inhibitor	562	Escherichia coli	9031	Gallus gallus (related: chicken)	Birds	unaffected pathogenicity;reduced virulence	6070	4
Q8TG24	PHI:265	MET3	ATP sulfurylase	5207	Cryptococcus neoformans	10090	Mus musculus (related: house mouse)	Rodents	loss of pathogenicity	2436	4
D0ZPP5	PHI:2656	pmrF	4-amino-4-deoxy-L-arabinose (Ara4N) production	28901	Salmonella enterica	10090	Mus musculus (related: house mouse)	Rodents	reduced virulence	31118	6
Q9UW87	PHI:267	MLT1	ABC transporter	5476	Candida albicans	10090	Mus musculus (related: house mouse)	Rodents	reduced virulence	3576	17
P64394	PHI:2673	himD	Regulators of systemic infection	28901	Salmonella enterica	10090	Mus musculus (related: house mouse)	Rodents	reduced virulence	2242	2
Q5H2X8	PHI:2737	SSBX	Single-stranded DNA-binding protein	347	Xanthomonas oryzae	4530	Oryza sativa (related: rice)	Monocots	reduced virulence	45688	41
B2ZRQ4	PHI:2802	3hnr	1,3,8 trihydroxynaphthalene reductase (3HNR)	93612	Exserohilum turcicum	4577	Zea mays (related: maize)	Monocots	unaffected pathogenicity	12018	3
G7TM01	PHI:2964	AsnB	Asparagine synthetase	347	Xanthomonas oryzae	4530	Oryza sativa (related: rice)	Monocots	reduced virulence	1154	4
Q82ZX2	PHI:2971	CspR	Cold shock protein	1351	Enterococcus faecalis	10090;7137	Mus musculus (related: house mouse);Galleria mellonella (related: greater wax moth)	Rodents;Moths	reduced virulence	1188	17
Q8KUC0	PHI:2999	EF0026	-	1351	Enterococcus faecalis	7137	Galleria mellonella (related: greater wax moth)	Moths	increased virulence (hypervirulence)	222	3
Q837N7	PHI:3000	EF0797	Conserved domain protein	1351	Enterococcus faecalis	7137	Galleria mellonella (related: greater wax moth)	Moths	increased virulence (hypervirulence)	3138	6
P0A1D7	PHI:3040	ClpP	proteolytic component	28901	Salmonella enterica	10090	Mus musculus (related: house mouse)	Rodents	reduced virulence	16304	2
Q9HUF2	PHI:3042	DipA	phosphodiesterases	287	Pseudomonas aeruginosa	10090	Mus musculus (related: house mouse)	Rodents	reduced virulence	10892	34
W7MB59	PHI:3053	FvHAP3	primary and secondary metabolism	117187	Fusarium verticillioides	4577	Zea mays (related: maize)	Monocots	reduced virulence	50	1
Q9L8G8	PHI:3055;PHI:4114	smcR;SmcR	quorum sensing regulator;major QS regulator	672	Vibrio vulnificus	10090	Mus musculus (related: house mouse)	Rodents	reduced virulence	1112	2
G4Z2B4	PHI:3071	PsTatD4	nuclease	67593	Phytophthora sojae	3847	Glycine max (related: soybean)	Eudicots	reduced virulence	22564	11
P42375	PHI:3085	GroEL	folding of newly synthesized proteins, preventing misfolding and aggregation	837	Porphyromonas gingivalis	10114	Rattus (related: rat)	Rodents	increased virulence (hypervirulence)	57936	57
Q8IEJ6	PHI:3101	BCKDH	ketoacid dehydrogenase (BCKDH) complex	5833	Plasmodium falciparum	9606	Homo sapiens (related: human)	Primates	reduced virulence	10618	1
Q8P8Q1	PHI:3112	galU	Uridine triphosphate (UTP)-glucose-1-phosphate uridylyltransferase	339	Xanthomonas campestris	3712	Brassica oleracea (no common name found)	Eudicots	loss of pathogenicity	31634	2
Q9RQU7	PHI:3125	Flagellin	motility	1496	Clostridioides difficile	10090	Mus musculus (related: house mouse)	Rodents	reduced virulence	9532	16
Q4R0Z0	PHI:3140	ArcD	arginine-ornithine antiporter	1307	Streptococcus suis	9606	Homo sapiens (related: human)	Primates	reduced virulence	12074	20
Q9I690	PHI:3166	PA0423	factor responsible for cytotoxicity in lung epithelial cells	287	Pseudomonas aeruginosa	9606	Homo sapiens (related: human)	Primates	reduced virulence	12072	8
Q8J2P6	PHI:317	RHBA	Nutrient signalling	746128	Aspergillus fumigatus	10090	Mus musculus (related: house mouse)	Rodents	reduced virulence	68	2
Q9KMV8	PHI:3228	VCA0210	c-di-GMPphosphodiesterases	666	Vibrio cholerae	10090	Mus musculus (related: house mouse)	Rodents	unaffected pathogenicity;reduced virulence	146	4
Q9FD00	PHI:2473	hrpx	Regulatory gene;part of the HrpX/HrpY Two-Component System	66269	Pantoea stewartii	4577	Zea mays (related: maize)	Monocots	reduced virulence	42456	25
Q8PGL8	PHI:2481	rfbC	O-antigen biosynthesis protein [truncated]	346	Xanthomonas citri	37656	Citrus x paradisi (related: grapefruit)	Eudicots	reduced virulence	24690	7
Q4WT66	PHI:2511	Pes1	Nonribosomal peptide synthetase gene	746128	Aspergillus fumigatus	7137	Galleria mellonella (related: greater wax moth)	Moths	reduced virulence	26	2
Q4WEM7	PHI:2521	GUS1	Glutamate-tRNA sythetase	746128	Aspergillus fumigatus	Lethal pathogen phenotype	Lethal pathogen phenotype	Lethal pathogen phenotype	lethal	17934	30
Q70ZY8	PHI:2524	nudC	-	746128	Aspergillus fumigatus	Lethal pathogen phenotype	Lethal pathogen phenotype	Lethal pathogen phenotype	lethal	32	2
Q4WCL5	PHI:2529	ERG10	Acetyl-CoA acetyl-transferase	746128	Aspergillus fumigatus	Lethal pathogen phenotype	Lethal pathogen phenotype	Lethal pathogen phenotype	lethal	48006	8
Q4WKG5	PHI:2530	TUB1	Tubulin alpha-1 chain	746128	Aspergillus fumigatus	Lethal pathogen phenotype;10090	Lethal pathogen phenotype;Mus musculus (related: house mouse)	Lethal pathogen phenotype;Rodents	lethal;loss of pathogenicity	2370	31
Q4WUA3	PHI:2532	HEM15	Ferrochelatase	746128	Aspergillus fumigatus	Lethal pathogen phenotype	Lethal pathogen phenotype	Lethal pathogen phenotype	lethal	2	1
Q8TG10	PHI:260	HDA1	Histone deacetylase	5270	Ustilago maydis	4577	Zea mays (related: maize)	Monocots	unaffected pathogenicity	86	3
I6Y8D3	PHI:2631	GLKA	Glucokinase	1773	Mycobacterium tuberculosis	10090	Mus musculus (related: house mouse)	Rodents	unaffected pathogenicity;reduced virulence	9564	9
Q2FFX4	PHI:2635	putA	Proline dehydrogenase	1280	Staphylococcus aureus	10090	Mus musculus (related: house mouse)	Rodents	unaffected pathogenicity	4226	2
A4HTK3	PHI:2643	CFAS	Cyclopropane fatty acid synthetase	5671	Leishmania infantum	10090	Mus musculus (related: house mouse)	Rodents	reduced virulence	27126	10
P69917	PHI:2682	csrA	Regulators of systemic infection	28901	Salmonella enterica	10090	Mus musculus (related: house mouse)	Rodents	reduced virulence	486	1
I1RNL3	PHI:2715	PEX6	Peroxisomal biogenesis factor 6	5518	Fusarium graminearum	4565	Triticum aestivum (related: bread wheat)	Monocots	reduced virulence	536	1
Q02LV7	PHI:2746	treZ	Trehalose biosynthetic genes	287	Pseudomonas aeruginosa	3702;10090;6239;7227	Arabidopsis thaliana (related: thale cress);Mus musculus (related: house mouse);Caenorhabditis elegans (related: roundworm);Drosophila melanogaster (related: fruit fly)	Eudicots;Rodents;Nematodes;Flies	unaffected pathogenicity;reduced virulence	872	4
Q9HF03	PHI:280	CCN1	Cell cycle checkpoint	5207	Cryptococcus neoformans	10090	Mus musculus (related: house mouse)	Rodents	reduced virulence	58	2
P39827	PHI:281	CDC10	Septin protein	5476	Candida albicans	10090	Mus musculus (related: house mouse)	Rodents	reduced virulence	6	1
Q04182	PHI:2815	pdr15	ATP binding cassette trans-porter of the plasma membrane implicated in general cellular detoxication	4932	Saccharomyces cerevisiae	6239	Caenorhabditis elegans (related: roundworm)	Nematodes	unaffected pathogenicity	18644	1
Q5ABG1	PHI:2825	SET1	Histone 3 lysine 4 methyltransferase	5476	Candida albicans	10090	Mus musculus (related: house mouse)	Rodents	reduced virulence	86	4
Q48473	PHI:2872	ompK36	Outer membrane protein	573	Klebsiella pneumoniae	10090	Mus musculus (related: house mouse)	Rodents	reduced virulence	35544	5
A0A024CIG8	PHI:2934	cifA	Nonribosomal peptide synthethase-encoding gene responsible for cichofactin biosynthesis	36746	Pseudomonas cichorii	4236	Lactuca sativa (related: garden lettuce)	Eudicots	reduced virulence	16232	1
Q9JP38	PHI:2975	ipx10	Effector	317	Pseudomonas syringae	3702;4081	Arabidopsis thaliana (related: thale cress);Solanum lycopersicum (related: tomato)	Eudicots	effector (plant avirulence determinant)	36292	4
B7HLG1	PHI:2982	CodY	Nutrient-responsive regulator	1396	Bacillus cereus	7137	Galleria mellonella (related: greater wax moth)	Moths	reduced virulence	10440	23
G4N6W9	PHI:2996	MGG_06507.6	Transcription factor	318829	Magnaporthe oryzae	4530	Oryza sativa (related: rice)	Monocots	reduced virulence	4608	56
Q9S1K2	PHI:3009	rr01	Response regulator	1313	Streptococcus pneumoniae	10090	Mus musculus (related: house mouse)	Rodents	reduced virulence	6378	46
E9F4P0	PHI:3069	MrAC	Adenylate cyclase	568076	Metarhizium robertsii	7137	Galleria mellonella (related: greater wax moth)	Moths	reduced virulence	74	2
G4Z2B4	PHI:3071	PsTatD4	nuclease	67593	Phytophthora sojae	3847	Glycine max (related: soybean)	Eudicots	reduced virulence	22564	1
B5UAE3	PHI:3093	Sbp2	involved in pili production	1307	Streptococcus suis	7955	Danio rerio (related: zebrafish)	Bony fishes	reduced virulence	8478	4
Q8CZ89	PHI:3155	spr0175	pathogenitcity related	1313	Streptococcus pneumoniae	10090	Mus musculus (related: house mouse)	Rodents	reduced virulence	4208	19
Q8DPY9	PHI:3156	spr0930	pathogenitcity related	1313	Streptococcus pneumoniae	10090	Mus musculus (related: house mouse)	Rodents	reduced virulence	4978	19
B4E598	PHI:3172	paaE	phenylacetic acid catabolism	95486	Burkholderia cenocepacia	6239	Caenorhabditis elegans (related: roundworm)	Nematodes	reduced virulence	31722	10
G4NCG1	PHI:3234	MoLYS20	regulators of G-protein (GTP-binding protein) signaling (RGS) proteins/homocitrate synthase	318829	Magnaporthe oryzae	4530	Oryza sativa (related: rice)	Monocots	reduced virulence	38	1
E3P6S0	PHI:2474	imd1	GTP Biosynthesis	5207	Cryptococcus neoformans	10090;6239	Mus musculus (related: house mouse);Caenorhabditis elegans (related: roundworm)	Rodents;Nematodes	reduced virulence	252	6
B8QZV4	PHI:2477	CYP1	Cyclophilin A-encoding gene	5116	Cryphonectria parasitica	60419	Castanea mollissima (related: chinese chestnut)	Eudicots	reduced virulence	88	2
Q4X0J6	PHI:2517	TRPS	Tryptophan synthase	746128	Aspergillus fumigatus	Lethal pathogen phenotype	Lethal pathogen phenotype	Lethal pathogen phenotype	lethal	35632	46
Q4WEM7	PHI:2521	GUS1	Glutamate-tRNA sythetase	746128	Aspergillus fumigatus	Lethal pathogen phenotype	Lethal pathogen phenotype	Lethal pathogen phenotype	lethal	17934	6
E9QY26	PHI:2535	ERG11B	14 alpha-demethylase	746128	Aspergillus fumigatus	Lethal pathogen phenotype;10090	Lethal pathogen phenotype;Mus musculus (related: house mouse)	Lethal pathogen phenotype;Rodents	lethal;unaffected pathogenicity;loss of pathogenicity	14	1
Q6FJF0	PHI:2561	Crz1	Transcription factor	5478	Candida glabrata	10090	Mus musculus (related: house mouse)	Rodents	reduced virulence	320	3
G8BCQ2	PHI:2564	OLE1	Essential for unsaturated fatty acid (UFA) production	5480	Candida parapsilosis	10090	Mus musculus (related: house mouse)	Rodents	reduced virulence	628	2
Q96WW9	PHI:258	GPABC1	ABC transporter	5128	Fusarium sambucinum	4113	Solanum tuberosum (related: potato)	Eudicots	reduced virulence	86	1
Q2FK80	PHI:2633	argB	Acetylglutamate kinase	1280	Staphylococcus aureus	10090	Mus musculus (related: house mouse)	Rodents	unaffected pathogenicity	11660	1
Q4X099	PHI:2638	Ilv3A	Dihydroxyacid dehydratase	746128	Aspergillus fumigatus	10090	Mus musculus (related: house mouse)	Rodents	reduced virulence	14934	29
Q4WK65	PHI:2639	Ilv3B	Dihydroxyacid dehydratase	746128	Aspergillus fumigatus	10090	Mus musculus (related: house mouse)	Rodents	unaffected pathogenicity;reduced virulence	15392	16
A9CFS9	PHI:2657	HspL	Functions as a VirB8 chaperone to promote T4SS-mediated DNA transfer	358	Agrobacterium tumefaciens	4113	Solanum tuberosum (related: potato)	Eudicots	reduced virulence	12162	4
Q4VSJ9	PHI:2666	tofR	Produce toxoflavin	337	Burkholderia glumae	4530	Oryza sativa (related: rice)	Monocots	unaffected pathogenicity;reduced virulence	8	1
Q97T11	PHI:2732	metQ	Methionine ABC transporter lipoprotein	1313	Streptococcus pneumoniae	10090	Mus musculus (related: house mouse)	Rodents	unaffected pathogenicity;reduced virulence	63822	17
P9WJV2	PHI:2740	MmpL4	Iron-regulated genes encoding predicted outer membrane proteins	1773	Mycobacterium tuberculosis	10090	Mus musculus (related: house mouse)	Rodents	reduced virulence	56	1
B2ZRQ4	PHI:2802	3hnr	1,3,8 trihydroxynaphthalene reductase (3HNR)	93612	Exserohilum turcicum	4577	Zea mays (related: maize)	Monocots	unaffected pathogenicity	12018	2
Q8NJ85	PHI:282	CDC11	Septin protein	5476	Candida albicans	10090	Mus musculus (related: house mouse)	Rodents	reduced virulence	50	1
W7M5P0	PHI:2916	Ppr2	Protein phosphatase 2A regulatory subunit	117187	Fusarium verticillioides	4577	Zea mays (related: maize)	Monocots	unaffected pathogenicity	82	2
C5BF98	PHI:2959	mdh	Malate dehydrogenase	67780	Edwardsiella ictaluri	7998	Ictalurus punctatus (related: channel catfish)	Bony fishes	reduced virulence	21832	4
Q2FYP3	PHI:2966	cvfB	Virulence factor	1280	Staphylococcus aureus	7091	Bombyx mori (related: domestic silkworm)	Moths	reduced virulence	11594	21
Q8J2N0	PHI:301	foSNF1	Protein Kinase	5507	Fusarium oxysporum	3702;3712	Arabidopsis thaliana (related: thale cress);Brassica oleracea (no common name found)	Eudicots	reduced virulence	62	2
P0A1D7	PHI:3040	ClpP	proteolytic component	28901	Salmonella enterica	10090	Mus musculus (related: house mouse)	Rodents	reduced virulence	16304	19
B5UAE3	PHI:3093	Sbp2	involved in pili production	1307	Streptococcus suis	7955	Danio rerio (related: zebrafish)	Bony fishes	reduced virulence	8478	12
Q87UQ6	PHI:3121	PSPTO_5240	Oxidoreductase, iron-sulfur-binding protein	317	Pseudomonas syringae	4081;4097	Solanum lycopersicum (related: tomato);Nicotiana tabacum (related: common tobacco)	Eudicots	unaffected pathogenicity	70	1
J7I5J0	PHI:3139	PlCBP49	A modular, chitin-degrading protein, this enzyme is crucial for the degradation of the larval peritrophic matrix during infection.	1464	Paenibacillus larvae	7460	Apis mellifera (related: honey bee)	Bees	reduced virulence	7302	13
P69996	PHI:3145	urease	virulence determinants	210	Helicobacter pylori	7137	Galleria mellonella (related: greater wax moth)	Moths	reduced virulence	23686	28
Q9I690	PHI:3166	PA0423	factor responsible for cytotoxicity in lung epithelial cells	287	Pseudomonas aeruginosa	9606	Homo sapiens (related: human)	Primates	reduced virulence	12072	6
G4MU34	PHI:3257	MoIlv1	Threonine deaminase	318829	Magnaporthe oryzae	4530	Oryza sativa (related: rice)	Monocots	reduced virulence	8878	30
E1AP33	PHI:2479	corA	Magnesium/nickel/cobalt transporter	554	Pectobacterium carotovorum	4039;4045	Daucus carota (related: carrot);Apium graveolens (no common name found)	Eudicots	reduced virulence	32774	8
Q4WXC5	PHI:2531	PRI1	DNA primase small subunit	746128	Aspergillus fumigatus	Lethal pathogen phenotype	Lethal pathogen phenotype	Lethal pathogen phenotype	lethal	126	2
Q4WGR1	PHI:2541	OLE1	Stearoyl-CoA desaturase	746128	Aspergillus fumigatus	Lethal pathogen phenotype	Lethal pathogen phenotype	Lethal pathogen phenotype	lethal	26	1
Q4WP25	PHI:2542	ERG12	Mavalonate kinase	746128	Aspergillus fumigatus	Lethal pathogen phenotype	Lethal pathogen phenotype	Lethal pathogen phenotype	lethal	2	1
Q4WHH1	PHI:2547	ESF1	Protein required for 18S rRNA biogenesis	746128	Aspergillus fumigatus	Lethal pathogen phenotype	Lethal pathogen phenotype	Lethal pathogen phenotype	lethal	6	1
Q4X132	PHI:2548	KRR1	Component of 90S preribosomal particles	746128	Aspergillus fumigatus	Lethal pathogen phenotype	Lethal pathogen phenotype	Lethal pathogen phenotype	lethal	38	1
Q5AG40	PHI:2553	VPS4	Pre-vacuolar protein sorting gene	5476	Candida albicans	10090	Mus musculus (related: house mouse)	Rodents	loss of pathogenicity	184	2
Q94795	PHI:2580;PHI:2601	Oligopeptidase B	Oligopeptidase B functions as a processing enzyme, generating an active Ca2 agonist from a cytosolic precursor molecule	5693	Trypanosoma cruzi	10090	Mus musculus (related: house mouse)	Rodents	reduced virulence	22570	10
D0ZWU0	PHI:2621;PHI:6966;PHI:8303	ssaV	Pathogenicity island;Secretion system apparatus protein;Salmonella pathogenicity island (SPI) 2 related protein	28901	Salmonella enterica	10090	Mus musculus (related: house mouse)	Rodents	unaffected pathogenicity;reduced virulence	254	2
P65882	PHI:2625;PHI:9416	purA	Pathogenicity island;Adenylosuccinate synthetase	28901	Salmonella enterica	7955	Danio rerio (related: zebrafish)	Bony fishes	reduced virulence;loss of pathogenicity	30216	9
Q4X099	PHI:2638	Ilv3A	Dihydroxyacid dehydratase	746128	Aspergillus fumigatus	10090	Mus musculus (related: house mouse)	Rodents	reduced virulence	14934	5
P0A1R0	PHI:2687	hfq	Regulators of systemic infection	28901	Salmonella enterica	10090	Mus musculus (related: house mouse)	Rodents	reduced virulence	3660	3
B2SME5	PHI:2729	PdeK	Two-component system PdeK/PdeR regulates c-di-GMP turnover	347	Xanthomonas oryzae	4530	Oryza sativa (related: rice)	Monocots	reduced virulence	41104	8
Q02LV5	PHI:2745	treY	Trehalose biosynthetic genes	287	Pseudomonas aeruginosa	3702;10090;6239;7227	Arabidopsis thaliana (related: thale cress);Mus musculus (related: house mouse);Caenorhabditis elegans (related: roundworm);Drosophila melanogaster (related: fruit fly)	Eudicots;Rodents;Nematodes;Flies	unaffected pathogenicity;reduced virulence	216	4
Q8NJQ2	PHI:2839	RED1	Reductase	5016	Bipolaris maydis	4577	Zea mays (related: maize)	Monocots	reduced virulence	21754	15
Q87BR6	PHI:2936	XhpT	Response regulator involved in surface attachment, cell-cell aggregation, exopolysaccharide production and virulence	2371	Xylella fastidiosa	29760	Vitis vinifera (related: wine grape)	Eudicots	reduced virulence	14180	4
J9VH94	PHI:2955	PKH2-02	Phosphoinositide-Dependent Kinase 1	5207	Cryptococcus neoformans	7137	Galleria mellonella (related: greater wax moth)	Moths	loss of pathogenicity	94	1
C5BF98	PHI:2959	mdh	Malate dehydrogenase	67780	Edwardsiella ictaluri	7998	Ictalurus punctatus (related: channel catfish)	Bony fishes	reduced virulence	21832	4
C5BAT0	PHI:2961	gcvP	Glycine dehydrogenase	67780	Edwardsiella ictaluri	7998	Ictalurus punctatus (related: channel catfish)	Bony fishes	reduced virulence	56394	37
Q5HFZ4	PHI:2967	cvfC	Virulence factor	1280	Staphylococcus aureus	10090;7091	Mus musculus (related: house mouse);Bombyx mori (related: domestic silkworm)	Rodents;Moths	reduced virulence	1684	5
Q837N7	PHI:3000	EF0797	Conserved domain protein	1351	Enterococcus faecalis	7137	Galleria mellonella (related: greater wax moth)	Moths	increased virulence (hypervirulence)	3138	1
A6QHK8	PHI:3004	ClpX	Part of proteolytic complex	1280	Staphylococcus aureus	10090	Mus musculus (related: house mouse)	Rodents	reduced virulence	72240	21
P54698	PHI:3013	rcsA	Positive regulator of capsular polysaccharide synthesis. RcsA and RcsB form a complex to promote transcription of the genes for capsule synthesis.	28901	Salmonella enterica	10090	Mus musculus (related: house mouse)	Rodents	increased virulence (hypervirulence)	14752	5
Q9I3S1	PHI:3041	BdlA	chemotaxis transducer protein	287	Pseudomonas aeruginosa	3702;10090	Arabidopsis thaliana (related: thale cress);Mus musculus (related: house mouse)	Eudicots;Rodents	reduced virulence;loss of pathogenicity	4272	13
P0C1S0	PHI:3058;PHI:6255	mgrA;MgrA	global regulator;member of the MarR (multiple antibiotic resistance regulator)/SarA (staphylococcal accessory regulator A) family proteins;Global Regulator	1280	Staphylococcus aureus	9986	Oryctolagus cuniculus (related: rabbit)	Rabbits & hares	reduced virulence	2784	13
Q9KTE2	PHI:3059	YbeY	essential endoribonuclease	666	Vibrio cholerae	10090	Mus musculus (related: house mouse)	Rodents	loss of pathogenicity	334	1
Q8IEJ6	PHI:3101	BCKDH	ketoacid dehydrogenase (BCKDH) complex	5833	Plasmodium falciparum	9606	Homo sapiens (related: human)	Primates	reduced virulence	10618	11
P27243	PHI:3106;PHI:9414	rfaL (ocw);waaL	encodes O-antigen ligase;O antigen ligase	562	Escherichia coli	10090;9606	Mus musculus (related: house mouse);Homo sapiens (related: human)	Rodents;Primates	reduced virulence	13022	5
Q8NK86	PHI:311	MGB1	G beta protein subunit	318829	Magnaporthe oryzae	4530	Oryza sativa (related: rice)	Monocots	loss of pathogenicity	50	2
Q665I9	PHI:3133	ptsN	Part of the pyruvate - tricarboxylic acid cycle node	633	Yersinia pseudotuberculosis	10090	Mus musculus (related: house mouse)	Rodents	reduced virulence	19846	2
Q66A26	PHI:3134	pykF	Part of the pyruvate - tricarboxylic acid cycle node	633	Yersinia pseudotuberculosis	10090	Mus musculus (related: house mouse)	Rodents	reduced virulence	46806	21
P59206	PHI:3153	lytB	pathogenitcity related	1313	Streptococcus pneumoniae	10090	Mus musculus (related: house mouse)	Rodents	reduced virulence	306	5
Q8DPA4	PHI:3160	spr1268	-	1313	Streptococcus pneumoniae	10090	Mus musculus (related: house mouse)	Rodents	unaffected pathogenicity	2718	11
W0H866	PHI:3165	hopA1	Effector (plant avirulence determinant)	36746	Pseudomonas cichorii	4081;3712;4073;3659;3847;4111;3656	Solanum lycopersicum (related: tomato);Brassica oleracea (no common name found);Capsicum frutescens (related: hot pepper);Cucumis sativus (related: cucumber);Glycine max (related: soybean);Solanum melongena (related: eggplant);Cucumis melo (related: muskmelon)	Eudicots	unaffected pathogenicity;effector (plant avirulence determinant)	130060	49
G4MY59	PHI:3179	MoKIN1	kinases	318829	Magnaporthe oryzae	4530	Oryza sativa (related: rice)	Monocots	reduced virulence	1868	1
Q9KSB1	PHI:3230	VC1348	c-di-GMPphosphodiesterases	666	Vibrio cholerae	10090	Mus musculus (related: house mouse)	Rodents	unaffected pathogenicity;reduced virulence	17788	17
Q8PGL8	PHI:2481	rfbC	O-antigen biosynthesis protein [truncated]	346	Xanthomonas citri	37656	Citrus x paradisi (related: grapefruit)	Eudicots	reduced virulence	24690	28
P96320	PHI:2499;PHI:4479	rcsB	Amylovoran production and pathogenticity;Phosphorelay system	552	Erwinia amylovora	23211	Pyrus communis (related: pear)	Eudicots	loss of pathogenicity	1184	2
D4I7B7	PHI:2500	rcsC	Phosphorelay system	552	Erwinia amylovora	23211	Pyrus communis (related: pear)	Eudicots	loss of pathogenicity	102	1
Q4WU51	PHI:2536	MET2	Homoserine O-acetyl-transferase	746128	Aspergillus fumigatus	Lethal pathogen phenotype;10090	Lethal pathogen phenotype;Mus musculus (related: house mouse)	Lethal pathogen phenotype;Rodents	lethal;unaffected pathogenicity	66	1
Q5A7S7	PHI:252	FKH2	Transcription factor	5476	Candida albicans	9606	Homo sapiens (related: human)	Primates	loss of pathogenicity	622	8
Q4WMS3	PHI:2549	MAK5	Probable RNA-helicase of the DEAD box family	746128	Aspergillus fumigatus	Lethal pathogen phenotype	Lethal pathogen phenotype	Lethal pathogen phenotype	lethal	1126	1
Q6FM61	PHI:2570	CYB2	Lactate dehydrogenase	5478	Candida glabrata	10090	Mus musculus (related: house mouse)	Rodents	reduced virulence	990	1
Q4D3W2	PHI:2575;PHI:2596	DHOD	Fumarate reductase activity	5693	Trypanosoma cruzi	Lethal pathogen phenotype	Lethal pathogen phenotype	Lethal pathogen phenotype	lethal	3750	4
Q2FFX4	PHI:2635	putA	Proline dehydrogenase	1280	Staphylococcus aureus	10090	Mus musculus (related: house mouse)	Rodents	unaffected pathogenicity	4226	8
Q4D3W2	PHI:2575;PHI:2596	DHOD	Fumarate reductase activity	5693	Trypanosoma cruzi	Lethal pathogen phenotype	Lethal pathogen phenotype	Lethal pathogen phenotype	lethal	3750	8
O51712	PHI:2637	RpoS	RpoS Regulates Essential Virulence Factors	139	Borreliella burgdorferi	10090	Mus musculus (related: house mouse)	Rodents	reduced virulence	4330	9
A4HTK3	PHI:2643	CFAS	Cyclopropane fatty acid synthetase	5671	Leishmania infantum	10090	Mus musculus (related: house mouse)	Rodents	reduced virulence	27126	6
Q4WK65	PHI:2639	Ilv3B	Dihydroxyacid dehydratase	746128	Aspergillus fumigatus	10090	Mus musculus (related: house mouse)	Rodents	unaffected pathogenicity;reduced virulence	15392	5
E0IWR8	PHI:2646	MliC	Lysozyme inhibitor	562	Escherichia coli	9031	Gallus gallus (related: chicken)	Birds	unaffected pathogenicity;reduced virulence	6070	2
D0Z9I9	PHI:2642	FliC	Flagellin Protein	636	Edwardsiella tarda	7955	Danio rerio (related: zebrafish)	Bony fishes	reduced virulence	4484	14
Q9I1R1	PHI:2669	PA2206	LysR-type transcriptional regulators	287	Pseudomonas aeruginosa	7955	Danio rerio (related: zebrafish)	Bony fishes	reduced virulence	4362	7
P0DM81	PHI:2683	rpoS	Regulators of systemic infection	28901	Salmonella enterica	10090	Mus musculus (related: house mouse)	Rodents	reduced virulence	40178	13
Q9UW87	PHI:267	MLT1	ABC transporter	5476	Candida albicans	10090	Mus musculus (related: house mouse)	Rodents	reduced virulence	3576	15
P0A1R0	PHI:2687	hfq	Regulators of systemic infection	28901	Salmonella enterica	10090	Mus musculus (related: house mouse)	Rodents	reduced virulence	3660	2
P40676	PHI:2678	slyA	Regulators of systemic infection	28901	Salmonella enterica	10090	Mus musculus (related: house mouse)	Rodents	reduced virulence	5164	5
G2XD29	PHI:2731	VdSge1	Transcriptional regulator	27337	Verticillium dahliae	4081	Solanum lycopersicum (related: tomato)	Eudicots	loss of pathogenicity	90	1
P0AA19	PHI:2685	ompR	Regulators of systemic infection	28901	Salmonella enterica	10090	Mus musculus (related: house mouse)	Rodents	reduced virulence	25142	4
Q97S31	PHI:2733	metE	Methionine biosynthesis enzymes	1313	Streptococcus pneumoniae	10090	Mus musculus (related: house mouse)	Rodents	unaffected pathogenicity;reduced virulence	7906	5
Q6D000	PHI:2694	rsmB	Modulates plant cell wall-degrading enzymes	29471	Pectobacterium atrosepticum	4113	Solanum tuberosum (related: potato)	Eudicots	reduced virulence;loss of pathogenicity	51348	72
D0KML5	PHI:2735	RsmA	Posttranscriptional regulator	55208	Pectobacterium wasabiae	4097;4113	Nicotiana tabacum (related: common tobacco);Solanum tuberosum (related: potato)	Eudicots	increased virulence (hypervirulence)	25716	12
Q5ABG1	PHI:2825	SET1	Histone 3 lysine 4 methyltransferase	5476	Candida albicans	10090	Mus musculus (related: house mouse)	Rodents	reduced virulence	86	1
D2SZX7	PHI:2837	OXI1	Putative short chain dehydrogenase	5016	Bipolaris maydis	4577	Zea mays (related: maize)	Monocots	reduced virulence	134	1
Q5RZ66	PHI:2846	TRR1	Thioredoxin reductase	5207	Cryptococcus neoformans	Lethal pathogen phenotype	Lethal pathogen phenotype	Lethal pathogen phenotype	lethal	46724	6
Q5NH51	PHI:2870	acpC	Acid phosphatase activity	263	Francisella tularensis	10090	Mus musculus (related: house mouse)	Rodents	reduced virulence	3278	4
A7F519	PHI:2910	Shk1	Two-component histidine kinase	5180	Sclerotinia sclerotiorum	4081;3708;3659;3747	Solanum lycopersicum (related: tomato);Brassica napus (related: rape);Cucumis sativus (related: cucumber);Fragaria x ananassa (related: strawberry)	Eudicots	unaffected pathogenicity	3086	1
Q48S75	PHI:2880	AspA	AgI/I I family adhesin protein	1314	Streptococcus pyogenes	10090	Mus musculus (related: house mouse)	Rodents	reduced virulence	1490	2
J9MZK9	PHI:2455	CRE1	Transcriptional repressor in lamentous fungi known to repress several CWDE genes and other genes required for assimilation of non-sugar carbon sources	5507	Fusarium oxysporum	4081	Solanum lycopersicum (related: tomato)	Eudicots	unaffected pathogenicity	92	1
A0A024CHY2	PHI:2935	cifB	Nonribosomal peptide synthethase-encoding gene responsible for cichofactin biosynthesis	36746	Pseudomonas cichorii	4236	Lactuca sativa (related: garden lettuce)	Eudicots	reduced virulence	15596	4
Q58PW8	PHI:2464	HsvA	hrp-associated systemic virulence	552	Erwinia amylovora	3750;23211	Malus domestica (related: apple);Pyrus communis (related: pear)	Eudicots	unaffected pathogenicity;reduced virulence	2982	1
Q7Z9J3	PHI:296	CZK3	MAP kinase kinase kinase	135779	Cercospora zeae-maydis	4577	Zea mays (related: maize)	Monocots	reduced virulence	52	1
E9R5E2	PHI:2513	GFA1	Glutamine-fructose-6-phosphate aminotransferase	746128	Aspergillus fumigatus	Lethal pathogen phenotype;10090	Lethal pathogen phenotype;Mus musculus (related: house mouse)	Lethal pathogen phenotype;Rodents	lethal;loss of pathogenicity	330	8
Q4WCZ1	PHI:2969	argEF	Acetylglutamate kinase and acetylglutamyl-phosphate-reductase	746128	Aspergillus fumigatus	7137	Galleria mellonella (related: greater wax moth)	Moths	reduced virulence	11242	7
Q9JP38	PHI:2975	ipx10	Effector	317	Pseudomonas syringae	3702;4081	Arabidopsis thaliana (related: thale cress);Solanum lycopersicum (related: tomato)	Eudicots	effector (plant avirulence determinant)	36292	13
Q4X1Y0	PHI:2514	PFS2	-	746128	Aspergillus fumigatus	Lethal pathogen phenotype	Lethal pathogen phenotype	Lethal pathogen phenotype	lethal	74	1
Q54151	PHI:2980	pic	Auto -transporter protein	623	Shigella flexneri	10090	Mus musculus (related: house mouse)	Rodents	reduced virulence	2290	1
P54698	PHI:3013	rcsA	Positive regulator of capsular polysaccharide synthesis. RcsA and RcsB form a complex to promote transcription of the genes for capsule synthesis.	28901	Salmonella enterica	10090	Mus musculus (related: house mouse)	Rodents	increased virulence (hypervirulence)	14752	1
Q4WWN9	PHI:2518	MET16	3'-Phospho-adenylylsulfate reductase	746128	Aspergillus fumigatus	Lethal pathogen phenotype	Lethal pathogen phenotype	Lethal pathogen phenotype	lethal	398	2
V9W6M6	PHI:3090	pamA	encodes paenilamicin, a secondary metabolite antibiotic	1464	Paenibacillus larvae	7460	Apis mellifera (related: honey bee)	Bees	reduced virulence	15286	20
A7KT66	PHI:3006	rrgA	Ancillary pilus subunit	1313	Streptococcus pneumoniae	10090	Mus musculus (related: house mouse)	Rodents	reduced virulence	146	2
Q4WJ71	PHI:2539	CDS1	CDP-diacyl glycerol synthase	746128	Aspergillus fumigatus	Lethal pathogen phenotype	Lethal pathogen phenotype	Lethal pathogen phenotype	lethal	70	2
B0RPP4	PHI:3108	RavR	bifunctional enzyme involved in c-di-GMP synthesis and degradation	339	Xanthomonas campestris	3712	Brassica oleracea (no common name found)	Eudicots	reduced virulence	54	1
Q5AG40	PHI:2553	VPS4	Pre-vacuolar protein sorting gene	5476	Candida albicans	10090	Mus musculus (related: house mouse)	Rodents	loss of pathogenicity	184	4
Q97NM0	PHI:3010	STM237	-	1313	Streptococcus pneumoniae	10090	Mus musculus (related: house mouse)	Rodents	reduced virulence	1100	1
F4MD99	PHI:3113	stbA	Stability protein for the plasmid	562	Escherichia coli	10114	Rattus (related: rat)	Rodents	reduced virulence	30460	11
P0AA28	PHI:2644	thioredoxin 1	Redox activity	28901	Salmonella enterica	6239	Caenorhabditis elegans (related: roundworm)	Nematodes	reduced virulence	28118	22
X5IFG8	PHI:3025	RnPKS1	polyketide synthase	77044	Rosellinia necatrix	106564	Malus prunifolia (no common name)	Eudicots	unaffected pathogenicity	114	1
Q882D2	PHI:3119	PSPTO_2696	MutT/nudix family protein	317	Pseudomonas syringae	4081;4097	Solanum lycopersicum (related: tomato);Nicotiana tabacum (related: common tobacco)	Eudicots	unaffected pathogenicity	1068	1
Q9L8G8	PHI:3055;PHI:4114	smcR;SmcR	quorum sensing regulator;major QS regulator	672	Vibrio vulnificus	10090	Mus musculus (related: house mouse)	Rodents	reduced virulence	1112	1
Q6FUI3	PHI:2691	IRE1	Transmembrane kinase/endoribonuclease	5478	Candida glabrata	10090	Mus musculus (related: house mouse)	Rodents	reduced virulence	54	1
Q665I9	PHI:3133	ptsN	Part of the pyruvate - tricarboxylic acid cycle node	633	Yersinia pseudotuberculosis	10090	Mus musculus (related: house mouse)	Rodents	reduced virulence	19846	16
G4MQB0	PHI:3066	MoRga6	Rho GTPase activating proteins	318829	Magnaporthe oryzae	4513;4530	Hordeum vulgare (related: barley);Oryza sativa (related: rice)	Monocots	unaffected pathogenicity	22	1
Q875L6	PHI:319	SQL2	Guanine nucleotide exchange factor	5270	Ustilago maydis	4577	Zea mays (related: maize)	Monocots	reduced virulence	86	1
Q6D000	PHI:2694	rsmB	Modulates plant cell wall-degrading enzymes	29471	Pectobacterium atrosepticum	4113	Solanum tuberosum (related: potato)	Eudicots	reduced virulence;loss of pathogenicity	51348	12
Q1KSF2	PHI:3102	BCKDH	ketoacid dehydrogenase (BCKDH) complex	5811	Toxoplasma gondii	10090	Mus musculus (related: house mouse)	Rodents	reduced virulence	9622	10
I1RC71	PHI:2714	PEX5	Peroxisomal targeting signal receptor	5518	Fusarium graminearum	4565	Triticum aestivum (related: bread wheat)	Monocots	reduced virulence	12	2
Q882D7	PHI:3118	PSPTO_2691	Membrane protein, TerC family	317	Pseudomonas syringae	4081;4097	Solanum lycopersicum (related: tomato);Nicotiana tabacum (related: common tobacco)	Eudicots	unaffected pathogenicity	33904	8
D0KML5	PHI:2735	RsmA	Posttranscriptional regulator	55208	Pectobacterium wasabiae	4097;4113	Nicotiana tabacum (related: common tobacco);Solanum tuberosum (related: potato)	Eudicots	increased virulence (hypervirulence)	25716	2
Q4R0Z0	PHI:3140	ArcD	arginine-ornithine antiporter	1307	Streptococcus suis	9606	Homo sapiens (related: human)	Primates	reduced virulence	12074	5
Q5H2X8	PHI:2737	SSBX	Single-stranded DNA-binding protein	347	Xanthomonas oryzae	4530	Oryza sativa (related: rice)	Monocots	reduced virulence	45688	38
Q8DRE1	PHI:3148	spr0177	essential gene	1313	Streptococcus pneumoniae	Lethal pathogen phenotype	Lethal pathogen phenotype	Lethal pathogen phenotype	lethal	2024	10
Q7LJU0	PHI:274	USX1	UDP-xylose synthase	5207	Cryptococcus neoformans	10090	Mus musculus (related: house mouse)	Rodents	loss of pathogenicity	20868	1
Q8DQV4	PHI:3149	spr0479	essential gene	1313	Streptococcus pneumoniae	Lethal pathogen phenotype	Lethal pathogen phenotype	Lethal pathogen phenotype	lethal	3688	25
Q7LJU0	PHI:274	USX1	UDP-xylose synthase	5207	Cryptococcus neoformans	10090	Mus musculus (related: house mouse)	Rodents	loss of pathogenicity	20868	10
Q8CYR5	PHI:3150	spr1035	essential gene	1313	Streptococcus pneumoniae	Lethal pathogen phenotype	Lethal pathogen phenotype	Lethal pathogen phenotype	lethal	282	3
C3JXE8	PHI:2835	RED2	Putative short chain dehydrogenase	5016	Bipolaris maydis	4577	Zea mays (related: maize)	Monocots	reduced virulence	148	1
Q8CZ89	PHI:3155	spr0175	pathogenitcity related	1313	Streptococcus pneumoniae	10090	Mus musculus (related: house mouse)	Rodents	reduced virulence	4208	22
C4PCU2	PHI:3012	rcsB	RcsA and RcsB form a complex to promote transcription of the genes for capsule synthesis.	28901	Salmonella enterica	10090	Mus musculus (related: house mouse)	Rodents	unaffected pathogenicity	814	2
B2SJZ4	PHI:3218	RpoN2	Flagellar motility	347	Xanthomonas oryzae	4530	Oryza sativa (related: rice)	Monocots	reduced virulence	18	1
Q667Y0	PHI:3043;PHI:7900	iscR;IscR	Type III secretion system;HTH-type transcriptional regulator	633	Yersinia pseudotuberculosis	9940	Ovis aries (related: sheep)	Even-toed ungulates	reduced virulence	2632	5
Q9KSG1	PHI:3232	VC1295	c-di-GMPphosphodiesterases	666	Vibrio cholerae	10090	Mus musculus (related: house mouse)	Rodents	unaffected pathogenicity;reduced virulence	60	2
Q882D7	PHI:3118	PSPTO_2691	Membrane protein, TerC family	317	Pseudomonas syringae	4081;4097	Solanum lycopersicum (related: tomato);Nicotiana tabacum (related: common tobacco)	Eudicots	unaffected pathogenicity	33904	13
Q02QT9	PHI:3243	lsfA	1-Cys peroxiredoxin with thioldependent peroxidase activity	287	Pseudomonas aeruginosa	10090	Mus musculus (related: house mouse)	Rodents	reduced virulence	1476	10
P50601	PHI:3137	TolB	Periplasmic component of the Tol-Pal system, a multi-protein complex present in almost all Gram-negative bacteria which connects the cytoplasmic (or inner) membrane with the outer membrane.	287	Pseudomonas aeruginosa	7137	Galleria mellonella (related: greater wax moth)	Moths	reduced virulence	23314	2
Q8DQV4	PHI:3149	spr0479	essential gene	1313	Streptococcus pneumoniae	Lethal pathogen phenotype	Lethal pathogen phenotype	Lethal pathogen phenotype	lethal	3688	9
G4NEB4	PHI:3173	Mosnf1	Central role in response to nutrient stress	318829	Magnaporthe oryzae	4530	Oryza sativa (related: rice)	Monocots	loss of pathogenicity	178	2
Q9HWS6	PHI:3211;PHI:3212	BfmS	two-component sensor kinase	287	Pseudomonas aeruginosa	10090	Mus musculus (related: house mouse)	Rodents	reduced virulence	1554	6
E1AP33	PHI:2479	corA	Magnesium/nickel/cobalt transporter	554	Pectobacterium carotovorum	4039;4045	Daucus carota (related: carrot);Apium graveolens (no common name found)	Eudicots	reduced virulence	32774	2
E9R5E2	PHI:2513	GFA1	Glutamine-fructose-6-phosphate aminotransferase	746128	Aspergillus fumigatus	Lethal pathogen phenotype;10090	Lethal pathogen phenotype;Mus musculus (related: house mouse)	Lethal pathogen phenotype;Rodents	lethal;loss of pathogenicity	330	6
Q4WXC5	PHI:2531	PRI1	DNA primase small subunit	746128	Aspergillus fumigatus	Lethal pathogen phenotype	Lethal pathogen phenotype	Lethal pathogen phenotype	lethal	126	2
Q4WQJ0	PHI:2537	TRR1	Thioredoxin reductase	746128	Aspergillus fumigatus	Lethal pathogen phenotype	Lethal pathogen phenotype	Lethal pathogen phenotype	lethal	1534	1
Q4WK03	PHI:2544	PAB1	Poly(A)-binding protein of cytoplasm and nucleus	746128	Aspergillus fumigatus	Lethal pathogen phenotype	Lethal pathogen phenotype	Lethal pathogen phenotype	lethal	660	6
Q59Z32	PHI:2554	Rck2	Hog1p-MAP kinase-activated protein kinase	5476	Candida albicans	10090	Mus musculus (related: house mouse)	Rodents	reduced virulence	30	1
Q6FPV9	PHI:2559	Slt2	Maintaining fungal cell wall integrity	5478	Candida glabrata	10090	Mus musculus (related: house mouse)	Rodents	reduced virulence;increased virulence (hypervirulence)	52	1
Q8TGB2	PHI:259	GPI7	Glycosylphosphatidylinositol modifying enzyme	5476	Candida albicans	10090	Mus musculus (related: house mouse)	Rodents	reduced virulence	28	1
Q2L8G9	PHI:2616	InlA	-	1639	Listeria monocytogenes	10090	Mus musculus (related: house mouse)	Rodents	unaffected pathogenicity	2912	5
P18177	PHI:2619;PHI:4964;PHI:5010;PHI:6499;PHI:7473;PHI:9029	tcdB;TcdB	Virulence factor;Toxin B;Exotoxins;Responsible for the fluid secretion, inflammation, and colonic tissue damage associated with disease;Major virulent factor toxin which induces autophagy response in host cells through its glucosyltransferase activity;Exotoxin	1496	Clostridioides difficile	10090	Mus musculus (related: house mouse)	Rodents	unaffected pathogenicity;reduced virulence;loss of pathogenicity	1590	4
Q2FK80	PHI:2633	argB	Acetylglutamate kinase	1280	Staphylococcus aureus	10090	Mus musculus (related: house mouse)	Rodents	unaffected pathogenicity	11660	9
Q5KQZ9	PHI:2652	magA	Contributes to K1 capsular polysaccharide (CPS) biosynthesis	573	Klebsiella pneumoniae	10090	Mus musculus (related: house mouse)	Rodents	reduced virulence	10224	1
P40676	PHI:2678	slyA	Regulators of systemic infection	28901	Salmonella enterica	10090	Mus musculus (related: house mouse)	Rodents	reduced virulence	5164	1
P0A2F0	PHI:2680	rpoE	Regulators of systemic infection	28901	Salmonella enterica	10090	Mus musculus (related: house mouse)	Rodents	reduced virulence	36002	5
F0XP73	PHI:2693	GcABC-G1	ABC efux transporter	226899	Grosmannia clavigera	3339	Pinus contorta (related: lodgepole pine)	Seed plants	reduced virulence	84	1
B2SME5	PHI:2729	PdeK	Two-component system PdeK/PdeR regulates c-di-GMP turnover	347	Xanthomonas oryzae	4530	Oryza sativa (related: rice)	Monocots	reduced virulence	41104	1
Q97T11	PHI:2732	metQ	Methionine ABC transporter lipoprotein	1313	Streptococcus pneumoniae	10090	Mus musculus (related: house mouse)	Rodents	unaffected pathogenicity;reduced virulence	63822	53
E1WEX6	PHI:2751	lpxO	Fe2+/alpha-ketoglutarate-dependent dioxygenase enzyme	28901	Salmonella enterica	10090	Mus musculus (related: house mouse)	Rodents	reduced virulence	18	1
E1WEX6	PHI:2751	lpxO	Fe2+/alpha-ketoglutarate-dependent dioxygenase enzyme	28901	Salmonella enterica	10090	Mus musculus (related: house mouse)	Rodents	reduced virulence	18	1
Q4ZXG1	PHI:2875	ecf7	FecI-type ECF sigma factor	317	Pseudomonas syringae	3885	Phaseolus vulgaris (related: kidney bean)	Eudicots	unaffected pathogenicity	15140	1
Q4ZZI8	PHI:2878	ecf18	ECF sigma factor	317	Pseudomonas syringae	3885	Phaseolus vulgaris (related: kidney bean)	Eudicots	unaffected pathogenicity	36	1
B9JZT5	PHI:2894	F-avi3342	Peptide synthetase	373	Agrobacterium vitis	29760	Vitis vinifera (related: wine grape)	Eudicots	loss of pathogenicity	284	2
D4HUY5	PHI:2906;PHI:3673;PHI:3679	rpoN	a nitrogen limitation sigma factor;Sigma factor, regulating essential virulence gene expression	552	Erwinia amylovora	23211	Pyrus communis (related: pear)	Eudicots	loss of pathogenicity	27530	19
Q87BQ4	PHI:2937	gumD	-	2371	Xylella fastidiosa	29760	Vitis vinifera (related: wine grape)	Eudicots	loss of pathogenicity	73842	44
Q2FZ08	PHI:2965;PHI:6427;PHI:8891	rny;cvfA	Ribonuclease Y;Virulence factor;RNA modification enzyme regulating RNA degradation	1280	Staphylococcus aureus	7137	Galleria mellonella (related: greater wax moth)	Moths	reduced virulence	31928	47
Q2FYP3	PHI:2966	cvfB	Virulence factor	1280	Staphylococcus aureus	7091	Bombyx mori (related: domestic silkworm)	Moths	reduced virulence	11594	7
Q82ZX2	PHI:2971	CspR	Cold shock protein	1351	Enterococcus faecalis	10090;7137	Mus musculus (related: house mouse);Galleria mellonella (related: greater wax moth)	Rodents;Moths	reduced virulence	1188	7
Q9S1K2	PHI:3009	rr01	Response regulator	1313	Streptococcus pneumoniae	10090	Mus musculus (related: house mouse)	Rodents	reduced virulence	6378	14
Q9I3S1	PHI:3041	BdlA	chemotaxis transducer protein	287	Pseudomonas aeruginosa	3702;10090	Arabidopsis thaliana (related: thale cress);Mus musculus (related: house mouse)	Eudicots;Rodents	reduced virulence;loss of pathogenicity	4272	3
W7MQF2	PHI:3054	FvHAP5	primary and secondary metabolism	117187	Fusarium verticillioides	4577	Zea mays (related: maize)	Monocots	reduced virulence	10	1
Q0PRN7	PHI:3056	luxO	upstream negative regulator of smcR	672	Vibrio vulnificus	7067	Tenebrio molitor (related: yellow mealworm)	Beetles	increased virulence (hypervirulence)	400	2
G4NF65	PHI:3061;PHI:4055	MoRga1;Rga1	LIM domain-containing proteins;Rho GTPase activating proteins	318829	Magnaporthe oryzae	4513;4530	Hordeum vulgare (related: barley);Oryza sativa (related: rice)	Monocots	unaffected pathogenicity	30	1
H3RJ93	PHI:3091	OxyR	activate gene expression in response to oxidative stress	66269	Pantoea stewartii	4577	Zea mays (related: maize)	Monocots	unaffected pathogenicity	11142	7
B0RPP4	PHI:3108	RavR	bifunctional enzyme involved in c-di-GMP synthesis and degradation	339	Xanthomonas campestris	3712	Brassica oleracea (no common name found)	Eudicots	reduced virulence	54	2
L7JE74	PHI:3132	Mosch9	kinase	318829	Magnaporthe oryzae	4530	Oryza sativa (related: rice)	Monocots	reduced virulence	112	2
Q66EI1	PHI:3135	pdhR	Part of the pyruvate - tricarboxylic acid cycle node	633	Yersinia pseudotuberculosis	10090	Mus musculus (related: house mouse)	Rodents	reduced virulence	40064	41
B4E599	PHI:3171	paaD	phenylacetic acid catabolism	95486	Burkholderia cenocepacia	6239	Caenorhabditis elegans (related: roundworm)	Nematodes	reduced virulence	8042	6
G2WS91	PHI:3208	VdMsb	encodes a transmembrane mucin	27337	Verticillium dahliae	3702;3635	Arabidopsis thaliana (related: thale cress);Gossypium hirsutum (related: cotton)	Eudicots	reduced virulence	6	1
Q5H3L0	PHI:2446	ColS	-	347	Xanthomonas oryzae	4530	Oryza sativa (related: rice)	Monocots	reduced virulence	30454	2
J9MZK9	PHI:2455	CRE1	Transcriptional repressor in lamentous fungi known to repress several CWDE genes and other genes required for assimilation of non-sugar carbon sources	5507	Fusarium oxysporum	4081	Solanum lycopersicum (related: tomato)	Eudicots	unaffected pathogenicity	92	1
Q7WTQ9	PHI:2469	AcrB	Multidrug efflux pump	552	Erwinia amylovora	3750	Malus domestica (related: apple)	Eudicots	reduced virulence	3358	2
Q96VA7	PHI:251	FGA1	G alpha protein subunit	5507	Fusarium oxysporum	4081	Solanum lycopersicum (related: tomato)	Eudicots	reduced virulence	38	1
Q4X146	PHI:2515	ALG7	UDP-N-acetyl-glucosamine-1-P transferase	746128	Aspergillus fumigatus	Lethal pathogen phenotype	Lethal pathogen phenotype	Lethal pathogen phenotype	lethal	2	1
Q5A7S7	PHI:252	FKH2	Transcription factor	5476	Candida albicans	9606	Homo sapiens (related: human)	Primates	loss of pathogenicity	622	9
Q6FJF0	PHI:2561	Crz1	Transcription factor	5478	Candida glabrata	10090	Mus musculus (related: house mouse)	Rodents	reduced virulence	320	6
Q5KQZ9	PHI:2652	magA	Contributes to K1 capsular polysaccharide (CPS) biosynthesis	573	Klebsiella pneumoniae	10090	Mus musculus (related: house mouse)	Rodents	reduced virulence	10224	4
Q7D412	PHI:2659	hspAT1	Alpha-crystallin-type small heat shock proteins	358	Agrobacterium tumefaciens	4113	Solanum tuberosum (related: potato)	Eudicots	unaffected pathogenicity;reduced virulence	14	1
P0AA19	PHI:2685	ompR	Regulators of systemic infection	28901	Salmonella enterica	10090	Mus musculus (related: house mouse)	Rodents	reduced virulence	25142	22
H8ZZ79	PHI:2710	mepB	Ammonium Transporters	474922	Colletotrichum gloeosporioides	3435	Persea americana (related: avocado)	Flowering plants	reduced virulence	4916	11
Q97S31	PHI:2733	metE	Methionine biosynthesis enzymes	1313	Streptococcus pneumoniae	10090	Mus musculus (related: house mouse)	Rodents	unaffected pathogenicity;reduced virulence	7906	20
C3JXE9	PHI:2836	RED3	Putative short chain dehydrogenase	5016	Bipolaris maydis	4577	Zea mays (related: maize)	Monocots	reduced virulence	2854	5
D2SZX7	PHI:2837	OXI1	Putative short chain dehydrogenase	5016	Bipolaris maydis	4577	Zea mays (related: maize)	Monocots	reduced virulence	134	3
Q48S75	PHI:2880	AspA	AgI/I I family adhesin protein	1314	Streptococcus pyogenes	10090	Mus musculus (related: house mouse)	Rodents	reduced virulence	1490	2
A0A024CIG8	PHI:2934	cifA	Nonribosomal peptide synthethase-encoding gene responsible for cichofactin biosynthesis	36746	Pseudomonas cichorii	4236	Lactuca sativa (related: garden lettuce)	Eudicots	reduced virulence	16232	6
Q87BQ4	PHI:2937	gumD	-	2371	Xylella fastidiosa	29760	Vitis vinifera (related: wine grape)	Eudicots	loss of pathogenicity	73842	67
G7TM01	PHI:2964	AsnB	Asparagine synthetase	347	Xanthomonas oryzae	4530	Oryza sativa (related: rice)	Monocots	reduced virulence	1154	11
Q54151	PHI:2980	pic	Auto -transporter protein	623	Shigella flexneri	10090	Mus musculus (related: house mouse)	Rodents	reduced virulence	2290	3
Q834U9	PHI:2998	EF1533	-	1351	Enterococcus faecalis	7137	Galleria mellonella (related: greater wax moth)	Moths	reduced virulence	1836	15
Q97NM0	PHI:3010	STM237	-	1313	Streptococcus pneumoniae	10090	Mus musculus (related: house mouse)	Rodents	reduced virulence	1100	6
Q0PRN7	PHI:3056	luxO	upstream negative regulator of smcR	672	Vibrio vulnificus	7067	Tenebrio molitor (related: yellow mealworm)	Beetles	increased virulence (hypervirulence)	400	2
J4UTE1	PHI:3068	BbAC	Adenylate cyclase	176275	Beauveria bassiana	7137	Galleria mellonella (related: greater wax moth)	Moths	reduced virulence	10	1
D0Z9U0	PHI:3074	hupA	Nucleoid-associated protein, is a basic DNA-binding protein involved in gene regulation	636	Edwardsiella tarda	7955	Danio rerio (related: zebrafish)	Bony fishes	reduced virulence	8420	10
H3RI38	PHI:3092	SoxR	activate gene expression in response to oxidative stress	66269	Pantoea stewartii	4577	Zea mays (related: maize)	Monocots	reduced virulence	42942	8
Q3BP62	PHI:3129	wxcB	The function of wxcBin the LPS biosynthesis cluster is related to the regulation of virulence, motility, biofilm formation, and SDS tolerance, but not LPS synthesis	339	Xanthomonas campestris	4081	Solanum lycopersicum (related: tomato)	Eudicots	reduced virulence	82	1
P67331	PHI:3154	spr0084	pathogenitcity related	1313	Streptococcus pneumoniae	10090	Mus musculus (related: house mouse)	Rodents	reduced virulence	34832	15
Q8DPY9	PHI:3156	spr0930	pathogenitcity related	1313	Streptococcus pneumoniae	10090	Mus musculus (related: house mouse)	Rodents	reduced virulence	4978	5
Q8RYB2	PHI:316;PHI:4606	PiGPB1	G beta protein subunit;PiGPB1 is important for sporangia formation	4787	Phytophthora infestans	4113	Solanum tuberosum (related: potato)	Eudicots	reduced virulence	4	1
Q8J2P6	PHI:317	RHBA	Nutrient signalling	746128	Aspergillus fumigatus	10090	Mus musculus (related: house mouse)	Rodents	reduced virulence	68	1
Q5GZM8	PHI:3219	fleQ	Flagellar motility	347	Xanthomonas oryzae	4530	Oryza sativa (related: rice)	Monocots	unaffected pathogenicity	71820	22
Q6ZX14	PHI:325	ACE1	Effector protein, polyketide synthase	318829	Magnaporthe oryzae	4530	Oryza sativa (related: rice)	Monocots	effector (plant avirulence determinant)	7732	1
Q8CWG4	PHI:3272	glpD	Glycerol-3-phosphate dehydrogenase involved in glycerol fermentation	632	Yersinia pestis	10090	Mus musculus (related: house mouse)	Rodents	unaffected pathogenicity	26496	4
E9E8J3	PHI:3263	MaSnf1	sucrose non-fermenting protein kinase	92637	Metarhizium acridum	7004	Locusta migratoria (related: migratory locust)	Grasshoppers	reduced virulence	262	1
Q8E473	PHI:3269	xf	Surface protein	1311	Streptococcus agalactiae	7955	Danio rerio (related: zebrafish)	Bony fishes	reduced virulence	584	3
Q4WC12	PHI:3276	fhpB	flavohemoglobins	746128	Aspergillus fumigatus	7137	Galleria mellonella (related: greater wax moth)	Moths	unaffected pathogenicity	3662	9
Q4W9X3	PHI:3275	fhpA	flavohemoglobins	746128	Aspergillus fumigatus	10090;7137	Mus musculus (related: house mouse);Galleria mellonella (related: greater wax moth)	Rodents;Moths	unaffected pathogenicity	1352	5
P0A9G2	PHI:3267	nhaR	Transcriptional activator protein	562	Escherichia coli	10090	Mus musculus (related: house mouse)	Rodents	reduced virulence	14908	7
Q4UQD0	PHI:3259	XC_3703	Cyclic di-GMP Effectors	339	Xanthomonas campestris	3726	Raphanus sativus (related: radish)	Eudicots	effector (plant avirulence determinant);reduced virulence	14686	7
P0A9G2	PHI:3267	nhaR	Transcriptional activator protein	562	Escherichia coli	10090	Mus musculus (related: house mouse)	Rodents	reduced virulence	14908	4
E9E8J3	PHI:3263	MaSnf1	sucrose non-fermenting protein kinase	92637	Metarhizium acridum	7004	Locusta migratoria (related: migratory locust)	Grasshoppers	reduced virulence	262	2
B8F3F8	PHI:3320	ompP2	involved in pathogenicity	738	Glaesserella parasuis	10090	Mus musculus (related: house mouse)	Rodents	reduced virulence	72	1
P13738	PHI:3266	nhaA	Antiporter gene	562	Escherichia coli	10090	Mus musculus (related: house mouse)	Rodents	reduced virulence	40152	35
Q4WC12	PHI:3276	fhpB	flavohemoglobins	746128	Aspergillus fumigatus	7137	Galleria mellonella (related: greater wax moth)	Moths	unaffected pathogenicity	3662	11
C4YGV6	PHI:3370	vph1	acidification of the vacuole	5476	Candida albicans	10090	Mus musculus (related: house mouse)	Rodents	reduced virulence	36	2
W7MS09	PHI:3385	FVEG_12529	fusaric acid biosynthesis	117187	Fusarium verticillioides	4577	Zea mays (related: maize)	Monocots	unaffected pathogenicity	38608	41
Q96VL3	PHI:339	CLPT1	GTPase	290576	Colletotrichum lindemuthianum	3885	Phaseolus vulgaris (related: kidney bean)	Eudicots	reduced virulence	468	8
B4EHQ6	PHI:3450	BCAM0224	Multifunctional Trimeric Autotransporter	95486	Burkholderia cenocepacia	9606	Homo sapiens (related: human)	Primates	reduced virulence	1770	9
J9VMW8	PHI:3457	PHO84	Phosphate Acquisition and Storage	5207	Cryptococcus neoformans	10090	Mus musculus (related: house mouse)	Rodents	reduced virulence	19292	2
P65607	PHI:3474	arcB	Part of the arginine deiminase system	1313	Streptococcus pneumoniae	10090	Mus musculus (related: house mouse)	Rodents	reduced virulence	10306	33
Q5XEA3	PHI:3487	AdcR	Adhesin competence repressor	1314	Streptococcus pyogenes	10090	Mus musculus (related: house mouse)	Rodents	reduced virulence	204	1
Q0P928	PHI:3519;PHI:9060	HtrA	serine protease;Secreted serine protease	197	Campylobacter jejuni	10090	Mus musculus (related: house mouse)	Rodents	unaffected pathogenicity;reduced virulence	502	1
A1YKW7	PHI:3596	RtxA	RTX Toxin	504	Kingella kingae	10114	Rattus (related: rat)	Rodents	reduced virulence	1918	4
O69730	PHI:3615	tcrX	Two-Component Regulatory Systems	1773	Mycobacterium tuberculosis	10090	Mus musculus (related: house mouse)	Rodents	increased virulence (hypervirulence)	19920	24
O69730	PHI:3615	tcrX	Two-Component Regulatory Systems	1773	Mycobacterium tuberculosis	10090	Mus musculus (related: house mouse)	Rodents	increased virulence (hypervirulence)	19920	6
P9WGL3	PHI:3618	kdpD	Two-Component Regulatory Systems	1773	Mycobacterium tuberculosis	10090	Mus musculus (related: house mouse)	Rodents	increased virulence (hypervirulence)	19868	13
P9WGL5	PHI:3621	Rv3220c	Two-Component Regulatory Systems	1773	Mycobacterium tuberculosis	10090	Mus musculus (related: house mouse)	Rodents	unaffected pathogenicity	4482	8
O06806	PHI:3631	Rv1773c	Transcriptional regulator (IclR family)	1773	Mycobacterium tuberculosis	10090	Mus musculus (related: house mouse)	Rodents	increased virulence (hypervirulence)	30	1
Q8YFS2	PHI:3646	bpdB	cyclic-di-GMP-specific phosphodiesterase	29459	Brucella melitensis	10090	Mus musculus (related: house mouse)	Rodents	reduced virulence	34378	14
A0A016PW58	PHI:3658	NPS2	peptide synthetase	5518	Fusarium graminearum	4565	Triticum aestivum (related: bread wheat)	Monocots	unaffected pathogenicity;reduced virulence	40	1
D0ZLQ7	PHI:3668;PHI:4693;PHI:4698;PHI:9435	MgtC;mgtC	Required for intramacrophage survival and growth in low Mg2+.;Virulence protein;cellulose synthesis regulation	28901	Salmonella enterica	10090	Mus musculus (related: house mouse)	Rodents	effector (plant avirulence determinant);reduced virulence;increased virulence (hypervirulence)	33222	33
Q4V037	PHI:3719	XC_0249	encodes a protein with a class III nucleotidyl cyclase domain, is required for cyclic GMP synthesis	339	Xanthomonas campestris	3726	Raphanus sativus (related: radish)	Eudicots	reduced virulence	310	4
Q58PK3	PHI:3821	SconCp	negative regulator of the inorganic sulfur assimilation pathway	121759	Paracoccidioides brasiliensis	10090	Mus musculus (related: house mouse)	Rodents	reduced virulence	172	2
G4MV96	PHI:3823	MET13	methylenetetrahydrofolate reductase	318829	Magnaporthe oryzae	4513;4530	Hordeum vulgare (related: barley);Oryza sativa (related: rice)	Monocots	loss of pathogenicity	66	1
Q6RXX2	PHI:384	SPE3-LYS9	Chimeric spermidine synthase/saccharopine dehydrogenase	5207	Cryptococcus neoformans	10090	Mus musculus (related: house mouse)	Rodents	loss of pathogenicity	1924	2
Q8CVF8	PHI:3877	FimH	type 1 adhesin	562	Escherichia coli	10090	Mus musculus (related: house mouse)	Rodents	reduced virulence	14426	2
Q4PIF8	PHI:3919	fer1	encoding an iron multicopper oxidase	5270	Ustilago maydis	4577	Zea mays (related: maize)	Monocots	reduced virulence	164	1
N1NKQ7	PHI:3922	FliZ	Global Regulatory Protein	628	Xenorhabdus nematophila	7109	Spodoptera littoralis (related: african cotton leafworm)	Moths	reduced virulence	1370	4
E8XCP9	PHI:3929	MacA	ABC-Type Efux Pump	28901	Salmonella enterica	10090	Mus musculus (related: house mouse)	Rodents	reduced virulence	53212	24
Q4UYV4	PHI:3946	XC_0690	Sugar kinase, adenosine kinase	339	Xanthomonas campestris	3726	Raphanus sativus (related: radish)	Eudicots	reduced virulence	68	1
Q4UZE1	PHI:3959	XC_0501	NADH pyrophosphatase	339	Xanthomonas campestris	3726	Raphanus sativus (related: radish)	Eudicots	reduced virulence	25524	2
Q4UYZ7	PHI:3963	XC_0646	Carboxyltransferase	339	Xanthomonas campestris	3726	Raphanus sativus (related: radish)	Eudicots	reduced virulence	2518	5
G4MMK2	PHI:3975	MoIlv2	Acetolactate synthases	318829	Magnaporthe oryzae	4513;4530	Hordeum vulgare (related: barley);Oryza sativa (related: rice)	Monocots	loss of pathogenicity	85418	11
Q0PZG3	PHI:3978	vasH	T6SS effector	644	Aeromonas hydrophila	10090	Mus musculus (related: house mouse)	Rodents	effector (plant avirulence determinant)	46	2
B2ZAW3	PHI:3989	cpkk3	activated during high osmolarity response	5116	Cryphonectria parasitica	134033	Castanea dentata (related: american chestnut)	Eudicots	unaffected pathogenicity	2	1
B2C317	PHI:4007;PHI:6948	flaA	Flagellin;-	446	Legionella pneumophila	10090	Mus musculus (related: house mouse)	Rodents	unaffected pathogenicity	1602	10
O13401	PHI:401	SOD2	Manganese superoxide dismutase	5476	Candida albicans	10090	Mus musculus (related: house mouse)	Rodents	unaffected pathogenicity	1006	1
P13738	PHI:3266	nhaA	Antiporter gene	562	Escherichia coli	10090	Mus musculus (related: house mouse)	Rodents	reduced virulence	40152	17
H3RJF6	PHI:3296	iucA	siderophore-mediated iron acquisition	66269	Pantoea stewartii	4577	Zea mays (related: maize)	Monocots	reduced virulence	3022	3
Q882L6	PHI:3350	bifA	c-di-GMP phosphodiesterase	317	Pseudomonas syringae	4081	Solanum lycopersicum (related: tomato)	Eudicots	reduced virulence	930	9
B2HHI1	PHI:3364	MMAR_1663	locus required for ESX-1 export	1781	Mycobacterium marinum	5755	Acanthamoeba castellanii (no common name found)	Eukaryotes	reduced virulence	4522	1
Q9HV74	PHI:3440	CbrA	Sensor Kinase	287	Pseudomonas aeruginosa	44689;10090;10114	Dictyostelium discoideum (related: amoeba);Mus musculus (related: house mouse);Rattus (related: rat)	Cellular slime molds;Rodents	unaffected pathogenicity;reduced virulence	29920	3
Q833J1	PHI:3441	tcpF	encodes a protein resembling mammalian and bacterial TIR proteins	1351	Enterococcus faecalis	10090	Mus musculus (related: house mouse)	Rodents	unaffected pathogenicity	2058	1
Q81Z68	PHI:3446	yceH	Tellurite Resistance	1392	Bacillus anthracis	10090	Mus musculus (related: house mouse)	Rodents	reduced virulence	5754	2
A1ABF3	PHI:3466	RstA	Part of a two component regulatory system	562	Escherichia coli	9031	Gallus gallus (related: chicken)	Birds	reduced virulence	15452	2
Q97NA4	PHI:3473	arcA	Part of the arginine deiminase system	1313	Streptococcus pneumoniae	10090	Mus musculus (related: house mouse)	Rodents	reduced virulence	710	4
Q97NA0	PHI:3477	arcT	Part of the arginine deiminase system	1313	Streptococcus pneumoniae	10090	Mus musculus (related: house mouse)	Rodents	reduced virulence	36266	20
Q54970	PHI:3604	spxB	Pyruvate Oxidase Gene	1313	Streptococcus pneumoniae	10090	Mus musculus (related: house mouse)	Rodents	increased virulence (hypervirulence)	23410	12
P9WGN1	PHI:3619	kdpE	Two-Component Regulatory Systems	1773	Mycobacterium tuberculosis	10090	Mus musculus (related: house mouse)	Rodents	increased virulence (hypervirulence)	3152	18
O05895	PHI:3637	alkB (Rv3252c)	transmembrane alkane-1-monooxygenase	1773	Mycobacterium tuberculosis	10090	Mus musculus (related: house mouse)	Rodents	increased virulence (hypervirulence)	658	2
Q87AN1	PHI:3666	HxfB (PD_1792) (pspA)	Hemagglutinin adhesin, secreted protein	2371	Xylella fastidiosa	29760	Vitis vinifera (related: wine grape)	Eudicots	increased virulence (hypervirulence)	1360	1
D4HX89	PHI:3675;PHI:3681	yfiA	-	552	Erwinia amylovora	23211	Pyrus communis (related: pear)	Eudicots	unaffected pathogenicity	9534	2
P0A3S3	PHI:3705	endA	Membrane surface localized endonuclease	1313	Streptococcus pneumoniae	10090	Mus musculus (related: house mouse)	Rodents	reduced virulence	968	5
C6DB00	PHI:3710	tolC	Outer membrane channel protein	554	Pectobacterium carotovorum	3711	Brassica rapa (related: field mustard)	Eudicots	reduced virulence	884	1
J9WML2	PHI:3721	Pdpg2	pH signaling transcription factor	36651	Penicillium digitatum	55188	Citrus unshiu (related: satsuma mandarin)	Eudicots	reduced virulence	194	1
D0ZHS9	PHI:3760	spvB	Secreted effector protein	28901	Salmonella enterica	10090	Mus musculus (related: house mouse)	Rodents	effector (plant avirulence determinant)	5480	7
D0ZX10	PHI:3780	sssB	Secreted effector protein	28901	Salmonella enterica	10090	Mus musculus (related: house mouse)	Rodents	effector (plant avirulence determinant)	18652	3
Q6FM27	PHI:3793	ANP1	encode alpha -(1-6)-mannosyl-transferases	5478	Candida glabrata	10090	Mus musculus (related: house mouse)	Rodents	increased virulence (hypervirulence)	29292	20
V6RR76	PHI:3831	Fgrac1	Rho GTPases	5518	Fusarium graminearum	4565	Triticum aestivum (related: bread wheat)	Monocots	reduced virulence	32	1
Q6D930	PHI:3840	rcpA	Regulation of the Flp/Tad Pilus	29471	Pectobacterium atrosepticum	4113	Solanum tuberosum (related: potato)	Eudicots	reduced virulence	4402	3
Q04LP0	PHI:3899	PrtA	serine protease	1313	Streptococcus pneumoniae	10090	Mus musculus (related: house mouse)	Rodents	unaffected pathogenicity	16	1
Q4UQL6	PHI:3957	XC_3615	Electron transfer flavoprotein alpha subunit	339	Xanthomonas campestris	3726	Raphanus sativus (related: radish)	Eudicots	reduced virulence	35990	1
Q4UZ72	PHI:3961	XC_0570	Iron utilisation protein	339	Xanthomonas campestris	3726	Raphanus sativus (related: radish)	Eudicots	reduced virulence	4488	1
Q830T5	PHI:4012	ElrR	Rgg-Like Regulator	1351	Enterococcus faecalis	10090	Mus musculus (related: house mouse)	Rodents	reduced virulence	2742	1
G4N740	PHI:4024	MoST1	hexose transporter-like protein	318829	Magnaporthe oryzae	4513;4530	Hordeum vulgare (related: barley);Oryza sativa (related: rice)	Monocots	unaffected pathogenicity	436	2
W2E906	PHI:3274	dhbF	Siderophore Bacillibactin	1464	Paenibacillus larvae	7460	Apis mellifera (related: honey bee)	Bees	unaffected pathogenicity	3534	5
Q4USX3	PHI:3260	XC_2801	transcription regulator	339	Xanthomonas campestris	3726	Raphanus sativus (related: radish)	Eudicots	reduced virulence	91412	52
Q4WIQ3	PHI:3277	gnoA	S-nitrosoglutathione reductase	746128	Aspergillus fumigatus	10090	Mus musculus (related: house mouse)	Rodents	unaffected pathogenicity	4334	6
Q4USX3	PHI:3260	XC_2801	transcription regulator	339	Xanthomonas campestris	3726	Raphanus sativus (related: radish)	Eudicots	reduced virulence	91412	9
Q02N79	PHI:3290	pqsH	Quorum sensing system to regulate several genes required for its survival and pathogenicity within the host.	287	Pseudomonas aeruginosa	10090	Mus musculus (related: house mouse)	Rodents	reduced virulence	4500	1
Q5AJB1	PHI:3321	Tfp1	putative subunit of V-ATPase	5476	Candida albicans	10090	Mus musculus (related: house mouse)	Rodents	loss of pathogenicity	22080	41
C4YGV6	PHI:3370	vph1	acidification of the vacuole	5476	Candida albicans	10090	Mus musculus (related: house mouse)	Rodents	reduced virulence	36	1
Q6X269	PHI:338	CLB2	B-type Cyclin	5270	Ustilago maydis	4577	Zea mays (related: maize)	Monocots	reduced virulence	94	1
W7MS01	PHI:3389	FVEG_12521	fusaric acid biosynthesis	117187	Fusarium verticillioides	4577	Zea mays (related: maize)	Monocots	unaffected pathogenicity	54786	1
Q1J7H9	PHI:3436	sagB	Streptolysin S biosynthesis protein	1314	Streptococcus pyogenes	10090	Mus musculus (related: house mouse)	Rodents	unaffected pathogenicity	28	1
Q8X965	PHI:3472	TolA	Periplasm spanning protein	562	Escherichia coli	7137	Galleria mellonella (related: greater wax moth)	Moths	reduced virulence	16548	5
Q97NA2	PHI:3475	arcC	Part of the arginine deiminase system	1313	Streptococcus pneumoniae	10090	Mus musculus (related: house mouse)	Rodents	reduced virulence	88588	23
Q5XEA3	PHI:3487	AdcR	Adhesin competence repressor	1314	Streptococcus pyogenes	10090	Mus musculus (related: house mouse)	Rodents	reduced virulence	204	2
Q6KD45	PHI:3610	iucD	aerobactin	562	Escherichia coli	9031	Gallus gallus (related: chicken)	Birds	reduced virulence	3418	2
P9WGL5	PHI:3621	Rv3220c	Two-Component Regulatory Systems	1773	Mycobacterium tuberculosis	10090	Mus musculus (related: house mouse)	Rodents	unaffected pathogenicity	4482	2
Q8YFS2	PHI:3646	bpdB	cyclic-di-GMP-specific phosphodiesterase	29459	Brucella melitensis	10090	Mus musculus (related: house mouse)	Rodents	reduced virulence	34378	5
Q5J4D6	PHI:365;PHI:2267	Mls1;MLS1	Malate synthase	13684	Parastagonospora nodorum	4564	Triticum (related: wheat)	Monocots	loss of pathogenicity	776	3
Q87ET0	PHI:3662	PspB (PD_0218)	Serine protease, PspB	2371	Xylella fastidiosa	29760	Vitis vinifera (related: wine grape)	Eudicots	increased virulence (hypervirulence)	764	3
Q5AD21	PHI:3689	Pot13p	3-ketoacyl-CoA thiolases	5476	Candida albicans	9031	Gallus gallus (related: chicken)	Birds	unaffected pathogenicity	40582	29
J7KWB2	PHI:3709	qseC	Sensor protein QseC bacterial adrenergic receptor	554	Pectobacterium carotovorum	3711	Brassica rapa (related: field mustard)	Eudicots	reduced virulence	4270	2
D0ZRB2	PHI:3743	slrP	Secreted effector protein	28901	Salmonella enterica	10090	Mus musculus (related: house mouse)	Rodents	effector (plant avirulence determinant)	1104	1
Q8NKF8	PHI:376	SCH9	Protein Kinase	5207	Cryptococcus neoformans	9986;10090	Oryctolagus cuniculus (related: rabbit);Mus musculus (related: house mouse)	Rabbits & hares;Rodents	reduced virulence	22	1
Q9ZI86	PHI:3782	PA3984	acyltransferases	287	Pseudomonas aeruginosa	7067	Tenebrio molitor (related: yellow mealworm)	Beetles	reduced virulence	21658	1
Q9HYZ8	PHI:3787	PA3242	acyltransferases	287	Pseudomonas aeruginosa	7067	Tenebrio molitor (related: yellow mealworm)	Beetles	increased virulence (hypervirulence)	18690	6
A7FN30	PHI:3847	tcpYI	homology to members of the Toll/IL-1 receptor family	633	Yersinia pseudotuberculosis	10090	Mus musculus (related: house mouse)	Rodents	reduced virulence	20	1
B2W4L0	PHI:3859	GLU1	glucanase gene	45151	Pyrenophora tritici-repentis	4565	Triticum aestivum (related: bread wheat)	Monocots	reduced virulence	102	2
Q96VU5	PHI:387	UGD1	UDP-glucose dehydrogenase	5207	Cryptococcus neoformans	10090	Mus musculus (related: house mouse)	Rodents	loss of pathogenicity	53976	51
Q8ZLT3	PHI:3878	pnp	polynucleotide phosphorylase, an exoribonuclease involved in RNA processing and degradation	28901	Salmonella enterica	9823	Sus scrofa (related: pig)	Even-toed ungulates	reduced virulence	115516	45
B2SR06	PHI:3895	PXO_01122	PDZ domain-containing proteases	347	Xanthomonas oryzae	4530	Oryza sativa (related: rice)	Monocots	reduced virulence	31290	25
Q8ZQE4	PHI:3928	MacB	ABC-Type Efux Pump	28901	Salmonella enterica	10090	Mus musculus (related: house mouse)	Rodents	reduced virulence	210316	189
Q4UZG1	PHI:3941	XC_0481	Anthranilate synthase component II	339	Xanthomonas campestris	3726	Raphanus sativus (related: radish)	Eudicots	reduced virulence	30130	13
Q4V006	PHI:3947	XC_0281	Oxidoreductase	339	Xanthomonas campestris	3726	Raphanus sativus (related: radish)	Eudicots	reduced virulence	26096	24
Q4UZJ1	PHI:3948	XC_0450	4-Hydroxyphenylpyruvate deoxygenase	339	Xanthomonas campestris	3726	Raphanus sativus (related: radish)	Eudicots	reduced virulence	350	5
Q65YU2	PHI:395	FGA2	G alpha protein subunit	5507	Fusarium oxysporum	4081	Solanum lycopersicum (related: tomato)	Eudicots	loss of pathogenicity	10	1
Q4UWY6	PHI:3951	XC_1368	Osmotically inducible protein, oxidative stress resistance	339	Xanthomonas campestris	3726	Raphanus sativus (related: radish)	Eudicots	reduced virulence	8022	1
P79068	PHI:40	PKS1	Polyketide synthase	5462	Colletotrichum lagenaria	3659	Cucumis sativus (related: cucumber)	Eudicots	reduced virulence	12	1
A6QFU3	PHI:4037	cydB	Terminal Oxidases	1280	Staphylococcus aureus	10090	Mus musculus (related: house mouse)	Rodents	reduced virulence	3956	2
A0A097IB07	PHI:3281;PHI:4819	AS87_04050	Vi polysaccharide biosynthesis protein VipB/TviC;Lipopolysaccharide Biosynthesis and Pathogenicity	34085	Riemerella anatipestifer	8839	Anas platyrhynchos (related: mallard)	Birds	reduced virulence	26360	32
Q4USG7	PHI:3282	NagZ	b-lactamase induction	339	Xanthomonas campestris	3712	Brassica oleracea (no common name found)	Eudicots	reduced virulence	43522	21
Q6GFE2	PHI:3285	saNOS	NO-synthase	1280	Staphylococcus aureus	10090	Mus musculus (related: house mouse)	Rodents	reduced virulence	4744	5
H3RJF6	PHI:3296	iucA	siderophore-mediated iron acquisition	66269	Pantoea stewartii	4577	Zea mays (related: maize)	Monocots	reduced virulence	3022	3
A0A075TRB3	PHI:3301	patN	Production of Patulin	27334	Penicillium expansum	3750	Malus domestica (related: apple)	Eudicots	unaffected pathogenicity	390	4
B8F4W8	PHI:3317	hsdR	involved in pathogenicity	738	Glaesserella parasuis	10090	Mus musculus (related: house mouse)	Rodents	reduced virulence	17270	22
B8F4W8	PHI:3317	hsdR	involved in pathogenicity	738	Glaesserella parasuis	10090	Mus musculus (related: house mouse)	Rodents	reduced virulence	17270	43
I1S028	PHI:3374	FgSln1	fungal development and pathogenicity	5518	Fusarium graminearum	4565	Triticum aestivum (related: bread wheat)	Monocots	reduced virulence	5978	1
D2TV46	PHI:3449	crc1	Class 1 Serine Protease Autotransporter	67825	Citrobacter rodentium	10090	Mus musculus (related: house mouse)	Rodents	increased virulence (hypervirulence)	544	3
J9VMW8	PHI:3457	PHO84	Phosphate Acquisition and Storage	5207	Cryptococcus neoformans	10090	Mus musculus (related: house mouse)	Rodents	reduced virulence	19292	4
Q8X965	PHI:3472	TolA	Periplasm spanning protein	562	Escherichia coli	7137	Galleria mellonella (related: greater wax moth)	Moths	reduced virulence	16548	13
Q9KSD8	PHI:3482	VprA	response regulator	666	Vibrio cholerae	10090	Mus musculus (related: house mouse)	Rodents	reduced virulence	638	4
G7RUY1	PHI:3531	pld1	Lipid metabolism	573	Klebsiella pneumoniae	10090	Mus musculus (related: house mouse)	Rodents	loss of pathogenicity	322	1
Q6SSJ3	PHI:358	ILV2	Acetolactate synthase	5207	Cryptococcus neoformans	10090	Mus musculus (related: house mouse)	Rodents	loss of pathogenicity	26960	12
A1YKW7	PHI:3596	RtxA	RTX Toxin	504	Kingella kingae	10114	Rattus (related: rat)	Rodents	reduced virulence	1918	1
Q5K995	PHI:360	KIN1	Serine/threonine protein kinase;-	5207	Cryptococcus neoformans	10090;6239	Mus musculus (related: house mouse);Caenorhabditis elegans (related: roundworm)	Rodents;Nematodes	reduced virulence	180	3
P9WG11	PHI:3635	Rv0930	PstA component of phosphate uptake	1773	Mycobacterium tuberculosis	10090	Mus musculus (related: house mouse)	Rodents	unaffected pathogenicity	51586	46
D4HX89	PHI:3675;PHI:3681	yfiA	-	552	Erwinia amylovora	23211	Pyrus communis (related: pear)	Eudicots	unaffected pathogenicity	9534	4
Q5AJ90	PHI:3688	Fox3p	3-ketoacyl-CoA thiolases	5476	Candida albicans	9031	Gallus gallus (related: chicken)	Birds	unaffected pathogenicity	1626	5
P0A3S3	PHI:3705	endA	Membrane surface localized endonuclease	1313	Streptococcus pneumoniae	10090	Mus musculus (related: house mouse)	Rodents	reduced virulence	968	5
C6DB00	PHI:3710	tolC	Outer membrane channel protein	554	Pectobacterium carotovorum	3711	Brassica rapa (related: field mustard)	Eudicots	reduced virulence	884	7
E8X960	PHI:3727	WzzfepE	Ferric enterobactin transport protein FepE	28901	Salmonella enterica	7137	Galleria mellonella (related: greater wax moth)	Moths	loss of pathogenicity	3876	1
G4MUX6	PHI:3816	GSN1	Glycogen synthase	318829	Magnaporthe oryzae	4513;4530	Hordeum vulgare (related: barley);Oryza sativa (related: rice)	Monocots	reduced virulence	8738	1
P0A3X0	PHI:3819	ymoA	represses the transcription and expression of T3SS genes at room temperature	632	Yersinia pestis	10090	Mus musculus (related: house mouse)	Rodents	increased virulence (hypervirulence)	3462	1
G4MV96	PHI:3823	MET13	methylenetetrahydrofolate reductase	318829	Magnaporthe oryzae	4513;4530	Hordeum vulgare (related: barley);Oryza sativa (related: rice)	Monocots	loss of pathogenicity	66	1
Q4P5N0	PHI:382;PHI:2233	Smu1;SMU1	Serine/threonine kinase;putative protein-arginine methyltransferases	5270	Ustilago maydis	4577	Zea mays (related: maize)	Monocots	reduced virulence	46	1
Q8CVF8	PHI:3877	FimH	type 1 adhesin	562	Escherichia coli	10090	Mus musculus (related: house mouse)	Rodents	reduced virulence	14426	3
Q4WRQ8	PHI:3904	AGS3	controlling the biosynthesis of a-(1,3)-glucan	746128	Aspergillus fumigatus	10090	Mus musculus (related: house mouse)	Rodents	reduced virulence	48	1
Q04LM7	PHI:3911	Etrx1	surface -exposed thioredoxin-family lipoprotein	1313	Streptococcus pneumoniae	10090	Mus musculus (related: house mouse)	Rodents	unaffected pathogenicity	19300	4
Q4UWY6	PHI:3951	XC_1368	Osmotically inducible protein, oxidative stress resistance	339	Xanthomonas campestris	3726	Raphanus sativus (related: radish)	Eudicots	reduced virulence	8022	6
Q4URJ2	PHI:3954	XC_3287	Phosphoglycerate mutase	339	Xanthomonas campestris	3726	Raphanus sativus (related: radish)	Eudicots	reduced virulence	4328	7
Q4UZL6	PHI:3958	XC_0423	Maltooligosyltrehalose trehalohydrolase	339	Xanthomonas campestris	3726	Raphanus sativus (related: radish)	Eudicots	reduced virulence	128	1
G4MMK2	PHI:3975	MoIlv2	Acetolactate synthases	318829	Magnaporthe oryzae	4513;4530	Hordeum vulgare (related: barley);Oryza sativa (related: rice)	Monocots	loss of pathogenicity	85418	32
Q0PZG0	PHI:3979	vasK	T6SS effector	644	Aeromonas hydrophila	10090	Mus musculus (related: house mouse)	Rodents	effector (plant avirulence determinant)	14636	7
I1RD96	PHI:3984	FGSG_01588 (Sc gpi7)	Glycosylphosphatidylinositol-Anchored Proteins	5518	Fusarium graminearum	4565	Triticum aestivum (related: bread wheat)	Monocots	unaffected pathogenicity	2930	2
O13401	PHI:401	SOD2	Manganese superoxide dismutase	5476	Candida albicans	10090	Mus musculus (related: house mouse)	Rodents	unaffected pathogenicity	1006	5
N4V0R3	PHI:3278	CoIra1	Ras GTPase Activating Protein	5465	Colletotrichum orbiculare	3659	Cucumis sativus (related: cucumber)	Eudicots	reduced virulence	4	1
N4VQQ5	PHI:3280	CoRAS1	Ras genes	5465	Colletotrichum orbiculare	3659	Cucumis sativus (related: cucumber)	Eudicots	lethal	226	8
H3RJF2	PHI:3297	iutA	siderophore-mediated iron acquisition	66269	Pantoea stewartii	4577	Zea mays (related: maize)	Monocots	reduced virulence	11586	1
Q5AJB1	PHI:3321	Tfp1	putative subunit of V-ATPase	5476	Candida albicans	10090	Mus musculus (related: house mouse)	Rodents	loss of pathogenicity	22080	10
I6Y0L1	PHI:3351	mbtE	mycobactin biosynthesis	1773	Mycobacterium tuberculosis	10141	Cavia porcellus (related: domestic guinea pig)	Rodents	reduced virulence	116	4
Q9F286	PHI:3404	yapG	Proteolytic processing	632	Yersinia pestis	10090	Mus musculus (related: house mouse)	Rodents	unaffected pathogenicity	24242	3
Q5DPX0	PHI:3418	ssp	Lipase activity	29385	Staphylococcus saprophyticus	6239	Caenorhabditis elegans (related: roundworm)	Nematodes	reduced virulence	360	1
B5Y383	PHI:3448	pgaC	Production of poly-b-linkedN-acetylglucosamine	573	Klebsiella pneumoniae	10090	Mus musculus (related: house mouse)	Rodents	reduced virulence	34140	45
B4EHQ6	PHI:3450	BCAM0224	Multifunctional Trimeric Autotransporter	95486	Burkholderia cenocepacia	9606	Homo sapiens (related: human)	Primates	reduced virulence	1770	3
P20582	PHI:3522	pqsD	Required for the synthesis of the Pseudomonas quinolone signal, a quorum sensing signal molecule that contributes to slow killing and the red death phenotype in C. Elegans.	287	Pseudomonas aeruginosa	6239	Caenorhabditis elegans (related: roundworm)	Nematodes	reduced virulence	6070	10
B4E5A2	PHI:3524	paaA	phenylacetic acid catabolism	95486	Burkholderia cenocepacia	6239	Caenorhabditis elegans (related: roundworm)	Nematodes	reduced virulence	14714	2
P9WMF9	PHI:3614	dosR (devR);devR	Two-Component Regulatory Systems	1773	Mycobacterium tuberculosis	10090	Mus musculus (related: house mouse)	Rodents	increased virulence (hypervirulence)	2620	1
P9WI71	PHI:3624	pknH	serine/threonine kinase	1773	Mycobacterium tuberculosis	10090	Mus musculus (related: house mouse)	Rodents	increased virulence (hypervirulence)	60	1
O05877	PHI:3634	Rv3232c	Unknown, possible transcriptional regulator	1773	Mycobacterium tuberculosis	10090	Mus musculus (related: house mouse)	Rodents	reduced virulence	5238	3
Q8YFK0	PHI:3647;PHI:7185	cgsB	Low cyclic-di-GMP guanylate cyclase;cyclic-di-GMP-specific phosphodiesterase	29459	Brucella melitensis	10090	Mus musculus (related: house mouse)	Rodents	reduced virulence;increased virulence (hypervirulence)	22	1
D4HUY4	PHI:3674;PHI:3680	yhbH	a novel ribosome-associated modulation protein	552	Erwinia amylovora	23211	Pyrus communis (related: pear)	Eudicots	loss of pathogenicity	12816	14
Q5AJ90	PHI:3688	Fox3p	3-ketoacyl-CoA thiolases	5476	Candida albicans	9031	Gallus gallus (related: chicken)	Birds	unaffected pathogenicity	1626	6
Q8RYB4	PHI:369	PiGPA1	G alpha protein subunit	4787	Phytophthora infestans	4113	Solanum tuberosum (related: potato)	Eudicots	reduced virulence	2	1
Q8NIK9	PHI:370	PKA2	Cyclic AMP dependent protein kinase	5207	Cryptococcus neoformans	10090	Mus musculus (related: house mouse)	Rodents	reduced virulence	52	2
Q9I0U7	PHI:3783	PA2537	acyltransferases	287	Pseudomonas aeruginosa	7067	Tenebrio molitor (related: yellow mealworm)	Beetles	reduced virulence	6576	3
Q58PK3	PHI:3821	SconCp	negative regulator of the inorganic sulfur assimilation pathway	121759	Paracoccidioides brasiliensis	10090	Mus musculus (related: house mouse)	Rodents	reduced virulence	172	5
Q6RXX2	PHI:384	SPE3-LYS9	Chimeric spermidine synthase/saccharopine dehydrogenase	5207	Cryptococcus neoformans	10090	Mus musculus (related: house mouse)	Rodents	loss of pathogenicity	1924	6
P64825	PHI:3873	dgc	degradation of the ubiquitous bacterial second messenger, cyclic di-GMP	1773	Mycobacterium tuberculosis	10090	Mus musculus (related: house mouse)	Rodents	unaffected pathogenicity	2718	11
B2SR06	PHI:3895	PXO_01122	PDZ domain-containing proteases	347	Xanthomonas oryzae	4530	Oryza sativa (related: rice)	Monocots	reduced virulence	31290	6
Q04LM6	PHI:3913	SpMsrAB2	methionine sulfoxide reductase	1313	Streptococcus pneumoniae	10090	Mus musculus (related: house mouse)	Rodents	reduced virulence	16208	18
Q4UZD3	PHI:3942	XC_0509	Phosphoribosylamine-glycine ligase	339	Xanthomonas campestris	3726	Raphanus sativus (related: radish)	Eudicots	reduced virulence	30132	39
Q4UR27	PHI:3956	XC_3452	Two-component regulatory protein	339	Xanthomonas campestris	3726	Raphanus sativus (related: radish)	Eudicots	reduced virulence	36	3
L2FHG9	PHI:3972	CDA	Chitin deacetylase	474922	Colletotrichum gloeosporioides	3435	Persea americana (related: avocado)	Flowering plants	unaffected pathogenicity	1540	1
Q8CWG4	PHI:3272	glpD	Glycerol-3-phosphate dehydrogenase involved in glycerol fermentation	632	Yersinia pestis	10090	Mus musculus (related: house mouse)	Rodents	unaffected pathogenicity	26496	29
N4UYN1	PHI:3279	CoRAS2	Ras genes	5465	Colletotrichum orbiculare	3659	Cucumis sativus (related: cucumber)	Eudicots	reduced virulence	30	1
Q8P471	PHI:3283	ampG	b-lactamase induction	339	Xanthomonas campestris	3712	Brassica oleracea (no common name found)	Eudicots	increased virulence (hypervirulence)	500	2
H3RJF2	PHI:3297	iutA	siderophore-mediated iron acquisition	66269	Pantoea stewartii	4577	Zea mays (related: maize)	Monocots	reduced virulence	11586	5
A0A023NA98	PHI:3354	rtxA1	Production of MARTX toxin	672	Vibrio vulnificus	10090	Mus musculus (related: house mouse)	Rodents	reduced virulence	2714	10
Q5DPX0	PHI:3418	ssp	Lipase activity	29385	Staphylococcus saprophyticus	6239	Caenorhabditis elegans (related: roundworm)	Nematodes	reduced virulence	360	3
Q81Z69	PHI:3445	yceG	Tellurite Resistance	1392	Bacillus anthracis	10090	Mus musculus (related: house mouse)	Rodents	reduced virulence	20	1
Q6SSJ3	PHI:358	ILV2	Acetolactate synthase	5207	Cryptococcus neoformans	10090	Mus musculus (related: house mouse)	Rodents	loss of pathogenicity	26960	38
G3K6I0	PHI:3592	rpfC	encoding the histidine sensor kinase of the two-component system RfpC/RpfG	56454	Xanthomonas hortorum	4031	Pelargonium x hortorum (related: zonal pelargonium)	Eudicots	reduced virulence	5890	1
Q83CA1	PHI:3599	PmrA	Response Regulator	777	Coxiella burnetii	9534;9606	Chlorocebus aethiops (related: grivet);Homo sapiens (related: human)	Primates	reduced virulence	8462	18
O05853	PHI:3628	Rv3213c	Possible role in chromosome segregation	1773	Mycobacterium tuberculosis	10090	Mus musculus (related: house mouse)	Rodents	increased virulence (hypervirulence)	36668	14
Q6MX39	PHI:3633	UmaA1	Unknown mycolic acid methyltransferase	1773	Mycobacterium tuberculosis	10090	Mus musculus (related: house mouse)	Rodents	increased virulence (hypervirulence)	2534	9
Q8YFR7	PHI:3645;PHI:7184	bpdA	cyclic-di-GMP-specific phosphodiesterase;Phosphodiesterase	29459	Brucella melitensis	10090	Mus musculus (related: house mouse)	Rodents	reduced virulence;loss of pathogenicity	710	5
D4I0C5	PHI:3676;PHI:3682	rmf3	-	552	Erwinia amylovora	23211	Pyrus communis (related: pear)	Eudicots	unaffected pathogenicity	834	2
Q56056	PHI:3724	RNase III	endoribonucleases	28901	Salmonella enterica	7137	Galleria mellonella (related: greater wax moth)	Moths	reduced virulence	13628	7
D0ZLQ3	PHI:3751	cigR	Anti virulence factor	28901	Salmonella enterica	10090	Mus musculus (related: house mouse)	Rodents	increased virulence (hypervirulence)	2662	4
J9VQQ3	PHI:3801	Pmc1	putative vacuolar calcium ATPase	5207	Cryptococcus neoformans	10090	Mus musculus (related: house mouse)	Rodents	reduced virulence	108	3
G4N1E0	PHI:3809	TRA1	transcription factor	318829	Magnaporthe oryzae	4513;4530	Hordeum vulgare (related: barley);Oryza sativa (related: rice)	Monocots	reduced virulence	112	2
V6RR76	PHI:3831	Fgrac1	Rho GTPases	5518	Fusarium graminearum	4565	Triticum aestivum (related: bread wheat)	Monocots	reduced virulence	32	2
N4XMB0	PHI:3837	Sre1	iron-sensitive transcription factor	5016	Bipolaris maydis	4577	Zea mays (related: maize)	Monocots	reduced virulence	60	1
Q04HU1	PHI:3898	HtrA	serine protease	1313	Streptococcus pneumoniae	10090	Mus musculus (related: house mouse)	Rodents	reduced virulence	10042	24
Q9EYH7	PHI:3905	CNFy	cytotoxic necrotizing factor	633	Yersinia pseudotuberculosis	10090	Mus musculus (related: house mouse)	Rodents	loss of pathogenicity	122	1
I1S2J9	PHI:3924;PHI:8224;PHI:9036	Fg10995;FgABC1;fgm5 (FGSG_10995)	ATP-binding cassette (ABC) transporter;ABC Transporter;ABC transporter	5518	Fusarium graminearum	4565	Triticum aestivum (related: bread wheat)	Monocots	reduced virulence	3212	1
E8XCP9	PHI:3929	MacA	ABC-Type Efux Pump	28901	Salmonella enterica	10090	Mus musculus (related: house mouse)	Rodents	reduced virulence	53212	7
Q4UUL4	PHI:3945	XC_2203	Nucleotide diphosphate kinase	339	Xanthomonas campestris	3726	Raphanus sativus (related: radish)	Eudicots	reduced virulence	9834	4
Q4URJ2	PHI:3954	XC_3287	Phosphoglycerate mutase	339	Xanthomonas campestris	3726	Raphanus sativus (related: radish)	Eudicots	reduced virulence	4328	3
Q4UZA5	PHI:3960	XC_0537	ATP-dependant DNA helicase	339	Xanthomonas campestris	3726	Raphanus sativus (related: radish)	Eudicots	reduced virulence	16180	5
G4NC97	PHI:3976	MoIlv6	Acetolactate synthases	318829	Magnaporthe oryzae	4513;4530	Hordeum vulgare (related: barley);Oryza sativa (related: rice)	Monocots	loss of pathogenicity	3002	6
Q99YP4	PHI:3981	RocA	metabolic regulator with activity beyond the CovR/S regulon	36470	Streptococcus sp. 'group a'	10090	Mus musculus (related: house mouse)	Rodents	increased virulence (hypervirulence)	896	1
I1RD96	PHI:3984	FGSG_01588 (Sc gpi7)	Glycosylphosphatidylinositol-Anchored Proteins	5518	Fusarium graminearum	4565	Triticum aestivum (related: bread wheat)	Monocots	unaffected pathogenicity	2930	1
Q830T5	PHI:4012	ElrR	Rgg-Like Regulator	1351	Enterococcus faecalis	10090	Mus musculus (related: house mouse)	Rodents	reduced virulence	2742	1
E4TAS8	PHI:4026	sip	siderophore-i nteracting protein	34085	Riemerella anatipestifer	8839	Anas platyrhynchos (related: mallard)	Birds	reduced virulence	1298	1
Q8E473	PHI:3269	xf	Surface protein	1311	Streptococcus agalactiae	7955	Danio rerio (related: zebrafish)	Bony fishes	reduced virulence	584	1
B8F4F0	PHI:3319	gpT	involved in pathogenicity	738	Glaesserella parasuis	10090	Mus musculus (related: house mouse)	Rodents	reduced virulence	6456	8
Q0V687	PHI:3324	SN477	synthesis of (R)-mellein	13684	Parastagonospora nodorum	4565	Triticum aestivum (related: bread wheat)	Monocots	unaffected pathogenicity	92	2
Q6XSF5	PHI:334	CGB1	G beta protein subunit	5016	Bipolaris maydis	4577	Zea mays (related: maize)	Monocots	loss of pathogenicity	106	2
A0A023NA98	PHI:3354	rtxA1	Production of MARTX toxin	672	Vibrio vulnificus	10090	Mus musculus (related: house mouse)	Rodents	reduced virulence	2714	14
W7N2A8	PHI:3383	FVEG_12531	fusaric acid biosynthesis	117187	Fusarium verticillioides	4577	Zea mays (related: maize)	Monocots	unaffected pathogenicity	19690	7
W7MS09	PHI:3385	FVEG_12529	fusaric acid biosynthesis	117187	Fusarium verticillioides	4577	Zea mays (related: maize)	Monocots	unaffected pathogenicity	38608	14
Q8PM59	PHI:3412	pstB	phosphate metabolism	346	Xanthomonas citri	2711;171249	Citrus sinensis (related: sweet orange);Citrus limonia (related: mandarin lime)	Eudicots	loss of pathogenicity	31678	28
Q53591	PHI:3461	hylB	encoding extracellular hyaluronidase	1311	Streptococcus agalactiae	7955;10090	Danio rerio (related: zebrafish);Mus musculus (related: house mouse)	Bony fishes;Rodents	reduced virulence	5752	9
O69729	PHI:3616	tcrY	Two-Component Regulatory Systems	1773	Mycobacterium tuberculosis	10090	Mus musculus (related: house mouse)	Rodents	increased virulence (hypervirulence)	37208	18
A0JC80	PHI:3623	RacA	Regulates production of ROS to maintain a symbiotic interaction withthe perennial rye grass.	35717	Epichloe festucae	4522	Lolium perenne (related: perennial ryegrass)	Monocots	increased virulence (hypervirulence)	28	1
L7N655	PHI:3630	PepN	Probable aminopeptidase	1773	Mycobacterium tuberculosis	10090	Mus musculus (related: house mouse)	Rodents	increased virulence (hypervirulence)	18828	10
O05877	PHI:3634	Rv3232c	Unknown, possible transcriptional regulator	1773	Mycobacterium tuberculosis	10090	Mus musculus (related: house mouse)	Rodents	reduced virulence	5238	5
Q879S6	PHI:3659	HxfA (PD_2118) (pspA)	HL secreted protein, HxfA	2371	Xylella fastidiosa	29760	Vitis vinifera (related: wine grape)	Eudicots	increased virulence (hypervirulence)	7786	6
D4I0C5	PHI:3676;PHI:3682	rmf3	-	552	Erwinia amylovora	23211	Pyrus communis (related: pear)	Eudicots	unaffected pathogenicity	834	1
Q97R98	PHI:3684	SP_0927	Transcription facot	1313	Streptococcus pneumoniae	10090	Mus musculus (related: house mouse)	Rodents	reduced virulence	46074	12
E8XEV4	PHI:3723	RNase E	endoribonucleases	28901	Salmonella enterica	7137	Galleria mellonella (related: greater wax moth)	Moths	reduced virulence	68846	11
A1AEN2	PHI:3731	LuxS	controller in the Quorum sensing	562	Escherichia coli	9031	Gallus gallus (related: chicken)	Birds	reduced virulence	13016	1
D0ZRW0	PHI:3761	sseB	Secreted effector protein	28901	Salmonella enterica	10090	Mus musculus (related: house mouse)	Rodents	effector (plant avirulence determinant)	4060	7
Q6D927	PHI:3843	tadA	Regulation of the Flp/Tad Pilus	29471	Pectobacterium atrosepticum	4113	Solanum tuberosum (related: potato)	Eudicots	reduced virulence	4412	2
Q6D927	PHI:3843	tadA	Regulation of the Flp/Tad Pilus	29471	Pectobacterium atrosepticum	4113	Solanum tuberosum (related: potato)	Eudicots	reduced virulence	4412	11
Q96VU5	PHI:387	UGD1	UDP-glucose dehydrogenase	5207	Cryptococcus neoformans	10090	Mus musculus (related: house mouse)	Rodents	loss of pathogenicity	53976	10
Q8ZLT3	PHI:3878	pnp	polynucleotide phosphorylase, an exoribonuclease involved in RNA processing and degradation	28901	Salmonella enterica	9823	Sus scrofa (related: pig)	Even-toed ungulates	reduced virulence	115516	88
Q5K2R7	PHI:393	CpCOT1	Serine/threonine protein kinase	5111	Claviceps purpurea	4550	Secale cereale (related: rye)	Monocots	loss of pathogenicity	32	1
Q4UY20	PHI:3943	XC_0979	Fructose-bisphosphate aldolase	339	Xanthomonas campestris	3726	Raphanus sativus (related: radish)	Eudicots	reduced virulence	2880	4
Q4UUL4	PHI:3945	XC_2203	Nucleotide diphosphate kinase	339	Xanthomonas campestris	3726	Raphanus sativus (related: radish)	Eudicots	reduced virulence	9834	1
Q4UZ13	PHI:3962	XC_0630	Hypothetical protein with AIM24 domain	339	Xanthomonas campestris	3726	Raphanus sativus (related: radish)	Eudicots	reduced virulence	390	1
Q4UWM4	PHI:3965	XC_1481	Beta-lactamase	339	Xanthomonas campestris	3726	Raphanus sativus (related: radish)	Eudicots	reduced virulence	5848	10
Q4UTV7	PHI:3968	XC_2466	Aspartate alpha-decarboxylase	339	Xanthomonas campestris	3726	Raphanus sativus (related: radish)	Eudicots	reduced virulence	11618	13
J4W5V1	PHI:3992;PHI:8630	creA;BbcreA	carbon catabolite repressor transcription factor homologue;Carbon catabolite repressor	176275	Beauveria bassiana	7137	Galleria mellonella (related: greater wax moth)	Moths	reduced virulence	4	1
I1RZL3	PHI:3996	FgFim	Fimbrin is a cytoskeletal protein associated with microfilament core bundles in microvilli, microspikes, stereocilia, membrane ruffles, and cell-substratum attachment sites.	5518	Fusarium graminearum	4565	Triticum aestivum (related: bread wheat)	Monocots	reduced virulence	46	3
J5K8Q8	PHI:3270	ARSEF 2860	Contribute to the fundamental biology and physiology.	176275	Beauveria bassiana	7137	Galleria mellonella (related: greater wax moth)	Moths	reduced virulence	56	2
Q8PM59	PHI:3412	pstB	phosphate metabolism	346	Xanthomonas citri	2711;171249	Citrus sinensis (related: sweet orange);Citrus limonia (related: mandarin lime)	Eudicots	loss of pathogenicity	31678	49
B4EJI4	PHI:3451	BceR	response regulator	95486	Burkholderia cenocepacia	3879	Medicago sativa (related: alfalfa)	Eudicots	unaffected pathogenicity	3194	3
Q8J214	PHI:346	CRU1	Cell cycle	5270	Ustilago maydis	4577	Zea mays (related: maize)	Monocots	reduced virulence	114	2
Q97NA0	PHI:3477	arcT	Part of the arginine deiminase system	1313	Streptococcus pneumoniae	10090	Mus musculus (related: house mouse)	Rodents	reduced virulence	36266	37
B0LFQ7	PHI:3523	Bx-Prx	Reproduction and pathogenicity	6326	Bursaphelenchus xylophilus	3350	Pinus thunbergii (related: japanese black pine)	Seed plants	loss of pathogenicity	33900	21
H6VMG0	PHI:3594	Ptp2	Protein tyrosine phosphatases	5207	Cryptococcus neoformans	10090	Mus musculus (related: house mouse)	Rodents	reduced virulence	190	4
Q4WUL6	PHI:362;PHI:2520	LYS4;LYSF	Homoaconitase;Homoaconitate hydratase	746128	Aspergillus fumigatus	Lethal pathogen phenotype	Lethal pathogen phenotype	Lethal pathogen phenotype	lethal;loss of pathogenicity	6606	1
P9WIN1	PHI:3636	Rv2702	Polyphosphate glucokinase	1773	Mycobacterium tuberculosis	10090	Mus musculus (related: house mouse)	Rodents	unaffected pathogenicity	1964	1
C8TZQ2	PHI:3714	OxyR	oxidative stress response regulator	562	Escherichia coli	10090	Mus musculus (related: house mouse)	Rodents	reduced virulence	69592	52
J9WML2	PHI:3721	Pdpg2	pH signaling transcription factor	36651	Penicillium digitatum	55188	Citrus unshiu (related: satsuma mandarin)	Eudicots	reduced virulence	194	1
E8XEV4	PHI:3723	RNase E	endoribonucleases	28901	Salmonella enterica	7137	Galleria mellonella (related: greater wax moth)	Moths	reduced virulence	68846	46
D0ZV20	PHI:3736	sipD (sspD)	Secreted effector protein	28901	Salmonella enterica	10090	Mus musculus (related: house mouse)	Rodents	effector (plant avirulence determinant)	1804	6
Q04HU1	PHI:3898	HtrA	serine protease	1313	Streptococcus pneumoniae	10090	Mus musculus (related: house mouse)	Rodents	reduced virulence	10042	9
Q8NKE9	PHI:394	CRK1	CDK-related kinase	5270	Ustilago maydis	4577	Zea mays (related: maize)	Monocots	loss of pathogenicity	72	2
Q4UYA7	PHI:3950	XC_0892	Glutamate-1-semialdehyde aminotransferase	339	Xanthomonas campestris	3726	Raphanus sativus (related: radish)	Eudicots	reduced virulence	30922	43
P23926	PHI:4002	anr	oxygen-sensitive regulator	287	Pseudomonas aeruginosa	10090	Mus musculus (related: house mouse)	Rodents	reduced virulence	2028	1
J9Z755	PHI:4027	AatB	Autotransporter	562	Escherichia coli	8839	Anas platyrhynchos (related: mallard)	Birds	reduced virulence	184	2
A6QFU3	PHI:4037	cydB	Terminal Oxidases	1280	Staphylococcus aureus	10090	Mus musculus (related: house mouse)	Rodents	reduced virulence	3956	6
U3M7S2	PHI:3268	YraS	Heat sensitive alkyl sulphatase	29486	Yersinia ruckeri	8022	Oncorhynchus mykiss (related: rainbow trout)	Bony fishes	unaffected pathogenicity	19096	7
Q4WIQ3	PHI:3277	gnoA	S-nitrosoglutathione reductase	746128	Aspergillus fumigatus	10090	Mus musculus (related: house mouse)	Rodents	unaffected pathogenicity	4334	3
Q6GFE2	PHI:3285	saNOS	NO-synthase	1280	Staphylococcus aureus	10090	Mus musculus (related: house mouse)	Rodents	reduced virulence	4744	13
Q8PG84	PHI:3295	XbmR	transcriptional activator of the NtrC family	346	Xanthomonas citri	37656	Citrus x paradisi (related: grapefruit)	Eudicots	reduced virulence	18	1
B8F4F0	PHI:3319	gpT	involved in pathogenicity	738	Glaesserella parasuis	10090	Mus musculus (related: house mouse)	Rodents	reduced virulence	6456	4
Q4WT11	PHI:3323	sskB	MAP kinase kinase kinase of the HOG (high-osmolarity glycerol response) pathway	746128	Aspergillus fumigatus	10090	Mus musculus (related: house mouse)	Rodents	loss of pathogenicity	22	1
D4HX24	PHI:3336	rpoS	regulation of stress and starvation response	552	Erwinia amylovora	32224;23211	Eriobotrya japonica (related: loquat);Pyrus communis (related: pear)	Eudicots	unaffected pathogenicity;reduced virulence	42196	8
I1S028	PHI:3374	FgSln1	fungal development and pathogenicity	5518	Fusarium graminearum	4565	Triticum aestivum (related: bread wheat)	Monocots	reduced virulence	5978	4
Q63K61	PHI:3420	BPSS1504	involved in the integrity of the T6SS1 apparatus	28450	Burkholderia pseudomallei	10090	Mus musculus (related: house mouse)	Rodents	reduced virulence	1422	2
D2TV46	PHI:3449	crc1	Class 1 Serine Protease Autotransporter	67825	Citrobacter rodentium	10090	Mus musculus (related: house mouse)	Rodents	increased virulence (hypervirulence)	544	2
P67320	PHI:3464	nrdR	regulator	1314	Streptococcus pyogenes	10090	Mus musculus (related: house mouse)	Rodents	unaffected pathogenicity;reduced virulence	13802	35
P65607	PHI:3474	arcB	Part of the arginine deiminase system	1313	Streptococcus pneumoniae	10090	Mus musculus (related: house mouse)	Rodents	reduced virulence	10306	14
B4E5A0	PHI:3525	paaC	phenylacetic acid catabolism	95486	Burkholderia cenocepacia	6239	Caenorhabditis elegans (related: roundworm)	Nematodes	reduced virulence	12858	5
D3QJB2	PHI:3526	lacA	lactose negativity	28901	Salmonella enterica	10090	Mus musculus (related: house mouse)	Rodents	reduced virulence	93640	98
A3MZ94	PHI:3533	LonA	Lon proteases	715	Actinobacillus pleuropneumoniae	10090	Mus musculus (related: house mouse)	Rodents	reduced virulence	556	2
G3K6I0	PHI:3592	rpfC	encoding the histidine sensor kinase of the two-component system RfpC/RpfG	56454	Xanthomonas hortorum	4031	Pelargonium x hortorum (related: zonal pelargonium)	Eudicots	reduced virulence	5890	2
P9WGN1	PHI:3619	kdpE	Two-Component Regulatory Systems	1773	Mycobacterium tuberculosis	10090	Mus musculus (related: house mouse)	Rodents	increased virulence (hypervirulence)	3152	4
Q5AD21	PHI:3689	Pot13p	3-ketoacyl-CoA thiolases	5476	Candida albicans	9031	Gallus gallus (related: chicken)	Birds	unaffected pathogenicity	40582	13
J7KWZ6	PHI:3711	PCC21 _023220	Putative DNA-binding protein	554	Pectobacterium carotovorum	3711	Brassica rapa (related: field mustard)	Eudicots	reduced virulence	1366	1
Q97R47	PHI:3713	GHIP	Glycosy l Hydrolase	1313	Streptococcus pneumoniae	10090	Mus musculus (related: house mouse)	Rodents	unaffected pathogenicity	252	4
Q5SC61	PHI:3717;PHI:6717	mapk1;TgMAPK1	Mitogen-activated protein kinase;mitogen-activated protein kinase (MAPK) , a virulence factor	5811	Toxoplasma gondii	10090	Mus musculus (related: house mouse)	Rodents	reduced virulence	4	1
P26471	PHI:3726;PHI:6587	rfaL;waaL	O-antigen ligase	28901	Salmonella enterica	44689	Dictyostelium discoideum (related: amoeba)	Cellular slime molds	reduced virulence;loss of pathogenicity	10556	2
P26471	PHI:3726;PHI:6587	rfaL;waaL	O-antigen ligase	28901	Salmonella enterica	44689	Dictyostelium discoideum (related: amoeba)	Cellular slime molds	reduced virulence;loss of pathogenicity	10556	7
Q04866	PHI:3728	WzzST	chain length determinant	28901	Salmonella enterica	7137	Galleria mellonella (related: greater wax moth)	Moths	loss of pathogenicity	34226	9
D0ZEM2	PHI:3781	inv	required to initiate the internalization of a bacterium into the host organism	636	Edwardsiella tarda	7955	Danio rerio (related: zebrafish)	Bony fishes	reduced virulence	2410	7
Q9I7C1	PHI:3786	PA0005	acyltransferases	287	Pseudomonas aeruginosa	7067	Tenebrio molitor (related: yellow mealworm)	Beetles	increased virulence (hypervirulence)	454	2
Q9HW50	PHI:3788	PA4351	acyltransferases	287	Pseudomonas aeruginosa	7067	Tenebrio molitor (related: yellow mealworm)	Beetles	unaffected pathogenicity	762	3
Q70M91	PHI:3827	PilQ	The ligands for TNF-a and IL-8 in a glycan-dependent manner, and their del-etion results in decreased virulence and increased survival in a mouse model	487	Neisseria meningitidis	10090	Mus musculus (related: house mouse)	Rodents	reduced virulence	55266	18
O69641	PHI:3846	CcsX	thioredoxin, necessary for heme insertion into cytochrome c	1773	Mycobacterium tuberculosis	10090	Mus musculus (related: house mouse)	Rodents	reduced virulence	32	1
Q7Z9J6	PHI:386	TSA1	Thiol peroxidase	5207	Cryptococcus neoformans	10090	Mus musculus (related: house mouse)	Rodents	reduced virulence	8908	6
B0BES0	PHI:3934	cpnox2	part of NADPH Oxidase Complex	5111	Claviceps purpurea	4550	Secale cereale (related: rye)	Monocots	increased virulence (hypervirulence)	78	2
Q4UWJ5	PHI:3952	XC_1510	TldD protein, DNA gyrase control?	339	Xanthomonas campestris	3726	Raphanus sativus (related: radish)	Eudicots	reduced virulence	30132	9
Q4UQL6	PHI:3957	XC_3615	Electron transfer flavoprotein alpha subunit	339	Xanthomonas campestris	3726	Raphanus sativus (related: radish)	Eudicots	reduced virulence	35990	6
Q4UWM4	PHI:3965	XC_1481	Beta-lactamase	339	Xanthomonas campestris	3726	Raphanus sativus (related: radish)	Eudicots	reduced virulence	5848	1
A6QGB6	PHI:3999	FMT	formyl methionyl transferase	1280	Staphylococcus aureus	10090	Mus musculus (related: house mouse)	Rodents	reduced virulence	33110	49
P23926	PHI:4002	anr	oxygen-sensitive regulator	287	Pseudomonas aeruginosa	10090	Mus musculus (related: house mouse)	Rodents	reduced virulence	2028	5
G1XLT2	PHI:4021	AoMls	Malate synthase	13349	Arthrobotrys oligospora	6239	Caenorhabditis elegans (related: roundworm)	Nematodes	reduced virulence	27188	4
I7GGT7	PHI:4036	ETX	involved in epsilon (ETX) toxin production	1502	Clostridium perfringens	10090	Mus musculus (related: house mouse)	Rodents	reduced virulence	274	2
J4UI12	PHI:3271	ARSEF 2860	Contribute to the fundamental biology and physiology.	176275	Beauveria bassiana	7137	Galleria mellonella (related: greater wax moth)	Moths	reduced virulence	96	3
W2E906	PHI:3274	dhbF	Siderophore Bacillibactin	1464	Paenibacillus larvae	7460	Apis mellifera (related: honey bee)	Bees	unaffected pathogenicity	3534	7
Q02N79	PHI:3290	pqsH	Quorum sensing system to regulate several genes required for its survival and pathogenicity within the host.	287	Pseudomonas aeruginosa	10090	Mus musculus (related: house mouse)	Rodents	reduced virulence	4500	7
A0A075TRB3	PHI:3301	patN	Production of Patulin	27334	Penicillium expansum	3750	Malus domestica (related: apple)	Eudicots	unaffected pathogenicity	390	1
Q75T35	PHI:332	CAC1	Adenylate cyclase	5462	Colletotrichum lagenaria	3659	Cucumis sativus (related: cucumber)	Eudicots	loss of pathogenicity	144	3
Q8GRB8	PHI:3432;PHI:3650	hupA	receptor;hemin receptor	672	Vibrio vulnificus	7936	Anguilla anguilla (related: european eel)	Bony fishes	loss of pathogenicity	308	1
Q8J214	PHI:346	CRU1	Cell cycle	5270	Ustilago maydis	4577	Zea mays (related: maize)	Monocots	reduced virulence	114	1
A1ABF3	PHI:3466	RstA	Part of a two component regulatory system	562	Escherichia coli	9031	Gallus gallus (related: chicken)	Birds	reduced virulence	15452	8
G4YTW4	PHI:3530	PsMPK7	stress-associated mitogen-activated protein kinase	67593	Phytophthora sojae	3847	Glycine max (related: soybean)	Eudicots	reduced virulence	30	1
A3MZ94	PHI:3533	LonA	Lon proteases	715	Actinobacillus pleuropneumoniae	10090	Mus musculus (related: house mouse)	Rodents	reduced virulence	556	2
P9WMF9	PHI:3614	dosR (devR);devR	Two-Component Regulatory Systems	1773	Mycobacterium tuberculosis	10090	Mus musculus (related: house mouse)	Rodents	increased virulence (hypervirulence)	2620	1
O69729	PHI:3616	tcrY	Two-Component Regulatory Systems	1773	Mycobacterium tuberculosis	10090	Mus musculus (related: house mouse)	Rodents	increased virulence (hypervirulence)	37208	3
P9WGM5	PHI:3620	narL	Two-Component Regulatory Systems	1773	Mycobacterium tuberculosis	10090	Mus musculus (related: house mouse)	Rodents	unaffected pathogenicity	27044	1
P95200	PHI:3629	Rv0392c	Possible dehydrogenase	1773	Mycobacterium tuberculosis	10090	Mus musculus (related: house mouse)	Rodents	unaffected pathogenicity	12614	8
P9WM35	PHI:3643	Rv1290c	Conserved hypothetical protein	1773	Mycobacterium tuberculosis	10090	Mus musculus (related: house mouse)	Rodents	reduced virulence	4434	2
Q97R47	PHI:3713	GHIP	Glycosy l Hydrolase	1313	Streptococcus pneumoniae	10090	Mus musculus (related: house mouse)	Rodents	unaffected pathogenicity	252	4
D0ZMG9	PHI:3737	sopA	Secreted effector protein	28901	Salmonella enterica	10090	Mus musculus (related: house mouse)	Rodents	effector (plant avirulence determinant)	248	1
Q6FM27	PHI:3793	ANP1	encode alpha -(1-6)-mannosyl-transferases	5478	Candida glabrata	10090	Mus musculus (related: house mouse)	Rodents	increased virulence (hypervirulence)	29292	9
Q881J7	PHI:3796	Pst-Lov	regulates light affected growth	317	Pseudomonas syringae	3702	Arabidopsis thaliana (related: thale cress)	Eudicots	reduced virulence	112	1
Q4UQG3	PHI:3799	hpaR2	encodes a putative TCS response regulator	339	Xanthomonas campestris	3726	Raphanus sativus (related: radish)	Eudicots	reduced virulence	54194	2
P43459	PHI:3803	PerA	LPS O-side chain	562	Escherichia coli	6239	Caenorhabditis elegans (related: roundworm)	Nematodes	reduced virulence	14148	5
Q59WD3	PHI:3807	Gpx3	glutathione peroxidase-like enzyme	5476	Candida albicans	10090	Mus musculus (related: house mouse)	Rodents	unaffected pathogenicity	14	2
G4MZ63	PHI:3824	MET12	methylenetetrahydrofolate reductase	318829	Magnaporthe oryzae	4513;4530	Hordeum vulgare (related: barley);Oryza sativa (related: rice)	Monocots	unaffected pathogenicity;loss of pathogenicity	4572	2
P64825	PHI:3873	dgc	degradation of the ubiquitous bacterial second messenger, cyclic di-GMP	1773	Mycobacterium tuberculosis	10090	Mus musculus (related: house mouse)	Rodents	unaffected pathogenicity	2718	3
Q04KT1	PHI:3912	Etrx2	surface -exposed thioredoxin-family lipoprotein	1313	Streptococcus pneumoniae	10090	Mus musculus (related: house mouse)	Rodents	unaffected pathogenicity	11002	6
Q4UWE2	PHI:3966	XC_1565	N-5-glutamine S-adenosyl-L-methionine-dependent methyltransferase	339	Xanthomonas campestris	3726	Raphanus sativus (related: radish)	Eudicots	reduced virulence	32420	18
G4NC97	PHI:3976	MoIlv6	Acetolactate synthases	318829	Magnaporthe oryzae	4513;4530	Hordeum vulgare (related: barley);Oryza sativa (related: rice)	Monocots	loss of pathogenicity	3002	15
Q9KKH8	PHI:4001	ysaC	Ysa T3SS are Ysc effectors	630	Yersinia enterocolitica	7227	Drosophila melanogaster (related: fruit fly)	Flies	effector (plant avirulence determinant)	678	3
Q2FID9	PHI:3348	nfu	aids in the maturation of Iron-Sulphur proteins	1280	Staphylococcus aureus	10090	Mus musculus (related: house mouse)	Rodents	reduced virulence	928	5
Q96VL3	PHI:339	CLPT1	GTPase	290576	Colletotrichum lindemuthianum	3885	Phaseolus vulgaris (related: kidney bean)	Eudicots	reduced virulence	468	19
B5Y383	PHI:3448	pgaC	Production of poly-b-linkedN-acetylglucosamine	573	Klebsiella pneumoniae	10090	Mus musculus (related: house mouse)	Rodents	reduced virulence	34140	18
Q4QFI1	PHI:3459	NTPDase1	nucleoside triphosphate diphosphohydrolases	5664	Leishmania major	10090	Mus musculus (related: house mouse)	Rodents	reduced virulence	28	1
O42766	PHI:3497;PHI:2816	Bmh1p;BMH1	-;Multifunctional signal-modulating	5476	Candida albicans	Lethal pathogen phenotype	Lethal pathogen phenotype	Lethal pathogen phenotype	lethal;reduced virulence	76	2
O42766	PHI:3497;PHI:2816	Bmh1p;BMH1	-;Multifunctional signal-modulating	5476	Candida albicans	Lethal pathogen phenotype	Lethal pathogen phenotype	Lethal pathogen phenotype	lethal;reduced virulence	76	1
J9VNZ8	PHI:3528	PHO89	Phosphate Acquisition and Storage	5207	Cryptococcus neoformans	10090	Mus musculus (related: house mouse)	Rodents	reduced virulence	366	3
Q8TFX6	PHI:354	GPAB	G alpha protein subunit	746128	Aspergillus fumigatus	10090	Mus musculus (related: house mouse)	Rodents	reduced virulence	32	1
P95200	PHI:3629	Rv0392c	Possible dehydrogenase	1773	Mycobacterium tuberculosis	10090	Mus musculus (related: house mouse)	Rodents	unaffected pathogenicity	12614	2
Q4WUL6	PHI:362;PHI:2520	LYS4;LYSF	Homoaconitase;Homoaconitate hydratase	746128	Aspergillus fumigatus	Lethal pathogen phenotype	Lethal pathogen phenotype	Lethal pathogen phenotype	lethal;loss of pathogenicity	6606	12
P9WG11	PHI:3635	Rv0930	PstA component of phosphate uptake	1773	Mycobacterium tuberculosis	10090	Mus musculus (related: house mouse)	Rodents	unaffected pathogenicity	51586	6
A7DV80	PHI:3648	vep20	Transferrin receptors	672	Vibrio vulnificus	10090;7936	Mus musculus (related: house mouse);Anguilla anguilla (related: european eel)	Rodents;Bony fishes	unaffected pathogenicity;loss of pathogenicity	18	1
Q5J4D6	PHI:365;PHI:2267	Mls1;MLS1	Malate synthase	13684	Parastagonospora nodorum	4564	Triticum (related: wheat)	Monocots	loss of pathogenicity	776	1
Q87C95	PHI:3660	BfeA (PD_1198)	Ferric enterobacyin receptor, BfeA	2371	Xylella fastidiosa	29760	Vitis vinifera (related: wine grape)	Eudicots	increased virulence (hypervirulence)	1224	1
Q87AN1	PHI:3666	HxfB (PD_1792) (pspA)	Hemagglutinin adhesin, secreted protein	2371	Xylella fastidiosa	29760	Vitis vinifera (related: wine grape)	Eudicots	increased virulence (hypervirulence)	1360	5
D0ZLQ7	PHI:3668;PHI:4693;PHI:4698;PHI:9435	MgtC;mgtC	Required for intramacrophage survival and growth in low Mg2+.;Virulence protein;cellulose synthesis regulation	28901	Salmonella enterica	10090	Mus musculus (related: house mouse)	Rodents	effector (plant avirulence determinant);reduced virulence;increased virulence (hypervirulence)	33222	5
C8TZQ2	PHI:3714	OxyR	oxidative stress response regulator	562	Escherichia coli	10090	Mus musculus (related: house mouse)	Rodents	reduced virulence	69592	7
Q56056	PHI:3724	RNase III	endoribonucleases	28901	Salmonella enterica	7137	Galleria mellonella (related: greater wax moth)	Moths	reduced virulence	13628	39
Q9HXY6	PHI:3784	PA3646	acyltransferases	287	Pseudomonas aeruginosa	7067	Tenebrio molitor (related: yellow mealworm)	Beetles	reduced virulence	35472	7
I1R9N5	PHI:3910	FgSAT	Serine O-acetyltransferase	5518	Fusarium graminearum	4565	Triticum aestivum (related: bread wheat)	Monocots	unaffected pathogenicity	432	1
Q4UU61	PHI:3953	XC_2359	Elongation factor P	339	Xanthomonas campestris	3726	Raphanus sativus (related: radish)	Eudicots	reduced virulence	11366	7
Q4UZE1	PHI:3959	XC_0501	NADH pyrophosphatase	339	Xanthomonas campestris	3726	Raphanus sativus (related: radish)	Eudicots	reduced virulence	25524	10
L2FHG9	PHI:3972	CDA	Chitin deacetylase	474922	Colletotrichum gloeosporioides	3435	Persea americana (related: avocado)	Flowering plants	unaffected pathogenicity	1540	7
Q99YP4	PHI:3981	RocA	metabolic regulator with activity beyond the CovR/S regulon	36470	Streptococcus sp. 'group a'	10090	Mus musculus (related: house mouse)	Rodents	increased virulence (hypervirulence)	896	2
N4VQQ5	PHI:3280	CoRAS1	Ras genes	5465	Colletotrichum orbiculare	3659	Cucumis sativus (related: cucumber)	Eudicots	lethal	226	5
A0A097IB07	PHI:3281;PHI:4819	AS87_04050	Vi polysaccharide biosynthesis protein VipB/TviC;Lipopolysaccharide Biosynthesis and Pathogenicity	34085	Riemerella anatipestifer	8839	Anas platyrhynchos (related: mallard)	Birds	reduced virulence	26360	6
Q4USG7	PHI:3282	NagZ	b-lactamase induction	339	Xanthomonas campestris	3712	Brassica oleracea (no common name found)	Eudicots	reduced virulence	43522	3
Q75T35	PHI:332	CAC1	Adenylate cyclase	5462	Colletotrichum lagenaria	3659	Cucumis sativus (related: cucumber)	Eudicots	loss of pathogenicity	144	3
B5TQV9	PHI:3325	PGM	phosphoglucomutase	1348	Streptococcus parauberis	8255	Paralichthys olivaceus (related: japanese flounder)	Bony fishes	reduced virulence	29910	50
C1L2I8	PHI:3344	CodY	metabolic regulator	1639	Listeria monocytogenes	10090	Mus musculus (related: house mouse)	Rodents	reduced virulence	2998	2
Q8XT88	PHI:3419	fcs	feruloyl-CoA synthetase involved in HCA degradation	305	Ralstonia solanacearum	4081	Solanum lycopersicum (related: tomato)	Eudicots	reduced virulence	94	1
Q9HV74	PHI:3440	CbrA	Sensor Kinase	287	Pseudomonas aeruginosa	44689;10090;10114	Dictyostelium discoideum (related: amoeba);Mus musculus (related: house mouse);Rattus (related: rat)	Cellular slime molds;Rodents	unaffected pathogenicity;reduced virulence	29920	11
Q53591	PHI:3461	hylB	encoding extracellular hyaluronidase	1311	Streptococcus agalactiae	7955;10090	Danio rerio (related: zebrafish);Mus musculus (related: house mouse)	Bony fishes;Rodents	reduced virulence	5752	11
B4E5A2	PHI:3524	paaA	phenylacetic acid catabolism	95486	Burkholderia cenocepacia	6239	Caenorhabditis elegans (related: roundworm)	Nematodes	reduced virulence	14714	6
B4E5A0	PHI:3525	paaC	phenylacetic acid catabolism	95486	Burkholderia cenocepacia	6239	Caenorhabditis elegans (related: roundworm)	Nematodes	reduced virulence	12858	1
I1RNS1	PHI:355	GzmetE	Homoserine O-acetyltransferase	5518	Fusarium graminearum	4564	Triticum (related: wheat)	Monocots	reduced virulence	56	1
H6VMG0	PHI:3594	Ptp2	Protein tyrosine phosphatases	5207	Cryptococcus neoformans	10090	Mus musculus (related: house mouse)	Rodents	reduced virulence	190	1
P96368	PHI:3617	trcS	Two-Component Regulatory Systems	1773	Mycobacterium tuberculosis	10090	Mus musculus (related: house mouse)	Rodents	increased virulence (hypervirulence)	2220	3
P96368	PHI:3617	trcS	Two-Component Regulatory Systems	1773	Mycobacterium tuberculosis	10090	Mus musculus (related: house mouse)	Rodents	increased virulence (hypervirulence)	2220	4
P9WNC3	PHI:3627	Rv2924c	Formamidopyrimidine-DNA-glycosylase	1773	Mycobacterium tuberculosis	10090	Mus musculus (related: house mouse)	Rodents	unaffected pathogenicity	29650	5
D4HUY4	PHI:3674;PHI:3680	yhbH	a novel ribosome-associated modulation protein	552	Erwinia amylovora	23211	Pyrus communis (related: pear)	Eudicots	loss of pathogenicity	12816	19
J7KWB2	PHI:3709	qseC	Sensor protein QseC bacterial adrenergic receptor	554	Pectobacterium carotovorum	3711	Brassica rapa (related: field mustard)	Eudicots	reduced virulence	4270	11
D0ZV22	PHI:3734	sipB (sspB)	Secreted effector protein	28901	Salmonella enterica	10090	Mus musculus (related: house mouse)	Rodents	effector (plant avirulence determinant)	88	1
D0ZRB2	PHI:3743	slrP	Secreted effector protein	28901	Salmonella enterica	10090	Mus musculus (related: house mouse)	Rodents	effector (plant avirulence determinant)	1104	3
D0ZRW0	PHI:3761	sseB	Secreted effector protein	28901	Salmonella enterica	10090	Mus musculus (related: house mouse)	Rodents	effector (plant avirulence determinant)	4060	3
Q9HYZ8	PHI:3787	PA3242	acyltransferases	287	Pseudomonas aeruginosa	7067	Tenebrio molitor (related: yellow mealworm)	Beetles	increased virulence (hypervirulence)	18690	2
Q4UQG2	PHI:3800	hpaS	TCS sensor kinase	339	Xanthomonas campestris	3726	Raphanus sativus (related: radish)	Eudicots	loss of pathogenicity	32514	5
P05431	PHI:3826	PilE	The ligands for TNF-a and IL-8 in a glycan-dependent manner, and their del-etion results in decreased virulence and increased survival in a mouse model	487	Neisseria meningitidis	10090	Mus musculus (related: house mouse)	Rodents	reduced virulence	202	6
Q04IL2	PHI:3900	SFP	serine protease	1313	Streptococcus pneumoniae	10090	Mus musculus (related: house mouse)	Rodents	unaffected pathogenicity	7368	2
Q02RX2	PHI:3915	SuhB	an essential gene for the T3SS gene expression	287	Pseudomonas aeruginosa	10090	Mus musculus (related: house mouse)	Rodents	loss of pathogenicity	26766	4
Q4UY20	PHI:3943	XC_0979	Fructose-bisphosphate aldolase	339	Xanthomonas campestris	3726	Raphanus sativus (related: radish)	Eudicots	reduced virulence	2880	2
Q4UWE2	PHI:3966	XC_1565	N-5-glutamine S-adenosyl-L-methionine-dependent methyltransferase	339	Xanthomonas campestris	3726	Raphanus sativus (related: radish)	Eudicots	reduced virulence	32420	5
A6QGB6	PHI:3999	FMT	formyl methionyl transferase	1280	Staphylococcus aureus	10090	Mus musculus (related: house mouse)	Rodents	reduced virulence	33110	20
Q6FSR7	PHI:3287	CgVps34	catalytic subunit of the C. glabrata PI3K complex	5478	Candida glabrata	10090	Mus musculus (related: house mouse)	Rodents	reduced virulence	16	2
D4HX24	PHI:3336	rpoS	regulation of stress and starvation response	552	Erwinia amylovora	32224;23211	Eriobotrya japonica (related: loquat);Pyrus communis (related: pear)	Eudicots	unaffected pathogenicity;reduced virulence	42196	29
Q882L6	PHI:3350	bifA	c-di-GMP phosphodiesterase	317	Pseudomonas syringae	4081	Solanum lycopersicum (related: tomato)	Eudicots	reduced virulence	930	3
Q6X269	PHI:338	CLB2	B-type Cyclin	5270	Ustilago maydis	4577	Zea mays (related: maize)	Monocots	reduced virulence	94	2
W8DVN3	PHI:3408	TssD	virulence mechanism	553	Pantoea ananatis	4679	Allium cepa (related: onion)	Monocots	unaffected pathogenicity	26	1
Q8XT88	PHI:3419	fcs	feruloyl-CoA synthetase involved in HCA degradation	305	Ralstonia solanacearum	4081	Solanum lycopersicum (related: tomato)	Eudicots	reduced virulence	94	1
Q833J1	PHI:3441	tcpF	encodes a protein resembling mammalian and bacterial TIR proteins	1351	Enterococcus faecalis	10090	Mus musculus (related: house mouse)	Rodents	unaffected pathogenicity	2058	1
B4EJI4	PHI:3451	BceR	response regulator	95486	Burkholderia cenocepacia	3879	Medicago sativa (related: alfalfa)	Eudicots	unaffected pathogenicity	3194	3
Q9KSD8	PHI:3482	VprA	response regulator	666	Vibrio cholerae	10090	Mus musculus (related: house mouse)	Rodents	reduced virulence	638	3
G7RUY1	PHI:3531	pld1	Lipid metabolism	573	Klebsiella pneumoniae	10090	Mus musculus (related: house mouse)	Rodents	loss of pathogenicity	322	2
P9WNC3	PHI:3627	Rv2924c	Formamidopyrimidine-DNA-glycosylase	1773	Mycobacterium tuberculosis	10090	Mus musculus (related: house mouse)	Rodents	unaffected pathogenicity	29650	26
O05895	PHI:3637	alkB (Rv3252c)	transmembrane alkane-1-monooxygenase	1773	Mycobacterium tuberculosis	10090	Mus musculus (related: house mouse)	Rodents	increased virulence (hypervirulence)	658	1
P9WKZ3	PHI:3642	Rv3404c	Hypothetical protein	1773	Mycobacterium tuberculosis	10090	Mus musculus (related: house mouse)	Rodents	reduced virulence	106	3
Q879S6	PHI:3659	HxfA (PD_2118) (pspA)	HL secreted protein, HxfA	2371	Xylella fastidiosa	29760	Vitis vinifera (related: wine grape)	Eudicots	increased virulence (hypervirulence)	7786	12
Q97R98	PHI:3684	SP_0927	Transcription facot	1313	Streptococcus pneumoniae	10090	Mus musculus (related: house mouse)	Rodents	reduced virulence	46074	37
J7KWZ6	PHI:3711	PCC21 _023220	Putative DNA-binding protein	554	Pectobacterium carotovorum	3711	Brassica rapa (related: field mustard)	Eudicots	reduced virulence	1366	8
Q4V037	PHI:3719	XC_0249	encodes a protein with a class III nucleotidyl cyclase domain, is required for cyclic GMP synthesis	339	Xanthomonas campestris	3726	Raphanus sativus (related: radish)	Eudicots	reduced virulence	310	1
D0ZX10	PHI:3780	sssB	Secreted effector protein	28901	Salmonella enterica	10090	Mus musculus (related: house mouse)	Rodents	effector (plant avirulence determinant)	18652	8
Q9HW50	PHI:3788	PA4351	acyltransferases	287	Pseudomonas aeruginosa	7067	Tenebrio molitor (related: yellow mealworm)	Beetles	unaffected pathogenicity	762	3
Q4UQG3	PHI:3799	hpaR2	encodes a putative TCS response regulator	339	Xanthomonas campestris	3726	Raphanus sativus (related: radish)	Eudicots	reduced virulence	54194	8
J9VQQ3	PHI:3801	Pmc1	putative vacuolar calcium ATPase	5207	Cryptococcus neoformans	10090	Mus musculus (related: house mouse)	Rodents	reduced virulence	108	2
I1RN81	PHI:3832	Fgcdc42	Rho GTPases	5518	Fusarium graminearum	4565	Triticum aestivum (related: bread wheat)	Monocots	reduced virulence	18	1
Q4JIM2	PHI:3866	IDH	isoepoxyedon dehydrogenase	27334	Penicillium expansum	3750	Malus domestica (related: apple)	Eudicots	reduced virulence	7130	1
P64829	PHI:3872	pde	synthesis of the ubiquitous bacterial second messenger, cyclic di-GMP	1773	Mycobacterium tuberculosis	10090	Mus musculus (related: house mouse)	Rodents	reduced virulence	8	1
Q04LM7	PHI:3911	Etrx1	surface -exposed thioredoxin-family lipoprotein	1313	Streptococcus pneumoniae	10090	Mus musculus (related: house mouse)	Rodents	unaffected pathogenicity	19300	14
Q02RX2	PHI:3915	SuhB	an essential gene for the T3SS gene expression	287	Pseudomonas aeruginosa	10090	Mus musculus (related: house mouse)	Rodents	loss of pathogenicity	26766	19
A0Q881	PHI:3916	AnsP	amino acid transporter	263	Francisella tularensis	10090	Mus musculus (related: house mouse)	Rodents	reduced virulence	3220	1
Q4UZD3	PHI:3942	XC_0509	Phosphoribosylamine-glycine ligase	339	Xanthomonas campestris	3726	Raphanus sativus (related: radish)	Eudicots	reduced virulence	30132	18
Q4UVI4	PHI:3944	XC_1876	Argininosuccinate lyase	339	Xanthomonas campestris	3726	Raphanus sativus (related: radish)	Eudicots	reduced virulence	9456	1
Q4UYA7	PHI:3950	XC_0892	Glutamate-1-semialdehyde aminotransferase	339	Xanthomonas campestris	3726	Raphanus sativus (related: radish)	Eudicots	reduced virulence	30922	9
Q4UWJ5	PHI:3952	XC_1510	TldD protein, DNA gyrase control?	339	Xanthomonas campestris	3726	Raphanus sativus (related: radish)	Eudicots	reduced virulence	30132	25
Q4UU61	PHI:3953	XC_2359	Elongation factor P	339	Xanthomonas campestris	3726	Raphanus sativus (related: radish)	Eudicots	reduced virulence	11366	2
Q4UZA5	PHI:3960	XC_0537	ATP-dependant DNA helicase	339	Xanthomonas campestris	3726	Raphanus sativus (related: radish)	Eudicots	reduced virulence	16180	1
Q4UXH1	PHI:3964	XC_1182	Glutathione synthetase	339	Xanthomonas campestris	3726	Raphanus sativus (related: radish)	Eudicots	reduced virulence	4	1
G4N740	PHI:4024	MoST1	hexose transporter-like protein	318829	Magnaporthe oryzae	4513;4530	Hordeum vulgare (related: barley);Oryza sativa (related: rice)	Monocots	unaffected pathogenicity	436	2
Q6XSF5	PHI:334	CGB1	G beta protein subunit	5016	Bipolaris maydis	4577	Zea mays (related: maize)	Monocots	loss of pathogenicity	106	4
Q81Z68	PHI:3446	yceH	Tellurite Resistance	1392	Bacillus anthracis	10090	Mus musculus (related: house mouse)	Rodents	reduced virulence	5754	15
P83774	PHI:3514	Asc1	Component of the 40S ribosomal subunit	5476	Candida albicans	10090	Mus musculus (related: house mouse)	Rodents	loss of pathogenicity	26	1
J9VI93	PHI:3515	Gat1	Zinc nger containing transcriptional regulators	5207	Cryptococcus neoformans	10090	Mus musculus (related: house mouse)	Rodents	unaffected pathogenicity	20	1
I1RNS1	PHI:355	GzmetE	Homoserine O-acetyltransferase	5518	Fusarium graminearum	4564	Triticum (related: wheat)	Monocots	reduced virulence	56	1
B1LE77	PHI:3611	iutA	aerobactin	562	Escherichia coli	9031	Gallus gallus (related: chicken)	Birds	reduced virulence	8	1
P9WI77	PHI:3625	pknE	Kinase	1773	Mycobacterium tuberculosis	10090	Mus musculus (related: house mouse)	Rodents	unaffected pathogenicity	96	1
Q8YFR7	PHI:3645;PHI:7184	bpdA	cyclic-di-GMP-specific phosphodiesterase;Phosphodiesterase	29459	Brucella melitensis	10090	Mus musculus (related: house mouse)	Rodents	reduced virulence;loss of pathogenicity	710	2
Q71VZ1	PHI:3652	gshF	Glutathione biosynthesis	1639	Listeria monocytogenes	10090	Mus musculus (related: house mouse)	Rodents	reduced virulence;loss of pathogenicity	16278	46
Q87DK1	PHI:3663	gluP (PD_0681)	Glucose kinase, Glk	2371	Xylella fastidiosa	29760	Vitis vinifera (related: wine grape)	Eudicots	increased virulence (hypervirulence)	30406	4
E8X960	PHI:3727	WzzfepE	Ferric enterobactin transport protein FepE	28901	Salmonella enterica	7137	Galleria mellonella (related: greater wax moth)	Moths	loss of pathogenicity	3876	6
Q04866	PHI:3728	WzzST	chain length determinant	28901	Salmonella enterica	7137	Galleria mellonella (related: greater wax moth)	Moths	loss of pathogenicity	34226	11
D0ZLQ3	PHI:3751	cigR	Anti virulence factor	28901	Salmonella enterica	10090	Mus musculus (related: house mouse)	Rodents	increased virulence (hypervirulence)	2662	5
Q9ZI86	PHI:3782	PA3984	acyltransferases	287	Pseudomonas aeruginosa	7067	Tenebrio molitor (related: yellow mealworm)	Beetles	reduced virulence	21658	10
Q7BS42	PHI:3792	pic	Serin protease aut o transporter	562	Escherichia coli	9031	Gallus gallus (related: chicken)	Birds	reduced virulence	2498	2
Q4P5N0	PHI:382;PHI:2233	Smu1;SMU1	Serine/threonine kinase;putative protein-arginine methyltransferases	5270	Ustilago maydis	4577	Zea mays (related: maize)	Monocots	reduced virulence	46	1
Q0V515	PHI:3914	Sdh1	encodes succinic semialdehyde dehydrogenase	13684	Parastagonospora nodorum	4565	Triticum aestivum (related: bread wheat)	Monocots	reduced virulence	38554	41
P46592	PHI:392	CaMNT2	Alpha-1,2-mannosyltransferase	5476	Candida albicans	10090	Mus musculus (related: house mouse)	Rodents	reduced virulence	72	1
Q4UZG1	PHI:3941	XC_0481	Anthranilate synthase component II	339	Xanthomonas campestris	3726	Raphanus sativus (related: radish)	Eudicots	reduced virulence	30130	37
Q4UZL6	PHI:3958	XC_0423	Maltooligosyltrehalose trehalohydrolase	339	Xanthomonas campestris	3726	Raphanus sativus (related: radish)	Eudicots	reduced virulence	128	1
Q4UZ72	PHI:3961	XC_0570	Iron utilisation protein	339	Xanthomonas campestris	3726	Raphanus sativus (related: radish)	Eudicots	reduced virulence	4488	3
G1XLT2	PHI:4021	AoMls	Malate synthase	13349	Arthrobotrys oligospora	6239	Caenorhabditis elegans (related: roundworm)	Nematodes	reduced virulence	27188	4
Q99078	PHI:402;PHI:2224;PHI:6068	fuz7;FUZ7	MAP kinase kinase;-;Dual specificity protein kinase	5270	Ustilago maydis	4577	Zea mays (related: maize)	Monocots	unaffected pathogenicity;reduced virulence;loss of pathogenicity	22	1
U3M7S2	PHI:3268	YraS	Heat sensitive alkyl sulphatase	29486	Yersinia ruckeri	8022	Oncorhynchus mykiss (related: rainbow trout)	Bony fishes	unaffected pathogenicity	19096	8
P0CL88	PHI:3330	Xrn1p	cytoplasmic exonuclease	5207	Cryptococcus neoformans	7137	Galleria mellonella (related: greater wax moth)	Moths	reduced virulence	12	1
C1L2I8	PHI:3344	CodY	metabolic regulator	1639	Listeria monocytogenes	10090	Mus musculus (related: house mouse)	Rodents	reduced virulence	2998	10
Q2FID9	PHI:3348	nfu	aids in the maturation of Iron-Sulphur proteins	1280	Staphylococcus aureus	10090	Mus musculus (related: house mouse)	Rodents	reduced virulence	928	3
Q9F286	PHI:3404	yapG	Proteolytic processing	632	Yersinia pestis	10090	Mus musculus (related: house mouse)	Rodents	unaffected pathogenicity	24242	8
P67320	PHI:3464	nrdR	regulator	1314	Streptococcus pyogenes	10090	Mus musculus (related: house mouse)	Rodents	unaffected pathogenicity;reduced virulence	13802	11
Q97NA2	PHI:3475	arcC	Part of the arginine deiminase system	1313	Streptococcus pneumoniae	10090	Mus musculus (related: house mouse)	Rodents	reduced virulence	88588	70
P20582	PHI:3522	pqsD	Required for the synthesis of the Pseudomonas quinolone signal, a quorum sensing signal molecule that contributes to slow killing and the red death phenotype in C. Elegans.	287	Pseudomonas aeruginosa	6239	Caenorhabditis elegans (related: roundworm)	Nematodes	reduced virulence	6070	2
B2HSV6	PHI:3593	MgtC	intramacrophage growth/Mg2+ transport p-type ATPase	1781	Mycobacterium marinum	7955	Danio rerio (related: zebrafish)	Bony fishes	unaffected pathogenicity	564	7
Q83CA1	PHI:3599	PmrA	Response Regulator	777	Coxiella burnetii	9534;9606	Chlorocebus aethiops (related: grivet);Homo sapiens (related: human)	Primates	reduced virulence	8462	2
Q54970	PHI:3604	spxB	Pyruvate Oxidase Gene	1313	Streptococcus pneumoniae	10090	Mus musculus (related: house mouse)	Rodents	increased virulence (hypervirulence)	23410	25
P9WGL3	PHI:3618	kdpD	Two-Component Regulatory Systems	1773	Mycobacterium tuberculosis	10090	Mus musculus (related: house mouse)	Rodents	increased virulence (hypervirulence)	19868	3
A0JC80	PHI:3623	RacA	Regulates production of ROS to maintain a symbiotic interaction withthe perennial rye grass.	35717	Epichloe festucae	4522	Lolium perenne (related: perennial ryegrass)	Monocots	increased virulence (hypervirulence)	28	1
Q6MX39	PHI:3633	UmaA1	Unknown mycolic acid methyltransferase	1773	Mycobacterium tuberculosis	10090	Mus musculus (related: house mouse)	Rodents	increased virulence (hypervirulence)	2534	1
Q71VZ1	PHI:3652	gshF	Glutathione biosynthesis	1639	Listeria monocytogenes	10090	Mus musculus (related: house mouse)	Rodents	reduced virulence;loss of pathogenicity	16278	22
Q9P927	PHI:368	NOT4	Ubiquitin-conjugation	5476	Candida albicans	10090	Mus musculus (related: house mouse)	Rodents	reduced virulence	64	1
Q9P927	PHI:368	NOT4	Ubiquitin-conjugation	5476	Candida albicans	10090	Mus musculus (related: house mouse)	Rodents	reduced virulence	64	1
D0ZHS9	PHI:3760	spvB	Secreted effector protein	28901	Salmonella enterica	10090	Mus musculus (related: house mouse)	Rodents	effector (plant avirulence determinant)	5480	2
Q9HXY6	PHI:3784	PA3646	acyltransferases	287	Pseudomonas aeruginosa	7067	Tenebrio molitor (related: yellow mealworm)	Beetles	reduced virulence	35472	7
G4NES1	PHI:3814	AGL1	glycogen debranching enzymye	318829	Magnaporthe oryzae	4513;4530	Hordeum vulgare (related: barley);Oryza sativa (related: rice)	Monocots	reduced virulence	70	1
P0A3X0	PHI:3819	ymoA	represses the transcription and expression of T3SS genes at room temperature	632	Yersinia pestis	10090	Mus musculus (related: house mouse)	Rodents	increased virulence (hypervirulence)	3462	15
Q875J4	PHI:385	tgaA	G alpha protein subunit	29875	Trichoderma virens	39291	Athelia rolfsii (no common name found)	Basidiomycetes	reduced virulence	38	2
D2TT37	PHI:3858;PHI:6864	NleB1;nleB	T3SS effector protein;type III effector	67825	Citrobacter rodentium	10090	Mus musculus (related: house mouse)	Rodents	effector (plant avirulence determinant)	248	2
Q4JIM2	PHI:3866	IDH	isoepoxyedon dehydrogenase	27334	Penicillium expansum	3750	Malus domestica (related: apple)	Eudicots	reduced virulence	7130	1
Q4UQD0	PHI:3259	XC_3703	Cyclic di-GMP Effectors	339	Xanthomonas campestris	3726	Raphanus sativus (related: radish)	Eudicots	effector (plant avirulence determinant);reduced virulence	14686	8
B2SN05	PHI:3894	Prc	PDZ domain-containing proteases	347	Xanthomonas oryzae	4530	Oryza sativa (related: rice)	Monocots	reduced virulence	22074	7
Q04LM6	PHI:3913	SpMsrAB2	methionine sulfoxide reductase	1313	Streptococcus pneumoniae	10090	Mus musculus (related: house mouse)	Rodents	reduced virulence	16208	47
Q6FRH8	PHI:3286	CgVPS15	class III phosphoinositide 3-kinase	5478	Candida glabrata	10090	Mus musculus (related: house mouse)	Rodents	reduced virulence	14	1
Q8ZQE4	PHI:3928	MacB	ABC-Type Efux Pump	28901	Salmonella enterica	10090	Mus musculus (related: house mouse)	Rodents	reduced virulence	210316	161
D2UB90	PHI:3937	OmpA1	putative ompa family outer membrane protein precursor	29447	Xanthomonas albilineans	4547	Saccharum officinarum (related: sugarcane)	Monocots	reduced virulence	18252	6
B5TQV9	PHI:3325	PGM	phosphoglucomutase	1348	Streptococcus parauberis	8255	Paralichthys olivaceus (related: japanese flounder)	Bony fishes	reduced virulence	29910	83
Q4V006	PHI:3947	XC_0281	Oxidoreductase	339	Xanthomonas campestris	3726	Raphanus sativus (related: radish)	Eudicots	reduced virulence	26096	9
Q4UZJ1	PHI:3948	XC_0450	4-Hydroxyphenylpyruvate deoxygenase	339	Xanthomonas campestris	3726	Raphanus sativus (related: radish)	Eudicots	reduced virulence	350	1
W7N2A8	PHI:3383	FVEG_12531	fusaric acid biosynthesis	117187	Fusarium verticillioides	4577	Zea mays (related: maize)	Monocots	unaffected pathogenicity	19690	3
B2C317	PHI:4007;PHI:6948	flaA	Flagellin;-	446	Legionella pneumophila	10090	Mus musculus (related: house mouse)	Rodents	unaffected pathogenicity	1602	7
E4TAS8	PHI:4026	sip	siderophore-i nteracting protein	34085	Riemerella anatipestifer	8839	Anas platyrhynchos (related: mallard)	Birds	reduced virulence	1298	1
W7MT31	PHI:3387	FVEG_12523	fusaric acid biosynthesis	117187	Fusarium verticillioides	4577	Zea mays (related: maize)	Monocots	unaffected pathogenicity	12	1
W7MS01	PHI:3389	FVEG_12521	fusaric acid biosynthesis	117187	Fusarium verticillioides	4577	Zea mays (related: maize)	Monocots	unaffected pathogenicity	54786	34
Q97NA4	PHI:3473	arcA	Part of the arginine deiminase system	1313	Streptococcus pneumoniae	10090	Mus musculus (related: house mouse)	Rodents	reduced virulence	710	8
Q0GPY7	PHI:3491	lhnR	Tobacco hypersensitive responses, grape necrosis	373	Agrobacterium vitis	29760	Vitis vinifera (related: wine grape)	Eudicots	reduced virulence	930	5
B0LFQ7	PHI:3523	Bx-Prx	Reproduction and pathogenicity	6326	Bursaphelenchus xylophilus	3350	Pinus thunbergii (related: japanese black pine)	Seed plants	loss of pathogenicity	33900	18
D3QJB2	PHI:3526	lacA	lactose negativity	28901	Salmonella enterica	10090	Mus musculus (related: house mouse)	Rodents	reduced virulence	93640	63
J9VNZ8	PHI:3528	PHO89	Phosphate Acquisition and Storage	5207	Cryptococcus neoformans	10090	Mus musculus (related: house mouse)	Rodents	reduced virulence	366	2
P0AC26	PHI:3597	NirC	Nitrite transporter	562	Escherichia coli	9031	Gallus gallus (related: chicken)	Birds	reduced virulence	16612	12
P0AC26	PHI:3597	NirC	Nitrite transporter	562	Escherichia coli	9031	Gallus gallus (related: chicken)	Birds	reduced virulence	16612	11
Q6KD45	PHI:3610	iucD	aerobactin	562	Escherichia coli	9031	Gallus gallus (related: chicken)	Birds	reduced virulence	3418	2
O05853	PHI:3628	Rv3213c	Possible role in chromosome segregation	1773	Mycobacterium tuberculosis	10090	Mus musculus (related: house mouse)	Rodents	increased virulence (hypervirulence)	36668	40
Q87ET0	PHI:3662	PspB (PD_0218)	Serine protease, PspB	2371	Xylella fastidiosa	29760	Vitis vinifera (related: wine grape)	Eudicots	increased virulence (hypervirulence)	764	5
Q97RW0	PHI:3683	SP_0676	Transcription facot	1313	Streptococcus pneumoniae	10090	Mus musculus (related: house mouse)	Rodents	reduced virulence	35154	17
Q97RW0	PHI:3683	SP_0676	Transcription facot	1313	Streptococcus pneumoniae	10090	Mus musculus (related: house mouse)	Rodents	reduced virulence	35154	65
A1AEN2	PHI:3731	LuxS	controller in the Quorum sensing	562	Escherichia coli	9031	Gallus gallus (related: chicken)	Birds	reduced virulence	13016	6
D0ZV20	PHI:3736	sipD (sspD)	Secreted effector protein	28901	Salmonella enterica	10090	Mus musculus (related: house mouse)	Rodents	effector (plant avirulence determinant)	1804	2
D0ZVH8	PHI:3777	pagC	Secreted effector protein	28901	Salmonella enterica	10090	Mus musculus (related: house mouse)	Rodents	effector (plant avirulence determinant)	272	1
Q59KY8	PHI:378	SIT4	Protein phosphatase	5476	Candida albicans	10090	Mus musculus (related: house mouse)	Rodents	reduced virulence	66	3
Q9X6P4	PHI:3785	PA3644	acyltransferases	287	Pseudomonas aeruginosa	7067	Tenebrio molitor (related: yellow mealworm)	Beetles	reduced virulence	21272	7
Q881J7	PHI:3796	Pst-Lov	regulates light affected growth	317	Pseudomonas syringae	3702	Arabidopsis thaliana (related: thale cress)	Eudicots	reduced virulence	112	1
P43459	PHI:3803	PerA	LPS O-side chain	562	Escherichia coli	6239	Caenorhabditis elegans (related: roundworm)	Nematodes	reduced virulence	14148	3
G4N1E0	PHI:3809	TRA1	transcription factor	318829	Magnaporthe oryzae	4513;4530	Hordeum vulgare (related: barley);Oryza sativa (related: rice)	Monocots	reduced virulence	112	1
G4MUX6	PHI:3816	GSN1	Glycogen synthase	318829	Magnaporthe oryzae	4513;4530	Hordeum vulgare (related: barley);Oryza sativa (related: rice)	Monocots	reduced virulence	8738	3
Q70M91	PHI:3827	PilQ	The ligands for TNF-a and IL-8 in a glycan-dependent manner, and their del-etion results in decreased virulence and increased survival in a mouse model	487	Neisseria meningitidis	10090	Mus musculus (related: house mouse)	Rodents	reduced virulence	55266	4
Q7Z9J6	PHI:386	TSA1	Thiol peroxidase	5207	Cryptococcus neoformans	10090	Mus musculus (related: house mouse)	Rodents	reduced virulence	8908	13
B2SN05	PHI:3894	Prc	PDZ domain-containing proteases	347	Xanthomonas oryzae	4530	Oryza sativa (related: rice)	Monocots	reduced virulence	22074	2
I1R9N5	PHI:3910	FgSAT	Serine O-acetyltransferase	5518	Fusarium graminearum	4565	Triticum aestivum (related: bread wheat)	Monocots	unaffected pathogenicity	432	1
Q04KT1	PHI:3912	Etrx2	surface -exposed thioredoxin-family lipoprotein	1313	Streptococcus pneumoniae	10090	Mus musculus (related: house mouse)	Rodents	unaffected pathogenicity	11002	6
Q0V515	PHI:3914	Sdh1	encodes succinic semialdehyde dehydrogenase	13684	Parastagonospora nodorum	4565	Triticum aestivum (related: bread wheat)	Monocots	reduced virulence	38554	16
Q0PZG0	PHI:3979	vasK	T6SS effector	644	Aeromonas hydrophila	10090	Mus musculus (related: house mouse)	Rodents	effector (plant avirulence determinant)	14636	5
A6QFR9	PHI:4038	qoxB	Terminal Oxidases	1280	Staphylococcus aureus	10090	Mus musculus (related: house mouse)	Rodents	reduced virulence	34678	3
A4VUT3	PHI:4039	NisK	Two-component signal-transduction systems	1307	Streptococcus suis	10090	Mus musculus (related: house mouse)	Rodents	reduced virulence	982	3
D5AF41	PHI:4071	IMPDH	Inosine-5'-monophosphate dehydrogenase	1307	Streptococcus suis	9823	Sus scrofa (related: pig)	Even-toed ungulates	reduced virulence	51212	20
O07434	PHI:4070	RicR	Copper-Responsive RicR Regulon	1773	Mycobacterium tuberculosis	10090	Mus musculus (related: house mouse)	Rodents	reduced virulence	4840	26
B9J010	PHI:4077	entA	Bacillibactin siderophore	1396	Bacillus cereus	7137	Galleria mellonella (related: greater wax moth)	Moths	reduced virulence	10172	27
D4HXR8	PHI:4043	AcrD	a resistance-nodulation-cell division (RND) transporter	552	Erwinia amylovora	3750;23211	Malus domestica (related: apple);Pyrus communis (related: pear)	Eudicots	unaffected pathogenicity	22978	6
A4VUT4	PHI:4040	NisR	Two-component signal-transduction systems	1307	Streptococcus suis	10090	Mus musculus (related: house mouse)	Rodents	reduced virulence	588	2
Q9C2Y4	PHI:405	PDE1	aminophospholipid translocase;Tagged	318829	Magnaporthe oryzae	4530	Oryza sativa (related: rice)	Monocots	reduced virulence	222	3
A6QFR9	PHI:4038	qoxB	Terminal Oxidases	1280	Staphylococcus aureus	10090	Mus musculus (related: house mouse)	Rodents	reduced virulence	34678	17
V6A547	PHI:4074	wecA	virulence factor	615	Serratia marcescens	7091	Bombyx mori (related: domestic silkworm)	Moths	reduced virulence	30446	12
I7B318	PHI:4097	CovRS	regulation of virulence factors	1314	Streptococcus pyogenes	10090	Mus musculus (related: house mouse)	Rodents	increased virulence (hypervirulence)	712	2
Q8FXL4	PHI:4102	ibpA	heat-shock chaperone	29461	Brucella suis	10090	Mus musculus (related: house mouse)	Rodents	unaffected pathogenicity	11058	2
B7HJA5	PHI:4079	asbb	Bacillibactin siderophore	1396	Bacillus cereus	7137	Galleria mellonella (related: greater wax moth)	Moths	unaffected pathogenicity;reduced virulence	4016	4
A4VUT3	PHI:4039	NisK	Two-component signal-transduction systems	1307	Streptococcus suis	10090	Mus musculus (related: house mouse)	Rodents	reduced virulence	982	1
V6A547	PHI:4074	wecA	virulence factor	615	Serratia marcescens	7091	Bombyx mori (related: domestic silkworm)	Moths	reduced virulence	30446	2
A4VTH6	PHI:4076	BgaC	b -galactosidase	1307	Streptococcus suis	10090	Mus musculus (related: house mouse)	Rodents	unaffected pathogenicity	38308	45
G7TG38	PHI:4137	xrp8	Type III effector	347	Xanthomonas oryzae	4530	Oryza sativa (related: rice)	Monocots	effector (plant avirulence determinant)	1194	1
Q839C1	PHI:4139	ldh-1	Redox Balance	1351	Enterococcus faecalis	10090	Mus musculus (related: house mouse)	Rodents	unaffected pathogenicity;reduced virulence	23918	47
F5HCK8	PHI:415	IPMDH	3-isopropylmalate dehydrogenase	13684	Parastagonospora nodorum	4564	Triticum (related: wheat)	Monocots	loss of pathogenicity	216	3
Q03023	PHI:4152	aprA	alkaline protease	317	Pseudomonas syringae	3702;4081	Arabidopsis thaliana (related: thale cress);Solanum lycopersicum (related: tomato)	Eudicots	reduced virulence	396	1
B5XSN9	PHI:4162	phoQ	govern the expression of cps and of the loci implicated in lipid A remodeling	573	Klebsiella pneumoniae	7137	Galleria mellonella (related: greater wax moth)	Moths	reduced virulence	1920	1
B5XSN9	PHI:4162	phoQ	govern the expression of cps and of the loci implicated in lipid A remodeling	573	Klebsiella pneumoniae	7137	Galleria mellonella (related: greater wax moth)	Moths	reduced virulence	1920	3
U6ZEP7	PHI:4177	pecT	virulence negative regulators	1089444	Dickeya solani	4113	Solanum tuberosum (related: potato)	Eudicots	increased virulence (hypervirulence)	22	1
Q7CG15	PHI:4189	ypo3991	putative DNA binding protein	632	Yersinia pestis	10090	Mus musculus (related: house mouse)	Rodents	reduced virulence	49890	20
A0A034UYN5	PHI:4480	rcsC	Amylovoran production and pathogenticity	552	Erwinia amylovora	23211	Pyrus communis (related: pear)	Eudicots	loss of pathogenicity	27724	14
A7EZM9	PHI:4509	Ss-odc2	oxalate decarboxylase	5180	Sclerotinia sclerotiorum	3885;4081;3847;4045	Phaseolus vulgaris (related: kidney bean);Solanum lycopersicum (related: tomato);Glycine max (related: soybean);Apium graveolens (no common name found)	Eudicots	reduced virulence	56	1
F4MD93	PHI:4522	HlyA	induces Caspase-1/Caspase-4-dependent inflammatory cell death in human urothelial cells	562	Escherichia coli	10090	Mus musculus (related: house mouse)	Rodents	unaffected pathogenicity;reduced virulence	288	2
P0AE88	PHI:4523;PHI:8273;PHI:9363	cpxR;CpxR	response regulator (CpxR)-sensor kinase;Cytoplasmic transcriptional regulator;Two-component regulatory system response regulator	562	Escherichia coli	9031;8839	Gallus gallus (related: chicken);Anas platyrhynchos (related: mallard)	Birds	unaffected pathogenicity;reduced virulence	30652	21
Q4WQI8	PHI:4603	KexB	Kexin-like endoprotease	746128	Aspergillus fumigatus	10090	Mus musculus (related: house mouse)	Rodents	reduced virulence	50	3
A0A0B5JGW8	PHI:4607	BxCYP33C9	Cytochrome P450 Genes	6326	Bursaphelenchus xylophilus	88730	Pinus massoniana (related: chinese red pine)	Seed plants	reduced virulence	140	2
A5IXN3	PHI:4610	pdhB	Pyruvate Dehyrogenase	2110	Mycoplasma agalactiae	9606	Homo sapiens (related: human)	Primates	reduced virulence	49792	59
Q18A49	PHI:4611	Opp	Oligopeptide Permeases	1496	Clostridioides difficile	10036	Mesocricetus auratus (related: golden hamster)	Rodents	increased virulence (hypervirulence)	616	7
Q6FIU2	PHI:4625;PHI:8395	CgHog1;Cghog1	Stress-responsive mitogen-activated protein kinases;MAP kinase	5478	Candida glabrata	10090	Mus musculus (related: house mouse)	Rodents	unaffected pathogenicity;reduced virulence	28	1
E2QL90	PHI:4629	IbeR	IbeR controlled expression of stress-resistance genes and virulence genes.	562	Escherichia coli	10090	Mus musculus (related: house mouse)	Rodents	reduced virulence	21666	4
C5A8Z0	PHI:4633	dgcB	Diguanylate cyclase	337	Burkholderia glumae	4679	Allium cepa (related: onion)	Monocots	reduced virulence	2864	7
A4KCQ2	PHI:4635	qsmR	IclR-type transcriptional regulator	337	Burkholderia glumae	4679	Allium cepa (related: onion)	Monocots	reduced virulence	18	1
Q63LQ1	PHI:4664	bcaA	Autotransporter	28450	Burkholderia pseudomallei	10090	Mus musculus (related: house mouse)	Rodents	reduced virulence	3166	1
Q63LV4	PHI:4669	bpaE	Autotransporter	28450	Burkholderia pseudomallei	10090	Mus musculus (related: house mouse)	Rodents	reduced virulence	516	1
Q8Y9V5	PHI:4689	pgdA	Peptidoglycan deacetylase	1639	Listeria monocytogenes	10090	Mus musculus (related: house mouse)	Rodents	reduced virulence	33100	31
Q8Y9V5	PHI:4689	pgdA	Peptidoglycan deacetylase	1639	Listeria monocytogenes	10090	Mus musculus (related: house mouse)	Rodents	reduced virulence	33100	60
B2IMI0	PHI:4700	comX2	alternative sigma factor	1313	Streptococcus pneumoniae	10090	Mus musculus (related: house mouse)	Rodents	unaffected pathogenicity;reduced virulence	130	1
B2IQ18	PHI:4701	radC	DNA repair	1313	Streptococcus pneumoniae	10090	Mus musculus (related: house mouse)	Rodents	reduced virulence	53794	63
Q7WTI6	PHI:4861	IroE	Catecholate siderophore esterases	562	Escherichia coli	9031	Gallus gallus (related: chicken)	Birds	unaffected pathogenicity;reduced virulence	3790	1
Q9L446	PHI:4864	murN	Penicillin resistance causes decreased Ply release with concomitant increases in the amount of branched stem peptides.	1313	Streptococcus pneumoniae	10090	Mus musculus (related: house mouse)	Rodents	reduced virulence	6986	3
Q5A679	PHI:4906	Gyp1	A Golgi-associated protein	5476	Candida albicans	10090	Mus musculus (related: house mouse)	Rodents	reduced virulence	6	1
Q7VMW0	PHI:4910	LptA	PEA transferases	730	Haemophilus ducreyi	9606	Homo sapiens (related: human)	Primates	unaffected pathogenicity	29868	3
F2Z6H2	PHI:493	STE11	MAP kinase kinase kinase	5478	Candida glabrata	10090	Mus musculus (related: house mouse)	Rodents	reduced virulence	40	1
I6YE93	PHI:4963	TcdA	Exotoxins	1496	Clostridioides difficile	10090;10036	Mus musculus (related: house mouse);Mesocricetus auratus (related: golden hamster)	Rodents	unaffected pathogenicity;reduced virulence	428	8
P21264	PHI:501	ADE2	Phosphoribosylaminoimidazole carboxylase	4932	Saccharomyces cerevisiae	10090	Mus musculus (related: house mouse)	Rodents	reduced virulence	6646	16
G4NHC2	PHI:5034	MoADH1	alcohol dehydrogenase	318829	Magnaporthe oryzae	4530	Oryza sativa (related: rice)	Monocots	unaffected pathogenicity	34632	10
P03962	PHI:506	URA3	Orotidine 5'-phosphate decarboxylase	4932	Saccharomyces cerevisiae	10090	Mus musculus (related: house mouse)	Rodents	reduced virulence	2722	1
P03962	PHI:506	URA3	Orotidine 5'-phosphate decarboxylase	4932	Saccharomyces cerevisiae	10090	Mus musculus (related: house mouse)	Rodents	reduced virulence	2722	1
B4EY92	PHI:5063	ppk	Polyphosphate kinase	584	Proteus mirabilis	10090	Mus musculus (related: house mouse)	Rodents	reduced virulence	21110	3
D0C777	PHI:5092	PLD1	Phospholipases D	470	Acinetobacter baumannii	7137	Galleria mellonella (related: greater wax moth)	Moths	reduced virulence	1642	11
A0A0C9CDU9	PHI:5108	wbaV	OAg biosynthesis	28901	Salmonella enterica	10090	Mus musculus (related: house mouse)	Rodents	increased virulence (hypervirulence)	162	1
A0A0D2XVZ5	PHI:5236	Dnj1	-	5507	Fusarium oxysporum	4081	Solanum lycopersicum (related: tomato)	Eudicots	reduced virulence	1096	1
D2TIS0	PHI:5244	RegA	Transcriptional regulator of virulence	67825	Citrobacter rodentium	10090	Mus musculus (related: house mouse)	Rodents	reduced virulence	23112	8
E9R863	PHI:5267	UgeB	Epimerase	162425	Aspergillus nidulans	10090	Mus musculus (related: house mouse)	Rodents	increased virulence (hypervirulence)	8722	1
Q8Y0J2	PHI:5271	fabG1	3-ketoacyl-acyl carrier protein reductase	305	Ralstonia solanacearum	4081	Solanum lycopersicum (related: tomato)	Eudicots	lethal	120850	113
Q6IWN3	PHI:528	CLA4	Serine/threonine kinase	5270	Ustilago maydis	4577	Zea mays (related: maize)	Monocots	loss of pathogenicity	4	1
B4EHX2	PHI:5293	BCAM1331	Tyrosine kinases	95486	Burkholderia cenocepacia	7137	Galleria mellonella (related: greater wax moth)	Moths	reduced virulence	154	1
B4EDS9	PHI:5297	BCAL2200	Protein tyrosine phosphatases	95486	Burkholderia cenocepacia	7137	Galleria mellonella (related: greater wax moth)	Moths	reduced virulence	4686	2
Q88BF1	PHI:5305	OxyR	An oxidative stress-regulated transcription factor	317	Pseudomonas syringae	3702;4081	Arabidopsis thaliana (related: thale cress);Solanum lycopersicum (related: tomato)	Eudicots	reduced virulence	40326	43
A0A0H2WAC2	PHI:5327	bsaO	T3SS3 effector	28450	Burkholderia pseudomallei	10090	Mus musculus (related: house mouse)	Rodents	effector (plant avirulence determinant)	428	1
Q57PB8	PHI:5369	MarA	Transcriptional regulator	28901	Salmonella enterica	10090	Mus musculus (related: house mouse)	Rodents	reduced virulence	26692	17
Q5XTQ4	PHI:541	LIP1	Lipase	40559	Botrytis cinerea	3885;4081;13546;3570	Phaseolus vulgaris (related: kidney bean);Solanum lycopersicum (related: tomato);Gerbera (no common name found);Dianthus caryophyllus (related: clove pink)	Eudicots	unaffected pathogenicity	4104	2
G4N1P8	PHI:5440	ABA4	Abscisic Acid production	318829	Magnaporthe oryzae	4530	Oryza sativa (related: rice)	Monocots	reduced virulence	21706	24
A3N3I4	PHI:5467	LonC	Lon proteases	715	Actinobacillus pleuropneumoniae	10090	Mus musculus (related: house mouse)	Rodents	unaffected pathogenicity	32020	35
A0A0H2X5Q6	PHI:5547	prc	Tail-specific protease	339	Xanthomonas campestris	3712	Brassica oleracea (no common name found)	Eudicots	reduced virulence	466	3
Q9XC54	PHI:5548;PHI:6597	aphB;AphB	AphB and OhrR monitor redox-potential changes and respond with different kinetics;-	666	Vibrio cholerae	10090	Mus musculus (related: house mouse)	Rodents	reduced virulence	37190	6
Q4Q4W3	PHI:5554	LmABCB3	Mitochondrial ABC transporter	5664	Leishmania major	10090	Mus musculus (related: house mouse)	Rodents	reduced virulence	82884	185
P96058	PHI:560	sirA	-	28901	Salmonella enterica	10090	Mus musculus (related: house mouse)	Rodents	reduced virulence	5264	2
Q0QWD8	PHI:598	THIOL	3-ketoacyl-CoA thiolase	5022	Leptosphaeria maculans	3708	Brassica napus (related: rape)	Eudicots	reduced virulence	1758	2
A4VT78	PHI:6072	CodY	Global regulatory protein	1307	Streptococcus suis	10090	Mus musculus (related: house mouse)	Rodents	reduced virulence	228	4
Q6PT92	PHI:6133	blaCMY-2	Beta-lactamase	28901	Salmonella enterica	10090	Mus musculus (related: house mouse)	Rodents	reduced virulence	6326	8
A4VTU5	PHI:6138	cps2E	Glycosyltransferases	1307	Streptococcus suis	10090	Mus musculus (related: house mouse)	Rodents	reduced virulence	5678	8
A0A0E0UVG9	PHI:6144	galU	Resistance to a Wall teichoic acid (WTA)-binding bacteriophage	1639	Listeria monocytogenes	10090	Mus musculus (related: house mouse)	Rodents	reduced virulence	18176	26
Q9ZH29	PHI:6145	gtcA	Resistance to a Wall teichoic acid (WTA)-binding bacteriophage	1639	Listeria monocytogenes	10090	Mus musculus (related: house mouse)	Rodents	reduced virulence	1744	1
Q8ZMF9	PHI:6187	pimt	Protein isoaspartate methyl transferase	28901	Salmonella enterica	10090	Mus musculus (related: house mouse)	Rodents	reduced virulence	13800	8
Q724L7	PHI:6189	SpoVG	RNA-Binding Protein	1639	Listeria monocytogenes	10090	Mus musculus (related: house mouse)	Rodents	increased virulence (hypervirulence)	2424	10
Q9C2Y4	PHI:405	PDE1	aminophospholipid translocase;Tagged	318829	Magnaporthe oryzae	4530	Oryza sativa (related: rice)	Monocots	reduced virulence	222	8
V5XVU3	PHI:4073	Ser	virulence factor	615	Serratia marcescens	7091	Bombyx mori (related: domestic silkworm)	Moths	reduced virulence	1690	5
Q44636	PHI:4087	AtxA	toxin production	1392	Bacillus anthracis	9986	Oryctolagus cuniculus (related: rabbit)	Rabbits & hares	loss of pathogenicity	4624	8
B5L7M5	PHI:4094	AtlL	autolysin	28035	Staphylococcus lugdunensis	6239	Caenorhabditis elegans (related: roundworm)	Nematodes	reduced virulence	3842	15
Q830A6	PHI:4127	bgsB	Cell- Wall Glycolipids	1351	Enterococcus faecalis	10116	Rattus norvegicus (related: norway rat)	Rodents	reduced virulence	40774	13
Q9KNM2	PHI:4167	spoT	CT production	666	Vibrio cholerae	10090	Mus musculus (related: house mouse)	Rodents	unaffected pathogenicity;reduced virulence	8008	3
A0AUJ1	PHI:4182	Gib2	Scaffolding Protein Promoting cAMP Signaling	5207	Cryptococcus neoformans	10090	Mus musculus (related: house mouse)	Rodents	reduced virulence	26	2
A1AEE9	PHI:4218	smpB	trans -translation is a bacterial translational control system that directs the modication and degradation of proteins,	562	Escherichia coli	9031	Gallus gallus (related: chicken)	Birds	reduced virulence	9734	1
C5ACN1	PHI:4249	aroA	3-phosphoshikimate 1-carboxyvinyltransferase	337	Burkholderia glumae	4530	Oryza sativa (related: rice)	Monocots	reduced virulence	13524	2
G4MUR7	PHI:4475	MoTup1	general transcriptional repressor	318829	Magnaporthe oryzae	4513;4530	Hordeum vulgare (related: barley);Oryza sativa (related: rice)	Monocots	loss of pathogenicity	132	1
Q0WEH7	PHI:4563	TyrR	regulator of aromatic amino acid metabolism	632	Yersinia pestis	10090	Mus musculus (related: house mouse)	Rodents	reduced virulence	24644	2
Q3XXN7	PHI:4565	Acm	collagen adhesin	1352	Enterococcus faecium	10114	Rattus (related: rat)	Rodents	reduced virulence	13992	14
Q836D3	PHI:4577	AI-2	Quorum Sensing	1351	Enterococcus faecalis	10090	Mus musculus (related: house mouse)	Rodents	increased virulence (hypervirulence)	6864	30
K8DPN9	PHI:4584	FkpA	virulence factor	535744	Cronobacter universalis	9606	Homo sapiens (related: human)	Primates	reduced virulence	2376	3
A0A0B5J4U6	PHI:4609	BxCYP33D3	Cytochrome P450 Genes	6326	Bursaphelenchus xylophilus	88730	Pinus massoniana (related: chinese red pine)	Seed plants	reduced virulence	24	1
A0A031WAR9	PHI:4612	App	Oligopeptide Permeases	1496	Clostridioides difficile	10036	Mesocricetus auratus (related: golden hamster)	Rodents	increased virulence (hypervirulence)	111892	99
Q6FPF2	PHI:4626	CgSlt2	Stress-responsive mitogen-activated protein kinases	5478	Candida glabrata	10090	Mus musculus (related: house mouse)	Rodents	unaffected pathogenicity	4	1
P02829	PHI:463	HSP90	Heat Shock Protein	4932	Saccharomyces cerevisiae	10090	Mus musculus (related: house mouse)	Rodents	increased virulence (hypervirulence)	12886	10
P11989	PHI:4630	PafR	Transcription Regulator	562	Escherichia coli	10090	Mus musculus (related: house mouse)	Rodents	reduced virulence	49258	101
Q7BCK4	PHI:4647	IcsA	Adhesin Regulated by the Type III Secretion System	623	Shigella flexneri	10090	Mus musculus (related: house mouse)	Rodents	reduced virulence	96004	34
Q63LQ1	PHI:4664	bcaA	Autotransporter	28450	Burkholderia pseudomallei	10090	Mus musculus (related: house mouse)	Rodents	reduced virulence	3166	1
Q63UB0	PHI:4666	boaB	Autotransporter	28450	Burkholderia pseudomallei	10090	Mus musculus (related: house mouse)	Rodents	reduced virulence	3002	3
Q63KC6	PHI:4667	bpaA	Autotransporter	28450	Burkholderia pseudomallei	10090	Mus musculus (related: house mouse)	Rodents	reduced virulence	74	1
B2IPD1	PHI:4705	coiA	competence protein	1313	Streptococcus pneumoniae	10090	Mus musculus (related: house mouse)	Rodents	unaffected pathogenicity	4476	9
B2IM27	PHI:4706	dinF	MATE efflux family protein	1313	Streptococcus pneumoniae	10090	Mus musculus (related: house mouse)	Rodents	unaffected pathogenicity	9664	68
A0A024CHY4	PHI:4837	cipA	Phytotoxic Cyclic Lipodepsipeptides	36746	Pseudomonas cichorii	4236	Lactuca sativa (related: garden lettuce)	Eudicots	reduced virulence	3296	5
A0A024CHY4	PHI:4837	cipA	Phytotoxic Cyclic Lipodepsipeptides	36746	Pseudomonas cichorii	4236	Lactuca sativa (related: garden lettuce)	Eudicots	reduced virulence	3296	5
C4YN44	PHI:4903	Fdh3	Glutathione recycling enzymes/ S-nitrosoglutathione reductase	5476	Candida albicans	10090;7137	Mus musculus (related: house mouse);Galleria mellonella (related: greater wax moth)	Rodents;Moths	unaffected pathogenicity;reduced virulence	3748	2
Q7VL81	PHI:4912	PtdB	PEA transferases	730	Haemophilus ducreyi	9606	Homo sapiens (related: human)	Primates	unaffected pathogenicity	312	4
B4EIW7	PHI:4918	atsR	global virulence regulator	95486	Burkholderia cenocepacia	3702;7137	Arabidopsis thaliana (related: thale cress);Galleria mellonella (related: greater wax moth)	Eudicots;Moths	increased virulence (hypervirulence)	2246	5
I3VB56	PHI:4926	Rs-CRT	Ca2+-binding multifunctional protein that plays key roles in the parasitism, immune evasion, reproduction and pathogenesis.	46012	Radopholus similis	4081	Solanum lycopersicum (related: tomato)	Eudicots	reduced virulence	182	4
Q5WWE3	PHI:4975	LssB	Functional Type 1 Secretion System	446	Legionella pneumophila	5755	Acanthamoeba castellanii (no common name found)	Eukaryotes	reduced virulence	94540	85
Q5WYQ5	PHI:4977	RtxA	Functional Type 1 Secretion System	446	Legionella pneumophila	5755	Acanthamoeba castellanii (no common name found)	Eukaryotes	reduced virulence	64	2
J4UHQ6	PHI:5037	OpS1	PKS oosporein synthase 1	176275	Beauveria bassiana	7137	Galleria mellonella (related: greater wax moth)	Moths	reduced virulence	12	2
Q7BI20	PHI:5079	lmp1	Pathogen evasion of hostacquired immune defences, thereby facilitating persistent infection	139	Borreliella burgdorferi	10090	Mus musculus (related: house mouse)	Rodents	reduced virulence	18590	3
A0A0C9CDU9	PHI:5108	wbaV	OAg biosynthesis	28901	Salmonella enterica	10090	Mus musculus (related: house mouse)	Rodents	increased virulence (hypervirulence)	162	3
Q3Y044	PHI:5202	HMPREF0351_10115 (WxL locusC)	Involved in bile salt stress and endocarditis pathogenesis	1352	Enterococcus faecium	10114	Rattus (related: rat)	Rodents	reduced virulence	9850	16
A0A031WJD5	PHI:5260	GerS	Regulator of spore germination	1496	Clostridioides difficile	10036	Mesocricetus auratus (related: golden hamster)	Rodents	loss of pathogenicity	1124	7
B4EMX8	PHI:5294	BceF	Tyrosine kinases	95486	Burkholderia cenocepacia	7137	Galleria mellonella (related: greater wax moth)	Moths	reduced virulence	9032	1
Q63R85	PHI:5346	wcbS	Capsule	28450	Burkholderia pseudomallei	10090	Mus musculus (related: house mouse)	Rodents	reduced virulence	25448	2
Q8Y614	PHI:5373	GpsB	Cell division determinant	1639	Listeria monocytogenes	7137	Galleria mellonella (related: greater wax moth)	Moths	reduced virulence	3778	7
Q9A0A2	PHI:5386	S5nA	Virulence factor	1358	Lactococcus lactis	9606	Homo sapiens (related: human)	Primates	increased virulence (hypervirulence)	6424	7
Q8XRI9	PHI:5399	hpaG	Hypersensitive response and pathogenicity associated	305	Ralstonia solanacearum	3702;3880	Arabidopsis thaliana (related: thale cress);Medicago truncatula (related: barrel medic)	Eudicots	reduced virulence	86	1
Q5XTQ4	PHI:541	LIP1	Lipase	40559	Botrytis cinerea	3885;4081;13546;3570	Phaseolus vulgaris (related: kidney bean);Solanum lycopersicum (related: tomato);Gerbera (no common name found);Dianthus caryophyllus (related: clove pink)	Eudicots	unaffected pathogenicity	4104	5
G4NB53	PHI:5472	MoDeam	GlcN-6-phosphate deaminase	318829	Magnaporthe oryzae	4530	Oryza sativa (related: rice)	Monocots	reduced virulence	62930	28
B3VBK9	PHI:5495;PHI:5543;PHI:5576	Ecp6	Effector	5499	Passalora fulva	4081	Solanum lycopersicum (related: tomato)	Eudicots	effector (plant avirulence determinant)	1474	6
Q9C1U1	PHI:551	HIK1	Histidine Kinase	318829	Magnaporthe oryzae	4530	Oryza sativa (related: rice)	Monocots	unaffected pathogenicity	2750	4
A0A0H6ZQK4	PHI:5549	ohrR	AphB and OhrR monitor redox-potential changes and respond with different kinetics	666	Vibrio cholerae	10090	Mus musculus (related: house mouse)	Rodents	reduced virulence	5362	22
A0A0D6I3U0	PHI:5573	envC	Determinants for intrinsic CAMP resistance	28901	Salmonella enterica	10090	Mus musculus (related: house mouse)	Rodents	reduced virulence	34856	2
A0A0D6I3U0	PHI:5573	envC	Determinants for intrinsic CAMP resistance	28901	Salmonella enterica	10090	Mus musculus (related: house mouse)	Rodents	reduced virulence	34856	12
P87025	PHI:59	THR1	Reductase	5462	Colletotrichum lagenaria	3659	Cucumis sativus (related: cucumber)	Eudicots	reduced virulence	5758	15
H9L471	PHI:602	orf242	-	28901	Salmonella enterica	10090	Mus musculus (related: house mouse)	Rodents	unaffected pathogenicity	31324	11
Q83T39	PHI:605	ttrS	tetrathionate reductase	28901	Salmonella enterica	10090	Mus musculus (related: house mouse)	Rodents	unaffected pathogenicity	2464	4
A4VT78	PHI:6072	CodY	Global regulatory protein	1307	Streptococcus suis	10090	Mus musculus (related: house mouse)	Rodents	reduced virulence	228	1
Q5ADN1	PHI:6074	Tpd3	PP2A family of phosphatases	5476	Candida albicans	10090	Mus musculus (related: house mouse)	Rodents	reduced virulence	10	2
P52498	PHI:62	caRSR1	Cell morphogenesis	5476	Candida albicans	10090	Mus musculus (related: house mouse)	Rodents	reduced virulence	164	5
F5B5Y4	PHI:6206	BbCypC	Cyclophilin	176275	Beauveria bassiana	7137	Galleria mellonella (related: greater wax moth)	Moths	unaffected pathogenicity	20968	33
P31489	PHI:6253	YadA	Adhesion	630	Yersinia enterocolitica	10090	Mus musculus (related: house mouse)	Rodents	unaffected pathogenicity;reduced virulence	2592	8
A0A0D5YID2	PHI:6263;PHI:6383	adeA	RND MDR efflux system;Multidrug efflux protein	470	Acinetobacter baumannii	10090	Mus musculus (related: house mouse)	Rodents	unaffected pathogenicity;reduced virulence	3062	2
P57665	PHI:6274	Orn	Oligoribonuclease	287	Pseudomonas aeruginosa	10090	Mus musculus (related: house mouse)	Rodents	reduced virulence	13050	9
O53317	PHI:6340	Rv3167c	Transcriptional repressor	1773	Mycobacterium tuberculosis	10090	Mus musculus (related: house mouse)	Rodents	increased virulence (hypervirulence)	184	1
Q8YF53	PHI:6367	tcpB	TIR-containing protein	29459	Brucella melitensis	10090	Mus musculus (related: house mouse)	Rodents	reduced virulence	288	1
Q5GVN1	PHI:6371	dgcA	diguanylate cyclase	347	Xanthomonas oryzae	4530	Oryza sativa (related: rice)	Monocots	unaffected pathogenicity;increased virulence (hypervirulence)	2232	2
Q9I324	PHI:6397	popB	fT3SS: insuring bacterial motility	287	Pseudomonas aeruginosa	10090	Mus musculus (related: house mouse)	Rodents	reduced virulence	336	1
G4N0E4	PHI:4056	Ldp1	LIM domain-containing proteins	318829	Magnaporthe oryzae	4513;4530	Hordeum vulgare (related: barley);Oryza sativa (related: rice)	Monocots	unaffected pathogenicity	20	1
V5XVU3	PHI:4073	Ser	virulence factor	615	Serratia marcescens	7091	Bombyx mori (related: domestic silkworm)	Moths	reduced virulence	1690	2
Q44643	PHI:4088	pXO2	toxin production	1392	Bacillus anthracis	9986	Oryctolagus cuniculus (related: rabbit)	Rabbits & hares	loss of pathogenicity	782	3
I7B318	PHI:4097	CovRS	regulation of virulence factors	1314	Streptococcus pyogenes	10090	Mus musculus (related: house mouse)	Rodents	increased virulence (hypervirulence)	712	4
Q830A5	PHI:4126	bgsA	Cell- Wall Glycolipids	1351	Enterococcus faecalis	10116	Rattus norvegicus (related: norway rat)	Rodents	reduced virulence	6592	15
D4F368	PHI:4148	Ivy	inhibitor of vertebrate lysozyme	636	Edwardsiella tarda	52904	Scophthalmus maximus (related: turbot)	Bony fishes	reduced virulence	38	1
C3LQZ4	PHI:4166	relA	CT production	666	Vibrio cholerae	10090	Mus musculus (related: house mouse)	Rodents	unaffected pathogenicity;reduced virulence	538	6
C5A9K4	PHI:4250	aroB	3-dehydroquinate synthase	337	Burkholderia glumae	4530	Oryza sativa (related: rice)	Monocots	reduced virulence	51814	21
Q9P932	PHI:428	TPK2	PKA catalytic subunit	5476	Candida albicans	10090	Mus musculus (related: house mouse)	Rodents	reduced virulence	26	1
Q3JLG7	PHI:4470	sctU	Type 3 Secretion System Cluster 3	28450	Burkholderia pseudomallei	10090	Mus musculus (related: house mouse)	Rodents	reduced virulence	9246	1
A0A034UTT8	PHI:4481	rcsD	Amylovoran production and pathogenticity	552	Erwinia amylovora	23211	Pyrus communis (related: pear)	Eudicots	loss of pathogenicity	28994	8
A0A034UTT8	PHI:4481	rcsD	Amylovoran production and pathogenticity	552	Erwinia amylovora	23211	Pyrus communis (related: pear)	Eudicots	loss of pathogenicity	28994	12
Q79G00	PHI:4486	mce1R	negative transcriptional regulator	1773	Mycobacterium tuberculosis	10090	Mus musculus (related: house mouse)	Rodents	increased virulence (hypervirulence)	1646	1
X5FD66	PHI:4525	PFP1	Encoding an Epc-N Domain-Containing Protein	914237	Rhynchosporium commune	4513	Hordeum vulgare (related: barley)	Monocots	reduced virulence	238	4
A0A095EN78	PHI:4555	URE1	Urease	552467	Cryptococcus gattii vgiii	10090	Mus musculus (related: house mouse)	Rodents	reduced virulence	132	2
X5FDR6	PHI:4558	T6SS1	Type VI secretion systems (T6SSs) effectors	562	Escherichia coli	8839	Anas platyrhynchos (related: mallard)	Birds	effector (plant avirulence determinant)	2906	4
I3U3N8	PHI:4564	CcpA	global transcriptional regulator of carbon catabolite repression	1352	Enterococcus faecium	10114	Rattus (related: rat)	Rodents	reduced virulence	211218	198
U5T3C0	PHI:4571	clfB	fibrinogen-binding protein	1280	Staphylococcus aureus	10114	Rattus (related: rat)	Rodents	reduced virulence	13654	24
Q1JLQ2	PHI:4652	MntE	Manganese Homeostasis	1314	Streptococcus pyogenes	10090	Mus musculus (related: house mouse)	Rodents	unaffected pathogenicity	53974	86
Q8Y9I8	PHI:4692	pbpX	Putative carboxypeptidase	1639	Listeria monocytogenes	10090	Mus musculus (related: house mouse)	Rodents	reduced virulence	20026	5
C4YDI6	PHI:471	CDC42	Polarity establishment protein	5476	Candida albicans	10090	Mus musculus (related: house mouse)	Rodents	loss of pathogenicity	86	1
P57698	PHI:4712	kdpB	Transport of small molecules	287	Pseudomonas aeruginosa	10090;6239;7227	Mus musculus (related: house mouse);Caenorhabditis elegans (related: roundworm);Drosophila melanogaster (related: fruit fly)	Rodents;Nematodes;Flies	reduced virulence	39766	41
Q5NEZ1	PHI:4729	wbtA	-	263	Francisella tularensis	10090	Mus musculus (related: house mouse)	Rodents	reduced virulence	32486	64
Q59RB8	PHI:477	ICL1	Isocitrate lyase	5476	Candida albicans	10090	Mus musculus (related: house mouse)	Rodents	reduced virulence	23004	5
P0A9E5	PHI:4876;PHI:7248	FNR;fnr	global regulator;Transcription factor, is a global regulator of pathways meant to facilitate gene expression	562	Escherichia coli	10090;9606	Mus musculus (related: house mouse);Homo sapiens (related: human)	Rodents;Primates	reduced virulence	4778	4
Q4WGK7	PHI:4893	aspB	septin	746128	Aspergillus fumigatus	10090;7137	Mus musculus (related: house mouse);Galleria mellonella (related: greater wax moth)	Rodents;Moths	unaffected pathogenicity;increased virulence (hypervirulence)	128	2
Q5WYQ5	PHI:4977	RtxA	Functional Type 1 Secretion System	446	Legionella pneumophila	5755	Acanthamoeba castellanii (no common name found)	Eukaryotes	reduced virulence	64	1
D0Z7V7	PHI:4981	mliC	Lysozyme Inhibitor	636	Edwardsiella tarda	52904	Scophthalmus maximus (related: turbot)	Bony fishes	reduced virulence	12	1
Q2G282	PHI:4991	PerR	hydrogen peroxide sensor	1280	Staphylococcus aureus	6239	Caenorhabditis elegans (related: roundworm)	Nematodes	reduced virulence	9438	44
B0LX67	PHI:5044	cna1	calcineurin	176275	Beauveria bassiana	7137	Galleria mellonella (related: greater wax moth)	Moths	reduced virulence	58	1
G4MVC4	PHI:5082	MoAcat1	Acetyl-CoA acetyltransferas	318829	Magnaporthe oryzae	4513;4530	Hordeum vulgare (related: barley);Oryza sativa (related: rice)	Monocots	reduced virulence	19750	6
G4MVC4	PHI:5082	MoAcat1	Acetyl-CoA acetyltransferas	318829	Magnaporthe oryzae	4513;4530	Hordeum vulgare (related: barley);Oryza sativa (related: rice)	Monocots	reduced virulence	19750	11
O51216	PHI:5102	RelBbu	Bifunctional enzyme responsible for both (p)ppGpp synthesis and hydrolysis	139	Borreliella burgdorferi	10090;6945	Mus musculus (related: house mouse);Ixodes scapularis (related: black-legged tick)	Rodents;Mites & ticks	unaffected pathogenicity;reduced virulence	774	3
B5QZL1	PHI:5109	prt	OAg biosynthesis	28901	Salmonella enterica	10090	Mus musculus (related: house mouse)	Rodents	reduced virulence	26094	9
D2TIS0	PHI:5244	RegA	Transcriptional regulator of virulence	67825	Citrobacter rodentium	10090	Mus musculus (related: house mouse)	Rodents	reduced virulence	23112	7
Q8L360	PHI:5248	RgfC	Sensor Histidine Kinase	1311	Streptococcus agalactiae	10090	Mus musculus (related: house mouse)	Rodents	increased virulence (hypervirulence)	388	5
Q8FDW4	PHI:5262	Sat	Auto transporter	562	Escherichia coli	10090	Mus musculus (related: house mouse)	Rodents	unaffected pathogenicity	238	4
B4EDS9	PHI:5297	BCAL2200	Protein tyrosine phosphatases	95486	Burkholderia cenocepacia	7137	Galleria mellonella (related: greater wax moth)	Moths	reduced virulence	4686	2
[truncated: 2,866 more rows]

## Sheet: Table S7. Virulence factor prof
Level1	Level2	VFs	Function	Species	Total_reads	Gene_Count
[truncated: 506 more rows]
